# Supplementary material for: Expedient synthesis of the heneicosasaccharyl mannose capped arabinomannan of the Mycobacterium tuberculosis cellular envelope by glycosyl carbonate donors
Source: PubMed Central journal article supplement (PMC5398307; doi:10.1039/c6sc04866h), 2016-11-15

# **Expedient Synthesis of Heneicosasaccharyl Mannose Capped Arabinomannan of Mycobacterium tuberculosis Cellular Envelope by Glycosyl Carbonate Donors**

Maidul Islam, Ganesh P. Shinde and Srinivas Hotha\*

Department of Chemistry, Indian Institute of Science Education and Research, Dr. Homi

Bhabha Road, Pune – 411 008

Ph. +91 20 2590 8015, E-mail: s.hotha@iiserpune.ac.in

## **Supporting Information**

### **Contents**

|                                                           | Page No  |
|-----------------------------------------------------------|----------|
| Materials and Methods                                     | S2       |
| Experimental Procedures                                   | S3-S11   |
| Compound Characterization Data                            | S12-S29  |
| $^1\text{H}$ -, $^{13}\text{C}$ -, 2D-NMR Spectral Charts | S30-S157 |

## Experimental Section

### Materials and Methods

Unless otherwise noted, materials were obtained from commercial suppliers and were used without further purification. Unless otherwise reported all reactions were performed under argon atmosphere. Removal of solvent in vacuo refers to distillation using a rotary evaporator attached to an efficient vacuum pump. Products obtained as solids or syrups were dried under high vacuum. Yields in the glycosidation reaction are computed based on the quantity of acceptor. Analytical thin-layer chromatography was performed on pre-coated silica plates (F<sub>254</sub>, 0.25 mm thickness); compounds were visualized by UV light or by staining with anisaldehyde spray. Optical rotations were measured on a digital polarimeter. IR spectra were recorded on a FT-IR spectrometer. NMR spectra were recorded either on a 400 or a 500 MHz with CDCl<sub>3</sub> as the solvent and TMS as the internal standard. High resolution mass spectroscopy was performed using ESI-TOF or MALDI-TOF mass analyzer. Low resolution mass spectroscopy (LRMS) was performed on UPLC-MS with TLC interface.

Characterization data for carbonate glycosyl donors was provided as the ratio of diastereomers are not required to be separated. The outcome of the glycosylation does not depend on the initial ratio of glycosyl donor. However, for confirmation, we have provided spectra charts of corresponding glycosyl carbonates which show that the donors that we are prepared are pure.

The diastereoselectivity of glycosidation reactions was confirmed from the ratio of integration in the <sup>1</sup>H NMR and corresponding <sup>13</sup>C NMR spectra. In the <sup>13</sup>C NMR spectrum, resonances due to the α-anomeric arabinofuranosidic linkages are identified at δ 103-109 ppm whereas β-anomeric arabinofuranosidic linkages are noticed at δ 97-102 ppm. 1,2-*trans* or α-anomeric mannopyranosidic linkages are identified based on the <sup>1</sup>J<sub>C-H</sub> values in the 2D-NMR spectrum which showed ~170Hz.

## Experimental procedures

**Procedure A: Synthesis of ethynyl cyclohexyl glycosyl carbonate donors (2,3,5a,5b,12,19,23,38,42):** To a rapidly stirring CH<sub>2</sub>Cl<sub>2</sub> solution of arabinofuranosyl or mannopyranosyl hemiacetal (1.0 mmol) and DMAP (1.5 mmol) at 25 °C, ethynyl cyclohexyl (4-nitrophenyl) carbonate (**11**) (1.2 mmol) was added and continued stirring at 25 °C for 2 h. After complete consumption of the hemiacetal, the reaction mixture was concentrated in vacuo and purified by silica gel column chromatography (n-hexane/EtOAc) to afford ethynyl cyclohexyl glycosyl carbonate donors containing trace quantity of the 4-nitro phenol. Eluents containing the compound are concentrated and redissolved in CH<sub>2</sub>Cl<sub>2</sub> and washed with sat. aq. NaHCO<sub>3</sub> solution to get **2,3,5a,5b,12,19,23,38,42** in 85-90% yield.

**Procedure B: Glycosylation using ethynyl cyclohexyl glycosyl carbonate donors:** To a solution of acceptor (**4,6,9,14,18,26,31,33,36,40,43,45**) (1.0 mmol) and donor (**2,3,5a,5b,12,19,23,38,42**) (1.0 mmol) in anhydrous CH<sub>2</sub>Cl<sub>2</sub> (15 mL) was added freshly activated 4Å MS powder (0.400 g) at 25 °C. After stirring at 25 °C for 10 minutes chloro[tris(2,4-di-*tert*-butylphenyl)phosphite]gold(I) (8mol%) and AgOTf (8mol%) were added to the reaction mixture and stirred for 15-25 minutes if the reaction was carried out at 25 °C and 5-8 h for reactions at -78 °C, the reaction was neutralized by Et<sub>3</sub>N and filtered through a bed of Celite®. The filtrate was concentrated in vacuo and the residue was purified by silica gel column chromatography using *n*-hexane/EtOAc as mobile phase to afford glycosides in 80-95% yield.

**Procedure C: Protection of alcohol using TBDPS-Cl:**

A solution of the allylarabinofuranoside (1 mmol) and imidazole (1.3 mmol) in anhydrous DMF (5 mL) was cooled at 0 °C and *tert*-butyldiphenylchlorosilane (1.2 mmol) was added dropwise under nitrogen atmosphere. The reaction mixture was gradually warmed up to 25 °C and stirred for 2 h. After the completion, the reaction mixture was quenched by adding ice cold water. The whole mixture was transferred to a separatory funnel and extracted with ethyl acetate (3x25 mL). The combined organic layers was washed with cold water and brine solution. Organic layer was dried over anhydrous Na<sub>2</sub>SO<sub>4</sub>, the organic layer was concentrated *in vacuo* and the residue was purified by silica gel column chromatography (ethyl acetate/hexanes) to obtain the desired product.

**Procedure D: Deprotection of the TBDPS-ethers:**

HF·py (3 mmol) was added dropwise under inert atmosphere to a solution of silyl ether (1 mmol) in pyridine (3 times to the volume of HF·py) at 0 °C. The reaction mixture was stirred for 5 h at 25 °C, 6N HCl was added to quench the reaction at 0 °C, diluted with EtOAc (25 mL) and washed successively with ice cold water (2x10 mL), saturated solution of NaHCO<sub>3</sub> (aq), and brine solution. Organic layer was dried anhydrous Na<sub>2</sub>SO<sub>4</sub>, concentrated *in vacuo*

to obtain a residue that was purified by silica gel column chromatography (ethyl acetate/hexanes) to furnish the alcohol.

**Procedure E:** *Protection of alcohols as benzyl ethers:*

To a solution of the alcohol (1 mmol) in anhydrous DMF (5 mL) was cooled to 0 °C under nitrogen atmosphere and NaH (60% oil dispersion, 1.3mmol per alcohol) was added and stirred for 10 minute at 0 °C, benzyl bromide (1.2 mmol per alcohol) was added dropwise and stirred for 2 h at 25 °C. The reaction mixture was poured into cold water with vigorous shaking, extraction with ethyl acetate (3x25 mL) and combined EtOAc layers was washed with cold water, brine solution, and dried over Na<sub>2</sub>SO<sub>4</sub>. The EtOAc solution was decanted and evaporated *in vacuo* to obtain a reddish brown coloured residue that was purified by column chromatography (ethyl acetate/hexanes) to obtain the benzyl ether(s) as pale yellow coloured syrup.

**Procedure F:** *Synthesis of Allyl glycoside from 1,2-orthoester:*

Ally alcohol (4 mmol) followed by PTSA (0.2 mmol) were added to a vigorously stirred solution of orthoester (1 mmol) in freshly prepared anhydrous CH<sub>2</sub>Cl<sub>2</sub> (10 mL) at 25 °C. After completion of the reaction, Et<sub>3</sub>N (2 mL) was added and the solvent was evaporated *in vacuo* and the crude compound was purified by conventional silica gel column chromatography (ethyl acetate/hexanes) to obtain the desired allyl glycoside.

**procedure G:** *Deprotection of allyl glycosides:*

To the solution of the allyl glycoside (1 mmol) in CH<sub>2</sub>Cl<sub>2</sub> (10 mL), PdCl<sub>2</sub> (0.2mmol) in MeOH (40mL) was added in five portions at 25 °C and stirred for 4-5 h. After completion of the reaction, excess amount of Et<sub>3</sub>N was added and the solid residue was filtered off through a pad of Celite<sup>®</sup>. The solvent was evaporated *in vacuo* and the crude compound was purified by conventional silica gel column chromatography (ethyl acetate/hexanes) to obtain the desired hemiacetal.

**Procedure H:** *Protection of levulinoate:*

A solution of the alcohol (1 mmol), DMAP (0.5 mmol) and levulinic acid (1.3 mmol) in dry CH<sub>2</sub>Cl<sub>2</sub> (10 mL) was cooled to 0 °C and *N,N*-Diisopropylcarbodiimide (1.5 mmol) was added dropwise under nitrogen atmosphere. The reaction mixture was gradually warmed to room temperature and stirred for 2 h. After completion of the reaction, CH<sub>2</sub>Cl<sub>2</sub> was evaporated under reduced pressure and the residue was purified by silica gel column chromatography (ethyl acetate/hexanes) to furnish the Lev ester.

**Procedure I:** *Deprotection of levulinoate:*



Hydrazine acetate (4 mmol) in THF (4 mL) was added to a solution of levulinoate (1 mmol) in MeOH (1 mL) at 25 °C and stirred for 45 minutes. The reaction was quenched by adding ice cold 1N HCl solution and washed successively with ethyl acetate (3x25 mL), water, saturated solution of NaHCO<sub>3</sub> (aq), and brine solution. After drying over Na<sub>2</sub>SO<sub>4</sub>, the organic layer was concentrated under diminished pressure and the residue was purified by column chromatography (ethyl acetate/hexanes) to afford the alcohol.

**Procedure J:** *Protection of alcohols as NAPethers:* [A. B. Smith, K. Basu, T. Bosanac, *J. Am. Chem. Soc.*, 2007, **129**, 14872]

To a solution of the alcohol (1 mmol) in anhydrous DMF (5 mL) was cooled to 0 °C under nitrogen atmosphere and NaH (60% oil dispersion, 1.3mmol per alcohol) was added and stirred for 10 minute at 0 °C, 2-bromomethyl naphthalene (1.2 mmol per alcohol) was added dropwise and stirred for 2 h at 25 °C. The reaction mixture was poured into cold water with vigorous shaking, extraction with ethyl acetate (3x25 mL) and combined EtOAc layers was washed with cold water, brine solution, and dried over Na<sub>2</sub>SO<sub>4</sub>. The EtOAc solution was decanted and evaporated *in vacuo* to obtain a reddish brown coloured residue that was purified by column chromatography (ethyl acetate/hexanes) to obtain the benzyl ether(s) as pale yellow coloured syrup.

**Procedure K:** *Deprotection of NAP ethers:* [A. B. Smith, K. Basu, T. Bosanac, *J. Am. Chem. Soc.*, 2007, **129**, 14872]

2,3-Dichloro-5,6-dicyano-1,4-benzoquinone (2 mmol) was added to a rapidly stirred solution of alcohol (1 mmol) in CH<sub>2</sub>Cl<sub>2</sub>-MeOH (1:4) at 25 °C. After 4 h, the reaction mixture was quenched by the addition of Et<sub>3</sub>N (reaction mixture turns black from brown) and solvent was evaporated under reduced pressure and the residue was purified by silica gel column chromatography (ethyl acetate/hexanes) to furnish the alcohol as a pale yellow coloured syrup.

**Procedure L:** *Synthesis of 1,2-acetonide of arabinose:*

2,2-Dimethoxy propane (1.25 mmol) and PTSA (0.2 mmol) were added to a vigorously stirring solution of C-5-O-TBDPS arabinofuranoside (1 mmol), activated 4Å MS in anhydrous CH<sub>2</sub>Cl<sub>2</sub> (50 mL) and stirred for 24 h at 25 °C. After completion of the reaction, excess Et<sub>3</sub>N was added, the solid residue was filtered off through Celite<sup>®</sup> bed. The solvent was evaporated *in vacuo* under reduced pressure and the crude compound was purified by column chromatography (ethyl acetate/hexanes) to obtain the desired araf-1,2-acetonite.

**Procedure M:** *Synthesis of benzoates:*

A solution of the alcohol (1 mmol) in anhydrous pyridine (10 mL) and DMAP (0.1 mmol) was cooled to 0 °C under nitrogen atmosphere and benzoyl chloride (1.2 mmol per alcohol) was added dropwise and stirred for 5 h at 25 °C. The reaction mixture was poured into cold water with vigorous shaking, neutralized by the addition of 6N HCl solution, extracted with ethyl acetate (3x50 mL) and combined EtOAc layers was washed with cold water, sat. NaHCO<sub>3</sub>, brine solution, and dried over Na<sub>2</sub>SO<sub>4</sub>. The EtOAc solution was decanted and evaporated *in vacuo* to obtain a reddish brown coloured residue that was purified by column chromatography (ethyl acetate/hexanes) to obtain the required benzoate.

**Procedure N:** *Saponification of benzoates:*

Freshly prepared NaOMe (0.1 mmol per benzoate) was added to a solution of the benzoate (1 mmol) in MeOH (10 mL) and stirred for 8 h at 25 °C. The reaction mixture was concentrated *in vacuo* to obtain a residue that was purified by column chromatography (ethyl acetate/hexanes) to obtain alcohol.

**Procedure O:** *Hydrogenolysis of compound 46:*

To a solution of the compound **46** (30 mg, 5.4 µmol) in 2 mL of MeOH-THF-H<sub>2</sub>O (4:3:3) under Hydrogen atmosphere (balloon pressure) was added 10% Pd(OH)<sub>2</sub>(2mg, 1.0 µmol) and stirred for 36 h at 25 °C. The reaction mixture was filtered through a pad of Celite® and the filtrate was evaporated *in vacuo* first and subsequently subjected to lyophilisation to afford the target compound **47** (14 mg, 90%) as a white solid.

**Procedure P:** *Synthesis of allyl arabinofuranoside from 1,2-acetonide:*

Allyl alcohol (2.12 mL, 30.8 mmol) was added to a solution of acetonide **25** (8.0 g, 15.4 mmol) in CH<sub>2</sub>Cl<sub>2</sub> (60 mL), stirred at 60 °C. After 5 min, PTSA (0.53 g, 3.1 mmol) was added and continued stirring for additional 1 h, the reaction mixture was neutralized by the addition of Et<sub>3</sub>N (excess), diluted with water and extracted with CH<sub>2</sub>Cl<sub>2</sub> (3x50 mL). Combined CH<sub>2</sub>Cl<sub>2</sub> layers was washed with a brine solution, dried over anhydrous sodium sulphate, decanted and concentrated *in vacuo* to obtain a residue that was partially purified by silica gel column chromatography (ethyl acetate/hexanes) to obtain α/β-allyl furanosides which were separated by flash chromatography by obtain diastereomerically pure **26** (3.6 g, 45%) as a pale yellow syrup.

# Schemes Annotated with Procedures and Yields

## Scheme 1

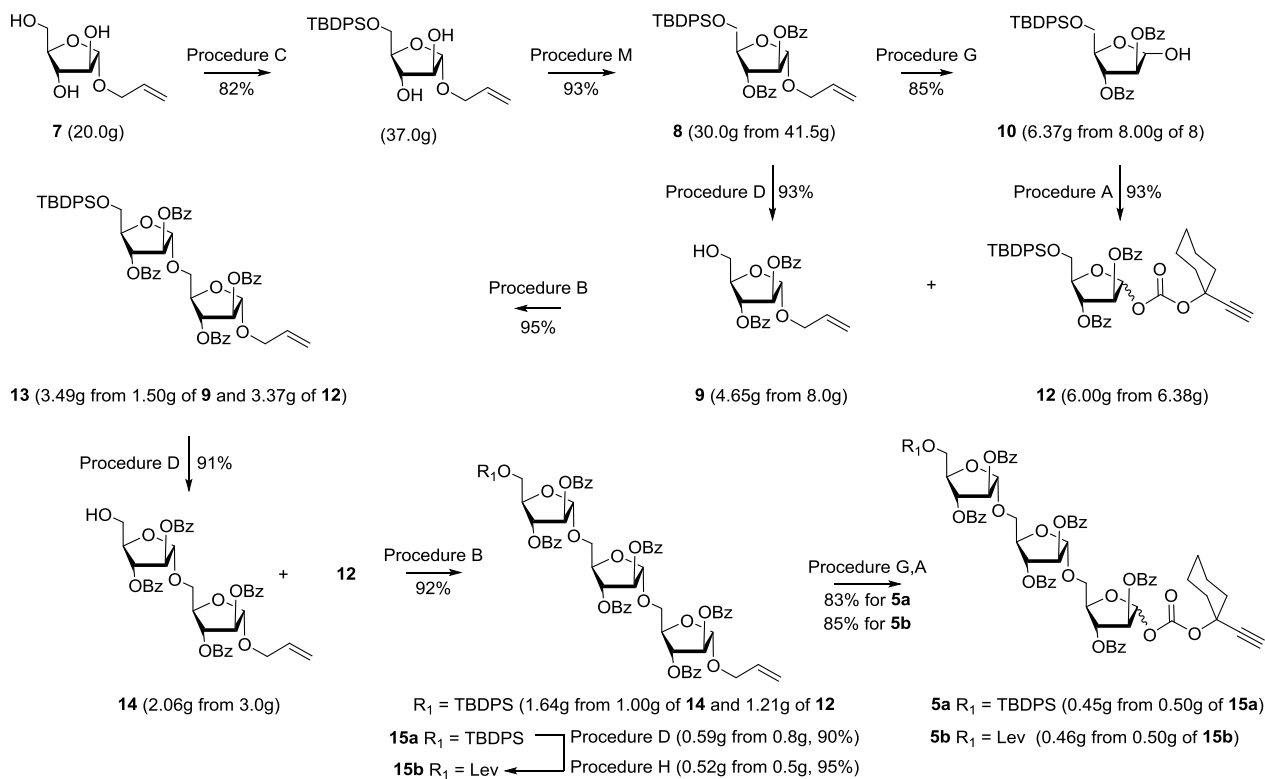

## Scheme 2

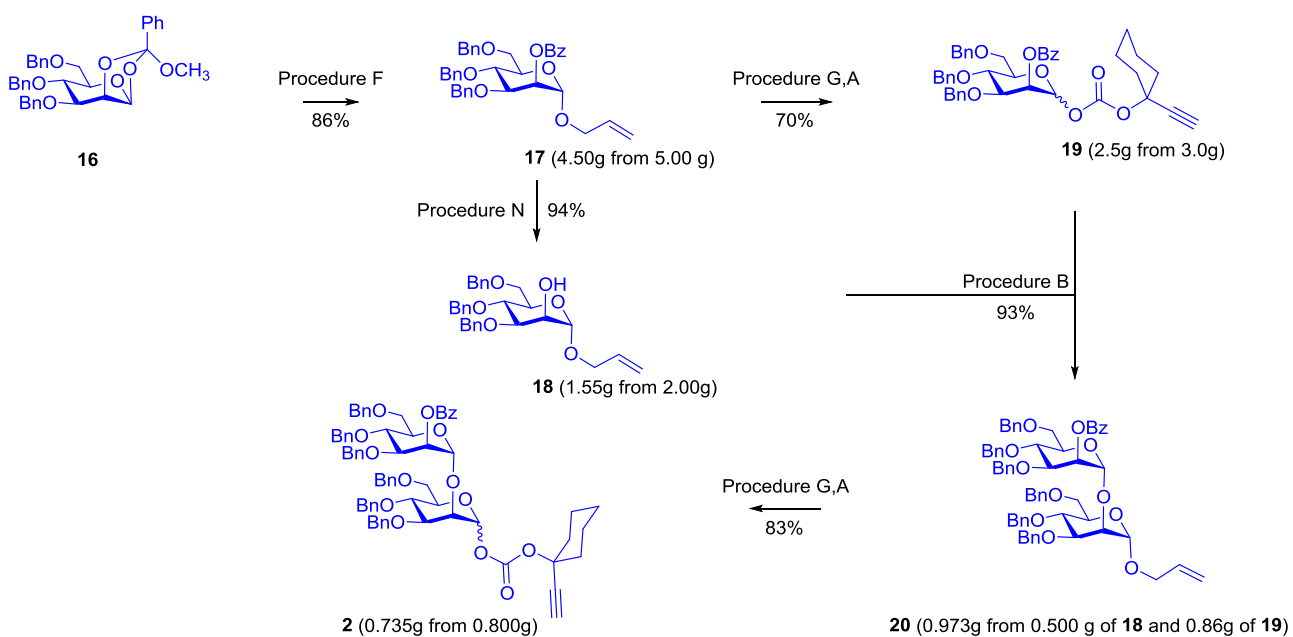

### Scheme 3

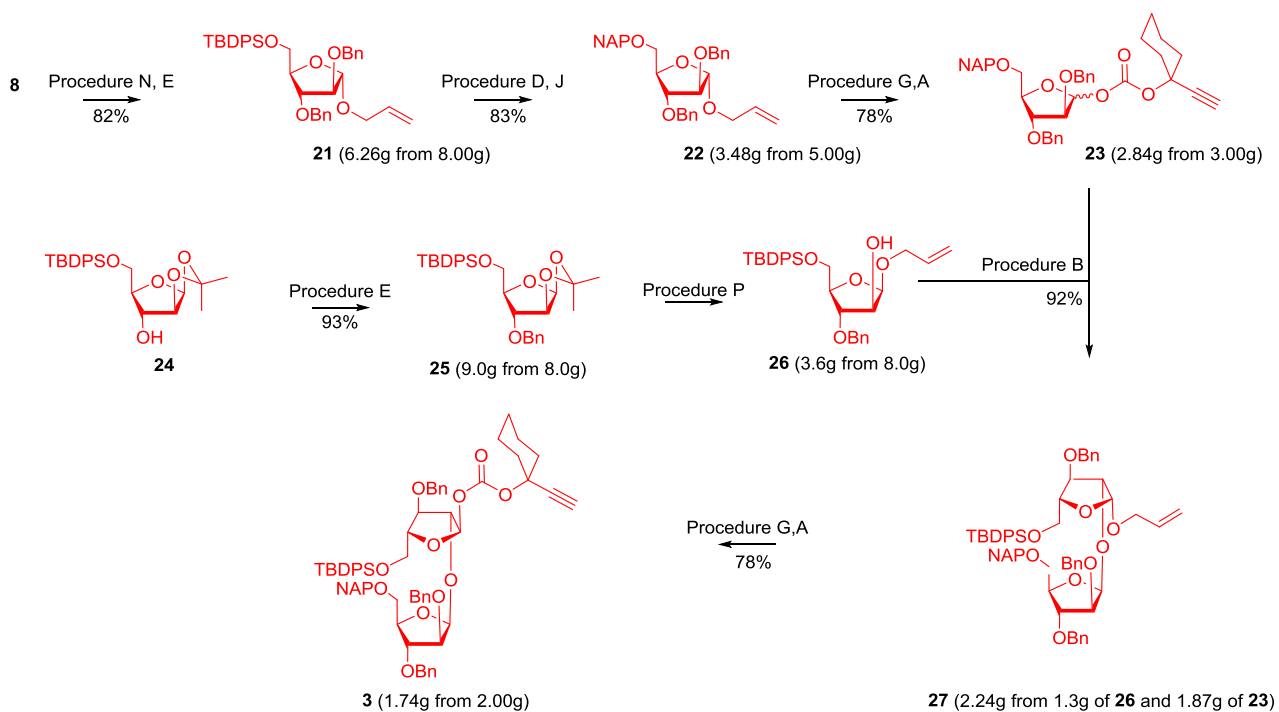

### Scheme 4

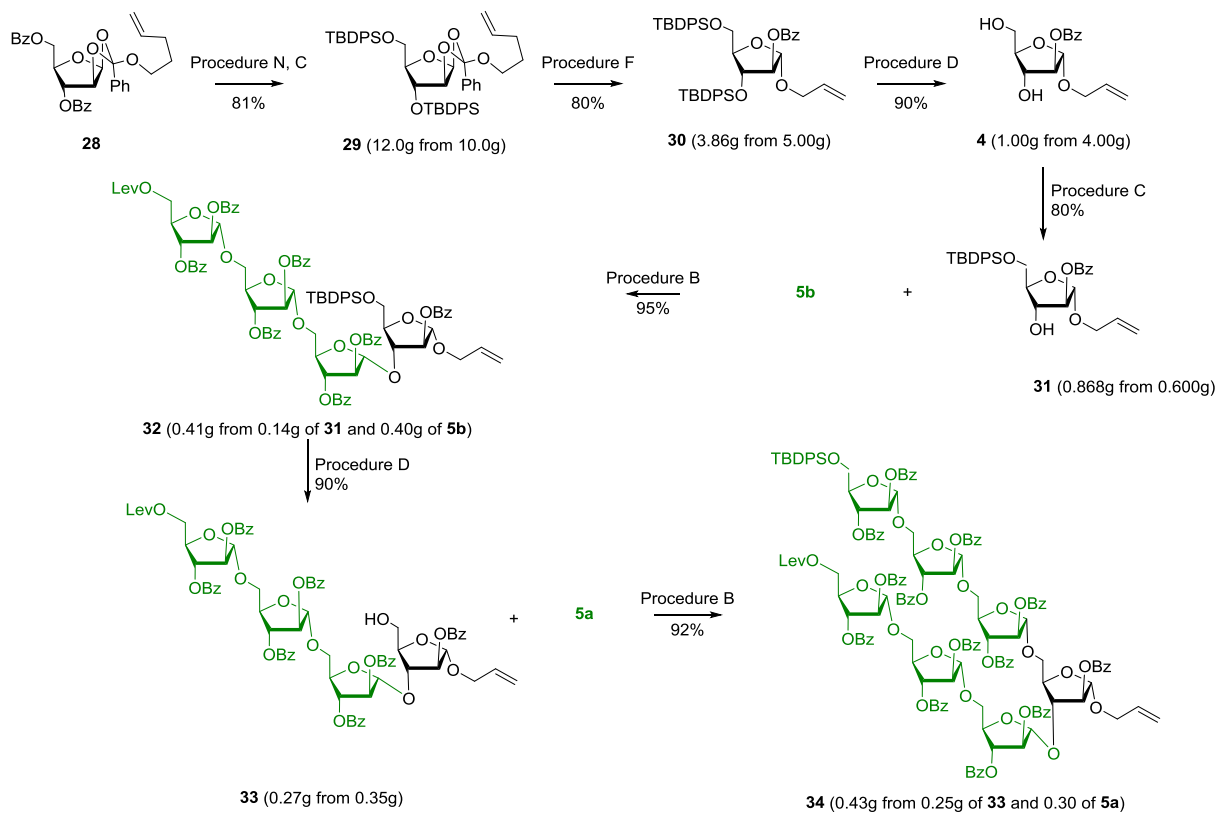

### Scheme 5

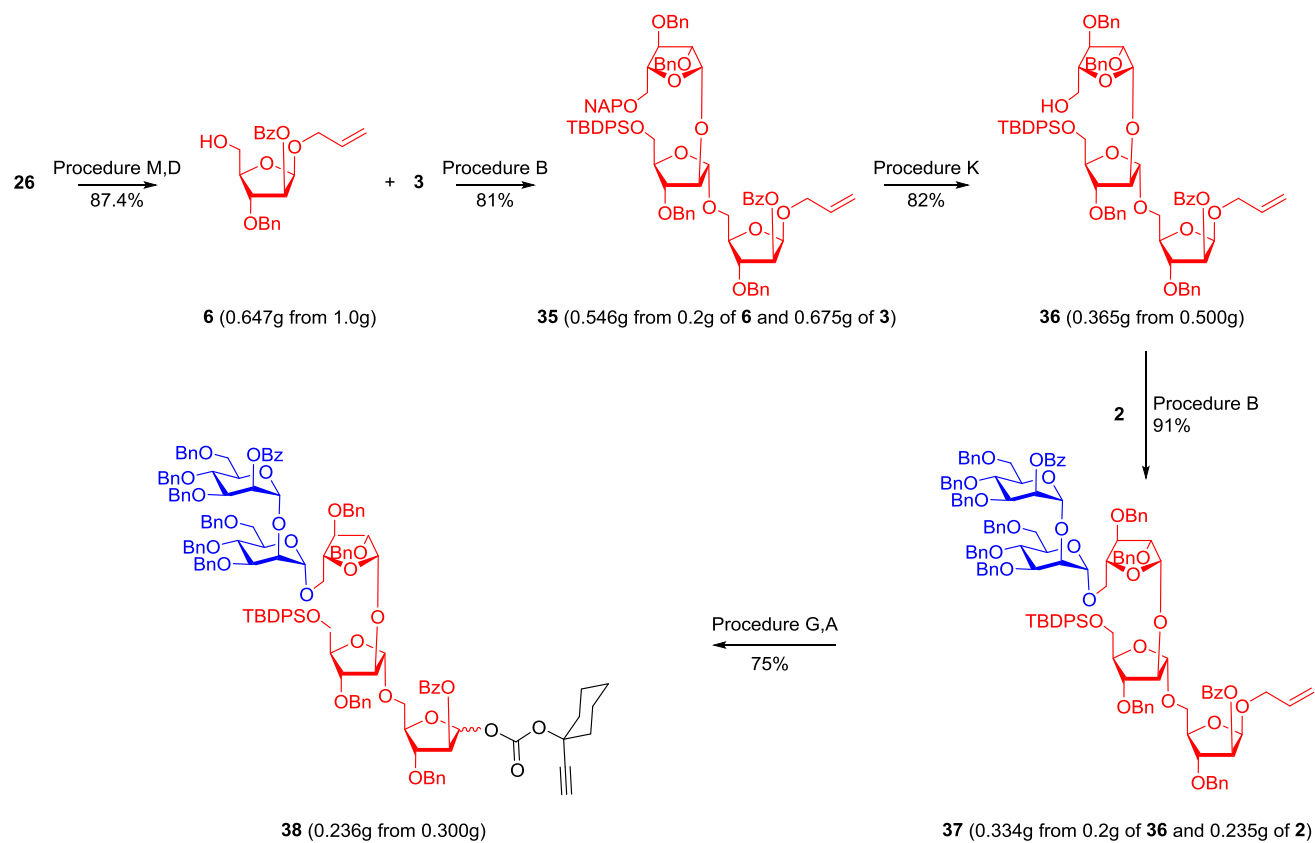

## Scheme 6

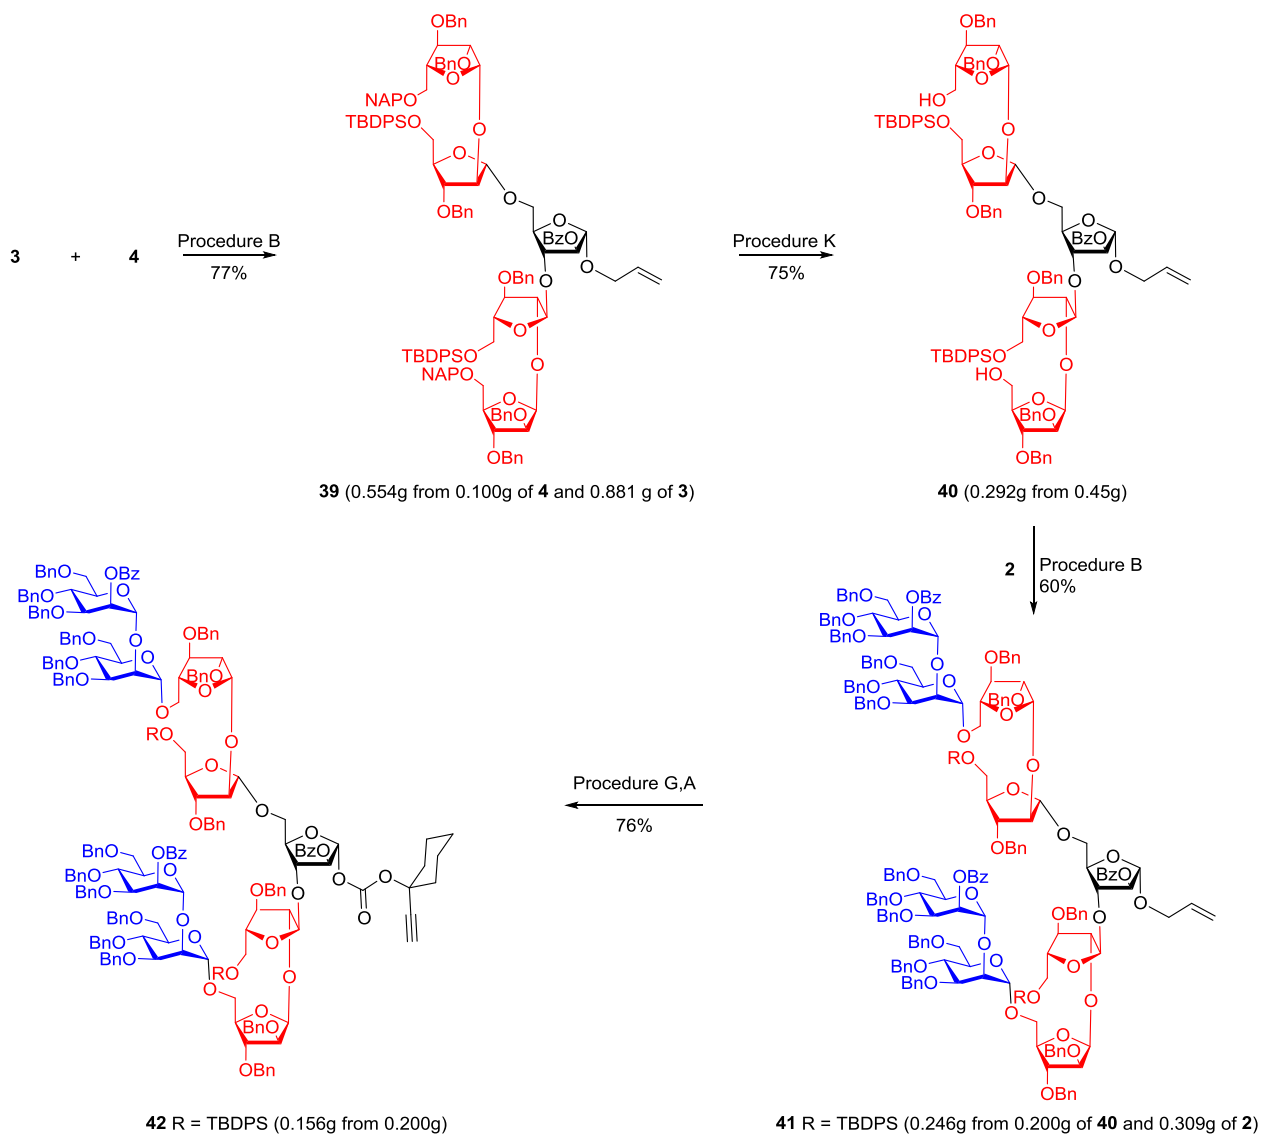

# Scheme 7

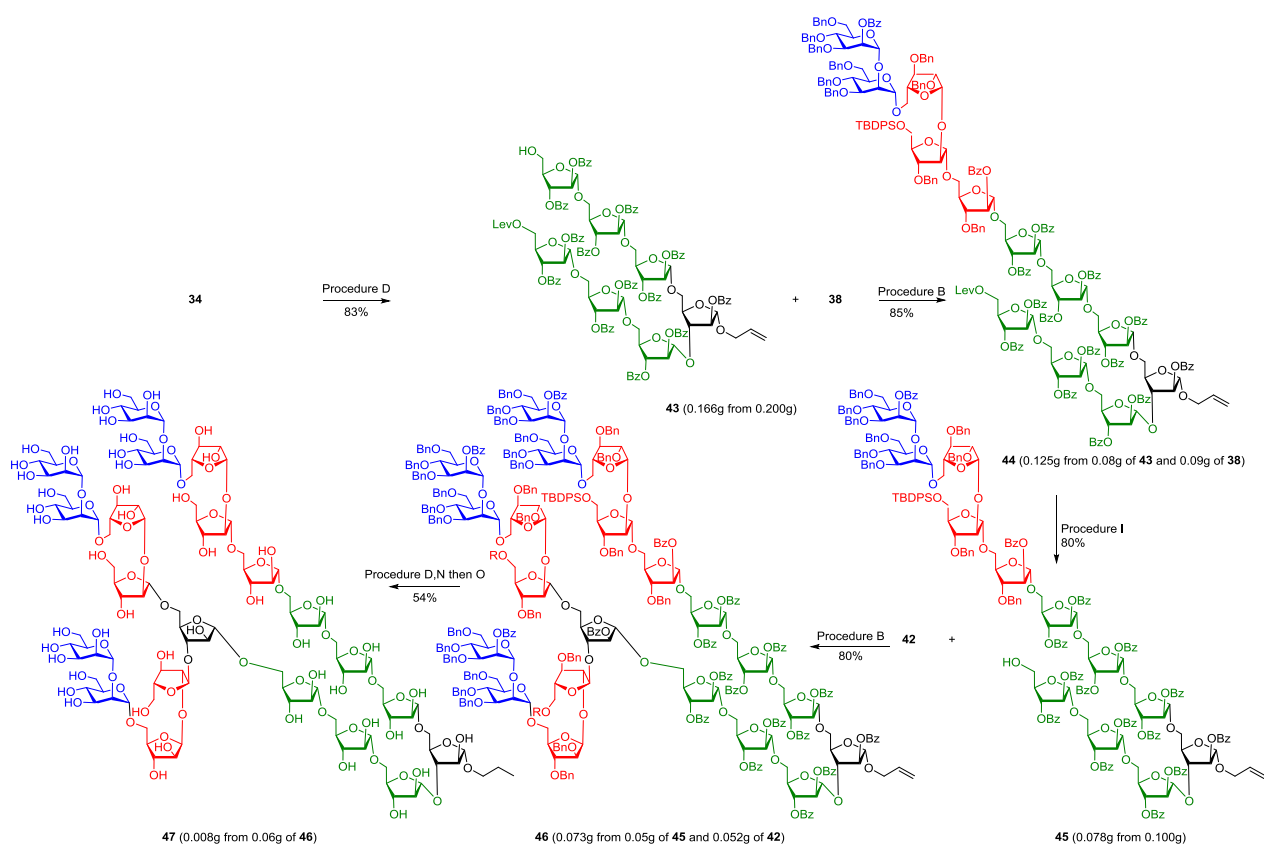

## Compound Characterization Data

**Allyl 2,3-di-O-benzoyl-5-O-<sup>t</sup>-butyldiphenylsilyl- $\alpha$ -D-arabinofuranoside (8):** Yield: (76% over two steps from 7);  $[\alpha]_D^{25} = -17.5$  ( $c = 1.0$ ,  $\text{CHCl}_3$ );  $^1\text{H NMR}$  (399.78 MHz,  $\text{CDCl}_3$ ):  $\delta$  1.05 (s, 9H), 4.01 (d,  $J = 4.8$  Hz, 2H), 4.11 (ddt,  $J = 13.1, 6.1, 1.3$  Hz, 1H), 4.29 (ddt,  $J = 13.1, 5.0, 1.5$  Hz, 1H), 4.40 (q,  $J = 4.7$  Hz, 1H), 5.20 – 5.24 (m, 1H), 5.26 (s, 1H), 5.37 (dq,  $J = 17.1, 1.6$  Hz, 1H), 5.49 (d,  $J = 1.5$  Hz, 1H), 5.62 (dd,  $J = 5.2, 1.4$  Hz, 1H), 5.90 – 6.02 (m, 1H), 7.30 – 7.35 (m, 4H), 7.35 – 7.41 (m, 4H), 7.42 – 7.48 (m, 2H), 7.52 – 7.61 (m, 2H), 7.71 (ddd,  $J = 7.8, 3.0, 1.5$  Hz, 4H), 7.96 – 8.01 (m, 2H), 8.04 – 8.08 (m, 2H);  $^{13}\text{C NMR}$  (100.53 MHz,  $\text{CDCl}_3$ ):  $\delta$  19.4, 26.9(3C), 63.7, 68.0, 77.6, 82.6, 83.1(2C), 105.1, 117.5, 127.8(3C), 128.5(3C), 129.4, 129.6, 129.8(2C), 130.1(3C), 133.3, 133.4(3C), 134.0, 135.8(6C), 165.6, 165.8; IR ( $\text{CHCl}_3$ ): 3439, 3029, 2930, 1599, 1454, 1214, 701  $\text{cm}^{-1}$ ; HRMS (TOF)  $m/z$   $[\text{M} + \text{Na}]^+$  calcd for  $\text{C}_{38}\text{H}_{40}\text{O}_7\text{NaSi}$ , 659.2441, found 659.2445.

**Allyl 2,3-di-O-benzoyl- $\alpha$ -D-arabinofuranoside (9):** Yield: (93%);  $[\alpha]_D^{25} = -36.4$  ( $c = 1.0$ ,  $\text{CHCl}_3$ );  $^1\text{H NMR}$  (399.78 MHz,  $\text{CDCl}_3$ ):  $\delta$  2.69 (s, 1H), 4.03 (d,  $J = 12.9$  Hz, 2H), 4.11 (ddt,  $J = 13.1, 5.9, 1.3$  Hz, 1H), 4.29 (ddt,  $J = 13.1, 4.9, 1.5$  Hz, 1H), 4.36 (q,  $J = 4.1$  Hz, 1H), 5.21 (dd,  $J = 10.4, 1.5$  Hz, 1H), 5.30 (s, 1H), 5.37 (dq,  $J = 17.2, 1.6$  Hz, 1H), 5.43 – 5.50 (m, 1H), 5.57 (d,  $J = 1.3$  Hz, 1H), 5.88 – 6.00 (m, 1H), 7.43 (td,  $J = 7.7, 4.5$  Hz, 4H), 7.52 – 7.62 (m, 2H), 7.87 – 8.17 (m, 4H);  $^{13}\text{C NMR}$  (100.53 MHz,  $\text{CDCl}_3$ ):  $\delta$  62.3, 67.9, 77.8, 82.0, 83.8(2C), 104.7, 117.4, 128.5, 128.5(2C), 129.1, 129.2, 129.9 (2C), 129.9(2C), 133.5, 133.6, 133.7, 165.4, 166.2; IR ( $\text{CHCl}_3$ ): 3437, 3068, 2927, 1599, 1452, 1262, 1106, 709  $\text{cm}^{-1}$ ; HRMS (TOF)  $m/z$   $[\text{M} + \text{Na}]^+$  calcd. for  $\text{C}_{22}\text{H}_{22}\text{O}_7\text{Na}$ , 421.1263, found 421.1265.

**Allyl 2,3-di-O-benzoyl-5-O-(2,3-di-O-benzoyl-5-O-<sup>t</sup>-butyldiphenylsilyl- $\alpha$ -D-arabinofuranosyl)- $\alpha$ -D-arabinofuranoside (13):** Yield: (95%);  $[\alpha]_D^{25} = -5.4$  ( $c = 1.0$ ,  $\text{CHCl}_3$ );  $^1\text{H NMR}$  (399.78MHz,  $\text{CDCl}_3$ ):  $\delta$  1.04 (s, 9H), 3.97 (dd,  $J = 11.2, 2.9$  Hz, 1H), 4.02 (dd,  $J = 4.4, 1.8$  Hz, 2H), 4.11 (ddt,  $J = 13.2, 5.9, 1.3$  Hz, 1H), 4.23 (dd,  $J = 11.2, 4.6$  Hz, 1H), 4.30 (ddt,  $J = 13.2, 4.9, 1.5$  Hz, 1H), 4.51 – 4.59 (m, 2H), 5.20 (dd,  $J = 10.4, 1.5$  Hz, 1H), 5.30 (s, 1H), 5.36 (dq,  $J = 17.3, 1.6$  Hz, 1H), 5.41 (s, 1H), 5.58 (d,  $J = 1.2$  Hz, 1H), 5.61 (d,  $J = 1.2$





5.67 (m, 4H), 5.93 (dddd,  $J = 17.2, 10.6, 5.9, 4.9$  Hz, 1H), 7.25 – 7.40 (m, 17H), 7.41 – 7.57 (m, 7H), 7.70 (ddd,  $J = 7.9, 4.2, 1.7$  Hz, 4H), 7.89 – 8.08 (m, 12H);  $^{13}\text{C}$  NMR (100.53 MHz,  $\text{CDCl}_3$ ):  $\delta$  19.4, 26.9(3C), 63.5, 66.0, 66.0, 67.9, 77.4(3C), 81.6, 82.0(2C), 82.2, 82.3, 83.3(2C), 104.9, 105.9, 106.1, 117.4, 127.8(3C), 128.3(2C), 128.4 (2C), 128.4(2C), 128.5(2C), 128.5(2C), 128.6(2C), 129.1, 129.2, 129.3, 129.3, 129.4(2C), 129.7(2C), 129.9(4C), 129.9(4C), 130.0(2C), 130.0(2C), 133.1, 133.3, 133.3, 133.4(2C), 133.4, 133.5, 133.5, 133.9, 135.7(2C), 135.7(2C), 165.2, 165.3, 165.5, 165.6, 165.7, 165.8; IR ( $\text{CHCl}_3$ ): 3468, 3049, 2938, 1601, 1450, 1230, 1109, 697  $\text{cm}^{-1}$ ; HRMS (TOF)  $m/z$   $[\text{M} + \text{Na}]^+$  calcd for  $\text{C}_{76}\text{H}_{72}\text{O}_{19}\text{NaSi}$ , 1339.4334, found 1339.4347.

**Allyl 2,3-di-O-benzoyl-5-O-(2,3-di-O-benzoyl-5-O-(2,3-di-O-benzoyl-5-O-(4-oxopentanoyl)- $\alpha$ -D-arabinofuranosyl)- $\alpha$ -D-arabinofuranosyl)- $\alpha$ -D-arabinofuranoside**

(15b): Yield: (88% over two steps);  $[\alpha]_{\text{D}}^{25} = 0.1$  ( $c = 1.0$ ,  $\text{CHCl}_3$ );  $^1\text{H}$  NMR (399.78MHz,  $\text{CDCl}_3$ ):  $\delta$  2.12 (s, 3H), 2.55 – 2.61 (m, 2H), 2.67 – 2.73 (m, 2H), 3.95 (ddd,  $J = 13.8, 11.3, 2.8$  Hz, 2H), 4.09 (ddt,  $J = 13.2, 6.0, 1.4$  Hz, 1H), 4.21 (dt,  $J = 11.0, 4.8$  Hz, 2H), 4.26 (dt,  $J = 4.9, 1.6$  Hz, 1H), 4.30 (dt,  $J = 4.9, 1.6$  Hz, 1H), 4.40 (dd,  $J = 11.5, 5.0$  Hz, 1H), 4.47 (td,  $J = 4.6, 2.9$  Hz, 2H), 4.54 – 4.61 (m, 1H), 4.63 (dt,  $J = 5.8, 2.8$  Hz, 1H), 5.20 (dq,  $J = 10.5, 1.4$  Hz, 1H), 5.28 (s, 1H), 5.35 (dq,  $J = 17.2, 1.7$  Hz, 1H), 5.39 – 5.42 (m, 2H), 5.45 (s, 1H), 5.56 (d,  $J = 1.3$  Hz, 1H), 5.60 (d,  $J = 1.1$  Hz, 1H), 5.62 – 5.67 (m, 2H), 5.94 (dddd,  $J = 17.1, 10.6, 5.9, 4.9$  Hz, 1H), 7.27 (t,  $J = 7.7$  Hz, 4H), 7.36 – 7.47 (m, 10H), 7.51 (tdd,  $J = 8.3, 3.5, 2.2$  Hz, 2H), 7.58 (dtt,  $J = 10.2, 7.0, 1.3$  Hz, 2H), 7.89 – 7.94 (m, 4H), 7.99 – 8.09 (m, 8H);  $^{13}\text{C}$  NMR (100.53 MHz,  $\text{CDCl}_3$ ):  $\delta$  27.9, 29.9, 40.0, 63.7, 66.0, 66.2, 67.8, 77.4(3C), 77.7, 81.2, 81.5, 81.7, 82.0(2C), 82.1, 104.9, 105.8, 106.0, 117.4, 128.4(2C), 128.4(2C), 128.5(2C), 128.6(4C), 128.6(2C), 129.0, 129.1(2C), 129.2, 129.2, 129.3, 129.8(2C), 129.9(6C), 129.9(2C), 130.0(2C), 133.3, 133.3, 133.5(2C), 133.7, 133.8, 165.1, 165.2, 165.5, 165.7(2C), 165.8, 172.5, 206.3; IR ( $\text{CHCl}_3$ ): 3462, 3051, 2939, 1767, 1599, 1451, 1234, 1110, 697  $\text{cm}^{-1}$ ; HRMS (TOF)  $m/z$   $[\text{M} + \text{Na}]^+$  calcd for  $\text{C}_{65}\text{H}_{60}\text{O}_{21}\text{Na}$ , 1199.3524, found 1199.3525.

**Allyl 2-O-benzoyl-3,4,6-tri-O-benzyl- $\alpha$ -D-mannopyranoside (17):** Yield: (86%);  $[\alpha]_{\text{D}}^{25} = -8.3$  ( $c = 1.0$ ,  $\text{CHCl}_3$ );  $^1\text{H}$  NMR (399.78MHz,  $\text{CDCl}_3$ ):  $\delta$  3.75 – 3.82 (m, 1H), 3.86 – 3.93 (m, 2H), 4.02 (ddt,  $J = 12.8, 6.0, 1.3$  Hz, 1H), 4.06 – 4.16 (m, 2H), 4.20 (ddt,  $J = 12.8, 5.1, 1.5$  Hz,

1H), 4.51 – 4.60 (m, 3H), 4.74 (d,  $J = 12.0$  Hz, 1H), 4.80 (d,  $J = 11.2$  Hz, 1H), 4.87 (d,  $J = 10.7$  Hz, 1H), 5.02 (d,  $J = 1.9$  Hz, 1H), 5.20 (dq,  $J = 10.6, 1.3$  Hz, 1H), 5.28 (dq,  $J = 17.0, 1.6$  Hz, 1H), 5.64 (dd,  $J = 2.8, 2.1$  Hz, 1H), 5.84 – 5.95 (m, 1H), 7.17 – 7.20 (m, 2H), 7.22 – 7.25 (m, 3H), 7.26 – 7.27 (m, 2H), 7.28 – 7.29 (m, 1H), 7.31 (dq,  $J = 3.3, 1.4$  Hz, 3H), 7.32 – 7.34 (m, 1H), 7.34 – 7.40 (m, 5H), 7.55 (ddt,  $J = 8.7, 7.0, 1.3$  Hz, 1H), 8.04 – 8.10 (m, 2H);  $^{13}\text{C}$  NMR (100.53 MHz,  $\text{CDCl}_3$ ):  $\delta$  68.4, 69.2(2C), 71.7, 71.8, 73.6, 74.5, 75.5, 78.4(2C), 97.1, 118.0, 127.7(3C), 127.7, 127.8, 128.2(3C), 128.4(2C), 128.5(3C), 128.5, 128.5, 130.0, 130.1(3C), 133.3, 133.6, 138.2, 138.5, 138.6, 165.9; IR ( $\text{CHCl}_3$ ): 3460, 3030, 2920, 1600, 1453, 1203, 1058, 696  $\text{cm}^{-1}$ ; HRMS (TOF)  $m/z$   $[\text{M} + \text{Na}]^+$  calcd for  $\text{C}_{37}\text{H}_{38}\text{O}_7\text{Na}$ , 617.2515, found 617.2509.

**Allyl 3,4,6-tri-O-benzyl- $\alpha$ -D-mannopyranoside (18):** Yield: (90%);  $[\alpha]_{\text{D}}^{25} = 57.0$  ( $c = 1.0$ ,  $\text{CHCl}_3$ );  $^1\text{H}$  NMR (399.78MHz,  $\text{CDCl}_3$ ):  $\delta$  2.54 (s, 1H), 3.67 – 3.82 (m, 3H), 3.82 – 3.93 (m, 2H), 3.98 (dd,  $J = 12.9, 6.1$  Hz, 1H), 4.05 (s, 1H), 4.17 (dd,  $J = 12.9, 5.1$  Hz, 1H), 4.51 (t,  $J = 11.8$  Hz, 2H), 4.62 – 4.74 (m, 3H), 4.82 (d,  $J = 10.8$  Hz, 1H), 4.95 (d,  $J = 1.3$  Hz, 1H), 5.14 – 5.20 (m, 1H), 5.25 (dd,  $J = 17.2, 1.5$  Hz, 1H), 5.87 (ddt,  $J = 16.6, 10.6, 5.6$  Hz, 1H), 7.17 (dd,  $J = 5.0, 2.6$  Hz, 2H), 7.31 (ddd,  $J = 16.4, 12.1, 6.9$  Hz, 13H);  $^{13}\text{C}$  NMR (100.53 MHz,  $\text{CDCl}_3$ ):  $\delta$  68.1, 68.5, 69.02, 71.2, 72.1, 73.5, 74.4, 75.3, 80.3(2C), 98.5, 117.6, 127.7, 127.8, 127.9(2C), 128.0(2C), 128.0, 128.0, 128.4(2C), 128.5(2C), 128.6(2C), 133.8, 138.0, 138.3, 138.4; IR ( $\text{CHCl}_3$ ): 3460, 3030, 2920, 1600, 1453, 1203, 1058, 696  $\text{cm}^{-1}$ ; HRMS (TOF)  $m/z$   $[\text{M} + \text{Na}]^+$  calcd for  $\text{C}_{30}\text{H}_{34}\text{O}_6\text{Na}$ , 513.2253, found 513.2261.

**Allyl 2-O-(2-O-benzoyl-3,4,6-tri-O-benzyl- $\alpha$ -D-mannopyranosyl)-3,4,6-tri-O-benzyl- $\alpha$ -D-mannopyranoside (20):** Yield: (93%);  $[\alpha]_{\text{D}}^{25} = 2.8$  ( $c = 1.0$ ,  $\text{CHCl}_3$ );  $^1\text{H}$  NMR (399.78 MHz,  $\text{CDCl}_3$ ):  $\delta$  3.69 – 3.80 (m, 4H), 3.87 (dd,  $J = 11.4, 7.0$  Hz, 3H), 3.96 (dd,  $J = 9.2, 2.1$  Hz, 1H), 4.00 – 4.06 (m, 3 H), 4.11 (dt,  $J = 8.4, 5.3$  Hz, 2H), 4.42 – 4.51 (m, 2H), 4.55 (dd,  $J = 11.7, 6.1$  Hz, 3H), 4.64 – 4.79 (m, 5H), 4.86 (dd,  $J = 10.8, 5.9$  Hz, 2H), 4.95 (s, 1H), 5.13 (d,  $J = 10.4$  Hz, 1H), 5.20 (t,  $J = 8.6$  Hz, 2H), 5.78 (m, 1H), 5.80 – 5.91 (m, 1H), 7.14 – 7.22 (m, 11H), 7.23 – 7.29 (m, 12H), 7.35 (dq,  $J = 12.4, 7.1, 6.6$  Hz, 9H), 7.55 (t,  $J = 7.4$  Hz, 1H), 8.07 (d,  $J = 8.1$  Hz, 2H);  $^{13}\text{C}$  NMR (100.53 MHz,  $\text{CDCl}_3$ ):  $\delta$  68.0, 69.2, 69.3, 69.4, 71.8, 72.0, 72.1,

72.3, 73.4, 73.5, 74.5, 74.8, 75.2, 75.3, 75.3, 78.3, 79.9(2C), 98.0, 99.7, 117.3, 127.5, 127.6, 127.6(7C), 127.7, 128.0(2C), 128.2(2C), 128.2(2C), 128.3(2C), 128.4(2C), 128.4(4C), 128.4(4C), 128.5(2C), 130.1(3C), 130.1, 133.1, 133.9, 138.2, 138.4, 138.5(2C), 138.6, 138.6, 165.5; IR (CHCl<sub>3</sub>): 3455, 3041, 2931, 1599, 1453, 1211, 1058, 697 cm<sup>-1</sup>; HRMS (TOF) m/z [M + Na]<sup>+</sup> calcd for C<sub>64</sub>H<sub>66</sub>O<sub>12</sub>Na, 1049.4452, found 1049.4449.

**Allyl 2,3-di-O-benzyl-5-O-<sup>t</sup>butyldiphenylsilyl- $\alpha$ -D-arabinofuranoside (21):** Yield: (81% over two steps); [ $\alpha$ ]<sub>D</sub><sup>25</sup> = 37.9 (*c* = 1.0, CHCl<sub>3</sub>); <sup>1</sup>H NMR (399.78 MHz, CDCl<sub>3</sub>):  $\delta$  0.97 (s, 9H), 3.71 – 3.77 (m, 2H), 3.90 – 3.95 (m, 1H), 3.95 – 3.97 (m, 1H), 3.99 (dd, *J* = 2.9, 1.3 Hz, 1H), 4.08 – 4.11 (m, 1H), 4.12 – 4.18 (m, 1H), 4.38 – 4.51 (m, 4H), 5.02 (d, *J* = 1.0 Hz, 1H), 5.11 (dq, *J* = 10.3, 1.3 Hz, 1H), 5.23 (dq, *J* = 17.3, 1.7 Hz, 1H), 5.79 – 5.92 (m, 1H), 7.15 – 7.22 (m, 6H), 7.23 – 7.29 (m, 8H), 7.30 – 7.36 (m, 2H), 7.60 (td, *J* = 7.4, 6.8, 1.4 Hz, 4H); <sup>13</sup>C NMR (100.53 MHz, CDCl<sub>3</sub>):  $\delta$  19.5, 27.0(3C), 64.0, 68.3, 72.0, 72.2, 82.5, 83.4(2C), 88.5, 105.4, 117.4, 127.7(3C), 127.8(3C), 127.9(2C), 127.9(2C), 128.5(2C), 128.5(2C), 129.8(2C), 133.6, 134.5, 135.8(2C), 135.8(2C), 137.8, 138.1; IR (CHCl<sub>3</sub>): 3034, 2928, 1458, 1230, 1103, 698 cm<sup>-1</sup>; HRMS (TOF) m/z [M + Na]<sup>+</sup> calcd for C<sub>38</sub>H<sub>44</sub>O<sub>5</sub>NaSi, 631.2855, found 631.2855.

**Allyl 2,3-di-O-benzyl-5-O-(naphthalen-1-yl methyl)- $\alpha$ -D-arabinofuranoside (22):** Yield: (81% over two steps); [ $\alpha$ ]<sub>D</sub><sup>25</sup> = 43.4 (*c* = 1.0, CHCl<sub>3</sub>); <sup>1</sup>H NMR (399.78 MHz, CDCl<sub>3</sub>):  $\delta$  3.65 (qd, *J* = 10.7, 4.5 Hz, 2H), 3.94 (dd, *J* = 6.7, 3.1 Hz, 1H), 3.97 – 4.04 (m, 1H), 4.06 (dd, *J* = 3.1, 1.2 Hz, 1H), 4.21 – 4.28 (m, 2H), 4.47 (dd, *J* = 11.9, 3.3 Hz, 2H), 4.55 (d, *J* = 11.7 Hz, 2H), 4.67 – 4.78 (m, 2H), 5.11 (s, 1H), 5.16 – 5.21 (m, 1H), 5.30 (dq, *J* = 17.2, 1.6 Hz, 1H), 5.92 (dddd, *J* = 16.9, 10.9, 6.2, 5.0 Hz, 1H), 7.18 – 7.25 (m, 5H), 7.27 – 7.34 (m, 5H), 7.41 – 7.50 (m, 3H), 7.74 – 7.84 (m, 4H); <sup>13</sup>C NMR (100.53 MHz, CDCl<sub>3</sub>):  $\delta$  68.2, 69.9, 72.1, 72.3, 73.6, 80.9, 83.7(2C), 88.5, 105.5, 117.4, 126.0(2C), 126.2, 126.7, 127.8(2C), 127.9(2C), 128.0, 128.0(2C), 128.3, 128.4(2C), 128.5(2C), 133.1, 133.4, 134.4, 135.7, 137.7, 138.0; IR (CHCl<sub>3</sub>): 3029, 2917, 1455, 1213, 698 cm<sup>-1</sup>; HRMS (TOF) m/z [M + Na]<sup>+</sup> calcd for C<sub>33</sub>H<sub>34</sub>O<sub>5</sub>Na, 533.2303, found 533.2306.

**Allyl 3-O-benzyl-5-O<sup>t</sup>butyldiphenylsilyl-β-D-arabinofuranoside (26):** Yield: (45%);  $[\alpha]_{\text{D}}^{25} = -23.8$  ( $c = 1.0$ ,  $\text{CHCl}_3$ );  $^1\text{H NMR}$  (399.78 MHz,  $\text{CDCl}_3$ ):  $\delta$  1.06 (s, 9H), 2.63 (d,  $J = 9.5$  Hz, 1H), 3.75 (m, 2H), 3.98 (q,  $J = 6.2$  Hz, 2H), 4.08 (q,  $J = 5.5$  Hz, 1H), 4.18 (dd,  $J = 12.8, 5.2$  Hz, 1H), 4.27 (dt,  $J = 9.8, 5.3$  Hz, 1H), 4.62 (d,  $J = 11.8$  Hz, 1H), 4.76 (d,  $J = 11.8$  Hz, 1H), 5.01 (d,  $J = 4.7$  Hz, 1H), 5.13 (d,  $J = 10.4$  Hz, 1H), 5.18 (d,  $J = 17.2$  Hz, 1H), 5.80 (ddt,  $J = 16.4, 10.6, 5.7$  Hz, 1H), 7.28 (dd,  $J = 14.5, 4.1$  Hz, 5H), 7.34 – 7.44 (m, 6H), 7.68 (d,  $J = 7.0$  Hz, 4H);  $^{13}\text{C NMR}$  (100.53 MHz,  $\text{CDCl}_3$ ):  $\delta$  19.4, 27.0(3C), 65.5, 68.8, 72.0, 78.3, 82.6, 84.7(2C), 100.7, 117.7, 127.7, 127.7(2C), 127.8(2C), 128.5, 129.8, 129.8, 133.4, 133.5, 133.8, 135.7(6C), 138.2; IR ( $\text{CHCl}_3$ ): 3451, 3030, 2929, 1455, 1213, 697  $\text{cm}^{-1}$ ; HRMS (TOF)  $m/z$   $[\text{M} + \text{Na}]^+$  calcd for  $\text{C}_{31}\text{H}_{38}\text{O}_5\text{NaSi}$ , 541.2386, found 541.2390.

**Allyl 2-O-(2,3-di-O-benzyl-5-O-(naphthalen-1-yl methyl)-β-D-arabinofuranosyl)-3-O-benzyl-5-O<sup>t</sup>butyldiphenylsilyl-β-D-arabinofuranoside (27):** Yield: (92%)  $[\alpha]_{\text{D}}^{25} = -69.7$  ( $c = 1.0$ ,  $\text{CHCl}_3$ );  $^1\text{H NMR}$  (399.78 MHz,  $\text{CDCl}_3$ ):  $\delta$  1.04 (s, 9H), 3.58 (dd,  $J = 9.7, 4.5$  Hz, 1H), 3.65 (td,  $J = 8.3, 7.0, 2.5$  Hz, 1H), 3.71 – 3.76 (m, 2H), 3.90 (dd,  $J = 12.1, 6.0$  Hz, 1H), 4.06 – 4.22 (m, 5H), 4.27 (td,  $J = 7.1, 6.2, 3.1$  Hz, 1H), 4.41 (dd,  $J = 12.3, 2.2$  Hz, 1H), 4.44 – 4.51 (m, 2H), 4.53 – 4.63 (m, 4H), 4.70 (dd,  $J = 11.9, 2.4$  Hz, 1H), 4.80 (dd,  $J = 11.4, 2.2$  Hz, 1H), 5.05 (d,  $J = 10.3$  Hz, 1H), 5.12 – 5.19 (m, 3H), 5.69 – 5.81 (m, 1H), 7.23 (s, 10H), 7.29 – 7.38 (m, 11H), 7.39 (d,  $J = 2.0$  Hz, 1H), 7.41 – 7.45 (m, 2H), 7.59 (s, 1H), 7.63 – 7.69 (m, 4H), 7.71 – 7.80 (m, 3H);  $^{13}\text{C NMR}$  (100.53 MHz,  $\text{CDCl}_3$ ):  $\delta$  19.4, 27.0(3C), 66.0, 68.2, 71.8, 72.3, 72.4, 72.8, 73.3, 79.5, 81.0(2C), 82.3, 82.9, 83.2, 84.0, 98.7, 99.0, 117.7, 125.8, 125.8, 126.1, 126.4, 127.6, 127.7(2C), 127.7, 127.8, 127.8(4C), 128.0, 128.2(2C), 128.4(2C), 128.4(2C), 128.5(2C), 129.8(2C), 133.1, 133.4, 133.5(2C), 134.0(2C), 135.7(6C), 135.8, 138.1, 138.3, 138.4; IR ( $\text{CHCl}_3$ ): 3032, 2931, 1458, 1230, 1103, 698  $\text{cm}^{-1}$ ; HRMS (TOF)  $m/z$   $[\text{M} + \text{Na}]^+$  calcd for  $\text{C}_{61}\text{H}_{66}\text{O}_9\text{NaSi}$ , 993.4374, found 993.4379.

**Allyl 2-O-benzoyl-α-D-arabinofuranoside (4):** Yield: (90%);  $[\alpha]_{\text{D}}^{25} = 99.3$  ( $c = 1.0$ ,  $\text{CHCl}_3$ );  $^1\text{H NMR}$  (399.78 MHz,  $\text{CDCl}_3$ ):  $\delta$  2.24 (s, 1H), 3.51 (s, 1H), 3.80 (d,  $J = 11.8$  Hz, 1H), 3.90 – 3.98 (m, 1H), 4.08 (ddt,  $J = 12.9, 6.2, 1.3$  Hz, 1H), 4.22 (dd,  $J = 6.1, 2.5$  Hz, 2H), 4.29 (ddt,  $J = 12.9, 5.1, 1.4$  Hz, 1H), 5.13 (d,  $J = 1.5$  Hz, 1H), 5.23 (dd,  $J = 10.4, 1.3$  Hz, 1H), 5.30 (s,

1H), 5.34 (dq,  $J = 17.2, 1.6$  Hz, 1H), 5.87 – 6.01 (m, 1H), 7.44 (t,  $J = 7.7$  Hz, 2H), 7.59 (t,  $J = 7.4$  Hz, 1H), 7.99 – 8.03 (m, 2H);  $^{13}\text{C}$  NMR (100.53 MHz,  $\text{CDCl}_3$ ):  $\delta$  62.0, 68.4, 76.6, 84.2(2C), 86.3, 104.6, 118.0, 128.7, 129.1, 129.9(2C), 133.7, 133.8, 166.8; IR ( $\text{CHCl}_3$ ): 3427, 3074, 2929, 1601, 1451, 1203, 1105, 712  $\text{cm}^{-1}$ ; HRMS (TOF)  $m/z$   $[\text{M} + \text{Na}]^+$  calcd for  $\text{C}_{15}\text{H}_{18}\text{O}_6\text{Na}$ , 317.1007, found 317.1006.

**Allyl 2-O-benzoyl-5-O-<sup>t</sup>butyldiphenylsilyl- $\alpha$ -D-arabinofuranoside (31):** Yield: (30%);  $[\alpha]_{\text{D}}^{25} = 47.5$  ( $c = 1.0$ ,  $\text{CHCl}_3$ );  $^1\text{H}$  NMR (399.78 MHz,  $\text{CDCl}_3$ ):  $\delta$  1.04 (s, 9H), 3.09 (d,  $J = 4.1$  Hz, 1H), 3.89 (d,  $J = 4.2$  Hz, 2H), 4.07 (dd,  $J = 12.9, 6.2$  Hz, 1H), 4.21 – 4.31 (m, 3H), 5.14 (s, 1H), 5.22 (dd,  $J = 10.4, 1.4$  Hz, 1H), 5.28 (s, 1H), 5.33 (dt,  $J = 17.2, 1.5$  Hz, 1H), 5.94 (dddd,  $J = 16.7, 10.5, 6.1, 5.2$  Hz, 1H), 7.31 – 7.44 (m, 8H), 7.56 (d,  $J = 7.4$  Hz, 1H), 7.68 (dd,  $J = 7.9, 1.4$  Hz, 4H), 7.91 – 7.98 (m, 2H);  $^{13}\text{C}$  NMR (100.53 MHz,  $\text{CDCl}_3$ ):  $\delta$  19.4, 26.9(3C), 63.7, 68.3, 77.0, 84.8(2C), 85.8, 104.6, 117.9, 127.8(2C), 127.8(2C), 128.6(2C), 129.3, 129.8(2C), 129.9(2C), 133.4, 133.6, 133.9, 135.7(2C), 135.7(2C), 166.7; IR ( $\text{CHCl}_3$ ): 3435, 3027, 2924, 1599, 1454, 1213, 1102, 700  $\text{cm}^{-1}$ ; HRMS (TOF)  $m/z$   $[\text{M} + \text{Na}]^+$  calcd for  $\text{C}_{31}\text{H}_{36}\text{O}_6\text{NaSi}$ , 555.2178, found 555.2180.

**Allyl 2-O-benzoyl- 3-O-(2,3-di-O-benzoyl-5-O-(2,3-di-O-benzoyl-5-O-(2,3-di-O-benzoyl-5-O-(4-oxopentanoyl)- $\alpha$ -D-arabinofuranosyl)- $\alpha$ -D-arabinofuranosyl)- $\alpha$ -D-arabinofuranosyl)-5-O-<sup>t</sup>butyldiphenylsilyl- $\alpha$ -D-arabinofuranoside (32):** Yield: (95%);  $[\alpha]_{\text{D}}^{25} = 13.7$  ( $c = 1.0$ ,  $\text{CHCl}_3$ );  $^1\text{H}$  NMR (399.78 MHz,  $\text{CDCl}_3$ ):  $\delta$  0.99 (s, 9H), 2.11 (s, 3H), 2.58 (td,  $J = 7.2, 6.6, 2.2$  Hz, 2H), 2.67 – 2.73 (m, 2H), 3.69 (d,  $J = 10.9$  Hz, 1H), 3.89 (d,  $J = 3.7$  Hz, 2H), 3.94 (d,  $J = 10.3$  Hz, 1H), 4.11 (td,  $J = 10.9, 9.4, 4.6$  Hz, 2H), 4.19 (dd,  $J = 11.9, 3.1$  Hz, 2H), 4.25 – 4.34 (m, 2H), 4.39 (dd,  $J = 11.2, 4.5$  Hz, 1H), 4.53 – 4.62 (m, 4H), 5.18 (d,  $J = 10.4$  Hz, 1H), 5.25 (s, 1H), 5.35 (s, 1H), 5.38 – 5.41 (m, 2H), 5.42 (s, 1H), 5.44 (s, 1H), 5.57 – 5.64 (m, 5H), 5.69 (d,  $J = 4.3$  Hz, 1H), 5.95 (ddt,  $J = 16.7, 10.7, 5.4$  Hz, 1H), 7.20 – 7.24 (m, 2H), 7.25 – 7.32 (m, 6H), 7.36 (q,  $J = 7.3$  Hz, 10H), 7.43 (d,  $J = 7.4$  Hz, 2H), 7.45 – 7.51 (m, 4H), 7.52 – 7.60 (m, 3H), 7.62 – 7.66 (m, 4H), 7.83 (d,  $J = 8.2$  Hz, 2H), 7.89 (d,  $J = 8.2$  Hz, 2H), 8.01 (ddd,  $J = 26.8, 16.6, 8.0$  Hz, 10H);  $^{13}\text{C}$  NMR (100.53 MHz,  $\text{CDCl}_3$ ):  $\delta$  19.4, 26.8(3C), 27.9, 29.9, 38.0, 63.2, 63.7, 65.5, 66.1, 67.8(2C), 77.0, 77.3, 77.7, 80.1, 81.2,

81.5(2C), 81.6, 82.1, 82.9, 82.9, 83.5, 105.0, 105.2, 106.0, 106.0, 117.3, 127.7(2C), 127.8(2C), 128.3(2C), 128.4(2C), 128.4(2C), 128.6(6C), 128.6(2C), 129.0, 129.1, 129.1, 129.2, 129.2, 129.4, 129.5, 129.7, 129.8(2C), 129.8, 129.9(5C), 123.0(8C), 133.2 (2C), 133.3(2C), 133.4 (2C), 133.7, 134.2, 135.6(2C), 135.7(2C), 165.1, 165.1, 165.2, 165.6, 165.6, 165.7, 165.7, 172.5, 206.3; IR (CHCl<sub>3</sub>): 3419, 3035, 2920, 1752, 1601, 1455, 1210, 1100, 693 cm<sup>-1</sup>; HRMS (TOF) m/z [M + Na]<sup>+</sup> calcd for C<sub>93</sub>H<sub>90</sub>O<sub>26</sub>NaSi, 1674.5420, found 1674.5425.

**Allyl 2-O-benzoyl- 3-O-(2,3-di-O-benzoyl-5-O-(2,3-di-O-benzoyl-5-O-(2,3-di-O-benzoyl-5-O-(4-oxopentanoyl)- $\alpha$ -D-arabinofuranosyl)- $\alpha$ -D-arabinofuranosyl)- $\alpha$ -D-arabinofuranosyl)- $\alpha$ -D-arabinofuranoside (33):** Yield: (90%);  $[\alpha]_D^{25} = 12.3$  ( $c = 1.0$ , CHCl<sub>3</sub>); <sup>1</sup>H NMR (399.78 MHz, CDCl<sub>3</sub>):  $\delta$  2.12 (s, 3H), 2.58 (td,  $J = 7.5, 6.8, 2.6$  Hz, 2H), 2.67 – 2.72 (m, 2H), 3.82 (d,  $J = 11.4$  Hz, 1H), 3.90 – 3.99 (m, 3H), 4.06 – 4.21 (m, 3H), 4.23 – 4.33 (m, 2H), 4.35 – 4.47 (m, 3H), 4.53 – 4.62 (m, 3H), 5.15 – 5.20 (m, 1H), 5.23 (s, 1H), 5.33 (q,  $J = 1.6$  Hz, 1H), 5.36 (s, 1H), 5.38 – 5.41 (m, 2H), 5.43 (s, 1H), 5.56 (d,  $J = 4.8$  Hz, 1H), 5.59 (s, 3H), 5.63 (d,  $J = 3.6$  Hz, 2H), 5.92 (dddd,  $J = 16.7, 10.6, 6.0, 4.9$  Hz, 1H), 7.2 7 (q,  $J = 8.2$  Hz, 4H), 7.40 (tdd,  $J = 7.4, 6.2, 5.5, 2.8$  Hz, 9H), 7.43 – 7.48 (m, 4H), 7.49 – 7.55 (m, 2H), 7.55 – 7.61 (m, 2H), 7.91 (ddd,  $J = 8.4, 3.6, 1.2$  Hz, 4H), 7.98 – 8.08 (m, 10H); <sup>13</sup>C NMR (100.53 MHz, CDCl<sub>3</sub>):  $\delta$  27.9, 29.9, 38.0, 62.0, 63.7, 66.1, 66.4, 67.9, 77.2, 77.3, 77.7, 80.8, 81.2, 81.5, 81.5, 81.9, 82.0, 82.5, 83.1, 83.3(2C), 105.0, 105.6, 105.8, 106.0, 117.5, 128.4(5C), 128.6 (8C), 128.6, 129.0, 129.1(2C), 129.1, 129.2, 129.3, 129.4, 129.9(8C), 130.0(5C), 133.3, 133.4, 133.5(4C), 133.7, 133.9, 165.2, 165.3, 165.4, 165.6, 165.7, 165.7, 165.7, 172.6, 206.4; IR (CHCl<sub>3</sub>): 3426, 3030, 2929, 1741, 1599, 1455, 1210, 1100, 693 cm<sup>-1</sup>; HRMS (TOF) m/z [M + Na]<sup>+</sup> calcd for C<sub>77</sub>H<sub>72</sub>O<sub>26</sub>Na, 1435.4209, found 1435.4193.

**Allyl 2-O-benzoyl- 3-O-(2,3-di-O-benzoyl-5-O-(2,3-di-O-benzoyl-5-O-(2,3-di-O-benzoyl-5-O-(4-oxopentanoyl)- $\alpha$ -D-arabinofuranosyl)- $\alpha$ -D-arabinofuranosyl)- $\alpha$ -D-arabinofuranosyl)-5-O-(2,3-di-O-benzoyl-5-O-(2,3-di-O-benzoyl-5-O-(2,3-di-O-benzoyl-5-O-(<sup>t</sup>butyldiphenylsilyl)- $\alpha$ -D-arabinofuranosyl)- $\alpha$ -D-arabinofuranosyl)- $\alpha$ -D-arabinofuranosyl)- $\alpha$ -D-arabinofuranoside (34):** Yield: (92%);  $[\alpha]_D^{25} = 13.9$  ( $c = 1.0$ , CHCl<sub>3</sub>);

$^1\text{H}$  NMR (399.78 MHz,  $\text{CDCl}_3$ ):  $\delta$  1.01 (s, 9H), 2.10 (s, 3H), 2.57 (dd,  $J = 6.3, 1.9$  Hz, 2H), 2.65 – 2.70 (m, 2H), 3.79 – 3.92 (m, 5H), 3.95 – 3.99 (m, 2H), 4.00 – 4.09 (m, 2H), 4.14 – 4.28 (m, 5H), 4.35 – 4.44 (m, 3H), 4.46 – 4.54 (m, 3H), 4.59 (ddd,  $J = 11.8, 7.7, 3.6$  Hz, 4H), 5.14 (dd,  $J = 10.5, 1.5$  Hz, 1H), 5.23 (s, 1H), 5.29 – 5.34 (m, 3H), 5.36 (s, 1H), 5.38 (d,  $J = 5.2$  Hz, 2H), 5.41 (s, 1H), 5.45 (d,  $J = 1.5$  Hz, 1H), 5.52 (s, 1H), 5.56 (d,  $J = 1.3$  Hz, 1H), 5.58 (d,  $J = 1.2$  Hz, 2H), 5.60 (d,  $J = 1.1$  Hz, 1H), 5.62 (d,  $J = 3.5$  Hz, 5H), 5.64 (d,  $J = 5.0$  Hz, 1H), 5.69 (d,  $J = 4.6$  Hz, 1H), 5.84 – 5.95 (m, 1H), 7.22 – 7.30 (m, 11H), 7.30 – 7.35 (m, 10H), 7.36 – 7.39 (m, 10H), 7.40 – 7.43 (m, 3H), 7.43 – 7.48 (m, 6H), 7.48 – 7.52 (m, 2H), 7.55 (d,  $J = 11.7$  Hz, 2H), 7.69 (ddd,  $J = 7.9, 4.1, 1.6$  Hz, 4H), 7.84 (dd,  $J = 8.3, 1.2$  Hz, 2H), 7.86 – 7.87 (m, 2H), 7.87 – 7.89 (m, 3H), 7.91 (dd,  $J = 6.4, 1.2$  Hz, 2H), 7.94 (dd,  $J = 2.7, 1.3$  Hz, 2H), 7.96 – 7.97 (m, 5H), 7.98 – 7.99 (m, 5H), 8.00 – 8.06 (m, 6H);  $^{13}\text{C}$  NMR (100.53 MHz,  $\text{CDCl}_3$ ):  $\delta$  19.4, 26.8(3C), 27.9, 29.8, 37.9, 63.5, 63.7, 65.6, 65.7, 65.8, 66.0, 67.8(2C), 77.0, 77.2, 77.3, 77.3, 77.4(2C), 77.7(2C), 80.7, 81.2, 81.5(3C), 81.6(2C), 82.0, 82.2, 82.2, 82.6, 82.8, 82.9, 83.2, 105.1, 105.4, 105.8, 105.9, 105.9, 106.0, 106.0, 117.4, 127.7(7C), 128.3(2C), 128.3(2C), 128.3(2C), 128.4(2C), 128.4(3C), 128.5(3C), 128.5(3C), 128.6(2C), 129.0, 129.1, 129.1, 129.1(2C), 129.1, 129.2, 129.2, 129.3(2C), 129.3, 129.4, 129.7(2C), 129.8(2C), 129.8(9C), 129.9(12C), 129.9(5C), 130.0(2C), 133.1, 133.2, 133.2, 133.3, 133.3(5C), 133.4(3C), 133.6, 133.9, 135.7(3C), 135.7(3C), 165.1, 165.1, 165.1, 165.2, 165.2, 165.2, 165.5, 165.6, 165.6(4C), 165.7, 172.5, 206.3; IR ( $\text{CHCl}_3$ ): 3016, 2918, 1750, 1600, 1454, 1267, 1106, 708  $\text{cm}^{-1}$ ; HRMS (TOF)  $m/z$   $[\text{M} + \text{Na}]^+$  calcd for  $\text{C}_{150}\text{H}_{138}\text{O}_{44}\text{NaSi}$ , 2694.8261, found 2694.7383.

**Allyl 2-O-benzoyl-3-O-benzyl- $\beta$ -D-arabinofuranoside (6):** Yield: (87% over two steps);  $[\alpha]_{\text{D}}^{25} = -115.7$  ( $c = 1.0$ ,  $\text{CHCl}_3$ );  $^1\text{H}$  NMR (399.78 MHz,  $\text{CDCl}_3$ ):  $\delta$  2.49 (s, 1H), 3.65 (ddd,  $J = 12.1, 8.2, 4.1$  Hz, 1H), 3.79 (dt,  $J = 11.8, 2.5$  Hz, 1H), 4.00 (ddt,  $J = 12.9, 5.8, 1.3$  Hz, 1H), 4.15 – 4.21 (m, 2H), 4.58 – 4.73 (m, 3H), 5.09 (dq,  $J = 10.7, 1.2$  Hz, 1H), 5.18 (dq,  $J = 17.1, 1.5$  Hz, 1H), 5.23 (dd,  $J = 6.8, 4.9$  Hz, 1H), 5.42 (d,  $J = 4.7$  Hz, 1H), 5.68 – 5.82 (m, 1H), 7.24 – 7.35 (m, 5H), 7.43 – 7.49 (m, 2H), 7.59 (tt,  $J = 7.0, 1.3$  Hz, 1H), 8.02 – 8.08 (m, 2H);  $^{13}\text{C}$  NMR (100.53 MHz,  $\text{CDCl}_3$ ):  $\delta$  63.5, 69.8, 72.6, 79.7, 79.8, 82.2(2C), 100.0, 117.9, 127.8, 128.0, 128.6(3C), 129.4, 129.9(3C), 133.5(2C), 137.6, 166.0; IR ( $\text{CHCl}_3$ ): 3463, 3041, 2929,



1599, 1453, 1276, 1108, 704  $\text{cm}^{-1}$ ; HRMS (TOF)  $m/z$   $[\text{M} + \text{Na}]^+$  calcd for  $\text{C}_{22}\text{H}_{24}\text{O}_6\text{Na}$ , 407.1470, found 407.1465.

**Allyl 2-O-benzoyl-3-O-benzyl-5-O-(2-O-(2,3-di-O-benzyl-5-O-(naphthalen-1-yl methyl)- $\beta$ -D-arabinofuranosyl)-3-O-benzyl-5-O-<sup>t</sup>butyldiphenylsilyl- $\alpha$ -D-arabinofuranosyl)- $\beta$ -D-arabinofuranoside (35):** Yield: (81%);  $[\alpha]_{\text{D}}^{25} = -0.3$  ( $c = 1.0$ ,  $\text{CHCl}_3$ );  $^1\text{H}$  NMR (399.78 MHz,  $\text{CDCl}_3$ ):  $\delta$  1.06 (s, 9H), 3.55 – 3.63 (m, 3H), 3.77 – 3.86 (m, 2H), 3.93 (d,  $J = 15.1$  Hz, 2H), 4.07 – 4.29 (m, 7H), 4.40 – 4.51 (m, 4H), 4.52 (s, 1H), 4.57 (d,  $J = 3.2$  Hz, 2H), 4.60 – 4.69 (m, 5H), 4.97 – 5.05 (m, 2H), 5.10 (d,  $J = 4.3$  Hz, 2H), 5.22 (d,  $J = 4.6$  Hz, 1H), 5.40 (d,  $J = 4.6$  Hz, 1H), 5.72 (ddd,  $J = 14.5, 10.5, 4.5$  Hz, 1H), 7.18 – 7.22 (m, 6H), 7.24 (dd,  $J = 5.7, 3.3$  Hz, 7H), 7.27 – 7.37 (m, 12H), 7.37 (s, 2H), 7.43 (t,  $J = 3.5$  Hz, 4H), 7.53 – 7.62 (m, 2H), 7.65 – 7.73 (m, 5H), 7.74 – 7.81 (m, 2H), 8.04 (dd,  $J = 6.4, 2.1$  Hz, 2H);  $^{13}\text{C}$  NMR (100.53 MHz,  $\text{CDCl}_3$ ):  $\delta$  19.4, 27.0(3C), 64.0, 68.5, 68.9, 72.3, 72.3(2C), 72.4, 72.6, 73.3, 79.7, 79.8, 80.2, 82.3, 82.8, 83.2(2C), 83.9, 84.1, 85.8, 99.6, 100.2, 106.0, 117.1, 125.7, 125.9, 126.1, 126.4, 127.6(3C), 127.8(10C), 127.9, 128.0, 128.1(2C), 128.2, 128.4(2C), 128.4(2C), 128.5(2C), 128.6(2C), 129.6, 129.8(2C), 129.9(2C), 133.0, 133.3, 133.3, 133.5, 133.5, 133.9, 135.5, 135.7(6C), 137.8, 137.9, 138.1, 138.2, 166.0; IR ( $\text{CHCl}_3$ ): 3057, 2927, 1598, 1456, 1268, 1107, 698  $\text{cm}^{-1}$ ; HRMS (TOF)  $m/z$   $[\text{M} + \text{Na}]^+$  calcd for  $\text{C}_{80}\text{H}_{84}\text{O}_{14}\text{NaSi}$ , 1319.5527, found 1319.5518.

**Allyl 2-O-benzoyl-3-O-benzyl-5-O-(2-O-(2,3-di-O-benzyl-5-O-(2-O-(2-O-benzoyl-3,4,6-tri-O-benzyl- $\alpha$ -D-mannopyranosyl)-3,4,6-tri-O-benzyl- $\alpha$ -D-mannopyranosyl)- $\beta$ -D-arabinofuranosyl)-3-O-benzyl-5-O-<sup>t</sup>butyldiphenylsilyl- $\alpha$ -D-arabinofuranosyl)- $\beta$ -D-arabinofuranoside (37):** Yield: (76%);  $[\alpha]_{\text{D}}^{25} = -37.9$  ( $c = 1.0$ ,  $\text{CHCl}_3$ );  $^1\text{H}$  NMR (399.78MHz,  $\text{CDCl}_3$ ):  $\delta$  1.03 (s, 9H), 3.53 – 3.66 (m, 4H), 3.70 – 3.87 (m, 8H), 3.88 – 4.01 (m, 4H), 4.02 – 4.13 (m, 6H), 4.14 – 4.25 (m, 3H), 4.39 (dd,  $J = 9.8, 3.2$  Hz, 4H), 4.44 – 4.55 (m, 7H), 4.56 – 4.64 (m, 6H), 4.64 – 4.75 (m, 3H), 4.83 (dd,  $J = 10.9, 3.9$  Hz, 2H), 4.96 (dd,  $J = 18.4, 1.6$  Hz, 2H), 5.00 – 5.09 (m, 2H), 5.11 – 5.23 (m, 3H), 5.37 (d,  $J = 4.5$  Hz, 1H), 5.64 – 5.74 (m, 1H), 5.76 (s, 1H), 7.13 – 7.22 (m, 17H), 7.25 (dtd,  $J = 8.6, 5.0, 4.4, 1.9$  Hz, 30H), 7.33 – 7.37 (m, 10H), 7.42 (t,  $J = 7.7$  Hz, 3H), 7.50 – 7.58 (m, 2H), 7.66 (td,  $J = 8.1, 1.5$  Hz, 4H), 7.98 – 8.08

(m, 4H);  $^{13}\text{C}$  NMR (100.53 MHz,  $\text{CDCl}_3$ ):  $\delta$  19.4, 27.0(3C), 64.0, 68.6, 69.1(3C), 71.7, 72.2(3C), 72.2, 72.4, 72.4, 72.7, 73.4(4C), 74.3, 74.4, 75.2, 75.2, 75.3, 78.3, 79.3, 79.7, 79.8, 78.0, 82.2, 82.6, 83.7, 83.9(3C), 85.9, 98.6, 99.6, 99.7, 100.4, 105.8, 117.0, 127.4(3C), 127.4, 127.5(5C), 127.5(3C), 127.6, 127.8(6C), 128.0(3C), 128.1(3C), 128.1(3C), 128.2(3C), 128.3(4C), 128.3(3C), 128.4(4C), 128.4(3C), 128.4, 128.4, 128.5(5C), 128.5, 128.6, 129.6, 129.8(4C), 129.9(3C), 130.1(3C), 130.1, 133.1, 133.3, 133.5, 133.5, 133.9, 135.7, 135.8, 137.7, 138.0, 138.0, 138.0, 138.2, 138.3, 138.6, 138.6, 138.6, 138.6, 165.4, 166.0; IR ( $\text{CHCl}_3$ ): 3045, 2929, 1599, 1433, 1253, 1107, 704  $\text{cm}^{-1}$ ; HRMS (TOF)  $m/z$   $[\text{M} + \text{Na}]^+$  calcd for  $\text{C}_{130}\text{H}_{136}\text{O}_{25}\text{NaSi}$ , 2148.9071, found 2148.9023.

**Allyl 2-O-benzoyl-3,5-di-O-(2-O-(2,3-di-O-benzyl-5-O-(naphthalen-1-yl methyl)- $\beta$ -D-arabinofuranosyl)-3-O-benzyl-5-O<sup>t</sup>butyldiphenylsilyl- $\alpha$ -D-arabinofuranosyl)- $\alpha$ -D-arabinofuranoside (39):** Yield: (77%);  $[\alpha]_{\text{D}}^{25} = -12.5$  ( $c = 1.0$ ,  $\text{CHCl}_3$ );  $^1\text{H}$  NMR (399.78 MHz,  $\text{CDCl}_3$ ):  $\delta$  0.94 (s, 9H), 1.00 (s, 9H), 3.50 – 3.60 (m, 4H), 3.72 (ddd,  $J = 15.6, 8.5, 3.5$  Hz, 4H), 3.78 (d,  $J = 10.9$  Hz, 2H), 3.96 (s, 1H), 3.99 (dd,  $J = 4.5, 1.8$  Hz, 2H), 4.03 – 4.14 (m, 8H), 4.14 – 4.22 (m, 3H), 4.27 (s, 2H), 4.40 (dt,  $J = 9.2, 3.1$  Hz, 4H), 4.44 (s, 1H), 4.45 – 4.50 (m, 3H), 4.52 (s, 1H), 4.54 (d,  $J = 4.1$  Hz, 2H), 4.57 (d,  $J = 3.1$  Hz, 1H), 4.58 – 4.60 (m, 2H), 4.62 (d,  $J = 3.5$  Hz, 1H), 4.64 – 4.70 (m, 2H), 5.06 (d,  $J = 1.2$  Hz, 1H), 5.13 (dd,  $J = 10.5, 1.5$  Hz, 1H), 5.16 (d,  $J = 4.4$  Hz, 1H), 5.19 (s, 1H), 5.26 (dd,  $J = 17.2, 1.6$  Hz, 1H), 5.32 (d,  $J = 5.4$  Hz, 3H), 5.86 (ddt,  $J = 16.7, 10.6, 5.6$  Hz, 1H), 7.14 – 7.17 (m, 5H), 7.19 (dd,  $J = 5.9, 3.5$  Hz, 6H), 7.22 (s, 10H), 7.24 – 7.26 (m, 7H), 7.26 – 7.30 (m, 11H), 7.33 (dd,  $J = 7.5, 1.9$  Hz, 4H), 7.37 – 7.46 (m, 6H), 7.60 (ddd,  $J = 13.8, 7.8, 2.5$  Hz, 11H), 7.65 – 7.73 (m, 4H), 7.74 – 7.79 (m, 2H), 7.92 – 8.01 (m, 2H);  $^{13}\text{C}$  NMR (100.53 MHz,  $\text{CDCl}_3$ ):  $\delta$  19.3, 19.4, 26.9(3C), 27.0(3C), 63.8, 63.9, 66.3, 67.8, 72.2, 72.3, 72.3, 72.4(3C), 72.6, 72.6, 73.2, 73.3, 77.4, 80.1, 80.1, 81.5, 82.1, 82.3, 82.8, 83.1, 83.5, 83.6, 83.7(2C), 83.9, 84.1, 85.1, 85.8, 99.9, 100.2, 105.1, 105.6, 106.9, 117.6, 125.7, 125.7, 125.9, 125.9, 126.1, 126.1, 126.3, 126.4, 127.5, 127.5(2C), 127.6, 127.7(3C), 127.8(17C), 127.9, 128.0(2C), 128.0(2C), 128.2(3C), 128.2(2C), 128.3(2C), 128.4(3C), 128.4(6C), 128.5(3C), 128.5(2C), 129.5, 129.7(2C), 129.9, 133.0, 133.3, 133.4, 133.5, 133.7, 134.0, 135.7(3C), 135.7(6C), 135.8(3C), 137.8, 138.0,

138.2, 138.3, 138.3, 138.4, 165.8; IR (CHCl<sub>3</sub>): 3032, 2929, 1601, 1452, 1228, 1107, 695 cm<sup>-1</sup>; HRMS (TOF) m/z [M + Na]<sup>+</sup> calcd for C<sub>131</sub>H<sub>138</sub>O<sub>22</sub>NaSi<sub>2</sub>, 2141.9115, found 2141.8357.

**Allyl 2-O-benzoyl-3,5-di-O-(2-O-(2,3-di-O-benzyl-β-D-arabinofuranosyl)-3-O-benzyl-5-O-<sup>t</sup>butyldiphenylsilyl-α-D-arabinofuranosyl)-α-D-arabinofuranoside (40):** Yield: (75%); [α]<sub>D</sub><sup>25</sup> = -7.8 (*c* = 1.0, CHCl<sub>3</sub>); <sup>1</sup>H NMR (399.78 MHz, CDCl<sub>3</sub>): δ 0.97 (s, 9H), 1.02 (s, 9H), 2.33 (d, *J* = 23.3 Hz, 2H), 3.47 – 3.61 (m, 3H), 3.67 (d, *J* = 11.4 Hz, 3H), 3.76 (d, *J* = 11.1 Hz, 3H), 3.90 (s, 1H), 3.96 – 4.03 (m, 4H), 4.06 – 4.14 (m, 3H), 4.15 – 4.21 (m, 3H), 4.22 – 4.31 (m, 4H), 4.36 – 4.43 (m, 2H), 4.44 – 4.50 (m, 3H), 4.51 – 4.65 (m, 6H), 4.67 – 4.77 (m, 3H), 5.07 (s, 1H), 5.12 – 5.19 (m, 2H), 5.20 – 5.22 (m, 1H), 5.23 – 5.36 (m, 4H), 5.88 (ddt, *J* = 15.4, 10.4, 4.9 Hz, 1H), 7.18 – 7.37 (m, 44H), 7.45 – 7.51 (m, 1H), 7.56 – 7.67 (m, 8H), 7.96 (d, *J* = 8.3 Hz, 2H); <sup>13</sup>C NMR (100.53 MHz, CDCl<sub>3</sub>): δ 19.3, 19.4, 26.9(3C), 27.0(3C), 63.5, 63.6, 63.7, 63.8, 66.6, 67.9, 72.2, 72.4, 72.4, 72.4, 72.7, 72.7, 80.8(3C), 81.5, 81.8, 82.0, 82.1, 82.2, 82.2, 82.8, 82.8, 83.5, 84.0, 84.1, 84.9, 85.5, 99.4, 99.7, 105.1, 105.2, 106.5, 117.7, 127.6, 127.7(2C), 127.8(11C), 127.8(11C), 128.0(3C), 128.2(2C), 128.4(2C), 128.4(2C), 128.5(3C), 128.5(4C), 128.6(4C), 129.4, 129.8(3C), 129.9(2C), 133.2, 133.4, 133.4, 133.5(2C), 133.9, 135.7, 135.7, 135.8, 137.7, 137.8, 137.9, 138.0, 138.2, 138.2, 165.7; IR (CHCl<sub>3</sub>): 3461, 3031, 2926, 1597, 1454, 1267, 1106, 701 cm<sup>-1</sup>; HRMS (ESI) m/z [M + Na]<sup>+</sup> calcd for C<sub>109</sub>H<sub>122</sub>O<sub>22</sub>NaSi<sub>2</sub>, 1861.7864, found 1861.7887.

**Allyl 2-O-benzoyl-3,5-di-O-(2-O-(2,3-di-O-benzyl-5-O-(2-O-(2-O-benzoyl-3,4,6-tri-O-benzyl-α-D-mannopyranosyl)-3,4,6-tri-O-benzyl-α-D-mannopyranosyl)-β-D-arabinofuranosyl)-3-O-benzyl-5-O-<sup>t</sup>butyldiphenylsilyl-α-D-arabinofuranosyl)-α-D-arabinofuranoside (41):** Yield: (60%); [α]<sub>D</sub><sup>25</sup> = -14.9 (*c* = 1.0, CHCl<sub>3</sub>); <sup>1</sup>H NMR (399.78 MHz, CDCl<sub>3</sub>): δ 0.93 (s, 9H), 0.98 (s, 9H), 3.49 – 3.65 (m, 7H), 3.75 (dd, *J* = 20.5, 10.0 Hz, 14H), 3.87 (d, *J* = 9.0 Hz, 2H), 3.97 (d, *J* = 26.5 Hz, 13H), 4.08 (s, 6H), 4.16 (s, 2H), 4.22 – 4.31 (m, 3H), 4.39 (d, *J* = 12.2 Hz, 9H), 4.48 (d, *J* = 11.0 Hz, 9H), 4.59 (dd, *J* = 25.9, 12.1 Hz, 15H), 4.72 (d, *J* = 11.1 Hz, 2H), 4.80 – 4.93 (m, 6H), 5.04 – 5.12 (m, 2H), 5.13 – 5.25 (m, 4H), 5.30 (d, *J* = 15.0 Hz, 3H), 5.76 (s, 1H), 5.85 (s, 1H), 7.08 – 7.33 (m, 100H), 7.35 (d, *J* = 6.9 Hz, 6H), 7.43 (s, 2H), 7.50 – 7.67 (m, 10H), 7.92 – 8.14 (m, 7H); <sup>13</sup>C NMR (100.53 MHz, CDCl<sub>3</sub>): δ

19.3, 19.4, 26.9(3C), 27.0(3C), 63.7, 63.8, 65.3, 67.8, 69.0, 69.1(3C), 69.6, 69.7, 70.3, 71.5, 71.7(2C), 72.1, 72.3(2C), 72.3(3C), 72.4, 72.5, 73.4(5C), 73.8, 74.3, 74.3, 74.5, 74.5, 74.7, 75.1, 75.2, 75.2, 75.3(2C), 75.3, 76.9, 77.4, 78.3, 78.3, 79.2, 79.4, 80.0(2C), 81.7, 82.2, 82.4, 82.8, 83.4, 83.5, 83.8(2C), 83.8, 83.9, 84.3, 85.1, 86.1, 98.6, 98.8, 99.7, 99.8, 100.0, 100.5, 105.1, 105.5, 106.8, 117.6, 127.4(2C), 127.4(2C), 127.5(10C), 127.6(6C), 127.6, 127.7(16C), 128.0, 128.0(6C), 128.1(3C), 128.1(4C), 128.2(2C), 128.2(4C), 128.3(10C), 128.4(17C), 128.5(10C), 128.5(5C), 128.7, 129.4, 129.7(4C), 129.9(2C), 130.1(5C), 133.1, 133.1, 133.3, 133.4, 133.5(2C), 133.6, 134.0, 135.7(3C), 135.7(6C), 135.8(3C), 137.6, 137.7, 137.9, 138.0, 138.1(2C), 138.2(2C), 138.2, 138.3, 138.3, 138.6, 138.6(2C), 138.6, 138.7, 138.7(2C), 165.4, 165.7, 166.0; IR (CHCl<sub>3</sub>): 3035, 2925, 1599, 1454, 1268, 1106, 699 cm<sup>-1</sup>; MALDI (TOF) m/z [M + K]<sup>+</sup> calcd for C<sub>231</sub>H<sub>242</sub>O<sub>44</sub>KSi<sub>2</sub>, 3816.59, found 3816.96.

**Allyl 2-O-benzoyl-3-O-(2,3-di-O-benzoyl-5-O-(2,3-di-O-benzoyl-5-O-(2,3-di-O-benzoyl-5-O-(4-oxopentanoyl)- $\alpha$ -D-arabinofuranosyl)- $\alpha$ -D-arabinofuranosyl)- $\alpha$ -D-arabinofuranosyl)-5-O-(2,3-di-O-benzoyl-5-O-(2,3-di-O-benzoyl-5-O-(2,3-di-O-benzoyl- $\alpha$ -D-arabinofuranosyl)- $\alpha$ -D-arabinofuranosyl)- $\alpha$ -D-arabinofuranosyl)- $\alpha$ -D-arabinofuranoside (43):** Yield: (80%);  $[\alpha]_D^{25} = 12.2$  ( $c = 1.0$ , CHCl<sub>3</sub>); <sup>1</sup>H NMR (399.78 MHz, CDCl<sub>3</sub>):  $\delta$  2.10 (s, 3H), 2.53 – 2.60 (m, 2H), 2.68 (t,  $J = 6.4$  Hz, 2H), 3.78 – 3.94 (m, 6H), 4.03 (dq,  $J = 15.5, 5.3, 4.6$  Hz, 3H), 4.13 – 4.19 (m, 4H), 4.23 (dd,  $J = 13.3, 4.8$  Hz, 1H), 4.38 (dd,  $J = 9.0, 5.0$  Hz, 3H), 4.43 – 4.49 (m, 3H), 4.51 – 4.60 (m, 4H), 5.11 – 5.17 (m, 1H), 5.22 (s, 1H), 5.30 (d,  $J = 6.0$  Hz, 2H), 5.35 – 5.41 (m, 6H), 5.43 (s, 1H), 5.50 (s, 1H), 5.58 (d,  $J = 6.5$  Hz, 3H), 5.61 (s, 6H), 5.68 (d,  $J = 4.5$  Hz, 1H), 5.89 (ddt,  $J = 16.6, 10.6, 5.4$  Hz, 1H), 7.18 – 7.29 (m, 8H), 7.32 – 7.50 (m, 28H), 7.53 – 7.59 (m, 2H), 7.81 – 7.93 (m, 10H), 7.95 – 8.06 (m, 17H); <sup>13</sup>C NMR (100.53 MHz, CDCl<sub>3</sub>):  $\delta$  27.9, 29.9, 38.0, 62.4, 63.7, 65.6, 65.7, 66.0, 66.0, 66.1, 67.8(2C), 77.0, 77.2, 77.3, 77.4, 77.7, 77.8(2C), 80.7, 81.2, 81.5(3C), 81.6(2C), 81.8, 82.1, 82.1, 82.6, 82.8, 82.9, 83.7, 105.1, 105.4, 105.8(2C), 105.9, 105.9, 106.0, 117.4, 128.3(2C), 128.3(2C), 128.4(3C), 128.5(2C), 128.5(2C), 128.6(4C), 128.6(7C), 128.6(4C), 129.0, 129.0, 129.1, 129.1(2C), 129.1, 129.1, 129.2, 129.2, 129.2, 129.3, 129.3, 129.3, 129.8, 129.8, 129.8, 129.9(10C), 129.9(9C), 133.2(2C), 133.3, 133.3, 133.4, 133.4(2C), 133.5(2C), 133.5(2C), 133.5(2C), 133.6, 133.7, 133.9(2C), 165.1(2C), 165.2(3C), 165.2,

165.6, 165.7(2C), 165.7, 165.7(2C), 166.1, 172.5, 206.4; IR (CHCl<sub>3</sub>): 3039, 2925, 1752, 1599, 1448, 1231, 1106, 705 cm<sup>-1</sup>; HRMS (TOF) m/z [M + Na]<sup>+</sup> calcd for C<sub>134</sub>H<sub>120</sub>O<sub>44</sub>Na, 2455.7049, found 2455.5154.

**Allyl 2-O-benzoyl-3-O-(2,3-di-O-benzoyl-5-O-(2,3-di-O-benzoyl-5-O-(2,3-di-O-benzoyl-5-O-(4-oxopentanoyl)- $\alpha$ -D-arabinofuranosyl)- $\alpha$ -D-arabinofuranosyl)- $\alpha$ -D-arabinofuranosyl)-5-O-(2,3-di-O-benzoyl-5-O-(2,3-di-O-benzoyl-5-O-(2,3-di-O-benzoyl-5-O-(2-O-benzoyl-3-O-benzyl-5-O-(2-O-(2,3-di-O-benzyl-5-O-(2-O-(2-O-benzoyl-3,4,6-tri-O-benzyl- $\alpha$ -D-mannopyranosyl)-3,4,6-tri-O-benzyl- $\alpha$ -D-mannopyranosyl)- $\beta$ -D-arabinofuranosyl)-3-O-benzyl-5-O<sup>t</sup>butyldiphenylsilyl- $\alpha$ -D-arabinofuranosyl)- $\alpha$ -D-arabinofuranosyl)- $\alpha$ -D-arabinofuranosyl)- $\alpha$ -D-arabinofuranosyl)- $\alpha$ -D-arabinofuranoside (44):** Yield: (85%); [ $\alpha$ ]<sub>D</sub><sup>25</sup> = 15.2 (c = 1.0, CHCl<sub>3</sub>); <sup>1</sup>H NMR (399.78 MHz, CDCl<sub>3</sub>):  $\delta$  0.99 (s, 9H), 2.10 (s, 3H), 2.56 (dd, J = 10.3, 4.4 Hz, 2H), 2.68 (t, J = 6.6 Hz, 2H), 3.44 – 3.57 (m, 2H), 3.62 (dd, J = 18.6, 8.4 Hz, 3H), 3.68 – 3.78 (m, 6H), 3.80 (s, 1H), 3.82 – 3.88 (m, 7H), 3.94 (dd, J = 14.2, 6.6 Hz, 4H), 4.01 (dt, J = 14.4, 5.0 Hz, 6H), 4.09 (s, 4H), 4.17 (d, J = 11.3 Hz, 4H), 4.23 (dd, J = 13.1, 5.0 Hz, 1H), 4.28 (s, 1H), 4.32 (s, 1H), 4.35 (s, 1H), 4.40 (d, J = 11.4 Hz, 7H), 4.44 (d, J = 4.0 Hz, 2H), 4.47 (d, J = 5.3 Hz, 2H), 4.48 – 4.53 (m, 3H), 4.56 (d, J = 10.5 Hz, 8H), 4.62 (d, J = 11.5 Hz, 2H), 4.72 (d, J = 11.0 Hz, 1H), 4.83 (d, J = 10.9 Hz, 2H), 4.90 (s, 1H), 4.99 (s, 1H), 5.07 (d, J = 3.4 Hz, 1H), 5.11 – 5.18 (m, 2H), 5.22 (s, 1H), 5.26 – 5.31 (m, 3H), 5.32 – 5.41 (m, 5H), 5.43 (s, 2H), 5.51 (s, 1H), 5.57 (s, 3H), 5.59 – 5.64 (m, 8H), 5.68 (d, J = 4.5 Hz, 1H), 5.76 (s, 1H), 5.89 (ddt, J = 15.5, 10.4, 5.4 Hz, 1H), 7.08 (d, J = 7.3 Hz, 3H), 7.11 (s, 2H), 7.14 (d, J = 4.3 Hz, 7H), 7.17 – 7.20 (m, 13H), 7.21 – 7.27 (m, 29H), 7.28 – 7.30 (m, 7H), 7.32 (d, J = 4.0 Hz, 5H), 7.36 (dd, J = 11.6, 5.2 Hz, 21H), 7.40 (s, 2H), 7.43 – 7.50 (m, 10H), 7.55 (d, J = 8.4 Hz, 2H), 7.62 (t, J = 8.1 Hz, 4H), 7.85 (t, J = 9.5 Hz, 8H), 7.92 (d, J = 8.1 Hz, 2H), 7.94 – 8.00 (m, 13H), 8.02 (s, 1H), 8.03 – 8.08 (m, 6H); <sup>13</sup>C NMR (100.53 MHz, CDCl<sub>3</sub>):  $\delta$  19.4, 27.0(3C), 27.9, 29.8, 38.0, 63.7, 63.9, 65.7, 65.7, 65.8, 65.8, 66.1, 67.8, 69.0, 69.1, 69.1, 69.6, 71.7, 72.1, 72.2(2C), 72.2(2C), 72.3, 72.3, 72.4, 72.4, 73.4(3C), 74.3, 74.5, 75.1, 75.2, 75.3, 76.9, 77.0, 77.3, 77.4, 77.7, 78.3, 79.4, 80.0, 80.8, 81.2, 81.5(3C), 81.7, 81.8, 82.0, 82.1, 82.2, 82.3(2C), 82.6, 82.8, 82.9(2C), 83.1, 83.2, 83.5, 83.8, 84.1, 86.0, 98.7, 99.7, 100.7, 105.1, 105.4, 105.9(2C), 106.0, 106.0,

106.0, 106.2(2C), 117.4, 127.3(3C), 127.5(8C), 127.6(4C), 127.7(2C), 127.7(5C), 127.8(7C), 127.9, 128.0(3C), 128.0(3C), 128.1(3C), 128.2(3C), 128.2(3C), 128.3(8C), 128.4(14C), 128.4(3C), 128.5(3C), 128.5(5C), 128.5(12C), 128.6(3C), 129.0, 129.1, 129.1, 129.1, 129.2, 129.2(2C), 129.2(2C), 129.3(3C), 129.4, 129.6, 129.7(2C), 129.9(16C), 129.9(7C), 130.0(4C), 130.1, 133.1(2C), 133.1, 133.2, 133.3, 133.4(3C), 133.4(3C), 133.5(2C), 133.5, 133.6, 134.0(2C), 135.7, 135.7(3C), 137.7(3C), 137.8, 138.0, 138.1, 138.2, 138.2, 138.5, 138.6, 138.6, 138.6, 165.1(2C), 165.2, 165.2(2C), 165.3, 165.3, 165.4, 165.6(3C), 165.7(3C), 165.7, 172.5, 206.3; IR (CHCl<sub>3</sub>): 3033, 2928, 1730, 1620, 1453, 1263, 1105, 703 cm<sup>-1</sup>; MALDI (TOF) m/z [M + Na]<sup>+</sup> calcd for C<sub>261</sub>H<sub>250</sub>O<sub>68</sub>NaSi, 4524.5839, found 4524.9119.

**Allyl 2-O-benzoyl-3-O-(2,3-di-O-benzoyl-5-O-(2,3-di-O-benzoyl-5-O-(2,3-di-O-benzoyl- $\alpha$ -D-arabinofuranosyl)- $\alpha$ -D-arabinofuranosyl)- $\alpha$ -D-arabinofuranosyl)-5-O-(2,3-di-O-benzoyl-5-O-(2,3-di-O-benzoyl-5-O-(2,3-di-O-benzoyl-5-O-(2-O-benzoyl-3-O-benzyl-5-O-(2-O-(2,3-di-O-benzyl-5-O-(2-O-(2-O-benzoyl-3,4,6-tri-O-benzyl- $\alpha$ -D-mannopyranosyl)-3,4,6-tri-O-benzyl- $\alpha$ -D-mannopyranosyl)- $\beta$ -D-arabinofuranosyl)-3-O-benzyl-5-O-<sup>t</sup>butyldiphenylsilyl- $\alpha$ -D-arabinofuranosyl)- $\alpha$ -D-arabinofuranosyl)- $\alpha$ -D-arabinofuranosyl)- $\alpha$ -D-arabinofuranosyl)- $\alpha$ -D-arabinofuranoside (45):** Yield: (80%);  $[\alpha]_D^{25} = 16.3$  ( $c = 1.0$ , CHCl<sub>3</sub>); <sup>1</sup>H NMR (399.78 MHz, CDCl<sub>3</sub>):  $\delta$  0.99 (s, 9H), 3.52 (dd,  $J = 17.8, 8.7$  Hz, 2H), 3.62 (dd,  $J = 18.7, 8.6$  Hz, 3H), 3.67 – 3.80 (m, 7H), 3.84 (d,  $J = 7.4$  Hz, 8H), 3.91 – 4.04 (m, 12H), 4.06 – 4.11 (m, 4H), 4.12 – 4.17 (m, 3H), 4.18 – 4.26 (m, 2H), 4.27 (s, 1H), 4.39 (d,  $J = 11.4$  Hz, 8H), 4.45 (dd,  $J = 17.1, 5.1$  Hz, 6H), 4.51 (d,  $J = 6.2$  Hz, 2H), 4.54 – 4.64 (m, 8H), 4.72 (d,  $J = 11.0$  Hz, 1H), 4.83 (dd,  $J = 10.9, 2.2$  Hz, 2H), 4.90 (s, 1H), 4.98 (s, 1H), 5.07 (d,  $J = 3.9$  Hz, 1H), 5.11 – 5.17 (m, 2H), 5.21 (s, 1H), 5.26 (s, 1H), 5.30 (s, 2H), 5.32 – 5.40 (m, 5H), 5.43 (s, 2H), 5.48 (s, 1H), 5.58 (dd,  $J = 15.0, 5.7$  Hz, 9H), 5.63 (d,  $J = 4.5$  Hz, 1H), 5.67 (d,  $J = 4.2$  Hz, 1H), 5.76 (s, 1H), 5.88 (dq,  $J = 15.6, 4.9$  Hz, 1H), 7.06 – 7.15 (m, 14H), 7.17 – 7.25 (m, 38H), 7.28 (d,  $J = 3.1$  Hz, 10H), 7.31 (s, 3H), 7.36 (dt,  $J = 15.4, 7.9$  Hz, 24H), 7.43 – 7.50 (m, 9H), 7.54 (t,  $J = 7.5$  Hz, 2H), 7.61 (t,  $J = 8.1$  Hz, 4H), 7.81 – 7.88 (m, 8H), 7.91 (d,  $J = 7.4$  Hz, 2H), 7.95 – 8.02 (m, 16H), 8.04 – 8.08 (m, 5H); <sup>13</sup>C NMR (100.53 MHz, CDCl<sub>3</sub>):  $\delta$  19.4, 27.0, 62.4, 64.0, 65.7(2C), 65.8, 66.0, 66.1, 67.8, 69.0, 69.1, 69.1, 69.6, 71.7(2C), 72.1, 72.2(2C), 72.3(2C), 72.3(2C), 72.3, 72.4, 72.5, 73.4,

73.4, 74.3, 74.5, 75.1, 75.2, 75.3, 77.0, 77.2, 77.2, 77.3, 77.4, 77.8, 78.3, 79.4, 80.0, 80.8, 81.6(3C), 81.7, 81.7, 81.8(2C), 82.0, 82.1, 82.3(2C), 82.6, 82.8(3C), 82.9, 83.2, 83.5, 83.8(2C), 83.8, 84.1, 86.0, 98.7, 99.7, 100.7, 105.1, 105.4, 105.9(4C), 106.0, 106.2(2C), 117.4, 127.4(3C), 127.5(8C), 127.6(5C), 127.7(3C), 127.7(3C), 127.8(2C), 127.8(3C), 127.9, 128.0 (3C), 128.0(3C), 128.1(3C), 128.2(3C), 128.3(2C), 128.3(5C), 128.3(3C), 128.4(8C), 128.4(10C), 128.4(2C), 128.5(4C), 128.5(6C), 128.6(10C), 129.1(2C), 129.1, 129.2, 129.2(2C), 129.3, 129.3(3C), 129.4, 129.6, 129.8(2C), 129.9(20C), 130.0(5C), 130.1(3C), 130.1, 133.1(2C), 133.2, 133.3, 133.3(2C), 133.4(3C), 133.5(4C), 133.6, 133.6, 134.0(2C), 135.7, 135.8, 137.7, 137.9, 138.0, 138.1, 138.2, 138.3, 138.6, 138.6, 138.6, 138.7, 165.2(2C), 165.2(3C), 165.3, 165.4, 165.5, 165.6(3C), 165.7, 165.7(2C), 166.1; IR (CHCl<sub>3</sub>): 3430, 3030, 2934, 1590, 1447, 1229, 1105, 694 cm<sup>-1</sup>; MALDI (TOF) m/z [M + Na]<sup>+</sup> calcd for C<sub>256</sub>H<sub>244</sub>O<sub>66</sub>Na<sub>2</sub>Si, 4426.5471, found 4426.8154.

**Allyl 2-O-benzoyl-3-O-(2,3-di-O-benzoyl-5-O-(2,3-di-O-benzoyl-5-O-(2,3-di-O-benzoyl-5-O-(2-O-benzoyl-3,5-di-O-(2-O-(2,3-di-O-benzoyl-5-O-(2-O-(2-O-benzoyl-3,4,6-tri-O-benzyl- $\alpha$ -D-mannopyranosyl)-3,4,6-tri-O-benzyl- $\alpha$ -D-mannopyranosyl)- $\beta$ -D-arabinofuranosyl)-3-O-benzyl-5-O-<sup>t</sup>butyldiphenylsilyl- $\alpha$ -D-arabinofuranosyl)- $\alpha$ -D-arabinofuranosyl)- $\alpha$ -D-arabinofuranosyl)- $\alpha$ -D-arabinofuranosyl)-5-O-(2,3-di-O-benzoyl-5-O-(2,3-di-O-benzoyl-5-O-(2-O-benzoyl-3-O-benzyl-5-O-(2-O-(2,3-di-O-benzyl-5-O-(2-O-(2-O-benzoyl-3,4,6-tri-O-benzyl- $\alpha$ -D-mannopyranosyl)-3,4,6-tri-O-benzyl- $\alpha$ -D-mannopyranosyl)- $\beta$ -D-arabinofuranosyl)-3-O-benzyl-5-O-<sup>t</sup>butyldiphenylsilyl- $\alpha$ -D-arabinofuranosyl)- $\alpha$ -D-arabinofuranosyl)- $\alpha$ -D-arabinofuranosyl)- $\alpha$ -D-arabinofuranosyl)- $\alpha$ -D-arabinofuranoside (46):** Yield: (80%); [ $\alpha$ ]<sub>D</sub><sup>25</sup> = 5.4 (*c* = 1.0, CHCl<sub>3</sub>); <sup>1</sup>H NMR (399.78 MHz, CDCl<sub>3</sub>):  $\delta$  0.88 (s, 9H), 0.95 (s, 9H), 0.98 (s, 9H), 3.44 – 3.54 (m, 5H), 3.56 (dd, *J* = 15.0, 6.6 Hz, 4H), 3.60 – 3.65 (m, 4H), 3.68 (dd, *J* = 21.6, 9.0 Hz, 9H), 3.72 – 3.80 (m, 11H), 3.84 (t, *J* = 12.2 Hz, 9H), 3.88 – 3.95 (m, 9H), 3.95 – 4.04 (m, 19H), 4.09 (d, *J* = 16.0 Hz, 12H), 4.13 – 4.24 (m, 5H), 4.27 (d, *J* = 6.7 Hz, 2H), 4.31 (dd, *J* = 10.8, 3.7 Hz, 5H), 4.33 – 4.36 (m, 4H), 4.36 – 4.40 (m, 11H), 4.43 (d, *J* = 8.5 Hz, 5H), 4.44 – 4.47 (m, 4H), 4.48 – 4.51 (m, 7H), 4.52 – 4.57 (m, 16H), 4.60 (dd, *J* = 13.6, 8.2 Hz, 5H), 4.71 (dd, *J* = 10.9, 5.7 Hz, 3H), 4.82 (dd, *J* = 10.4, 6.8 Hz, 6H), 4.85 – 4.89 (m, 3H), 4.98

(s, 1H), 5.06 (s, 2H), 5.09 – 5.18 (m, 6H), 5.20 (s, 2H), 5.26 (d,  $J = 3.6$  Hz, 2H), 5.32 (dd,  $J = 21.2, 5.0$  Hz, 4H), 5.37 (d,  $J = 11.7$  Hz, 2H), 5.42 (s, 2H), 5.53 (d,  $J = 21.6$  Hz, 4H), 5.57 – 5.63 (m, 6H), 5.67 (d,  $J = 3.9$  Hz, 1H), 5.75 (s, 3H), 5.85 (ddq,  $J = 23.3, 12.6, 6.7, 5.9$  Hz, 1H), 7.01 (dt,  $J = 12.1, 6.5$  Hz, 2H), 7.06 (dd,  $J = 14.6, 7.1$  Hz, 12H), 7.09 – 7.15 (m, 30H), 7.18 (dq,  $J = 14.1, 7.5, 6.8$  Hz, 48H), 7.21 – 7.31 (m, 86H), 7.31 – 7.36 (m, 22H), 7.36 – 7.40 (m, 5H), 7.41 – 7.49 (m, 7H), 7.50 – 7.56 (m, 6H), 7.56 – 7.63 (m, 9H), 7.75 – 7.81 (m, 3H), 7.84 (dd,  $J = 13.0, 7.7$  Hz, 4H), 7.88 – 7.93 (m, 4H), 7.97 (dd,  $J = 18.9, 7.6$  Hz, 12H), 8.01 – 8.07 (m, 10H);  $^{13}\text{C}$  NMR (100.53 MHz,  $\text{CDCl}_3$ ):  $\delta$  19.4(3C), 26.9(9C), 63.6, 63.7(2C), 64.0(2C), 65.4, 65.6(2C), 65.6(2C), 65.7(2C), 65.7, 65.8(2C), 65.8(2C), 66.3, 67.8(3C), 69.0(2C), 69.0, 69.1(5C), 69.1, 69.6(2C), 69.7, 71.7(3C), 71.9, 72.0, 72.1, 72.3(7C), 72.3(2C), 72.4, 72.5, 73.4(3C), 73.4(3C), 73.4(4C), 74.3(2C), 74.3, 74.5(2C), 75.0(2C), 75.1, 75.2(2C), 75.3(2C), 75.3, 75.3(2C), 75.3(3C), 78.3, 78.3, 79.2, 79.4, 79.4, 80.0(3C), 81.0, 81.5, 81.6(3C), 81.7, 81.7, 81.8, 81.9, 82.0(2C), 82.3(2C), 82.3, 82.3(2C), 82.5, 82.5, 82.8(2C), 83.0, 83.0, 83.1, 83.4, 83.4, 83.5, 83.8(2C), 83.9, 84.2, 84.2, 84.4(2C), 85.6, 86.0, 86.3, 98.8(2C), 98.8, 99.7, 99.7(2C), 100.5, 100.7(2C), 105.1, 105.4, 105.9(4C), 106.0(2C), 106.2(2C), 106.4, 107.3, 117.4, 127.4(6C), 127.4, 127.5(2C), 127.5(6C), 127.5(12C), 127.5(12C), 127.6(10C), 127.7(3C), 127.7(10C), 127.8(7C), 127.8(7C), 127.8(6C), 127.9, 127.9(2C), 128.0(2C), 128.0(6C), 128.1(5C), 128.1(6C), 128.2(2C), 128.2(6C), 128.3(4C), 128.3(18C), 128.4(14C), 128.4(18C), 128.5(6C), 128.5(5C), 128.5(8C), 128.5(5C), 128.6(4C), 128.6(4C), 128.7, 129.1, 129.1, 129.2, 129.2, 129.2, 129.2(2C), 129.3(2C), 129.3, 129.4, 129.4, 129.5, 129.6(2C), 129.7(3C), 129.8(3C), 129.8(2C), 129.9(3C), 129.9(6C), 129.9(6C), 130.0(2C), 130.0(3C), 130.1(6C), 130.1(2C), 130.2, 133.0, 133.1, 133.1(2C), 133.2(2C), 133.3, 133.4(2C), 133.4(2C), 133.4(2C), 133.5(2C), 133.5, 133.5, 133.6, 134.0(2C), 135.6(2C), 135.7(3C), 135.7(3C), 135.8(3C), 137.7, 137.7, 137.9, 137.9, 138.0, 138.0, 138.1, 138.1, 138.1, 138.2, 138.2, 138.2, 138.2, 138.3(2C), 138.3, 138.6(2C), 138.6(3C), 138.6(2C), 138.6, 138.7(2C), 138.7, 138.7, 139.4, 165.2, 165.2, 165.2(3C), 165.3, 165.3, 165.4, 165.4, 165.5(2C), 165.6(2C), 165.7(4C), 165.7; IR ( $\text{CHCl}_3$ ): 3035, 2926, 1600, 1444, 1266, 1106, 699  $\text{cm}^{-1}$ ; MALDI (TOF)  $m/z$   $[\text{M} + \text{Na}]^+$  calcd for  $\text{C}_{484}\text{H}_{480}\text{O}_{109}\text{NaSi}_2$ , 8147.1390, found 8144.5210.



**Propyl 3-O-(5-O-(5-O-(5-O-(3,5-di-O-(2-O-(5-O-(2-O-( $\alpha$ -D-mannopyranosyl)- $\alpha$ -D-mannopyranosyl)- $\beta$ -D-arabinofuranosyl)- $\alpha$ -D-arabinofuranosyl)- $\alpha$ -D-arabinofuranosyl)- $\alpha$ -D-arabinofuranosyl)- $\alpha$ -D-arabinofuranosyl)-5-O-(5-O-(5-O-(5-O-(5-O-(2-O-(5-O-(2-O-( $\alpha$ -D-mannopyranosyl)- $\alpha$ -D-mannopyranosyl)- $\beta$ -D-arabinofuranosyl)- $\alpha$ -D-arabinofuranosyl)- $\alpha$ -D-arabinofuranosyl)- $\alpha$ -D-arabinofuranosyl)- $\alpha$ -D-arabinofuranosyl)- $\alpha$ -D-arabinofuranoside (47):** Yield: (54% over three steps);  $[\alpha]_D^{25} = 32.5$  (5mg/ml, H<sub>2</sub>O:MeOH=4:1); <sup>1</sup>H NMR (600.40 MHz, D<sub>2</sub>O): 0.81 (t, *J* = 7.4 Hz, 3H), 1.51 (dd, *J* = 14.1, 7.1 Hz, 2H), 3.45 (dd, *J* = 16.3, 6.5 Hz, 1H), 3.52 (dd, *J* = 19.3, 9.6 Hz, 6H), 3.65 – 3.58 (m, 14H), 3.68 (dd, *J* = 15.7, 8.4 Hz, 12H), 3.74 (dd, *J* = 11.1, 7.3 Hz, 10H), 3.79 (t, *J* = 9.7 Hz, 15H), 3.85 (dd, *J* = 9.9, 6.9 Hz, 4H), 3.92 (s, 15H), 4.06 – 3.97 (m, 23H), 4.08 (s, 3H), 4.12 (d, *J* = 3.9 Hz, 7H), 4.19 (d, *J* = 13.9 Hz, 3H), 4.93 (s, 3H), 4.96 (s, 1H), 4.99 (s, 6H), 5.02 (s, 1H), 5.06 (d, *J* = 6.5 Hz, 7H), 5.09 (s, 2H), 5.16 (s, 1H); <sup>13</sup>C NMR (150.99 MHz, D<sub>2</sub>O):  $\delta$  9.8, 22.0, 58.9, 60.6, 60.6, 60.7(2C), 61.1(2C), 61.7, 66.1(2C), 66.2, 66.6, 66.6(2C), 66.6, 66.8, 66.8, 66.9(6C), 67.8, 68.2(3C), 69.9(3C), 70.0, 70.1(2C), 70.2(2C), 72.8(2C), 73.2(3C), 74.0(2C), 75.0(3C), 75.0, 75.1, 76.0(3C), 76.5, 76.6, 76.6, 76.7, 76.7, 76.7, 76.7, 78.7(2C), 79.1, 79.1(2C), 79.7(2C), 79.7(2C), 80.8, 80.8(4C), 80.8, 80.8, 81.0, 81.3, 81.6, 81.7, 82.1, 82.2, 82.3, 82.3(2C), 82.4, 83.1, 83.1(2C), 83.1, 86.9, 86.9, 87.0, 87.4, 98.2(3C), 100.4, 100.5, 100.7, 102.3(3C), 105.4, 105.5, 105.6, 107.2, 107.3, 107.4, 107.5(2C), 107.5(4C); HRMS (MALDI-TOF) *m/z* [M + Na]<sup>+</sup> calcd for C<sub>114</sub>H<sub>188</sub>O<sub>91</sub>Na<sup>+</sup>, 3037.00, found 3036.55.

# <sup>1</sup>H-, <sup>13</sup>C, DEPT- NMR Spectral Charts

## <sup>1</sup>H NMR Spectrum (399.78 MHz, CDCl<sub>3</sub>) of Compound **8**

20160510-GPS-173-P

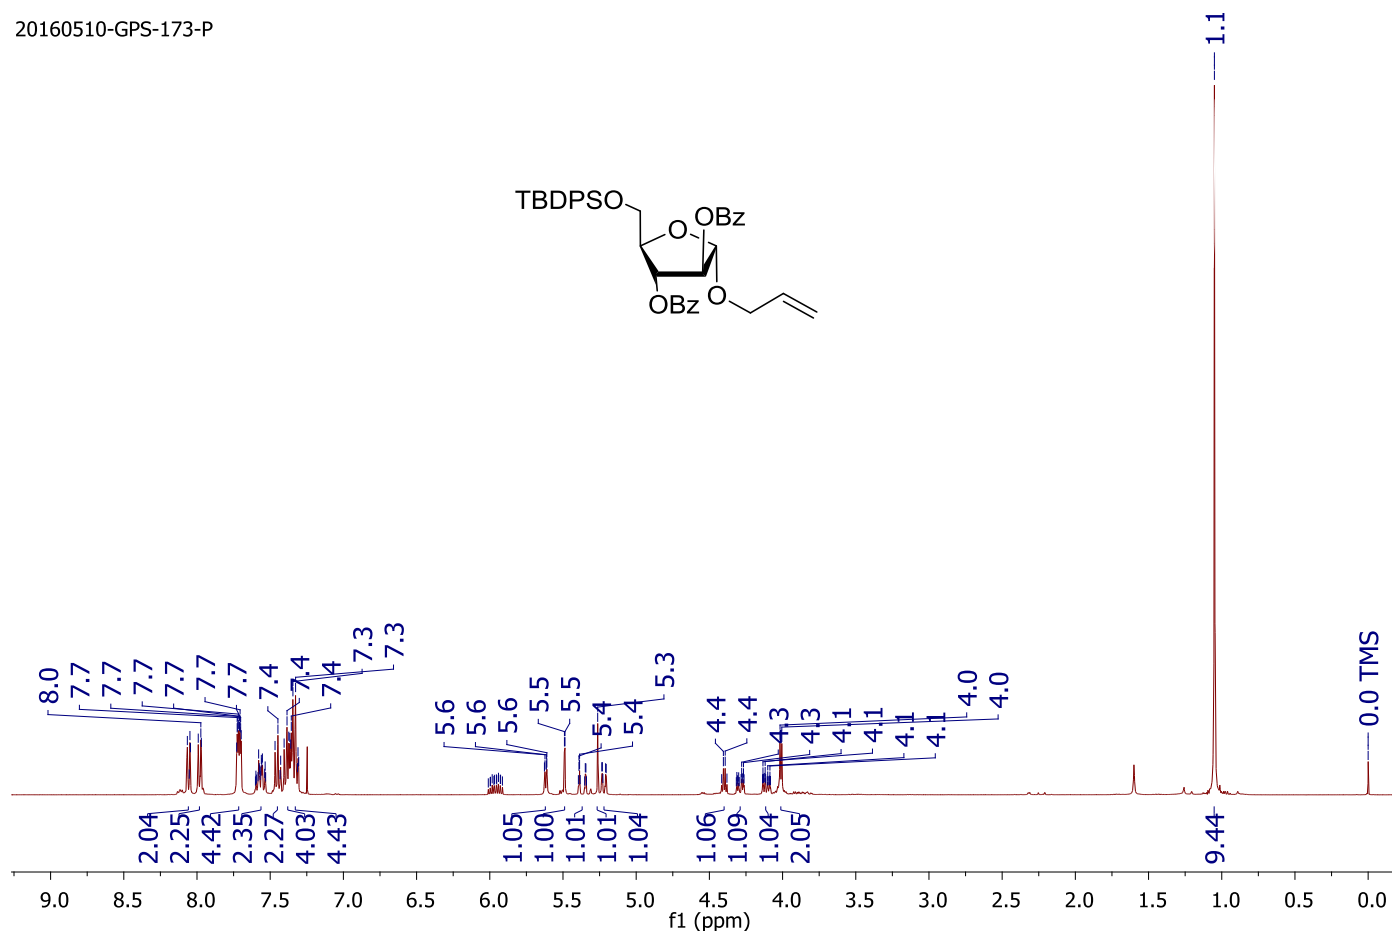

$^{13}\text{C}$  NMR Spectrum (100.53 MHz,  $\text{CDCl}_3$ ) of Compound **8**

20160510-GPS-173-P

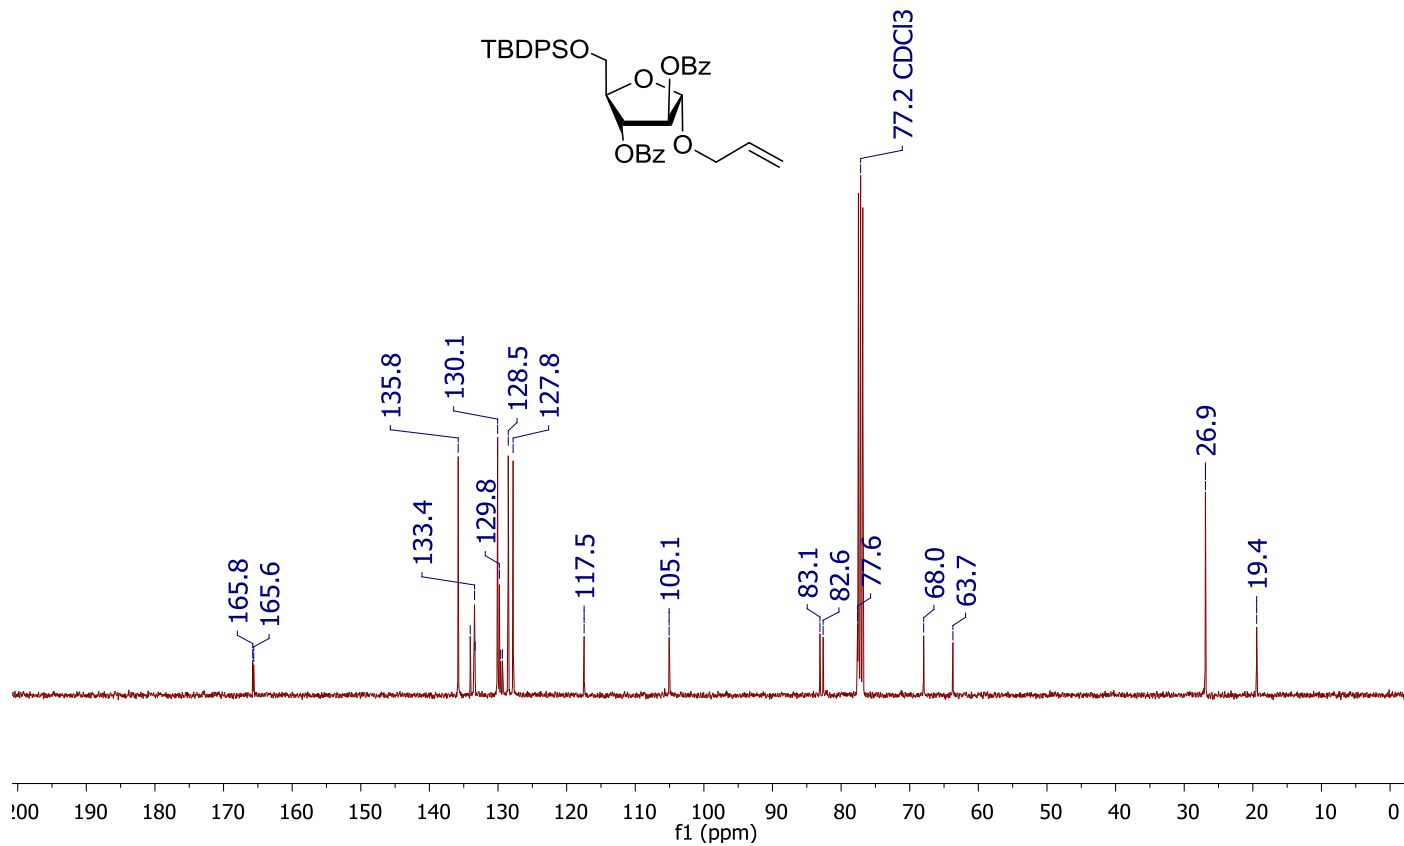

DEPT Spectrum (100.53 MHz, CDCl<sub>3</sub>) of Compound **8**

20160510-GPS-173-P

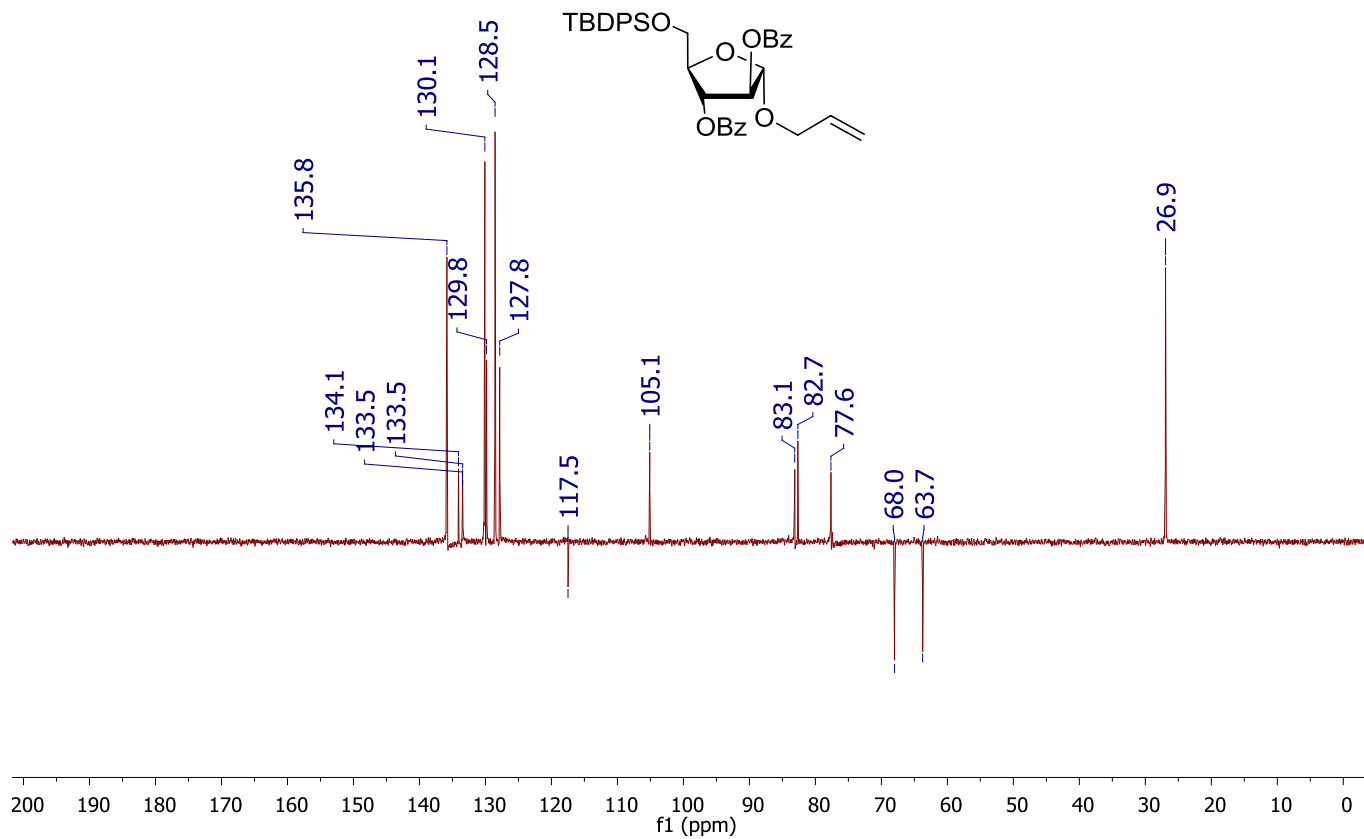

# <sup>1</sup>H NMR Spectrum (399.78 MHz, CDCl<sub>3</sub>) of Compound **9**

20160416-MI-5-76A.12.fid  
MI-5-76A

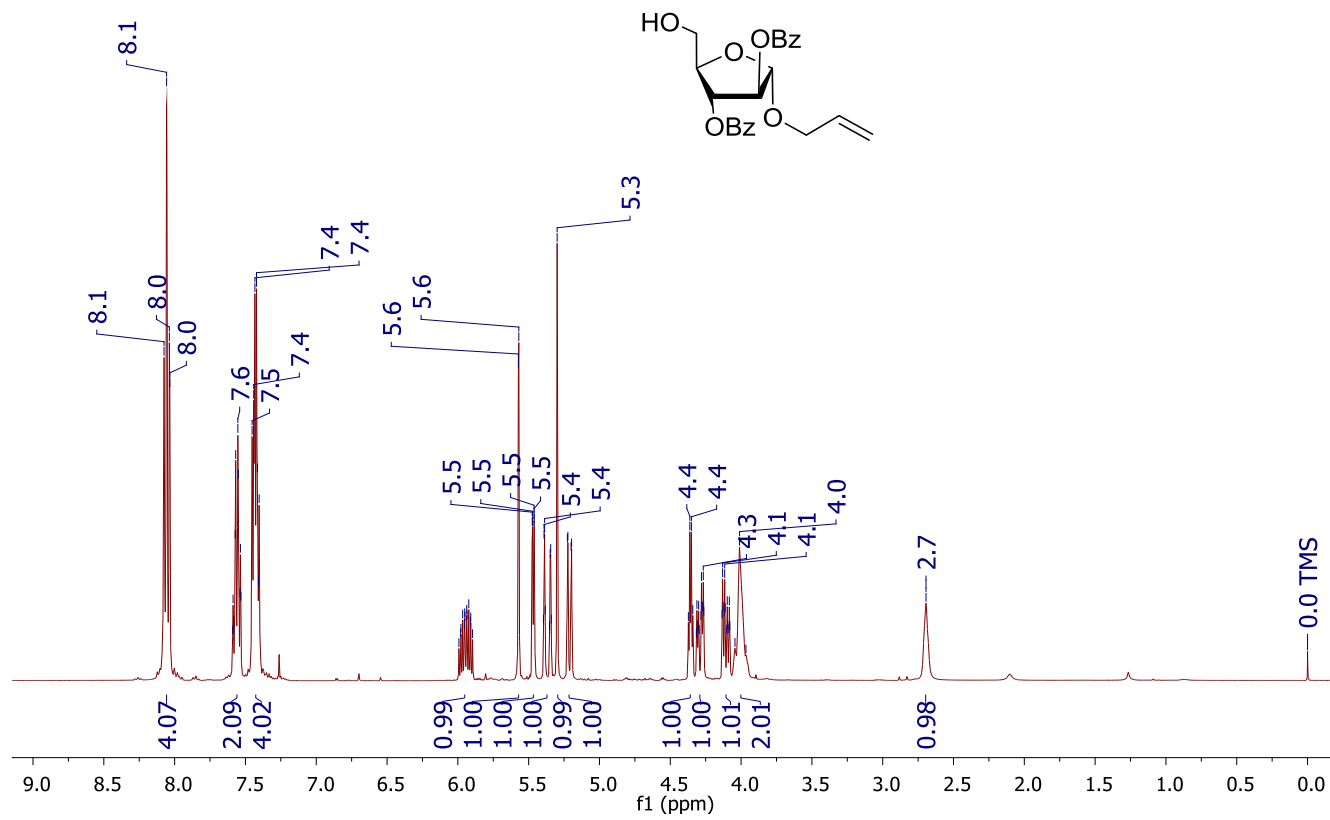

<sup>13</sup>C NMR Spectrum (100.53 MHz, CDCl<sub>3</sub>) of Compound **9**

20160416-MI-5-76A.9.fid  
MI-5-76A

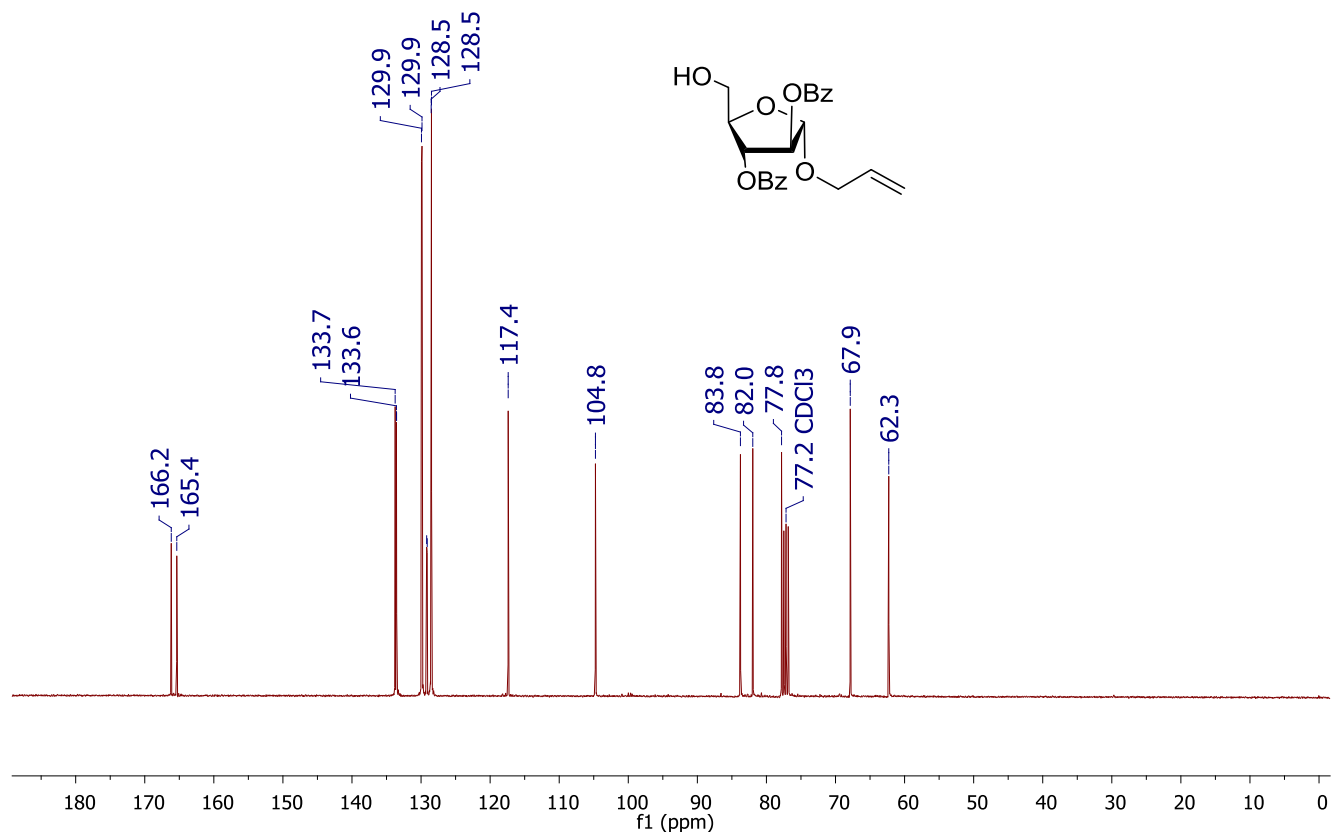

# DEPT Spectrum (100.53 MHz, CDCl<sub>3</sub>) of Compound **9**

20160416-MI-5-76A.11.fid  
MI-5-76A

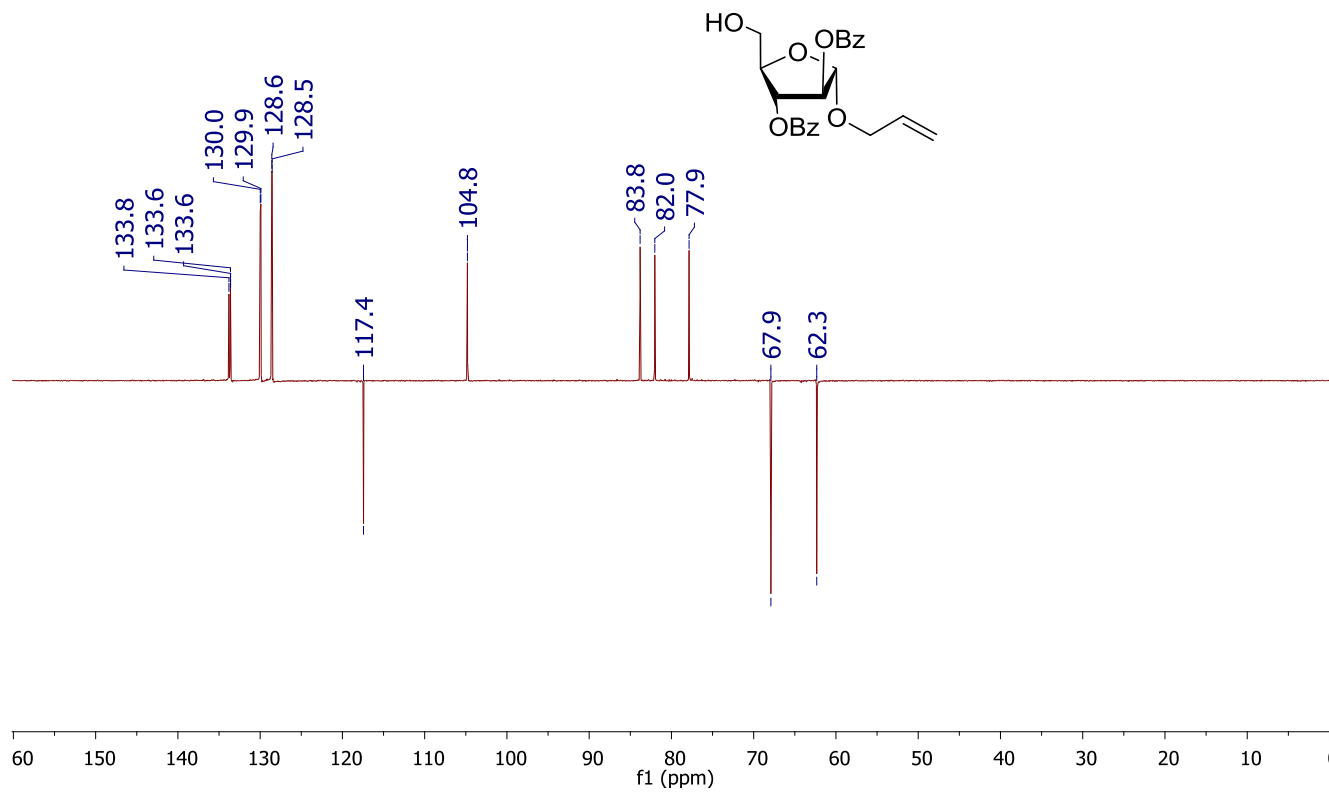

<sup>1</sup>H NMR Spectrum (399.78 MHz, CDCl<sub>3</sub>) of Compound **12**

20160328-MI-5-77.48.fid  
MI-5-77

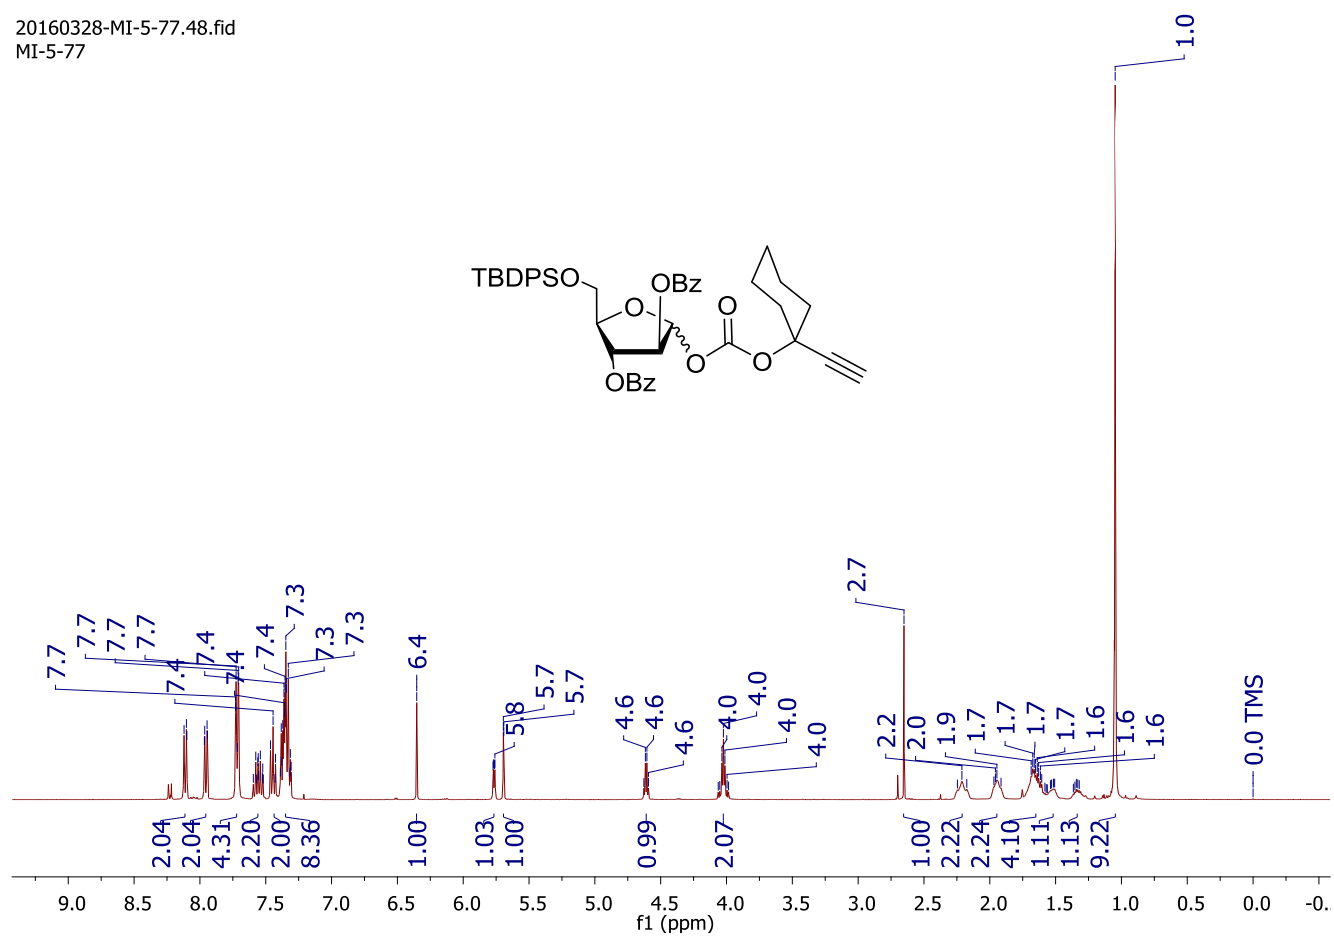



<sup>13</sup>C NMR Spectrum (100.53 MHz, CDCl<sub>3</sub>) of Compound **12**

20160328-MI-5-77.50.fid  
MI-5-77

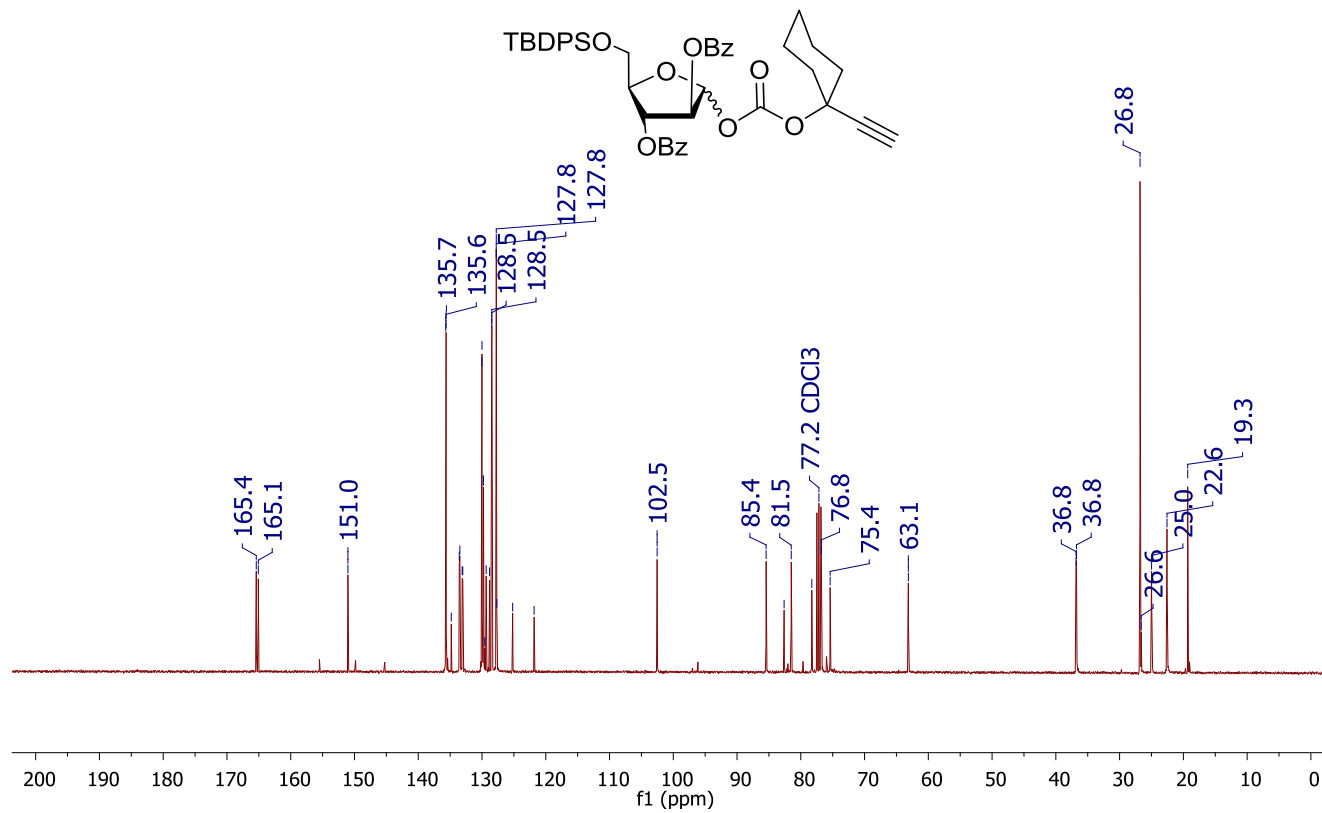

# DEPT Spectrum (100.53 MHz, CDCl<sub>3</sub>) of Compound 12

20160328-MI-5-77.51.fid  
MI-5-77

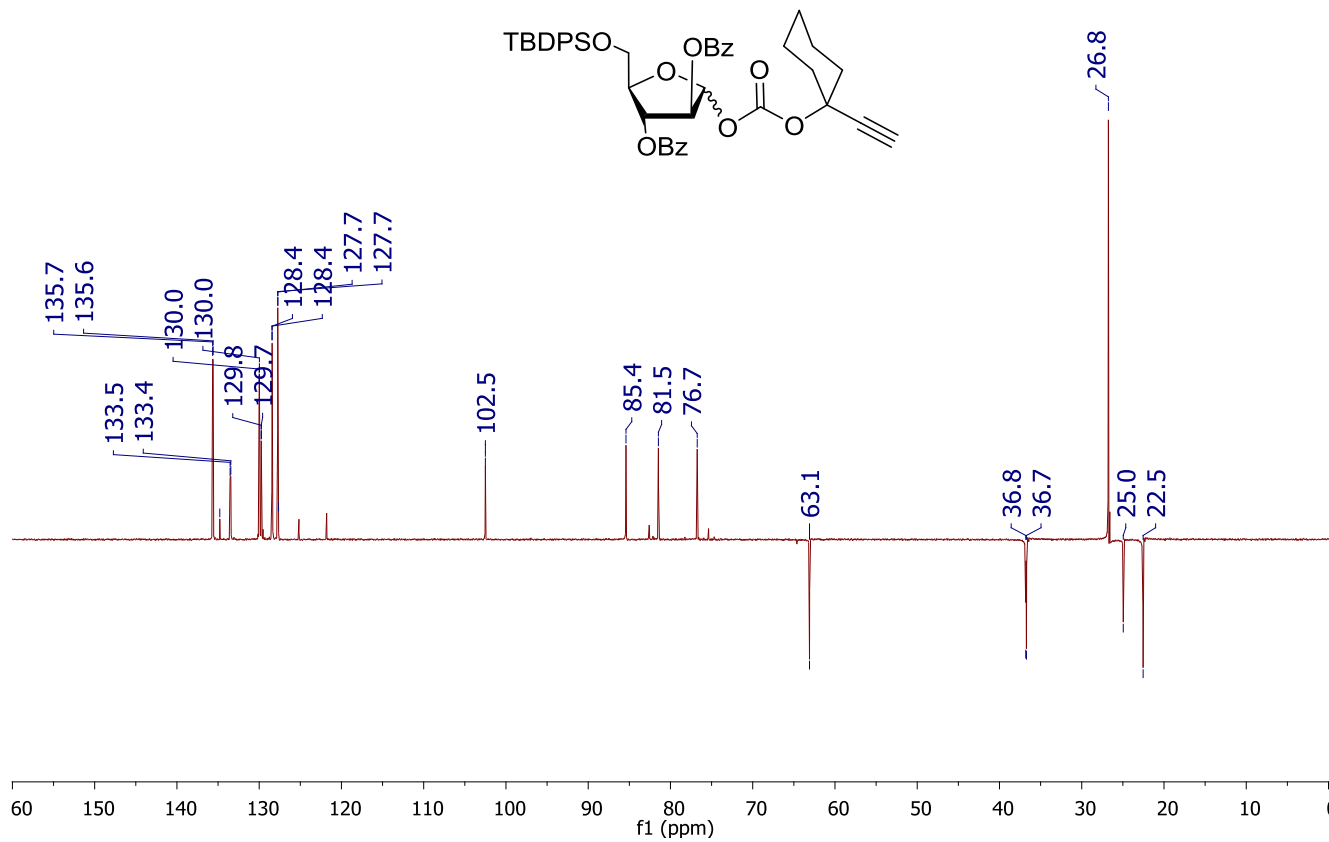

<sup>1</sup>H NMR Spectrum (399.78 MHz, CDCl<sub>3</sub>) of Compound **13**

20160328-MI-5-63/42  
MI-5-63

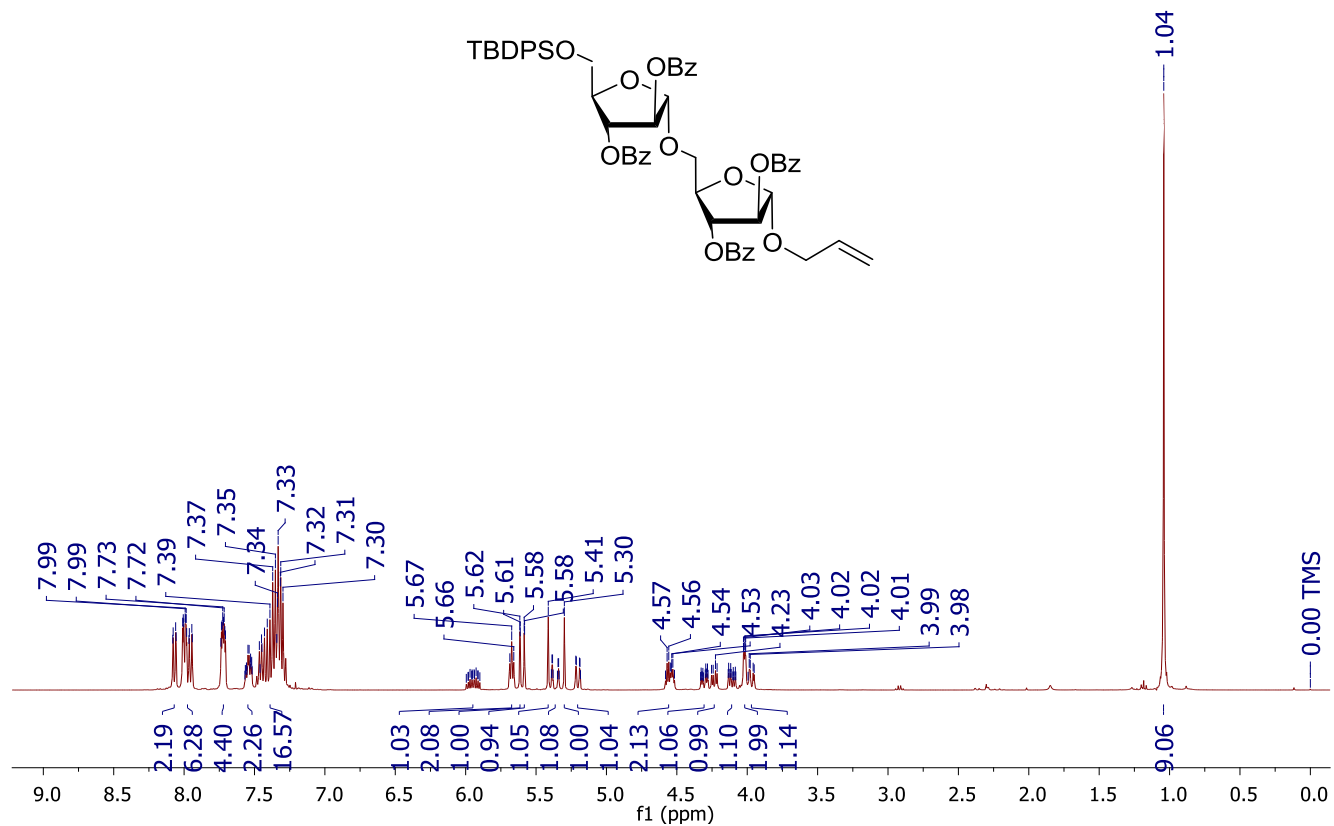

<sup>13</sup>C NMR Spectrum (100.53 MHz, CDCl<sub>3</sub>) of Compound **13**

20160328-MI-5-63/44  
MI-5-63

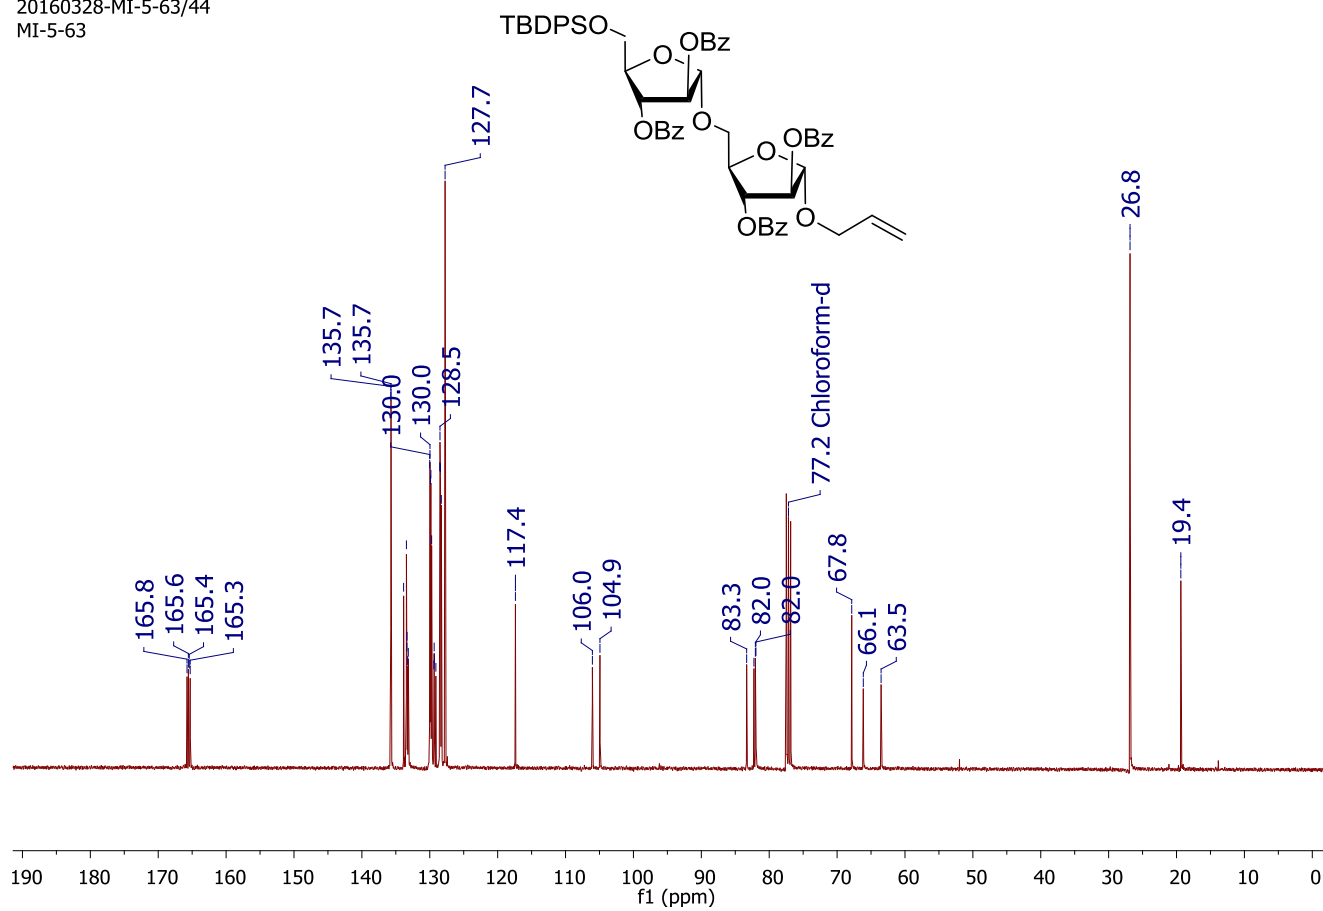

# DEPT Spectrum (100.53 MHz, CDCl<sub>3</sub>) of Compound 13

20160328-MI-5-63/45  
MI-5-63

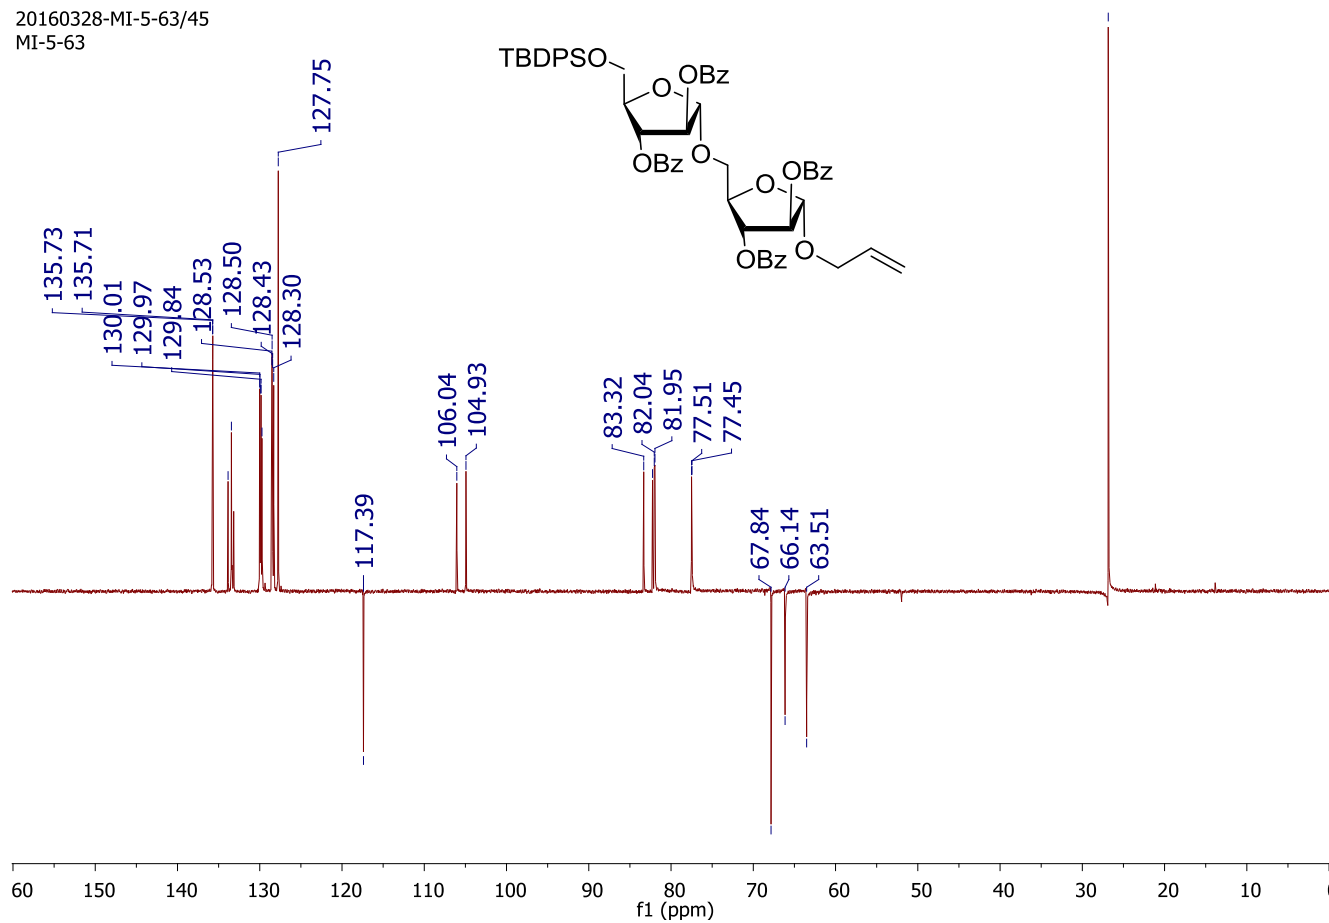

<sup>1</sup>H NMR Spectrum (399.78 MHz, CDCl<sub>3</sub>) of Compound 14

20160425-MI-5-63A.41.fid  
MI-5-63A

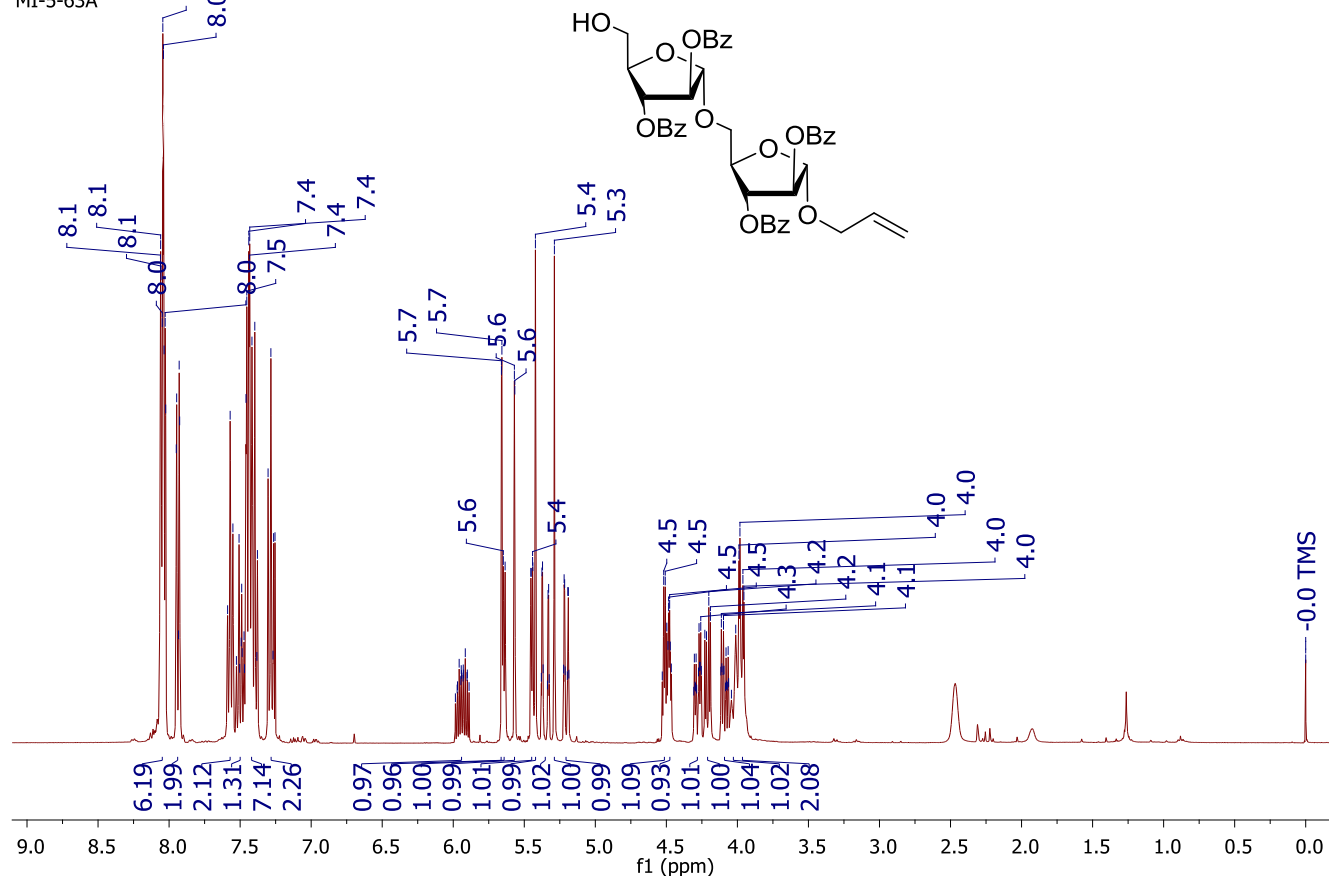

<sup>13</sup>C NMR Spectrum (100.53 MHz, CDCl<sub>3</sub>) of Compound **14**

20160425-MI-5-63A.43.fid  
MI-5-63A

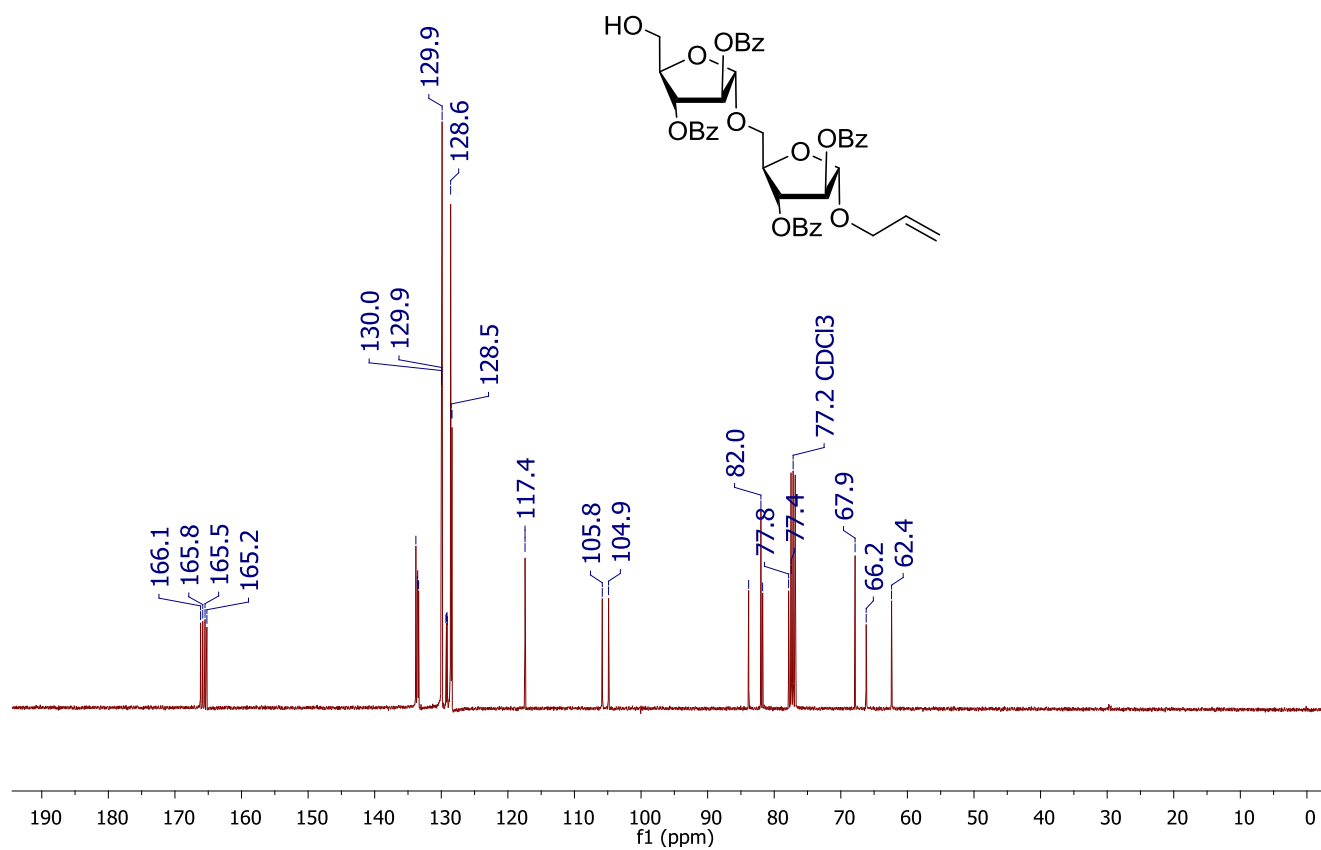

# DEPT Spectrum (100.53 MHz, CDCl<sub>3</sub>) of Compound 14

20160425-MI-5-63A.44.fid  
MI-5-63A

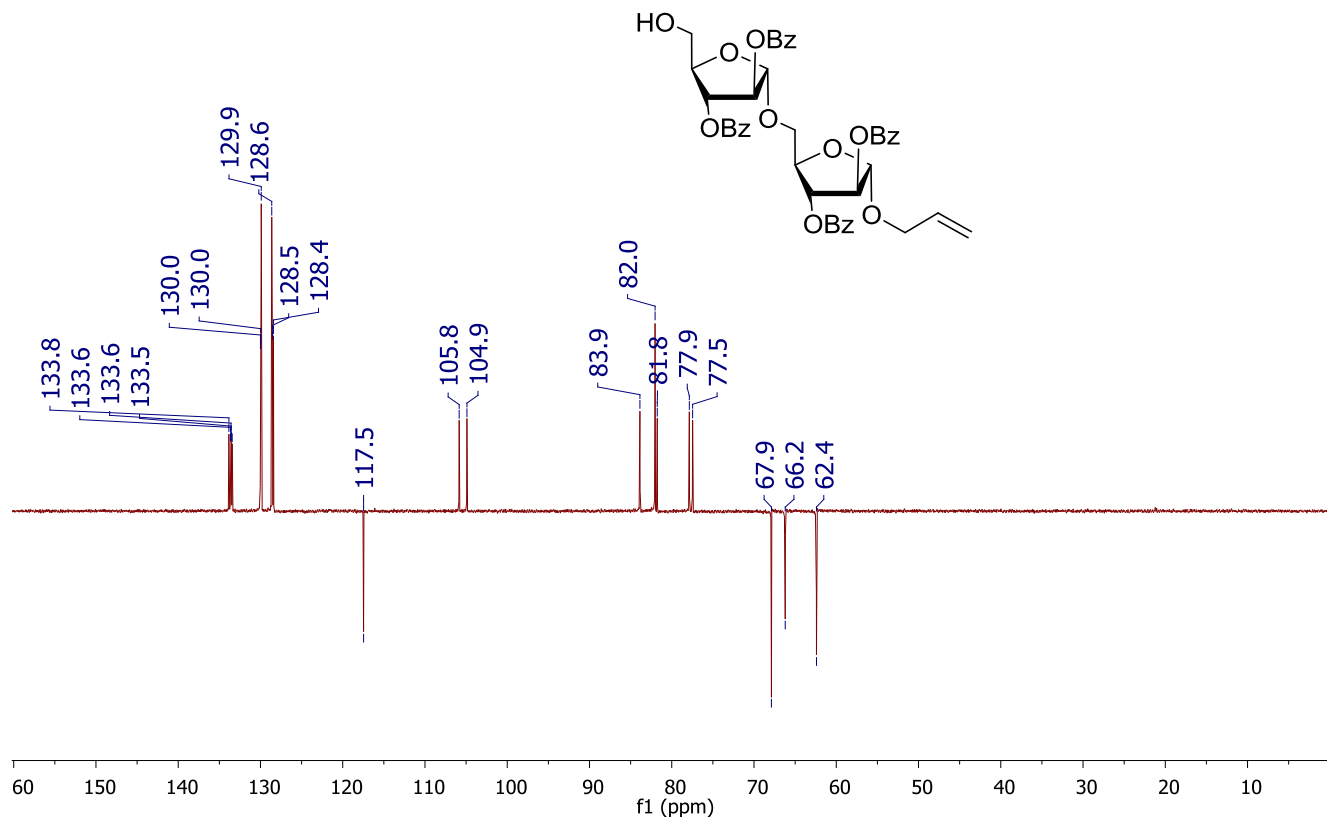



<sup>1</sup>H NMR Spectrum (399.78 MHz, CDCl<sub>3</sub>) of Compound **15a**

20160328-MI-5-78/45  
MI-5-78

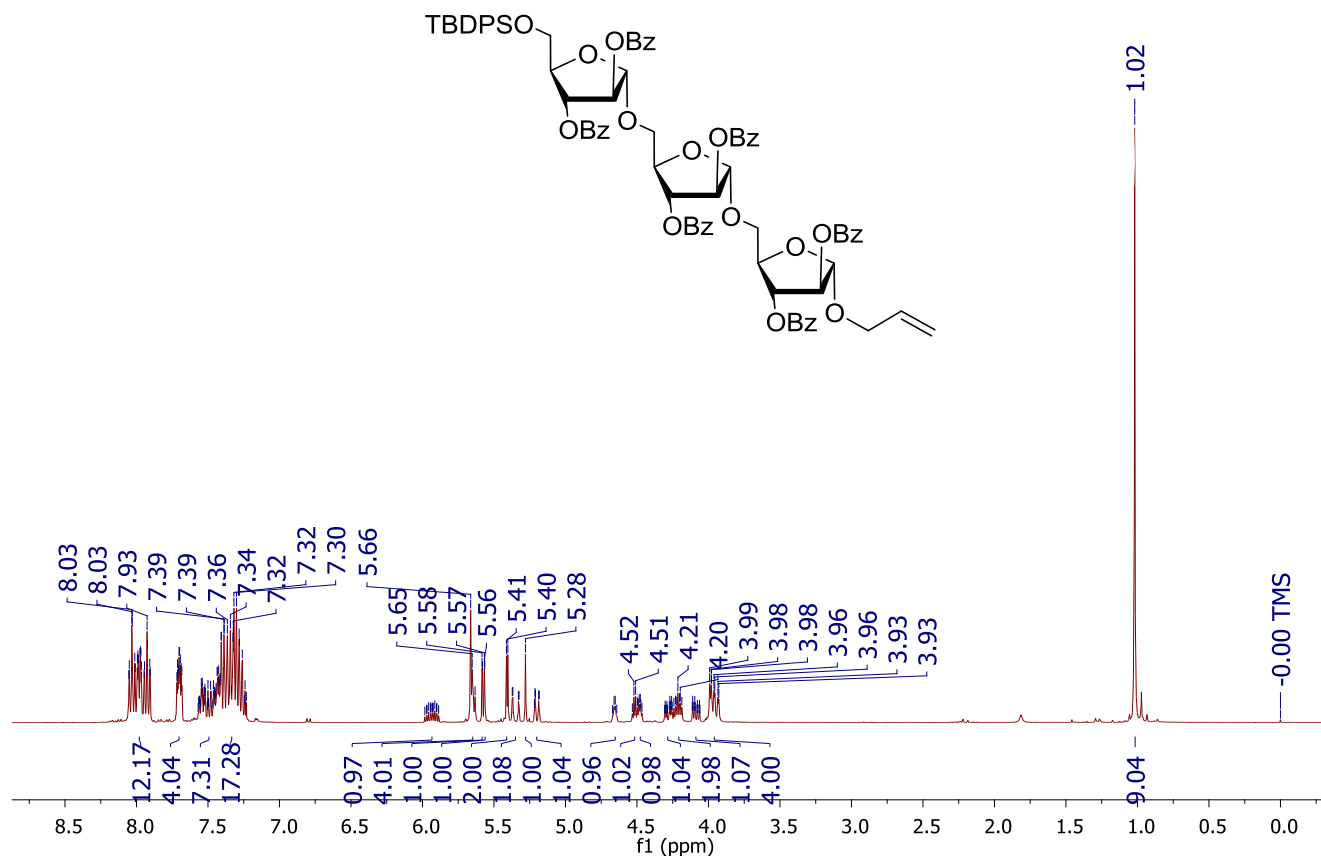

<sup>13</sup>C NMR Spectrum (100.53 MHz, CDCl<sub>3</sub>) of Compound **15a**

20160328-MI-5-78/47  
MI-5-78

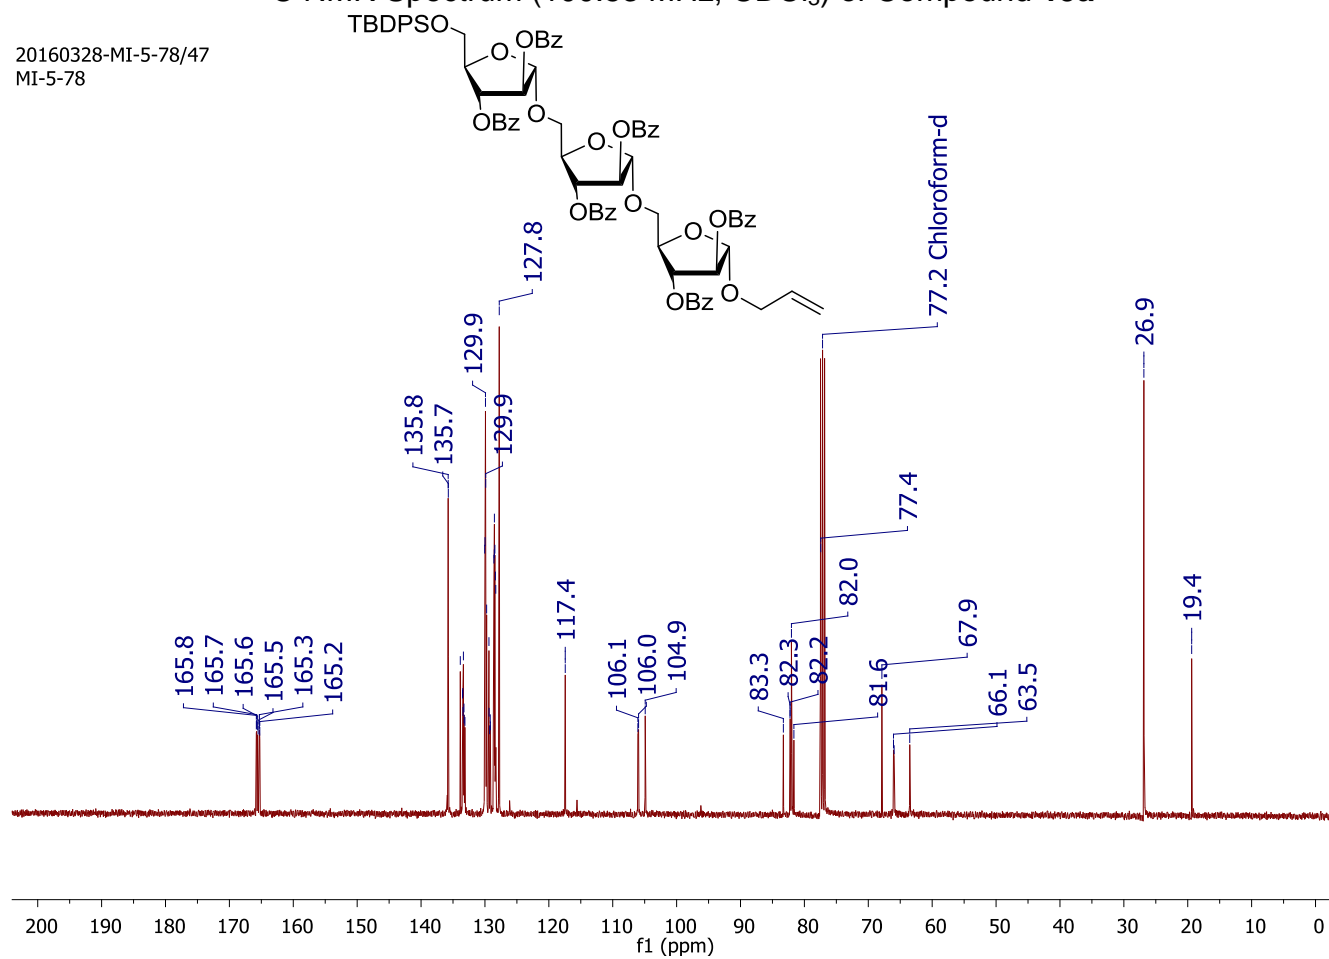

DEPT Spectrum (100.53 MHz, CDCl<sub>3</sub>) of Compound **15a**

20160328-MI-5-78/48  
MI-5-78

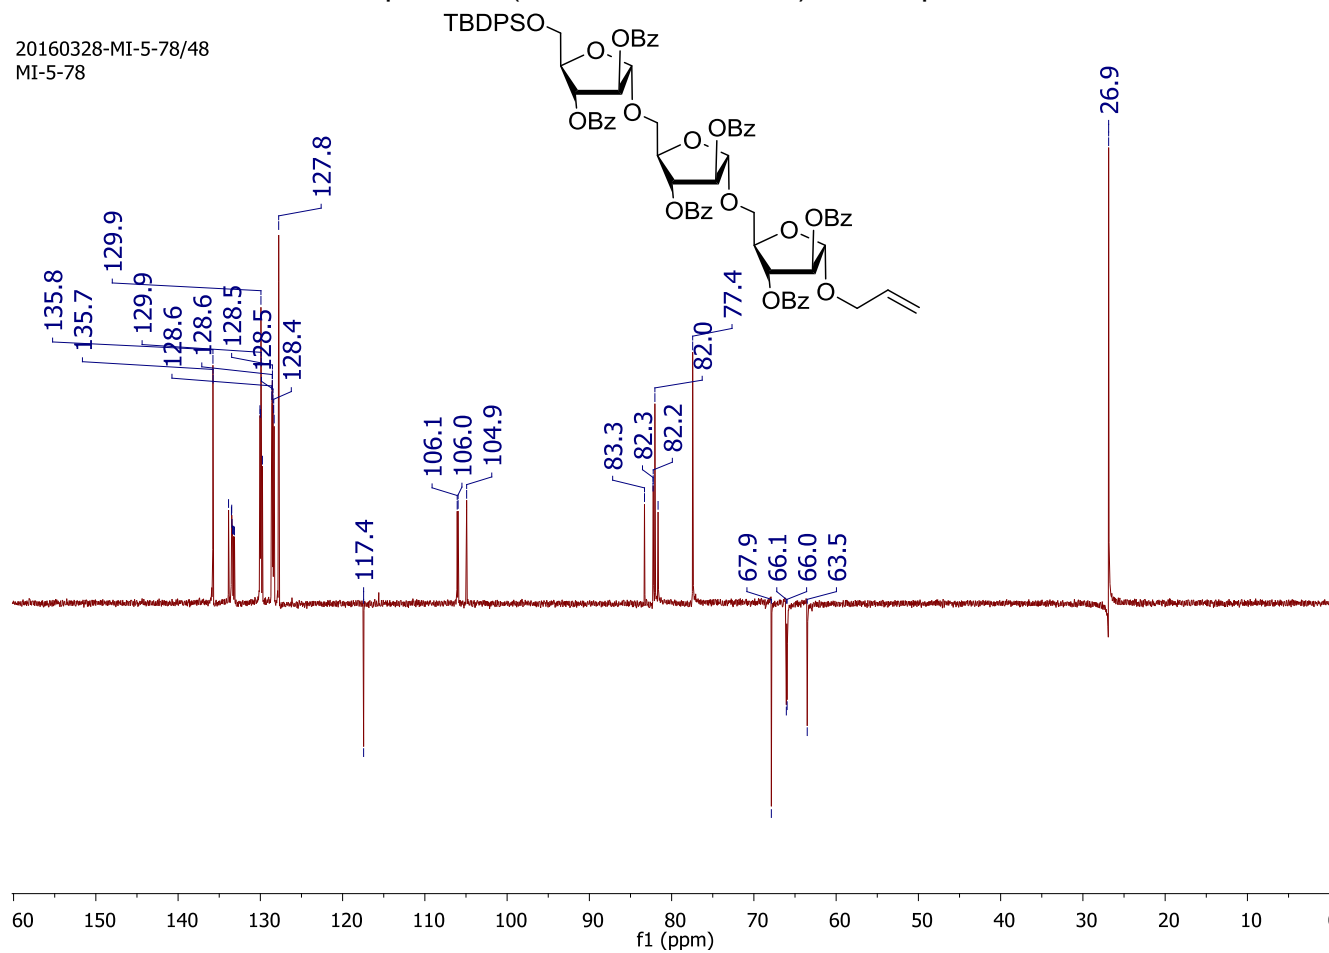

<sup>1</sup>H NMR Spectrum (399.78 MHz, CDCl<sub>3</sub>) of Compound **15b**

20160328-MI-5-79/38  
MI-5-79

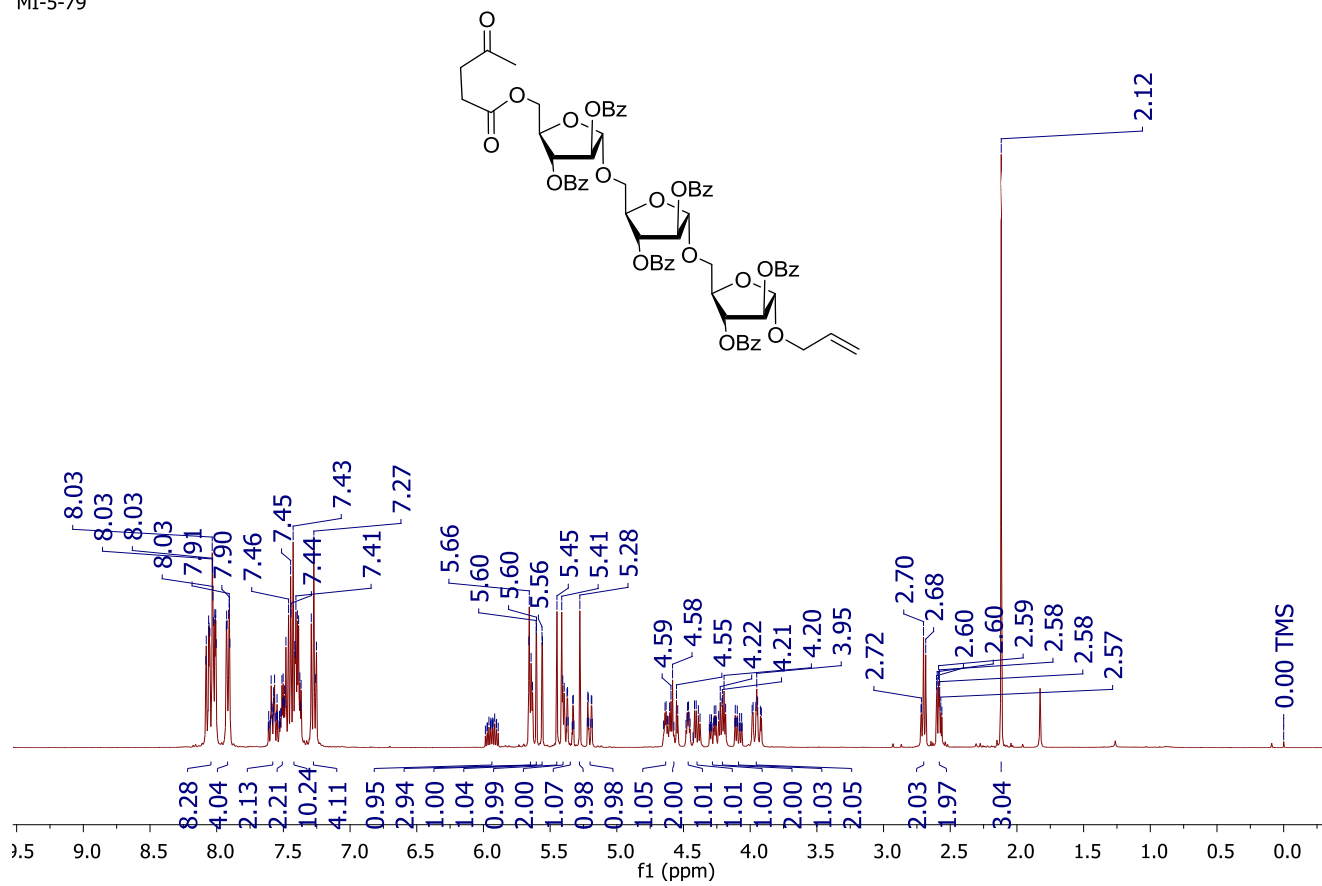

<sup>13</sup>C NMR Spectrum (100.53 MHz, CDCl<sub>3</sub>) of Compound **15b**

20160328-MI-5-79/41  
MI-5-79

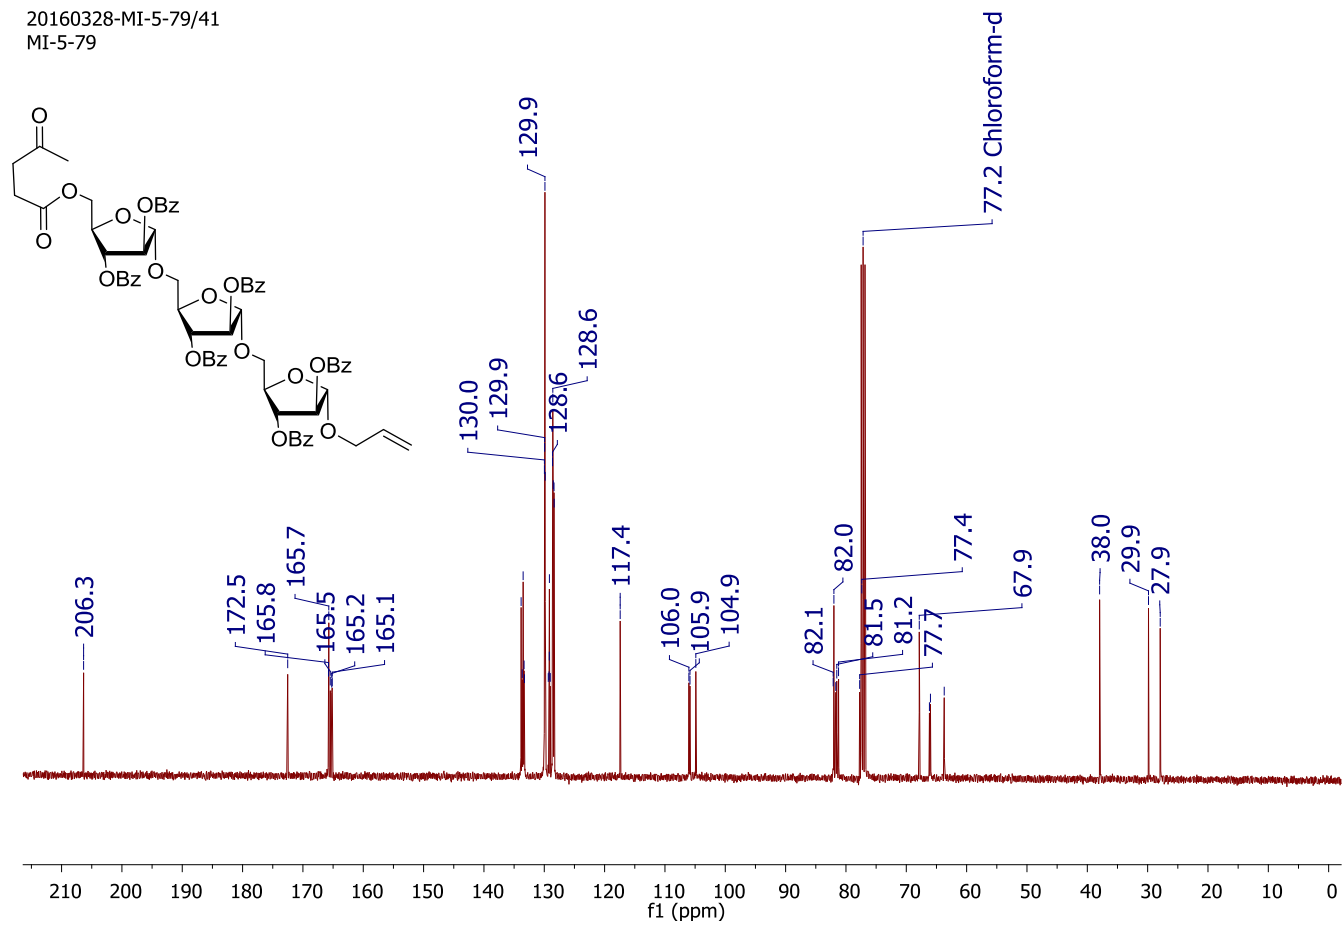

# DEPT Spectrum (100.53 MHz, CDCl<sub>3</sub>) of Compound **15b**

20160328-MI-5-79/42  
MI-5-79

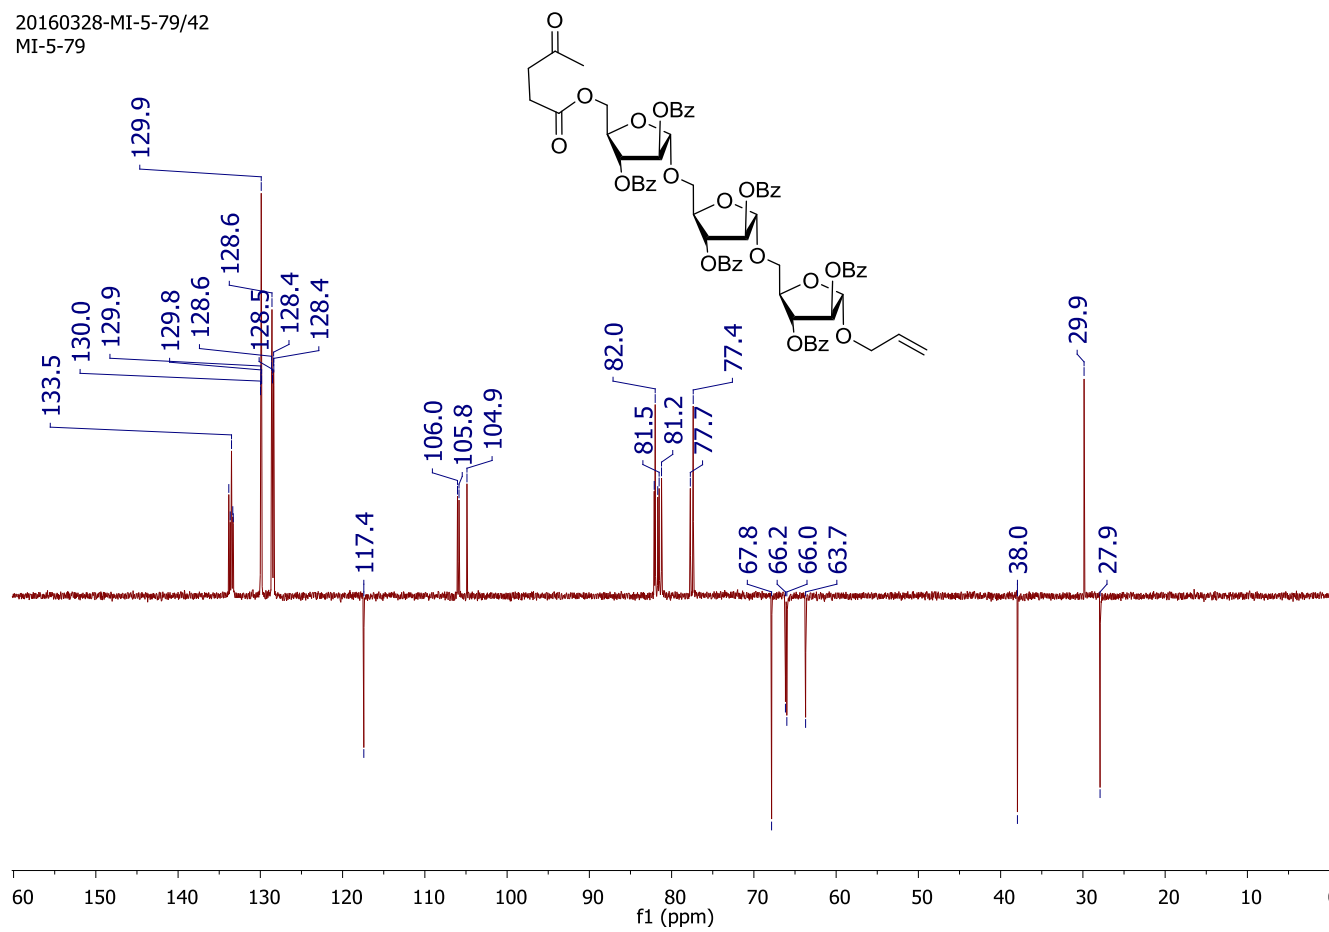

<sup>1</sup>H NMR Spectrum (399.78 MHz, CDCl<sub>3</sub>) of Compound **5a**

20160330-MI-5-80.9.fid  
MI-5-80

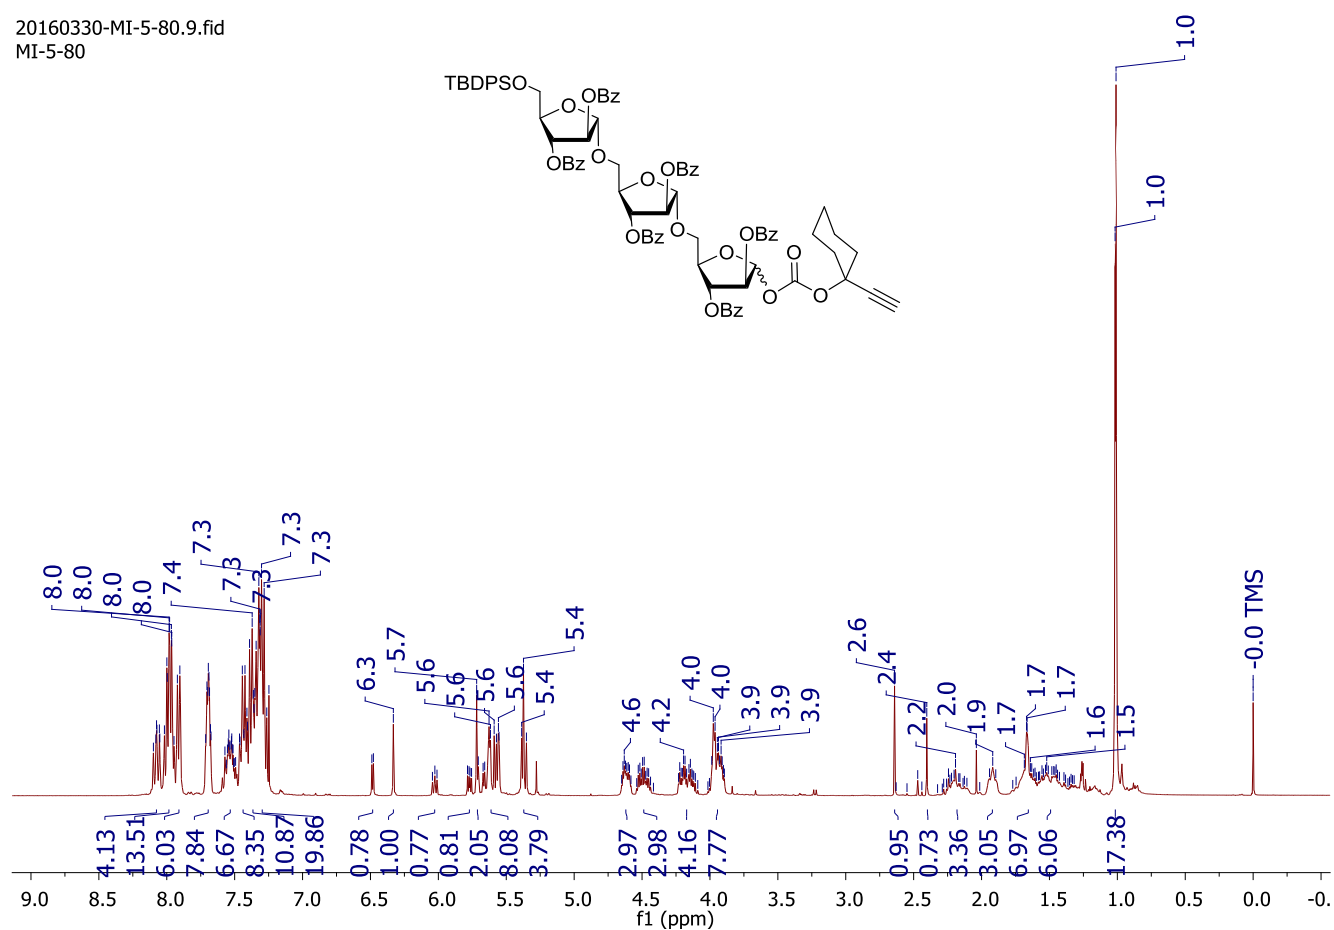

# <sup>13</sup>C NMR Spectrum (100.53 MHz, CDCl<sub>3</sub>) of Compound 5a

20160330-MI-5-80.11.fid  
MI-5-80

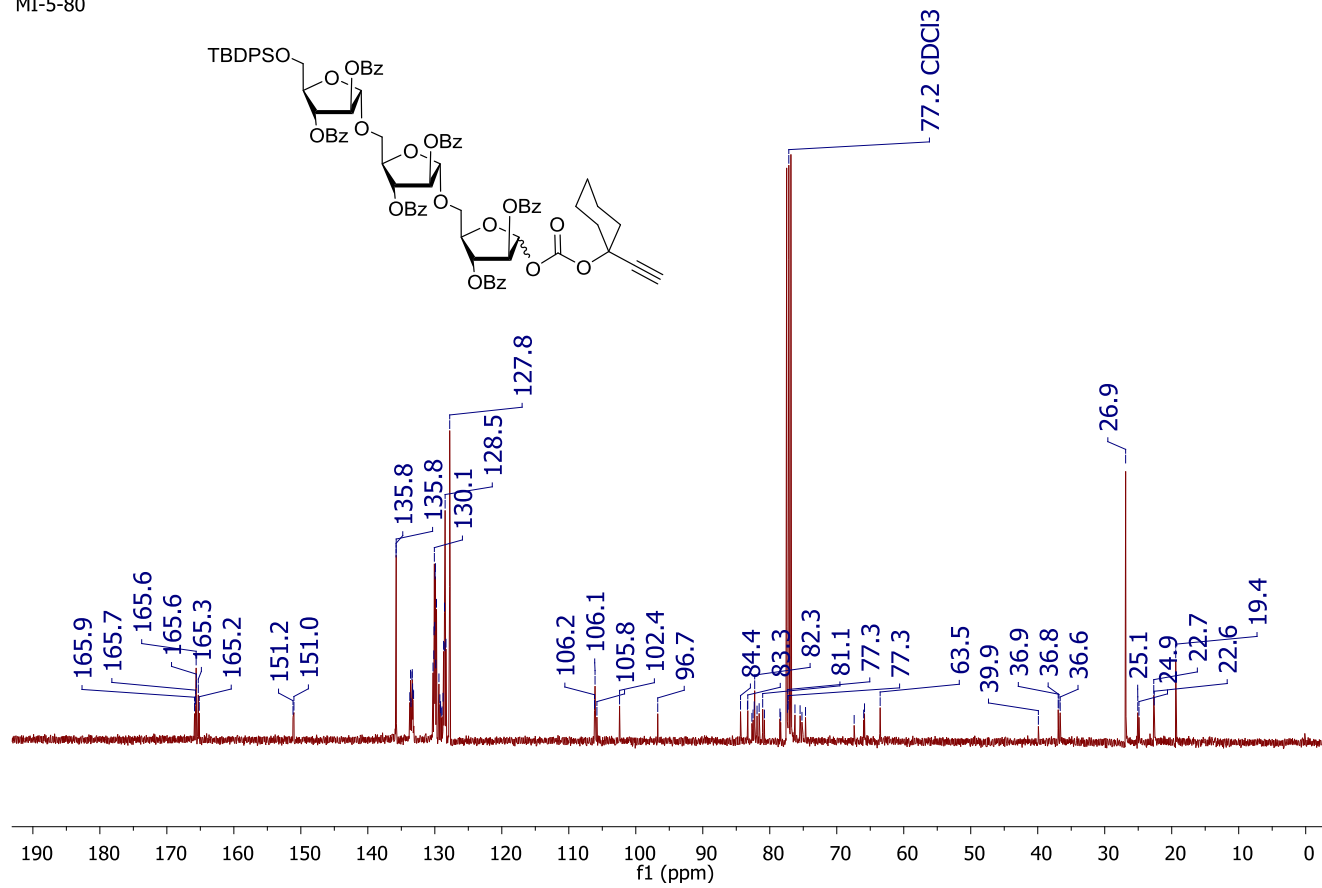





<sup>1</sup>H NMR Spectrum (399.78 MHz, CDCl<sub>3</sub>) of Compound **5b**

20160426-MI-5-81.1.fid  
MI-5-81

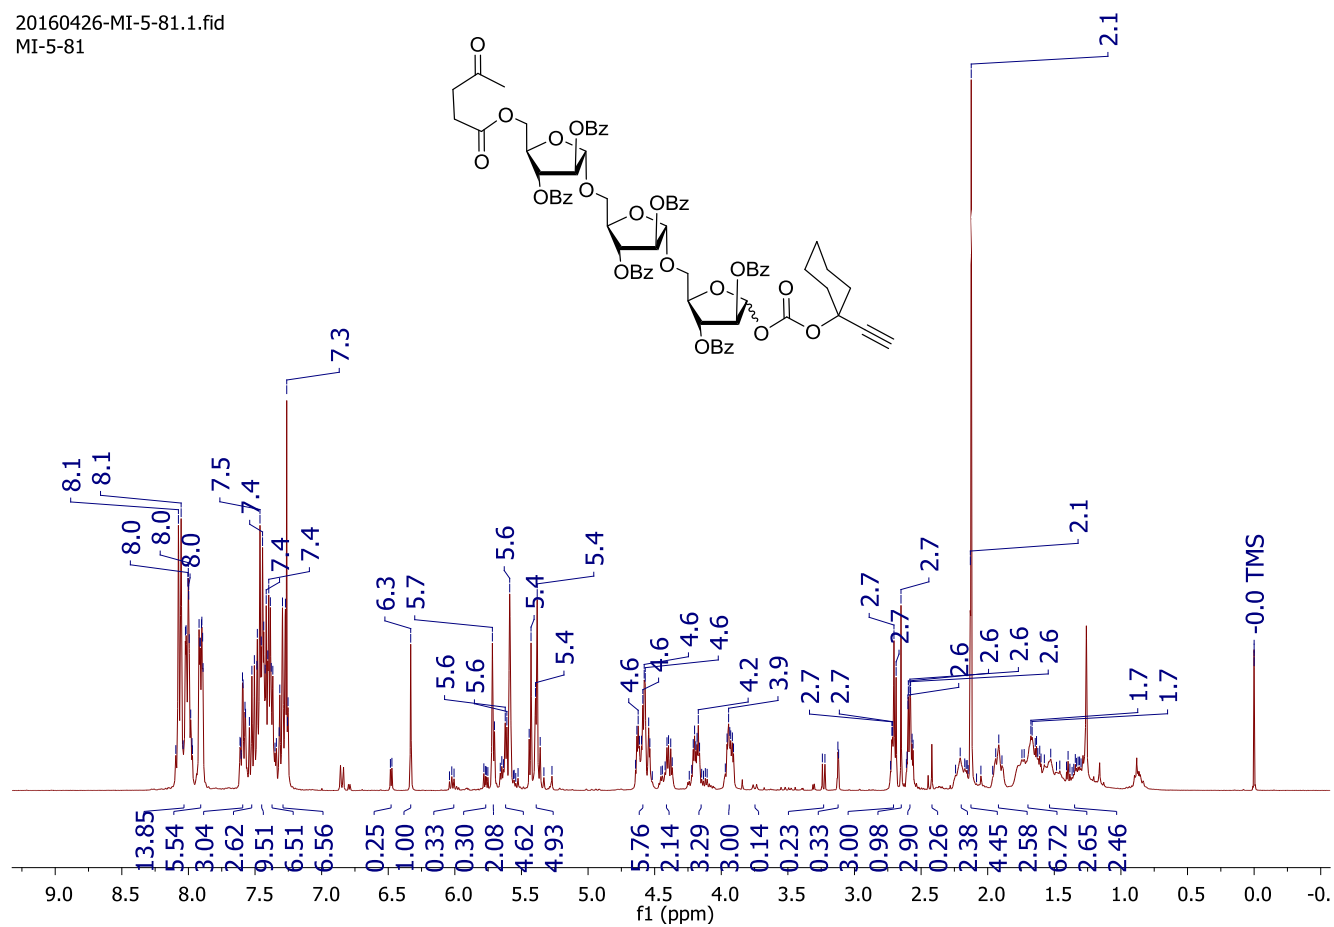

# <sup>13</sup>C NMR Spectrum (100.53 MHz, CDCl<sub>3</sub>) of Compound **5b**

20160426-MI-5-81.2.fid  
MI-5-81

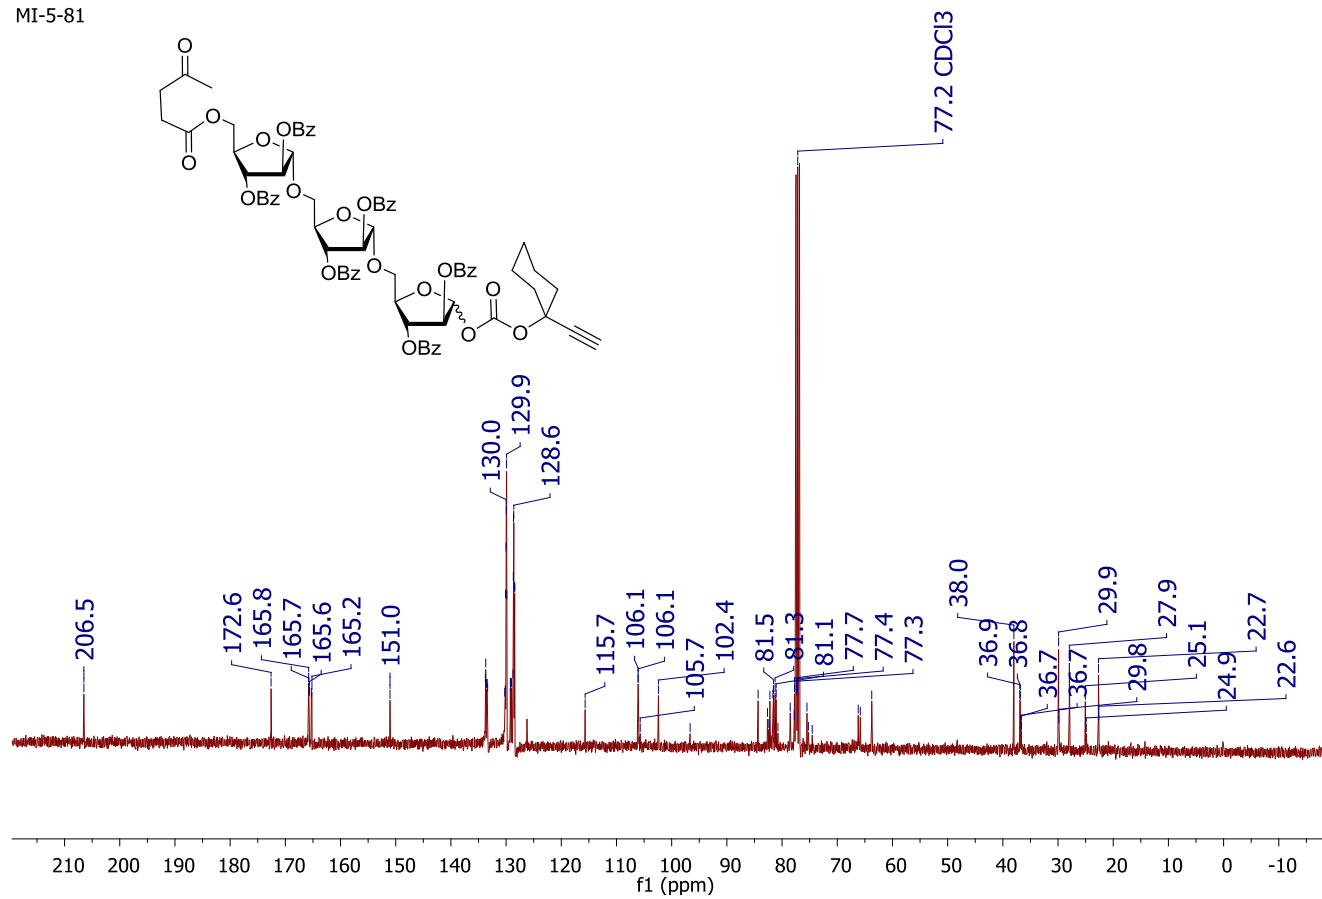

# DEPT Spectrum (100.53 MHz, CDCl<sub>3</sub>) of Compound **5b**

20160426-MI-5-81.3.fid  
MI-5-81

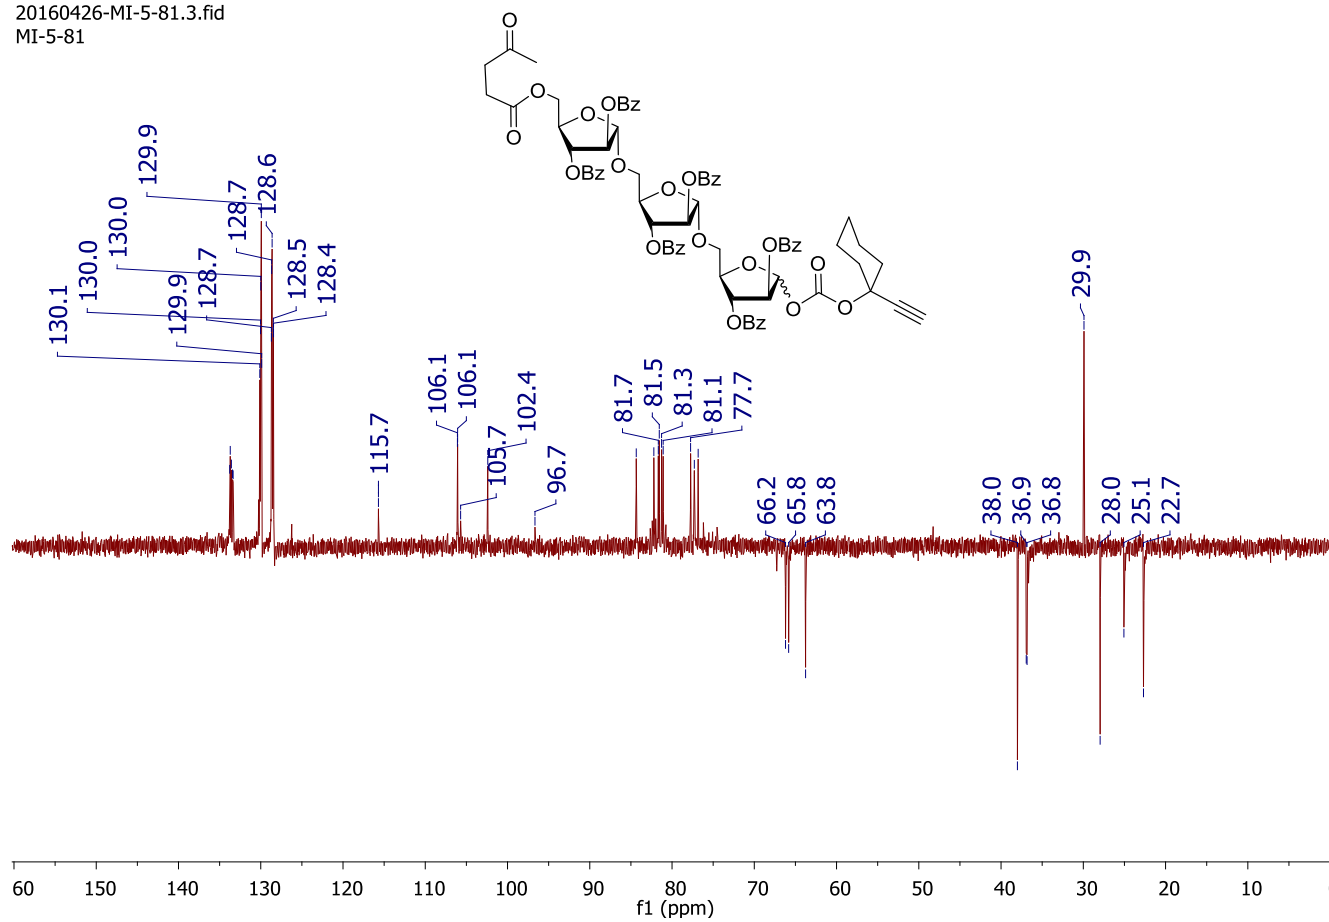

<sup>1</sup>H NMR Spectrum (399.78 MHz, CDCl<sub>3</sub>) of Compound 17

20160613-MI-5-107C

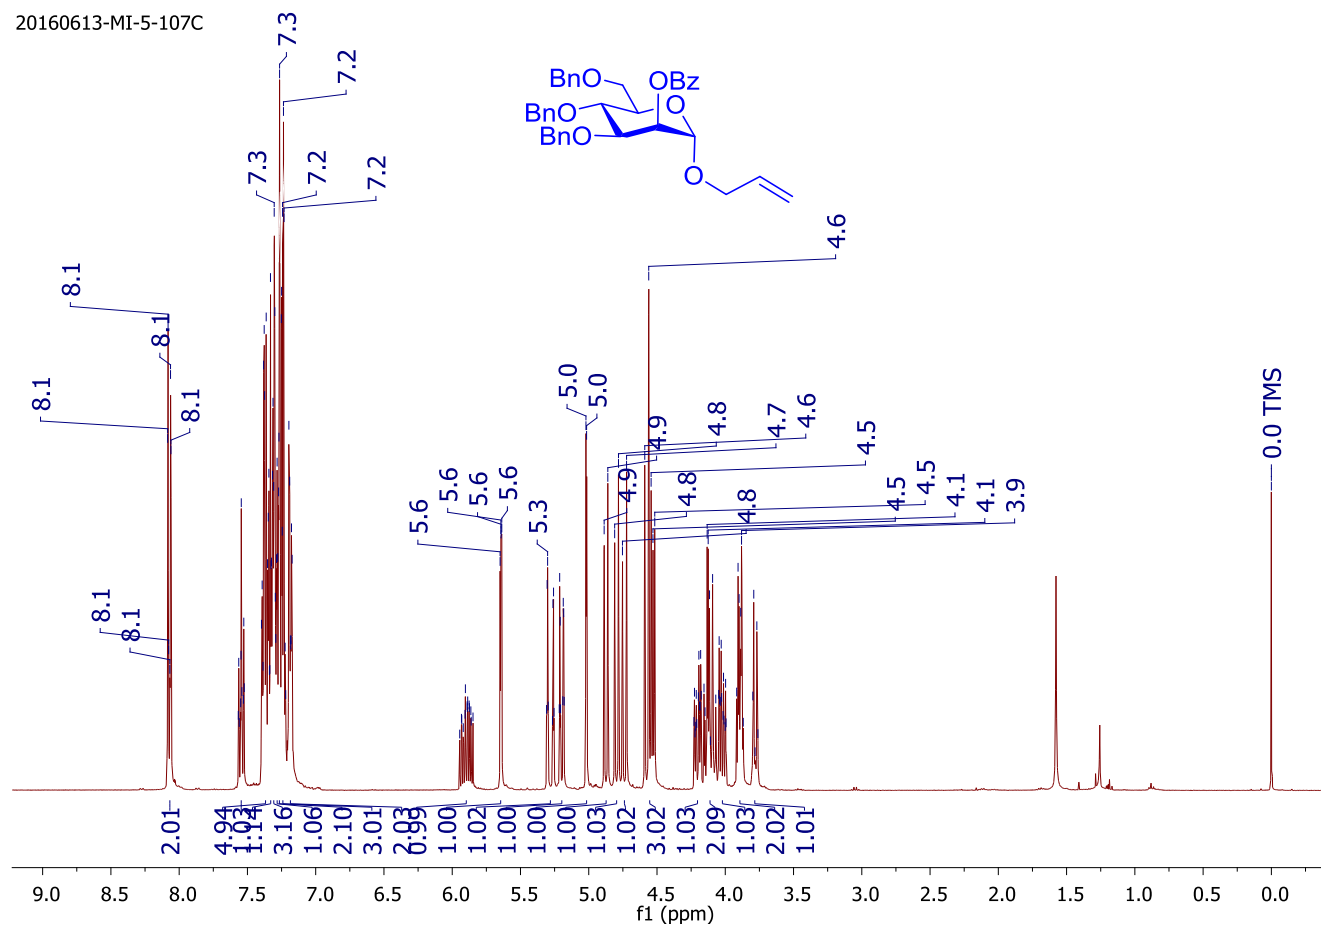

<sup>13</sup>C NMR Spectrum (100.53 MHz, CDCl<sub>3</sub>) of Compound 17

20160613-MI-5-107C

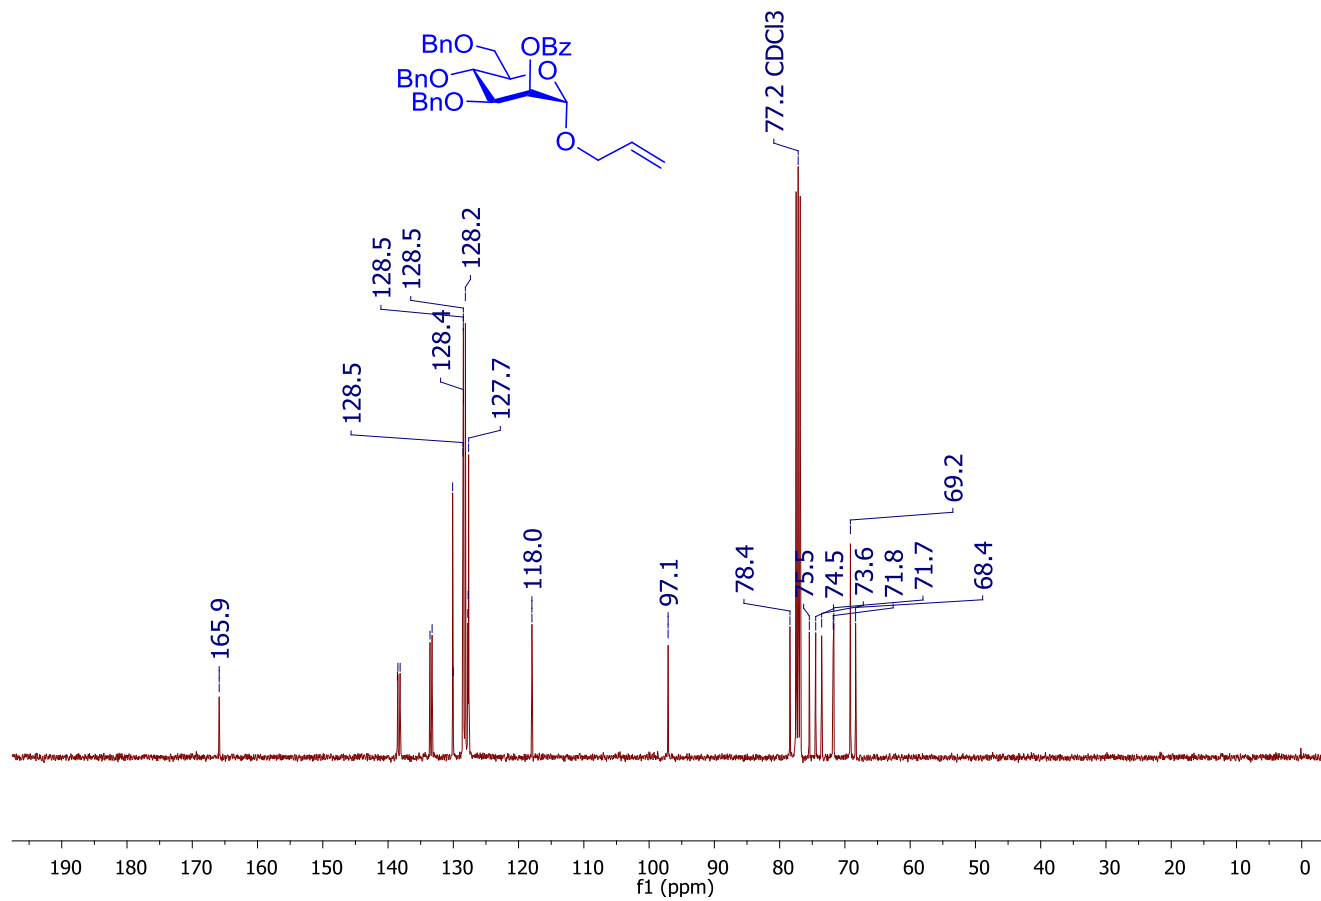

DEPT Spectrum (100.53 MHz, CDCl<sub>3</sub>) of Compound 17

20160613-MI-5-107C

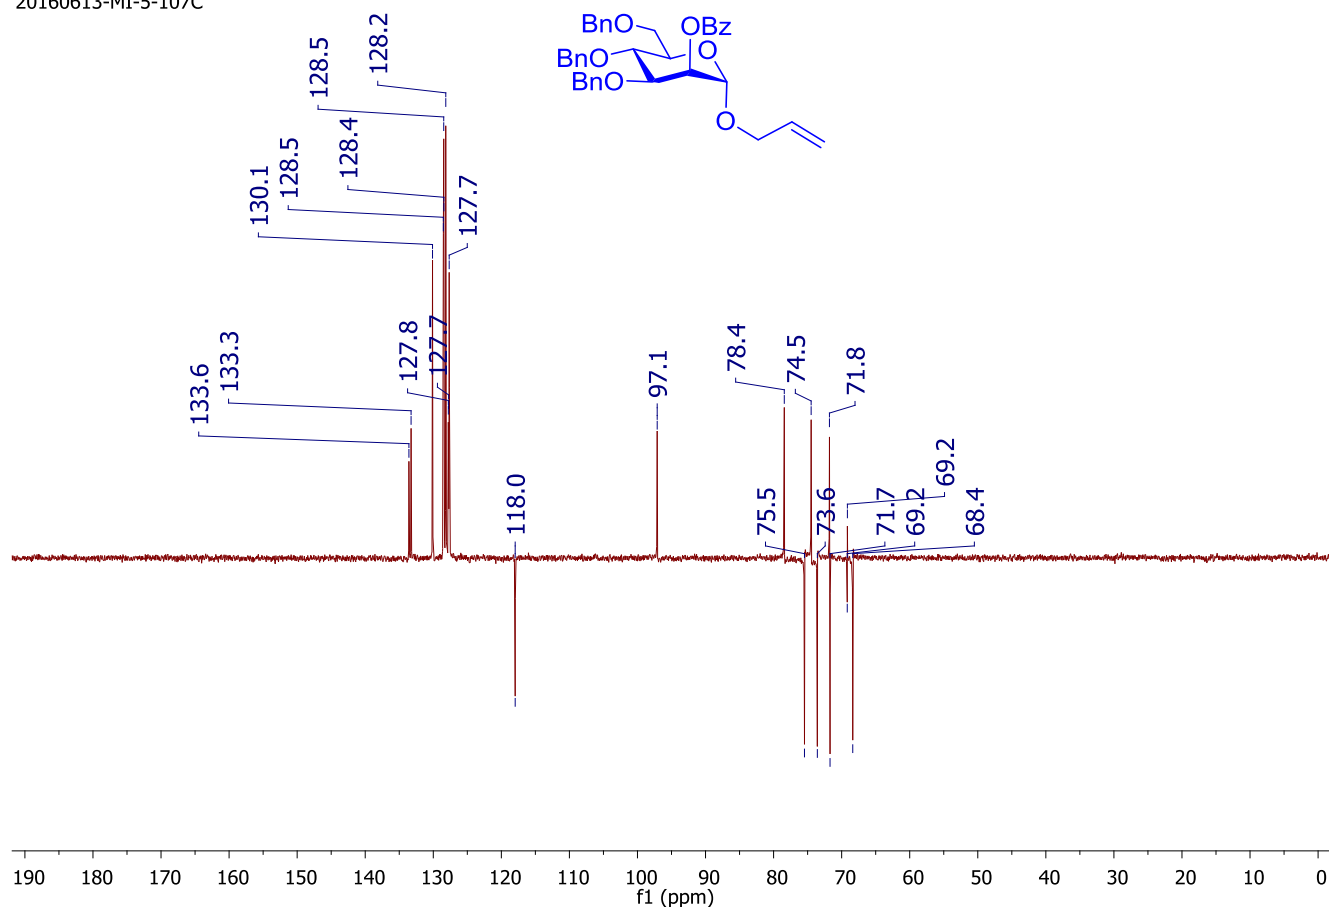

<sup>1</sup>H NMR Spectrum (399.78 MHz, CDCl<sub>3</sub>) of Compound **18**

20160426-MI-5-97.8.fid  
MI-5-97

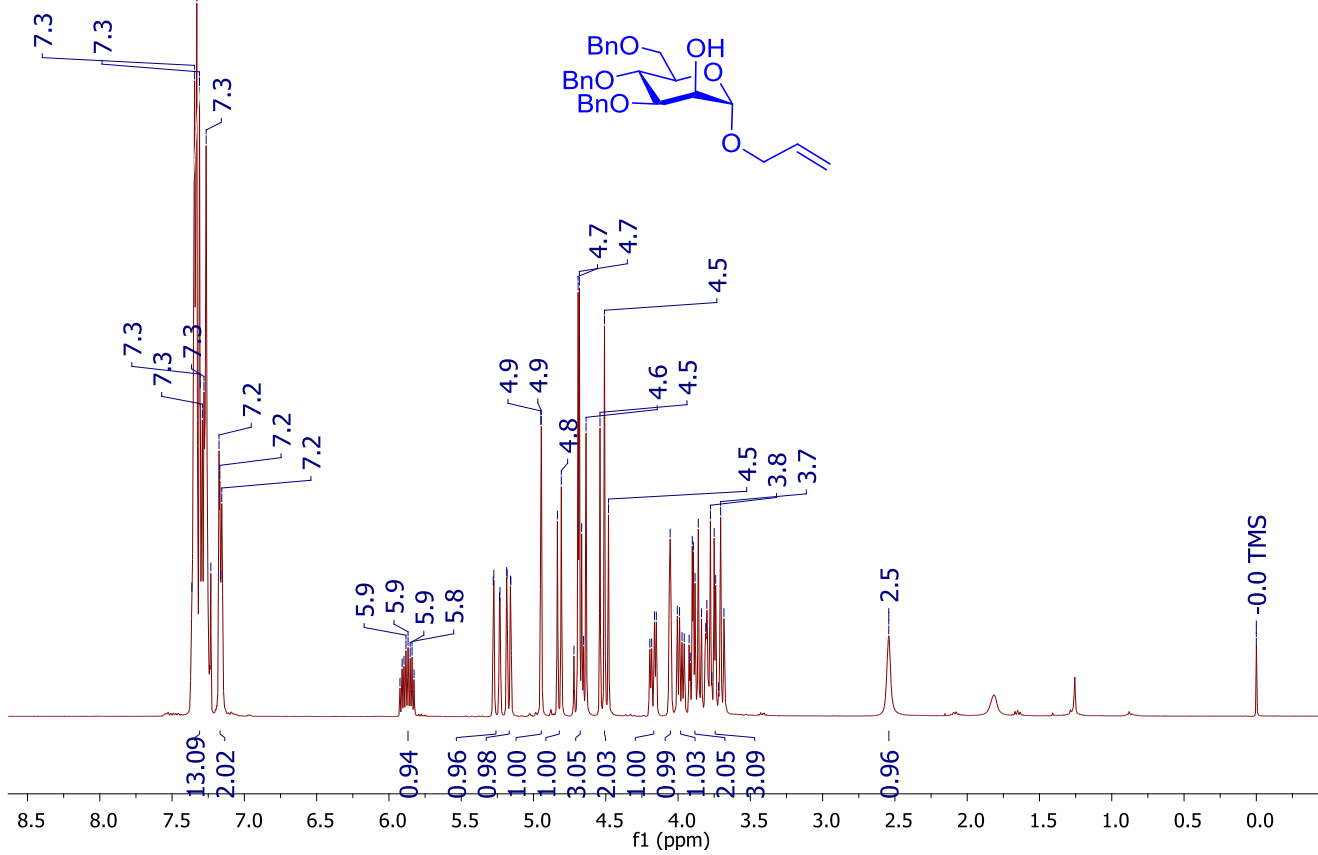



# <sup>13</sup>C NMR Spectrum (100.53 MHz, CDCl<sub>3</sub>) of Compound **18**

20160426-MI-5-97.9.fid  
MI-5-97

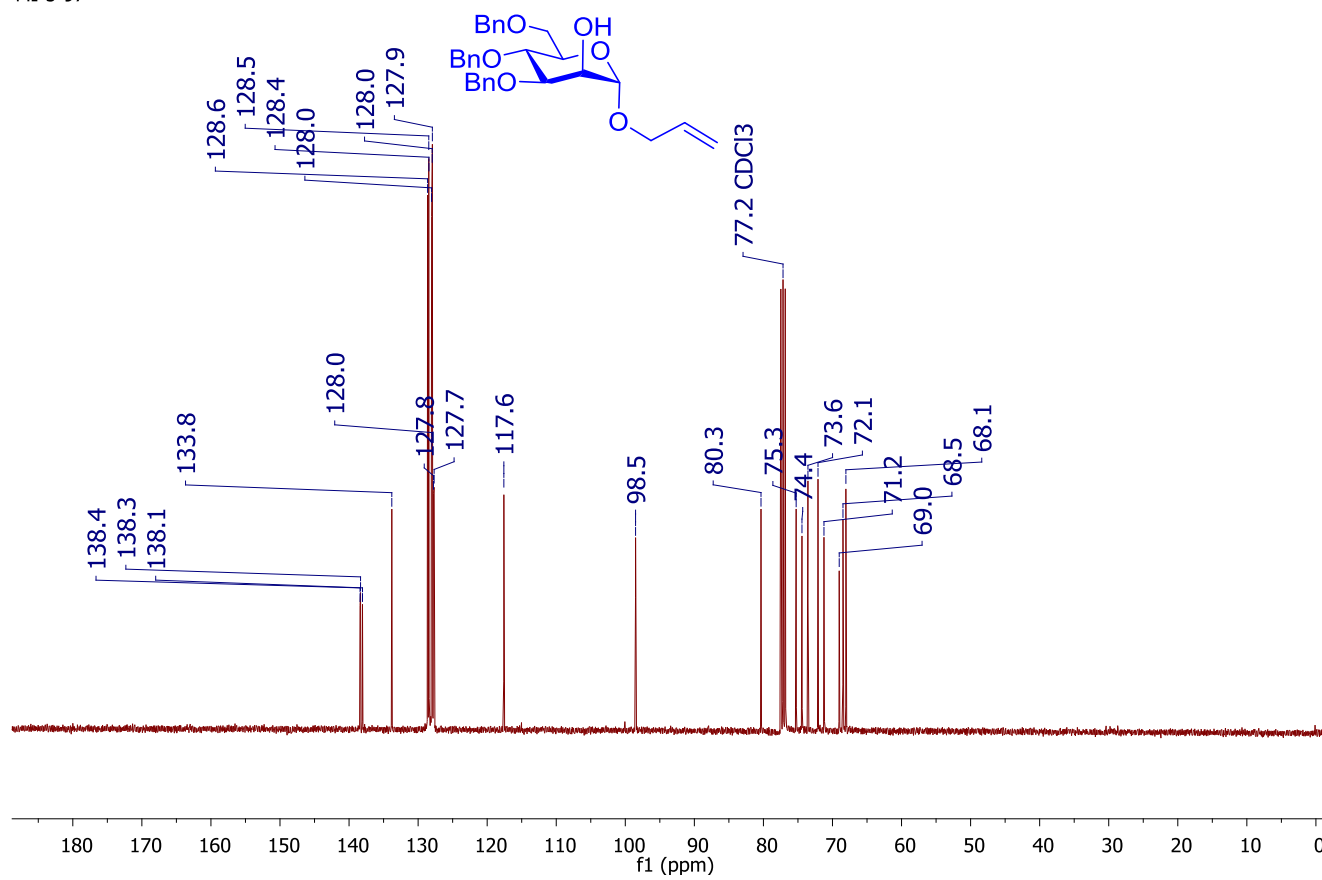

# DEPT Spectrum (100.53 MHz, CDCl<sub>3</sub>) of Compound **18**

20160426-MI-5-97.10.fid  
MI-5-97

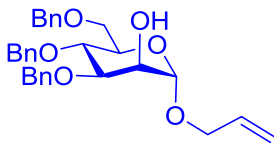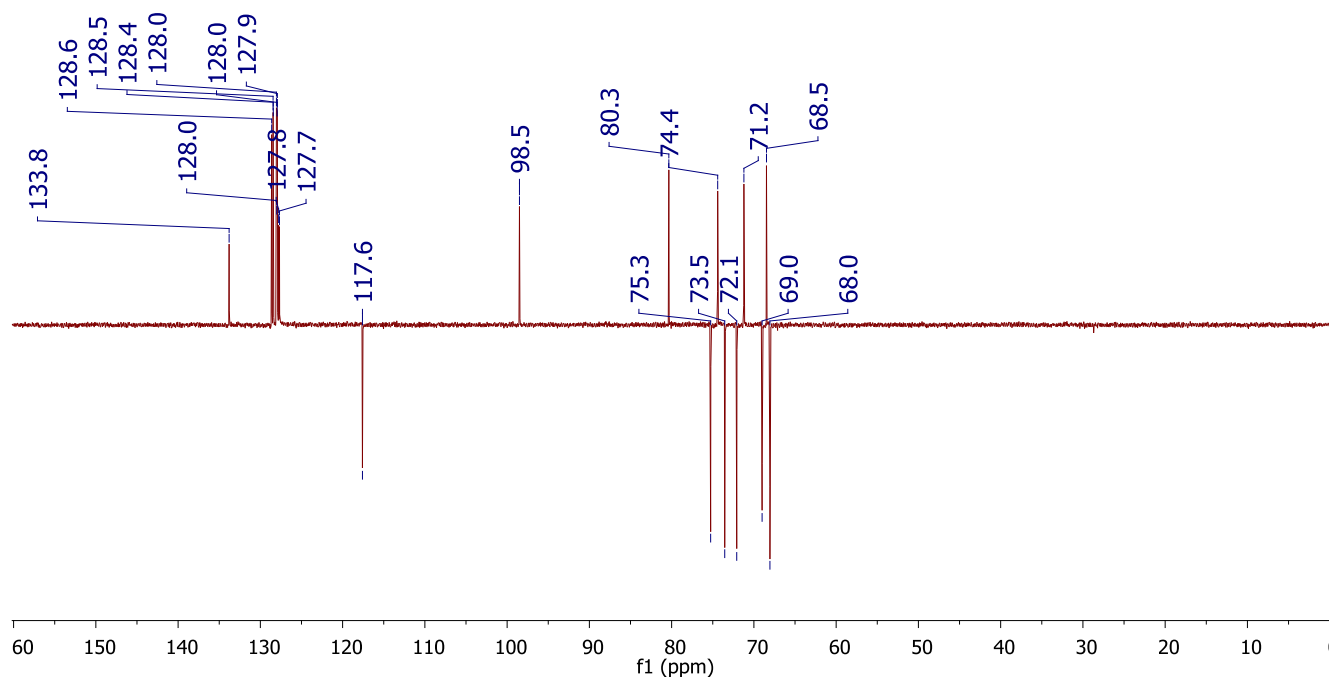



<sup>13</sup>C NMR Spectrum (100.53 MHz, CDCl<sub>3</sub>) of Compound **19**

20160425-MI-5-69.69.fid  
MI-5-69

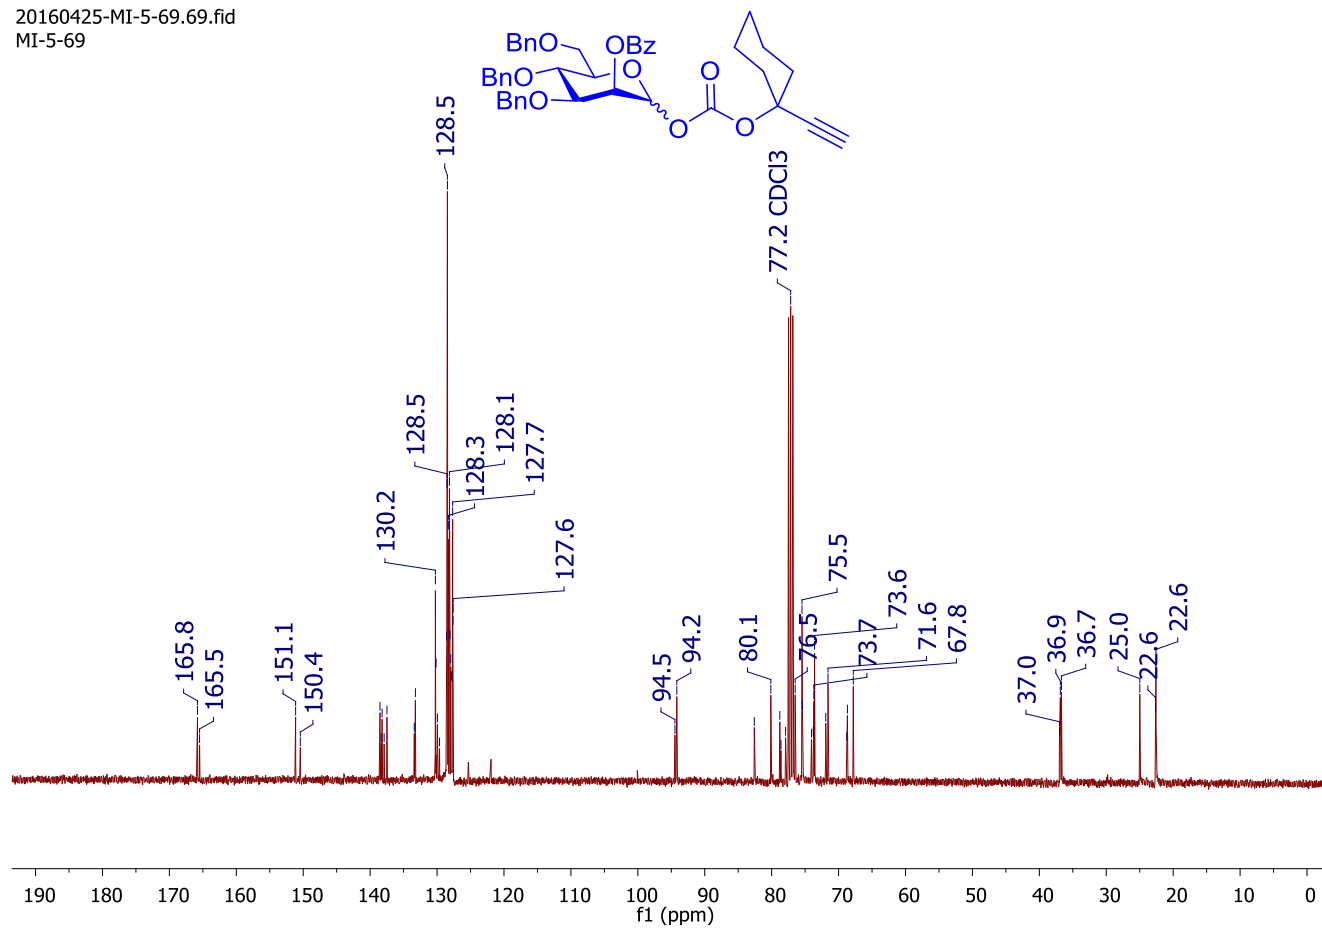

# DEPT Spectrum (100.53 MHz, CDCl<sub>3</sub>) of Compound 19

20160425-MI-5-69.70.fid  
MI-5-69

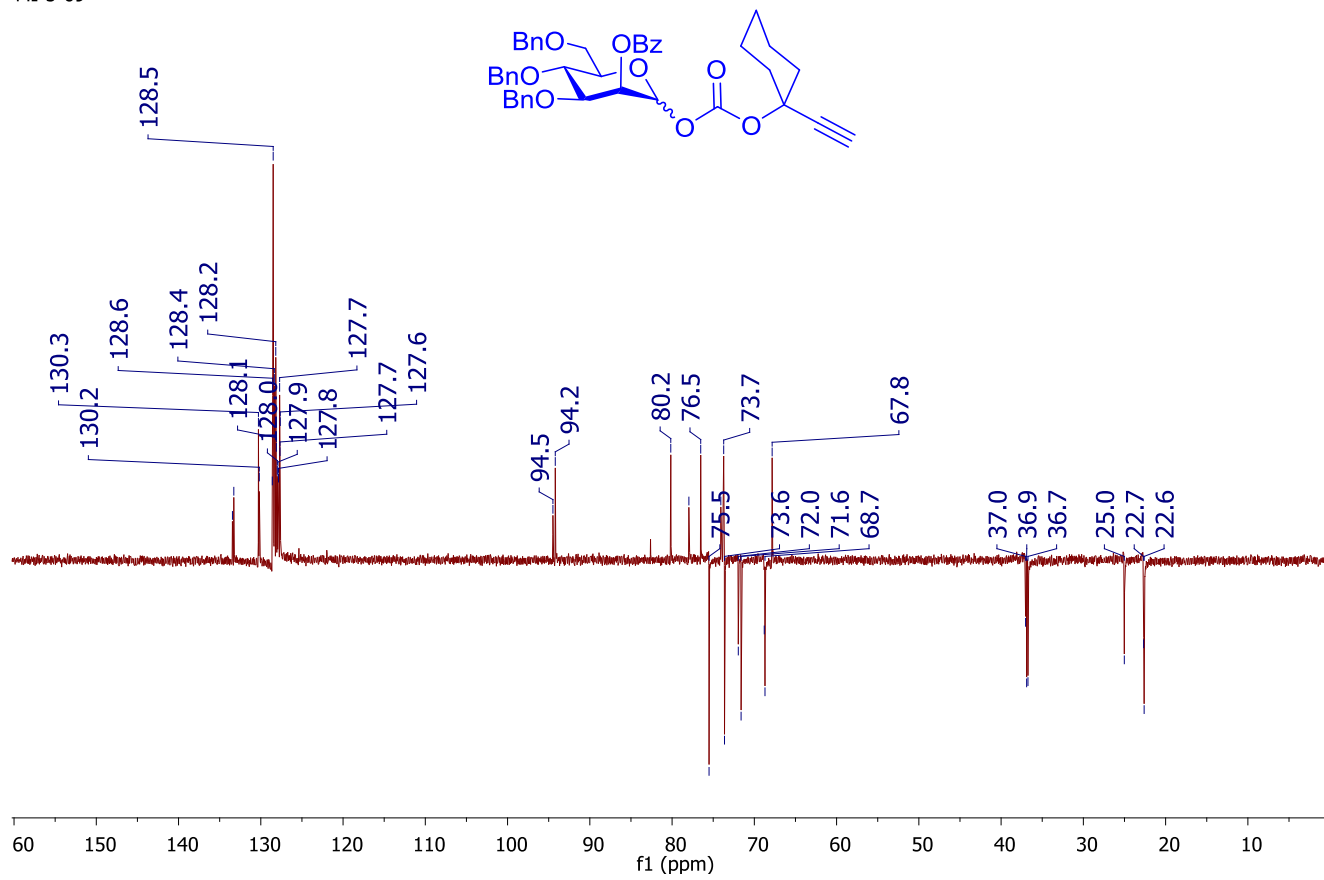

<sup>1</sup>H NMR Spectrum (399.78 MHz, CDCl<sub>3</sub>) of Compound **20**

20160426-MI-5-97A.fid  
MI-5-97A

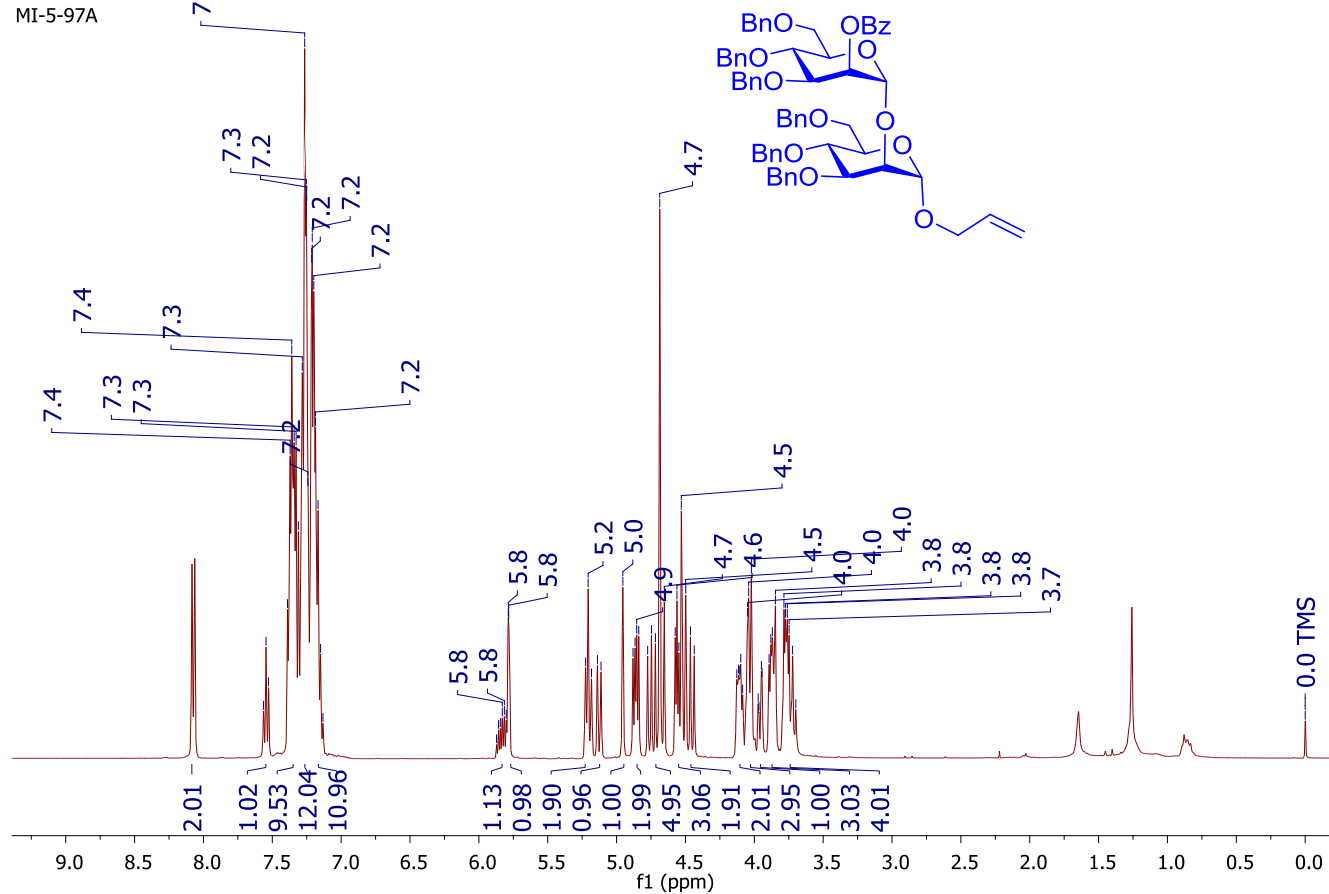

<sup>13</sup>C NMR Spectrum (100.53 MHz, CDCl<sub>3</sub>) of Compound **20**

20160426-MI-5-97A.6.fid  
MI-5-97A

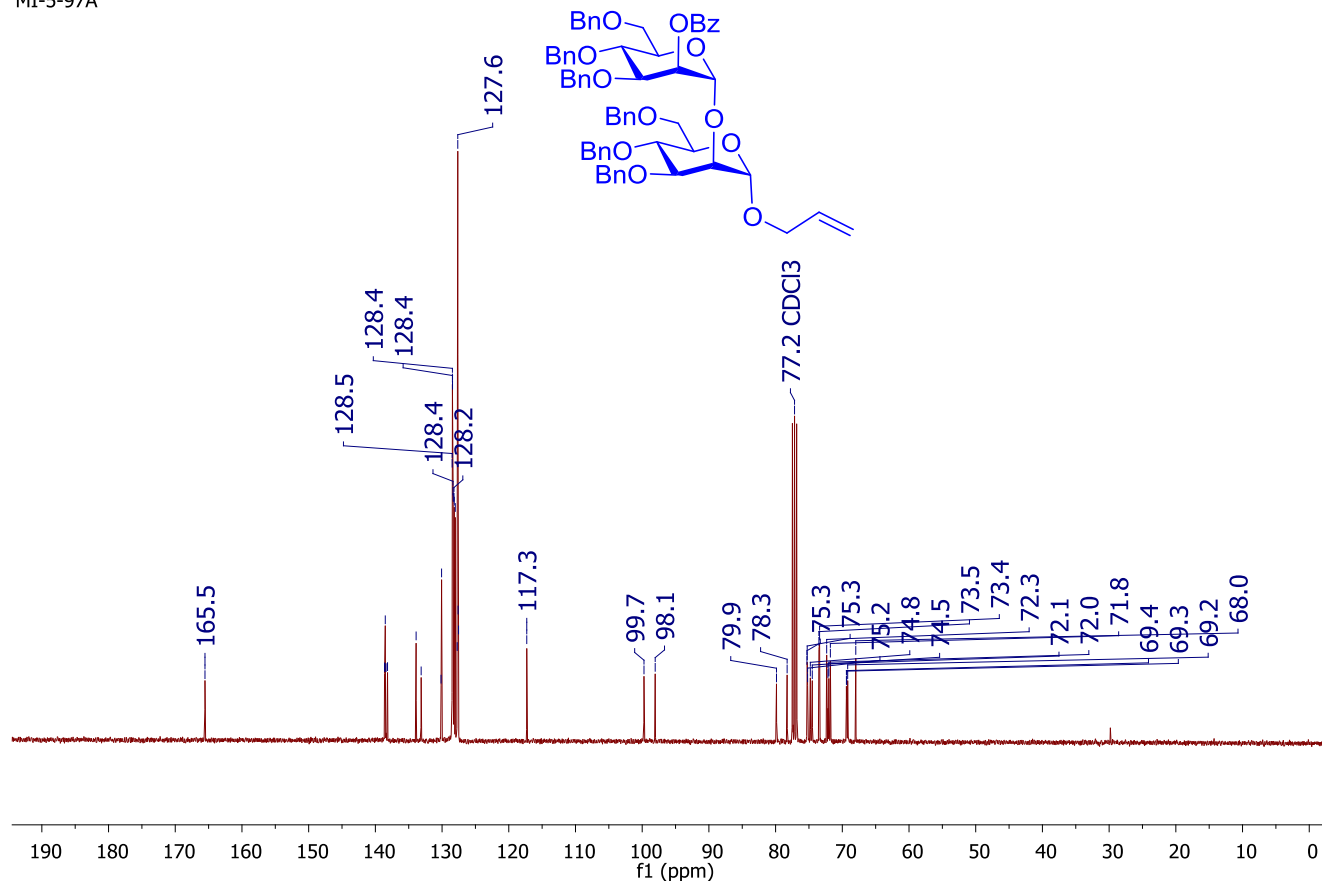

# DEPT Spectrum (100.53 MHz, CDCl<sub>3</sub>) of Compound **20**

20160426-MI-5-97A.7.fid  
MI-5-97A

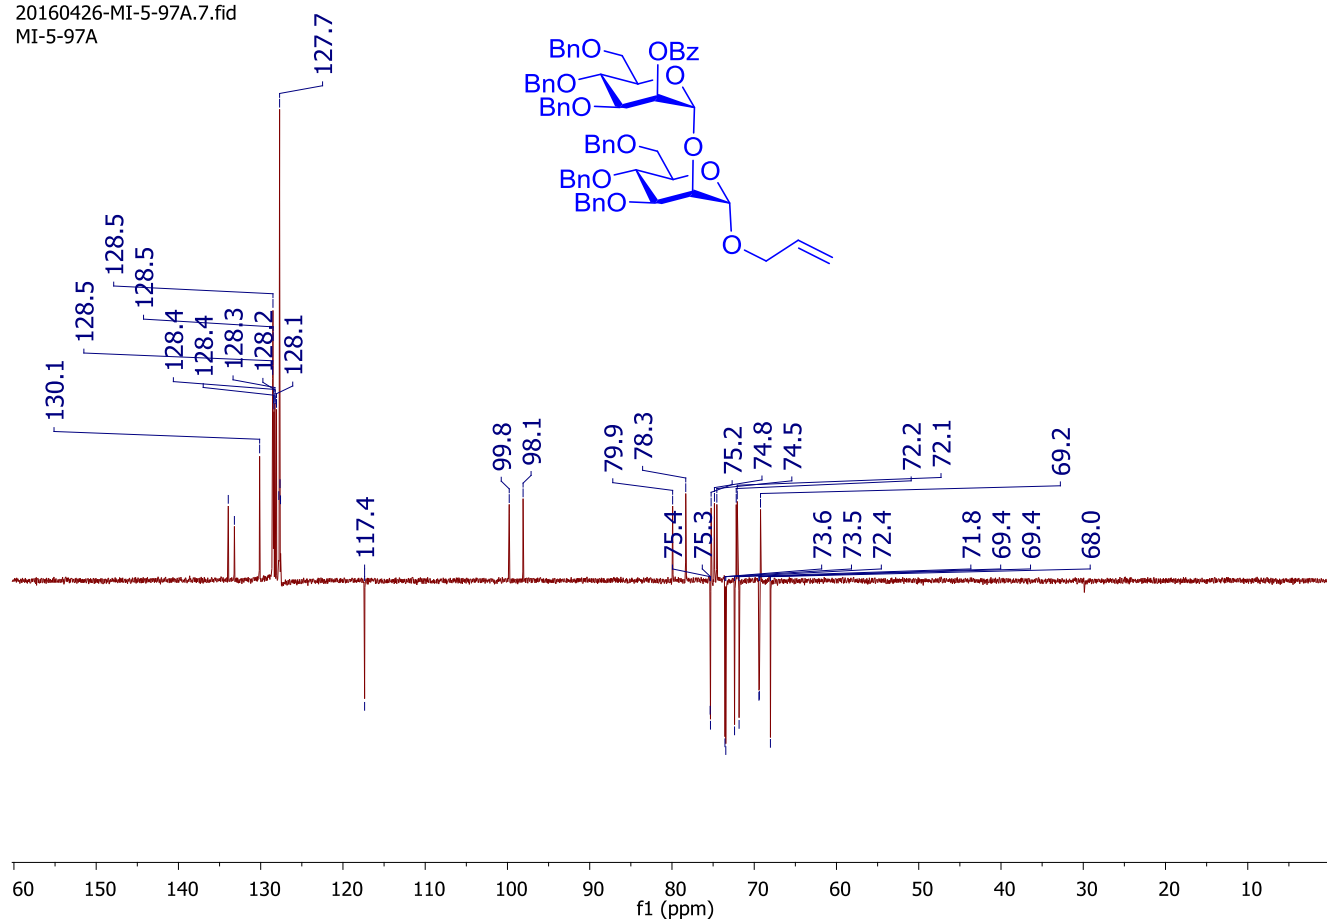



<sup>1</sup>H NMR Spectrum (399.78 MHz, CDCl<sub>3</sub>) of Compound 2

20150322-MI-5-72.3.fid  
MI-5-72

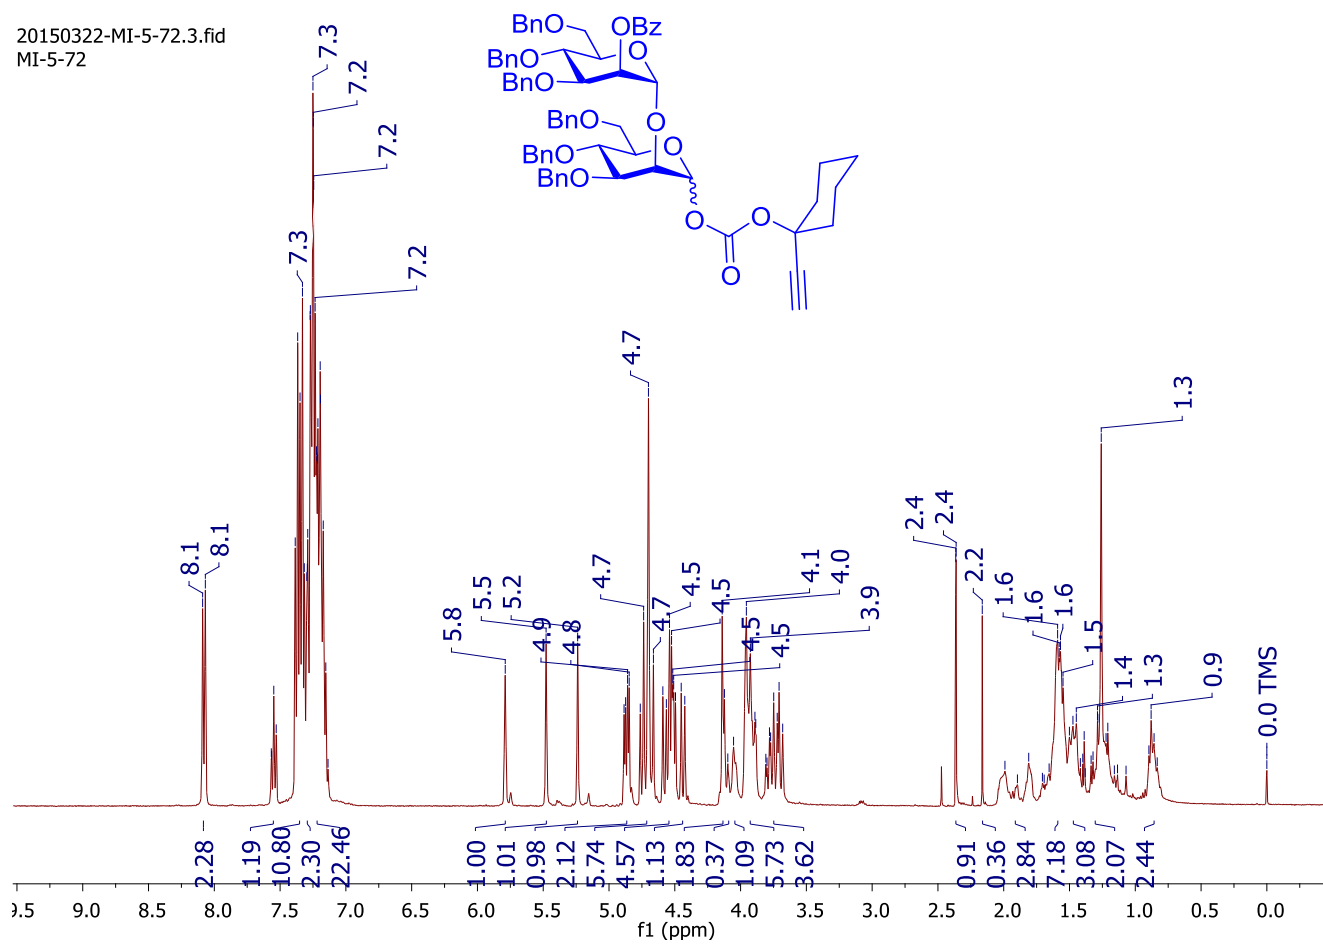

<sup>13</sup>C NMR Spectrum (100.53 MHz, CDCl<sub>3</sub>) of Compound 2

20160416-MI-5-72.3.fid  
MI-5-72

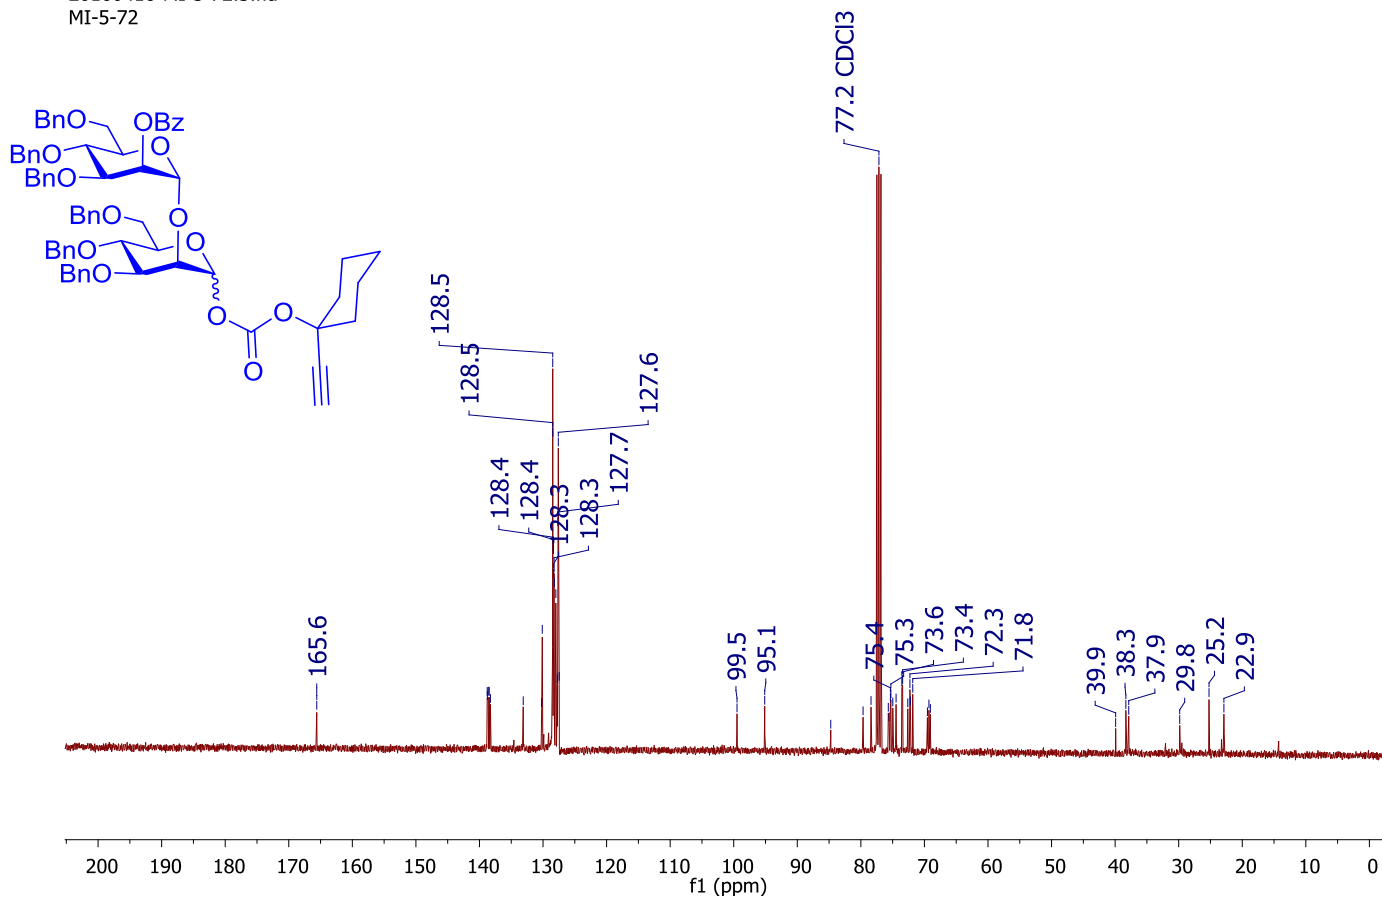

# DEPT Spectrum (100.53 MHz, CDCl<sub>3</sub>) of Compound 2

20160416-MI-5-72.4.fid  
MI-5-72

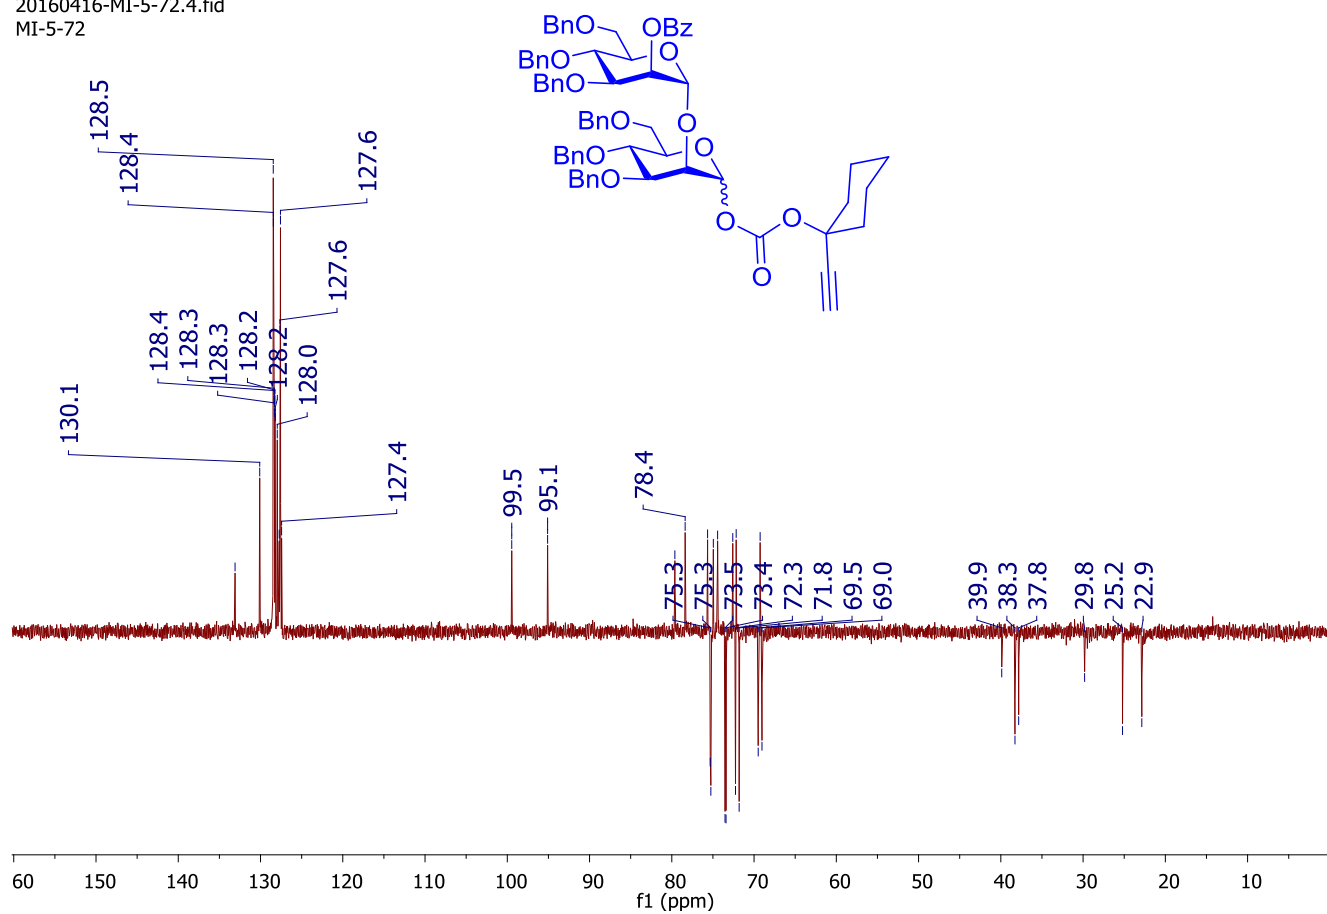

<sup>1</sup>H NMR Spectrum (399.78 MHz, CDCl<sub>3</sub>) of Compound **21**

20160513-GPS-174

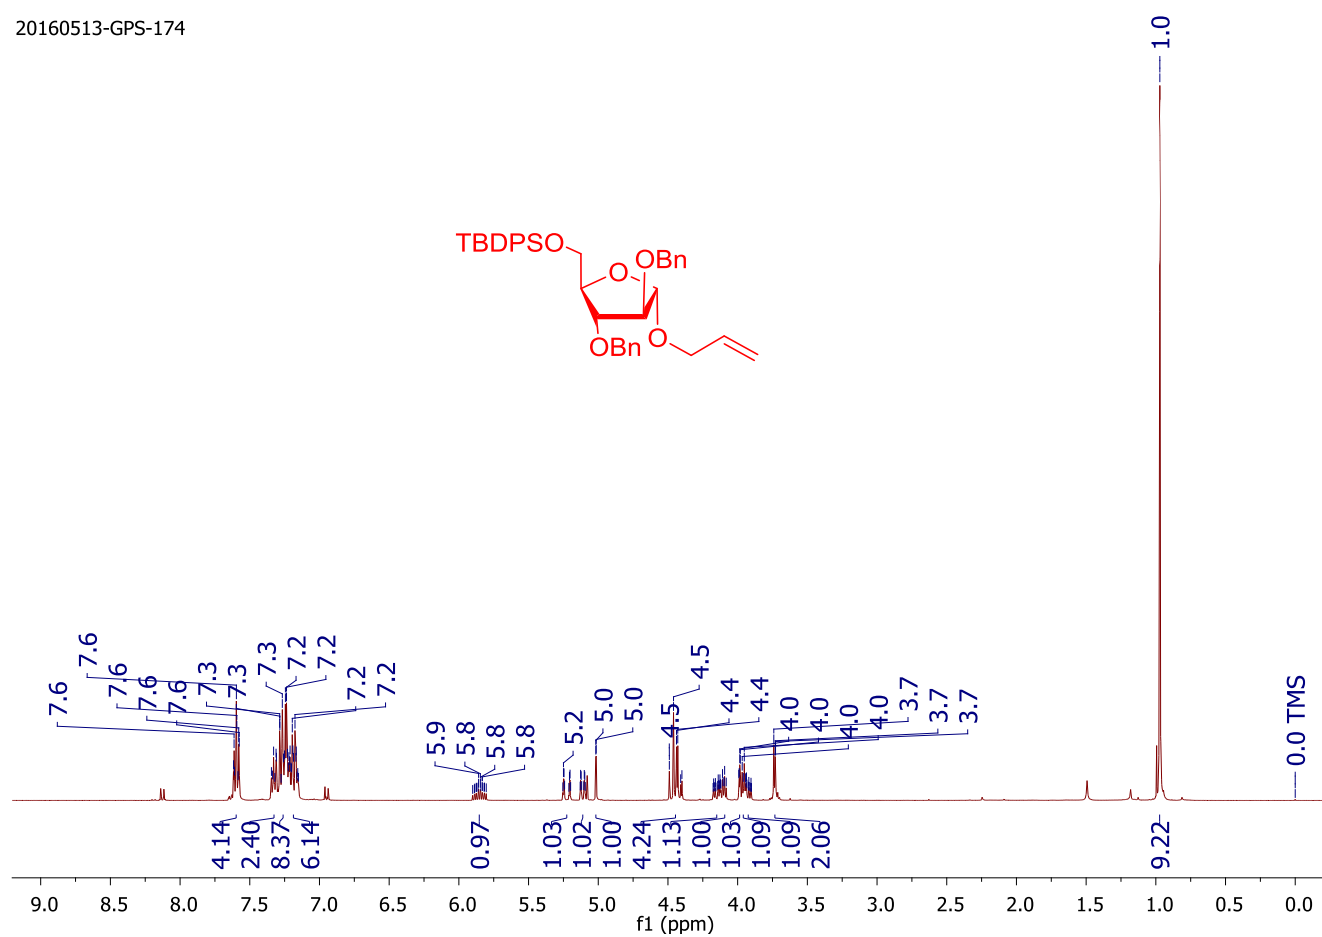

<sup>13</sup>C NMR Spectrum (100.53 MHz, CDCl<sub>3</sub>) of Compound **21**

20160513-GPS-174

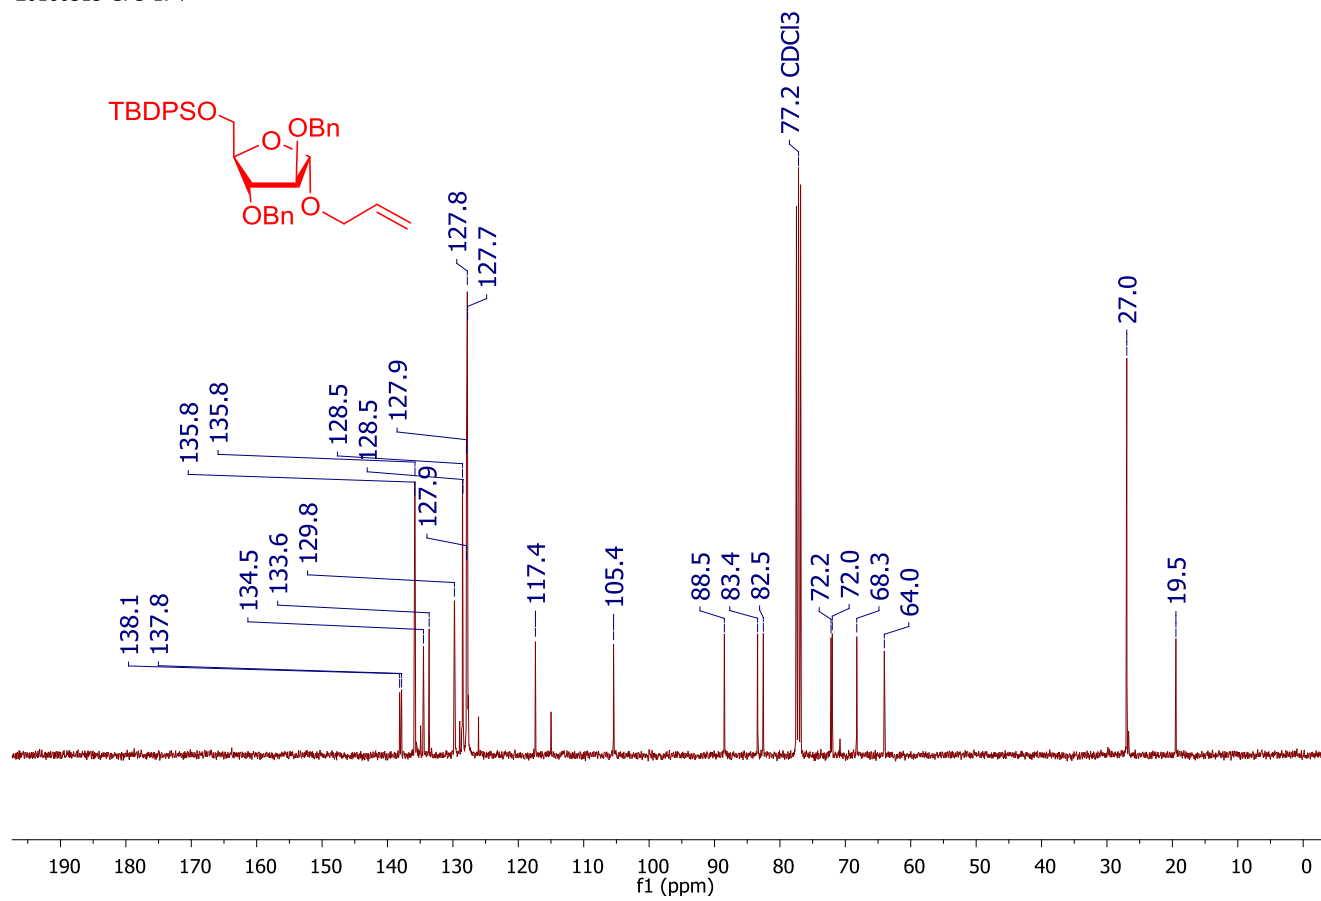

# DEPT Spectrum (100.53 MHz, CDCl<sub>3</sub>) of Compound **21**

20160513-GPS-174

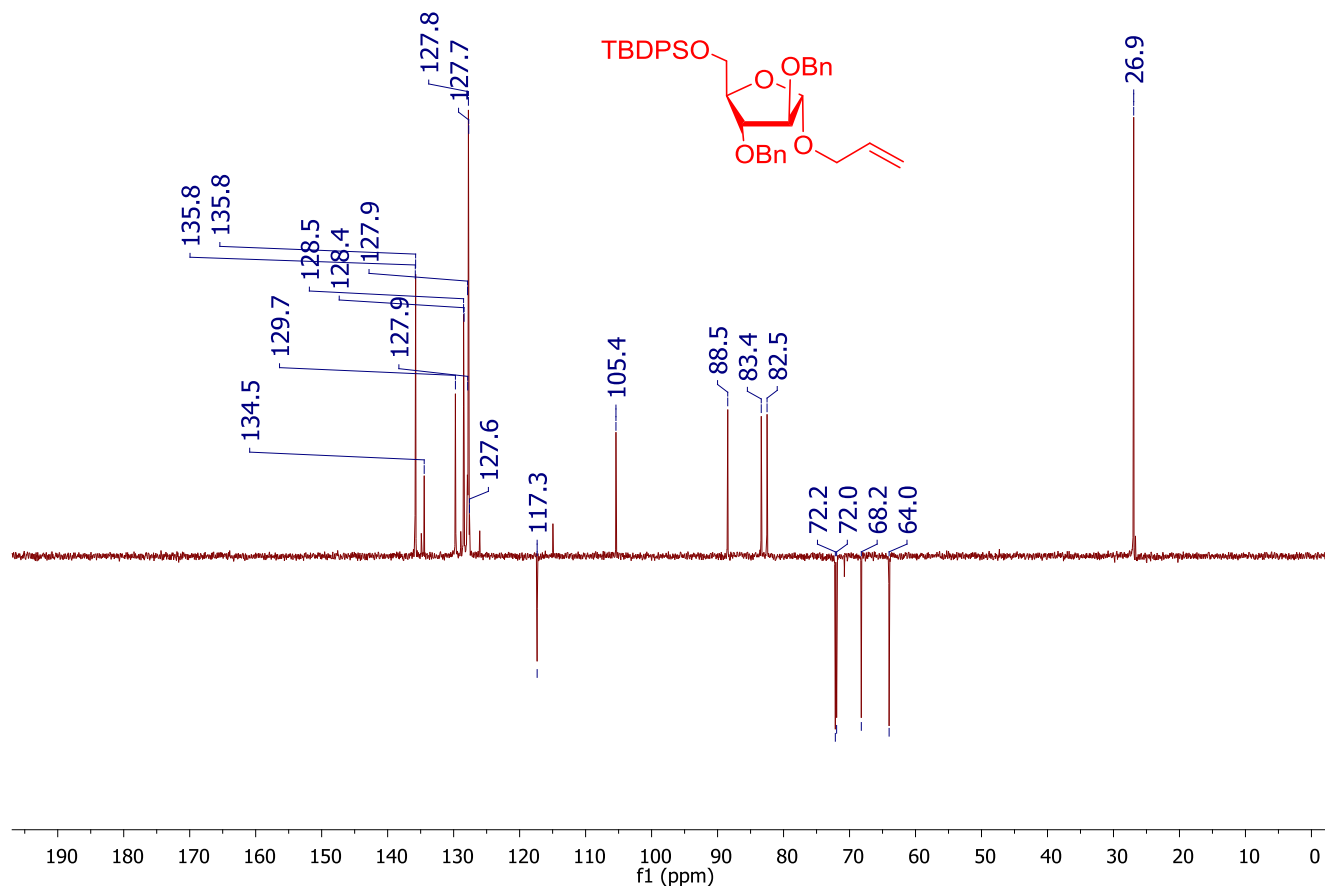

<sup>1</sup>H NMR Spectrum (399.78 MHz, CDCl<sub>3</sub>) of Compound **22**

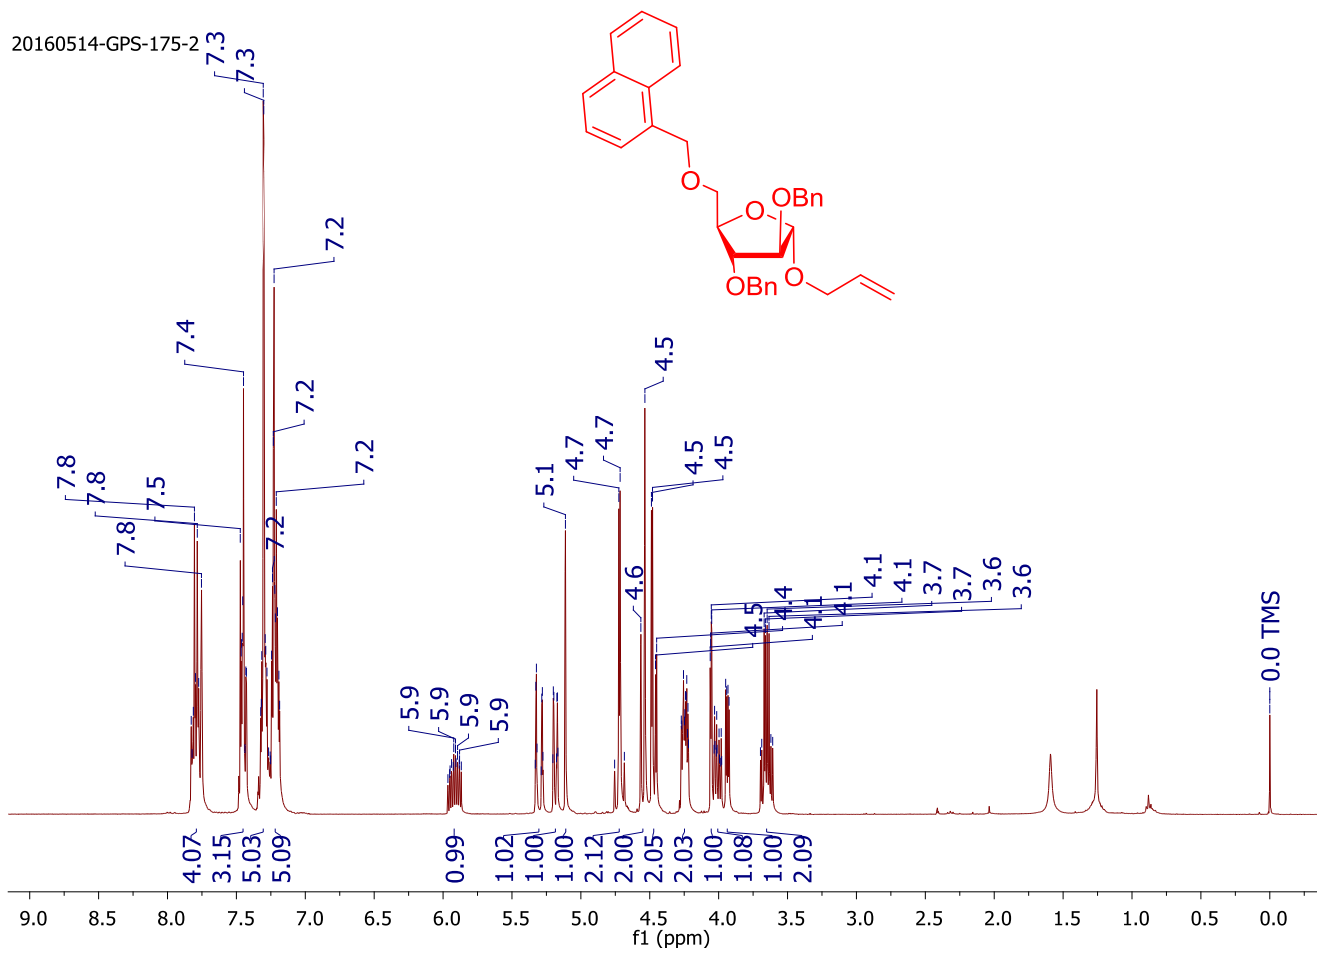

<sup>13</sup>C NMR Spectrum (100.53 MHz, CDCl<sub>3</sub>) of Compound **22**

20160514-GPS-175-2

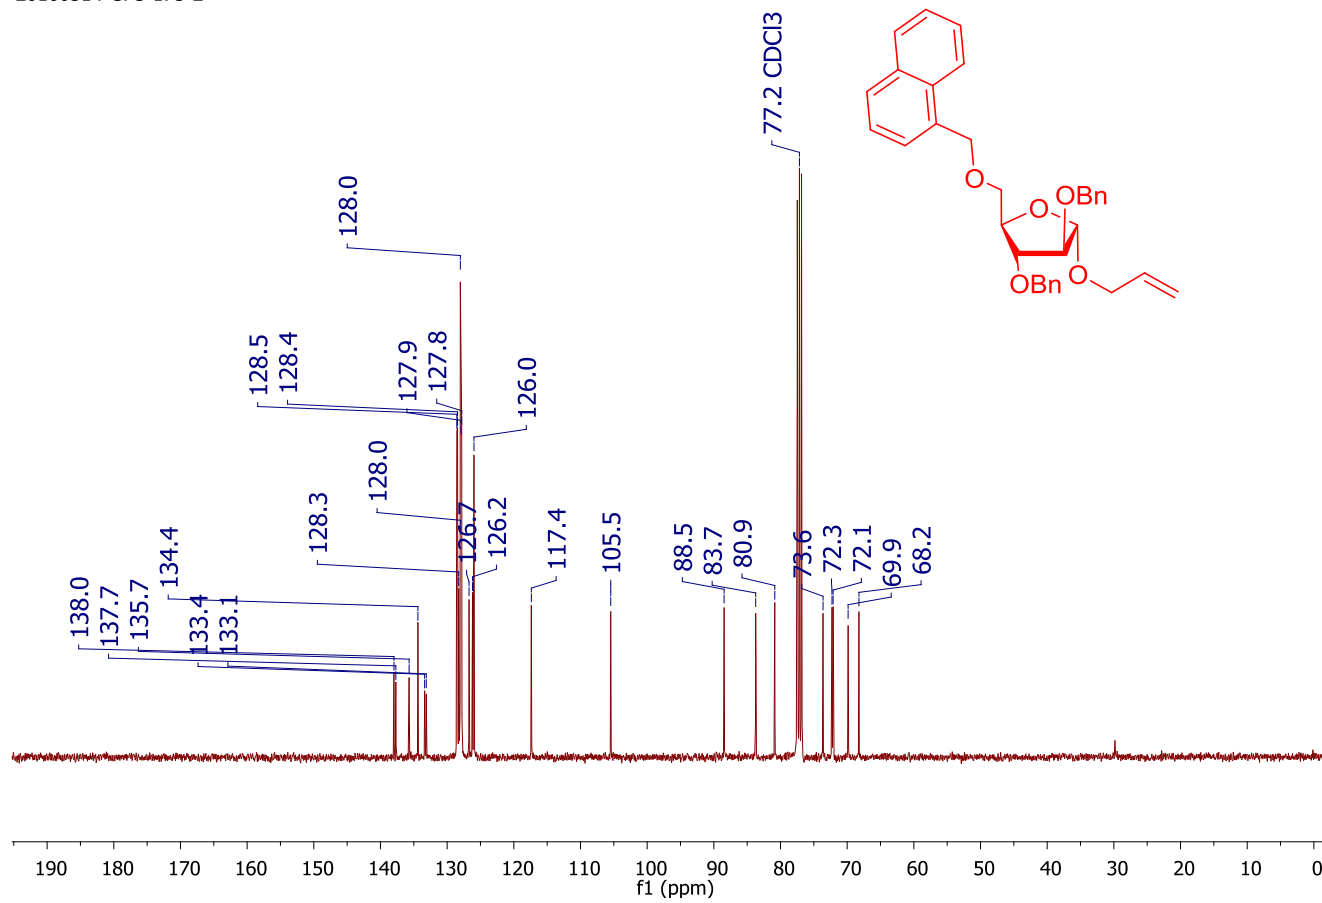



DEPT Spectrum (100.53 MHz, CDCl<sub>3</sub>) of Compound **22**

20160514-GPS-175-2

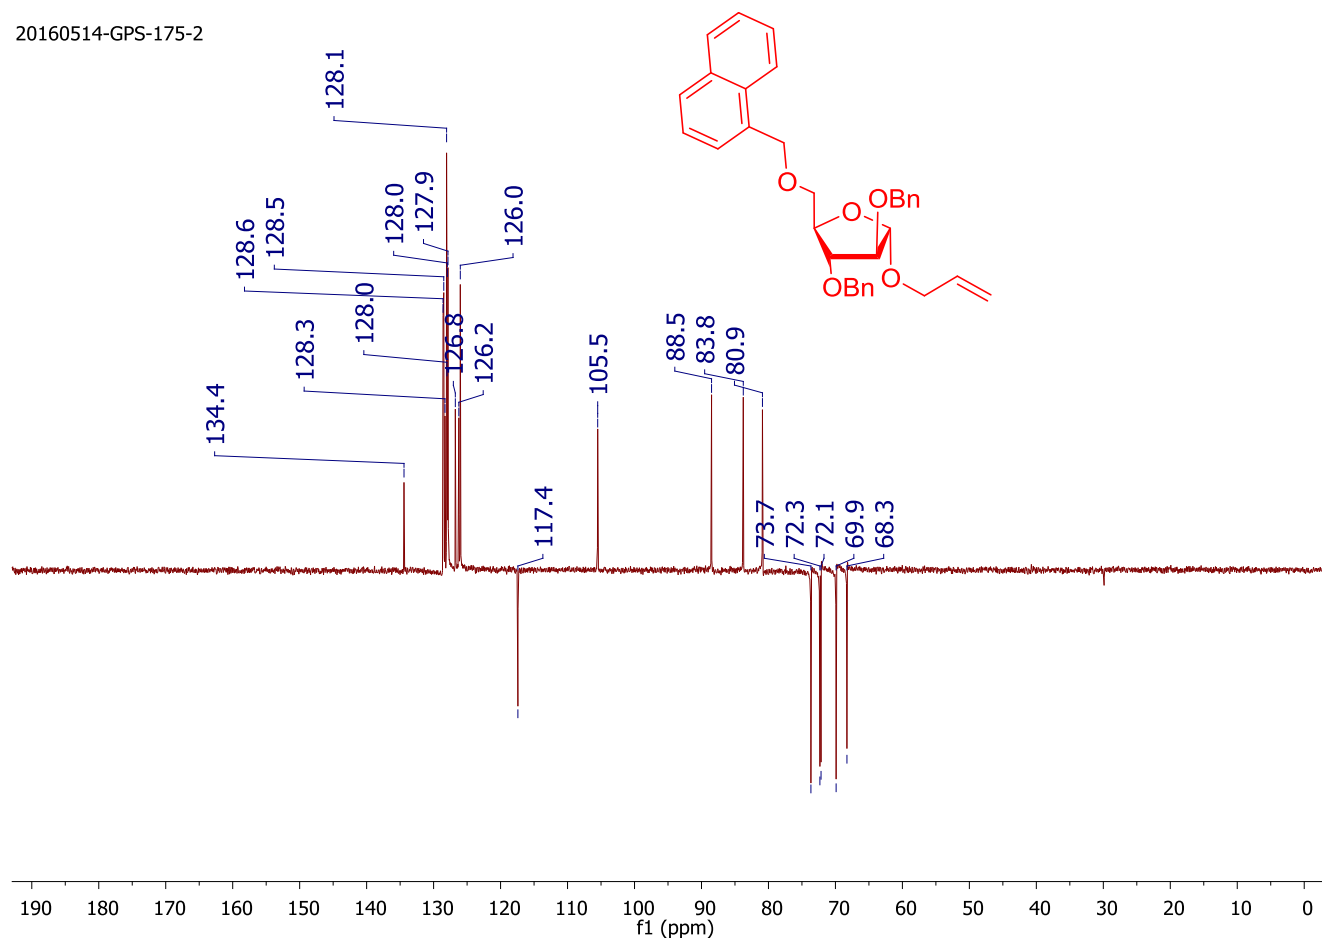

<sup>1</sup>H NMR Spectrum (399.78 MHz, CDCl<sub>3</sub>) of Compound **23**

20140412-MI-5-91.24.f16  
MI-5-91

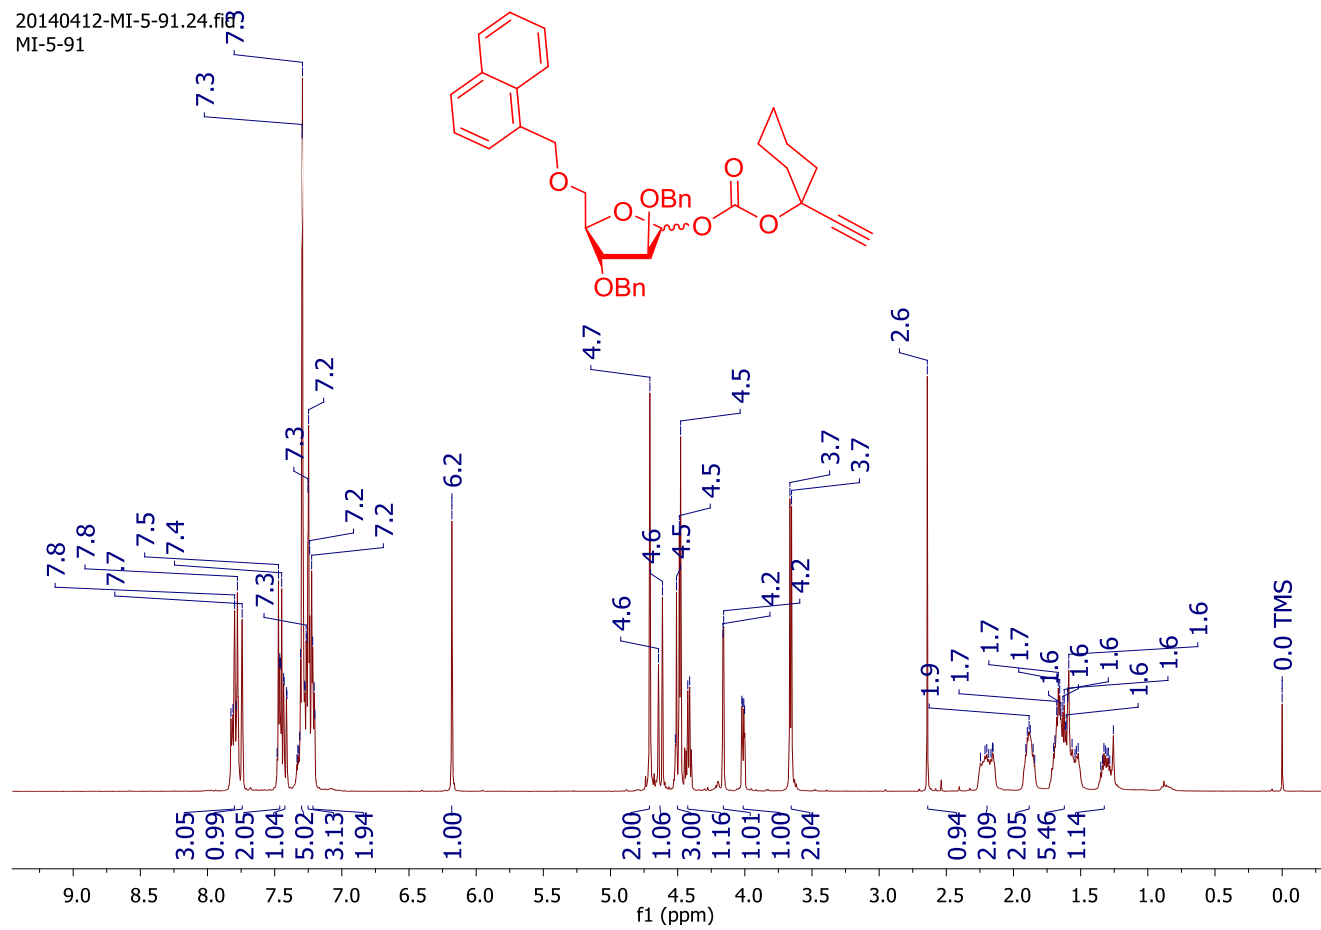

<sup>13</sup>C NMR Spectrum (100.53 MHz, CDCl<sub>3</sub>) of Compound **23**

20140412-MI-5-91.26.fid  
MI-5-91

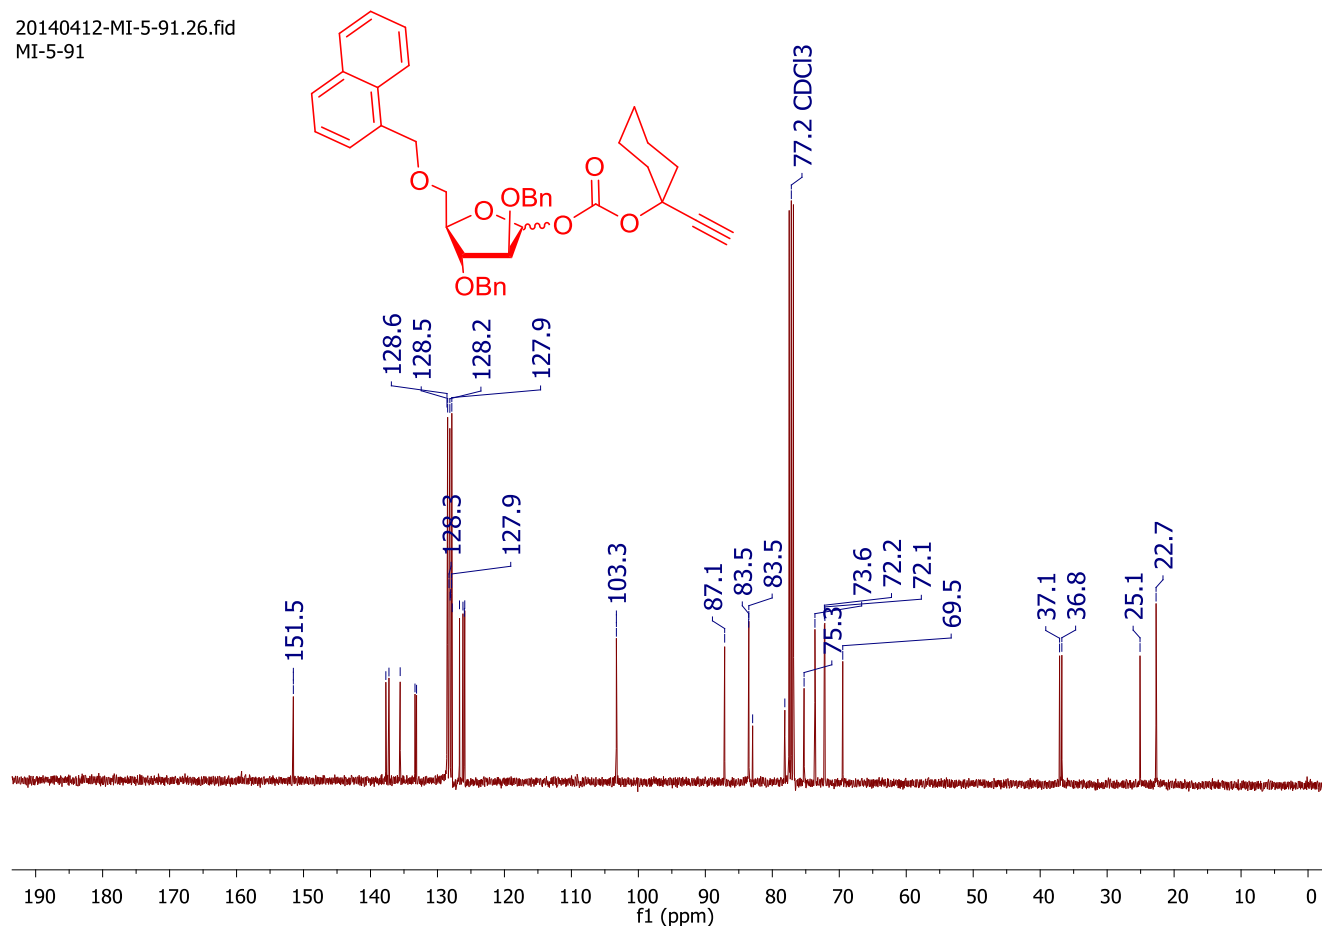

# DEPT Spectrum (100.53 MHz, CDCl<sub>3</sub>) of Compound **23**

20140412-MI-5-91.27.fid  
MI-5-91

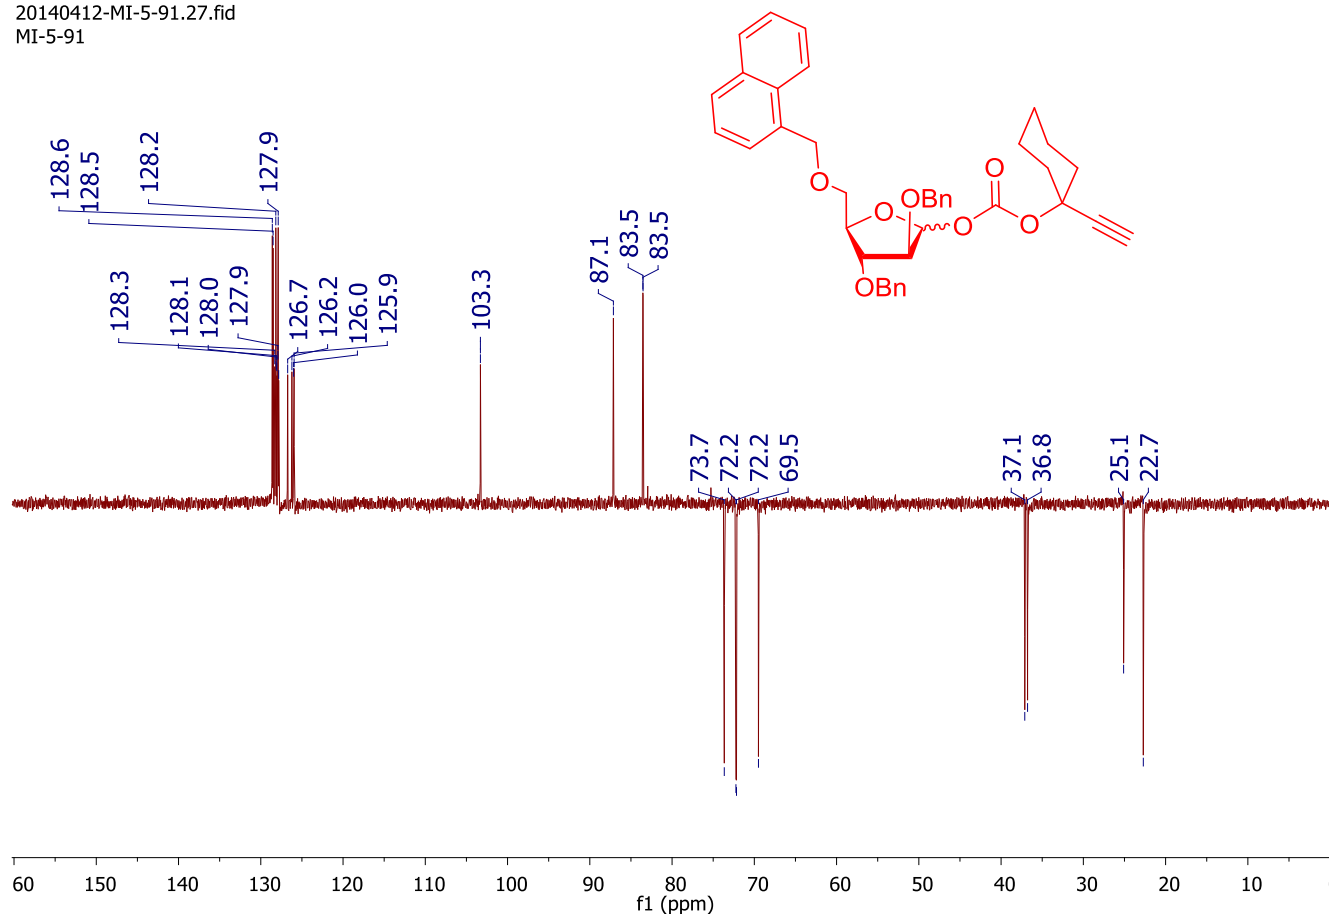

<sup>1</sup>H NMR Spectrum (399.78 MHz, CDCl<sub>3</sub>) of Compound **26**

20151217-MI-5-10C.21.fid  
MI-5-10C

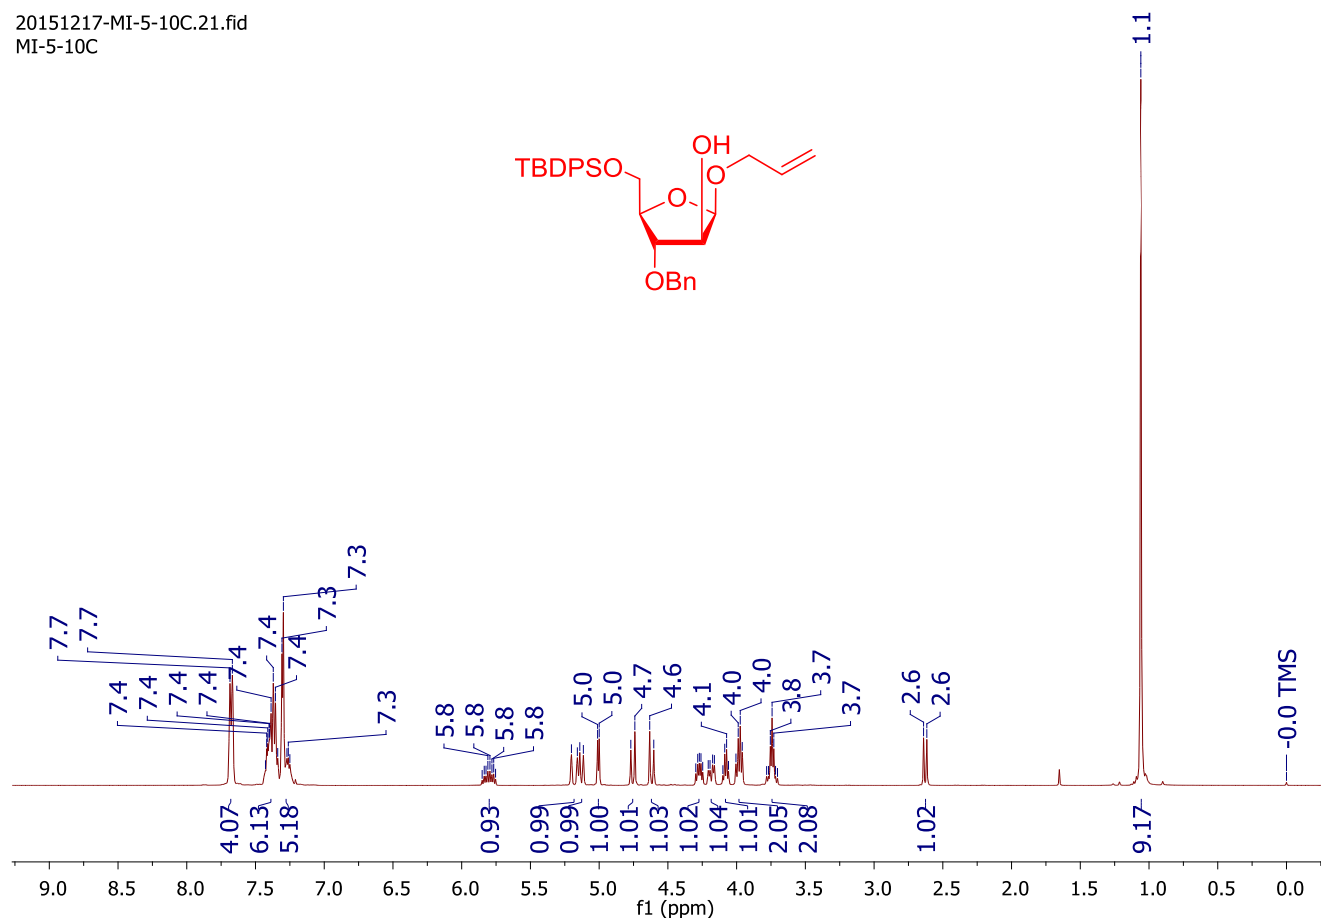

<sup>13</sup>C NMR Spectrum (100.53 MHz, CDCl<sub>3</sub>) of Compound **26**

20151217-MI-5-10C.23.fid  
MI-5-10C

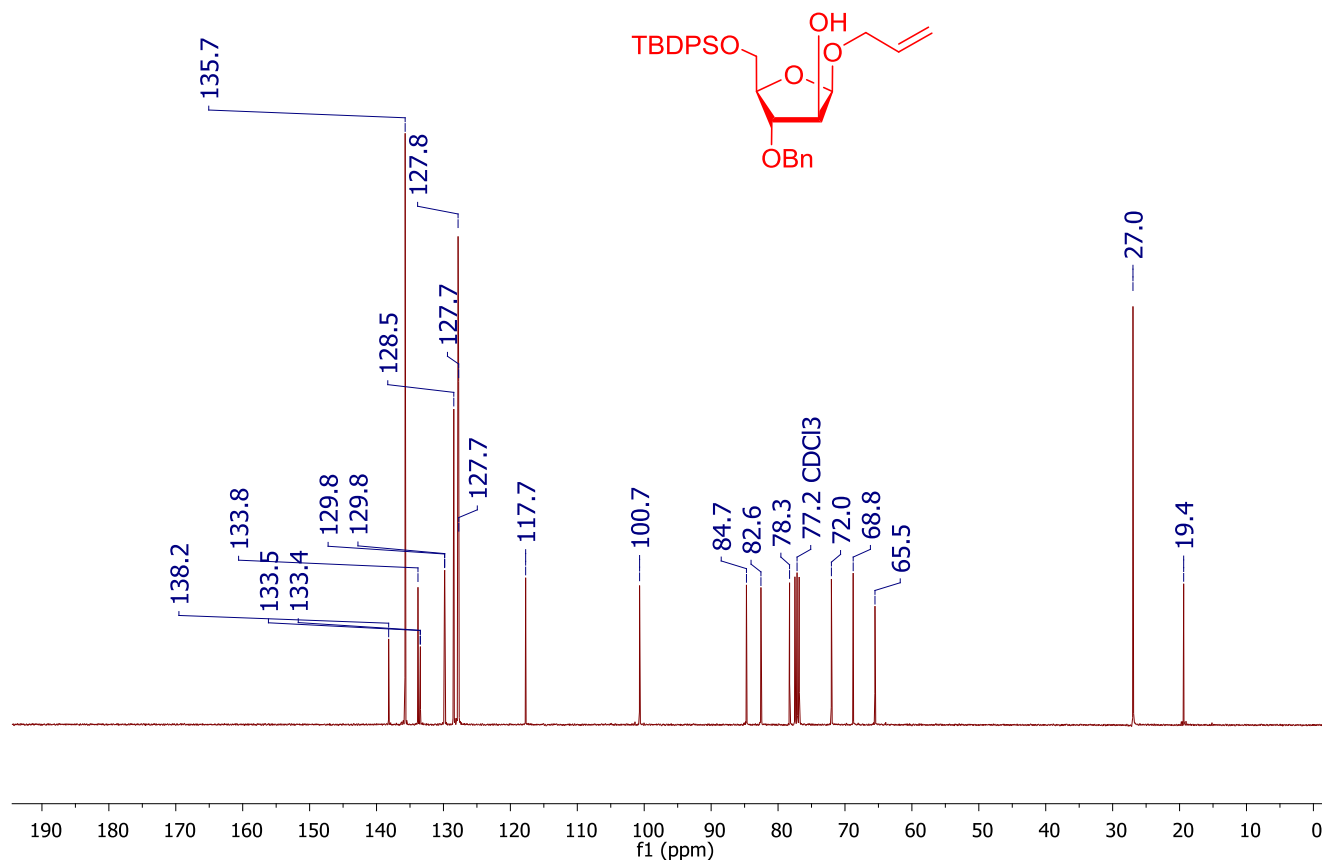

# DEPT Spectrum (100.53 MHz, CDCl<sub>3</sub>) of Compound **26**

20151217-MI-5-10C.24.fid  
MI-5-10C

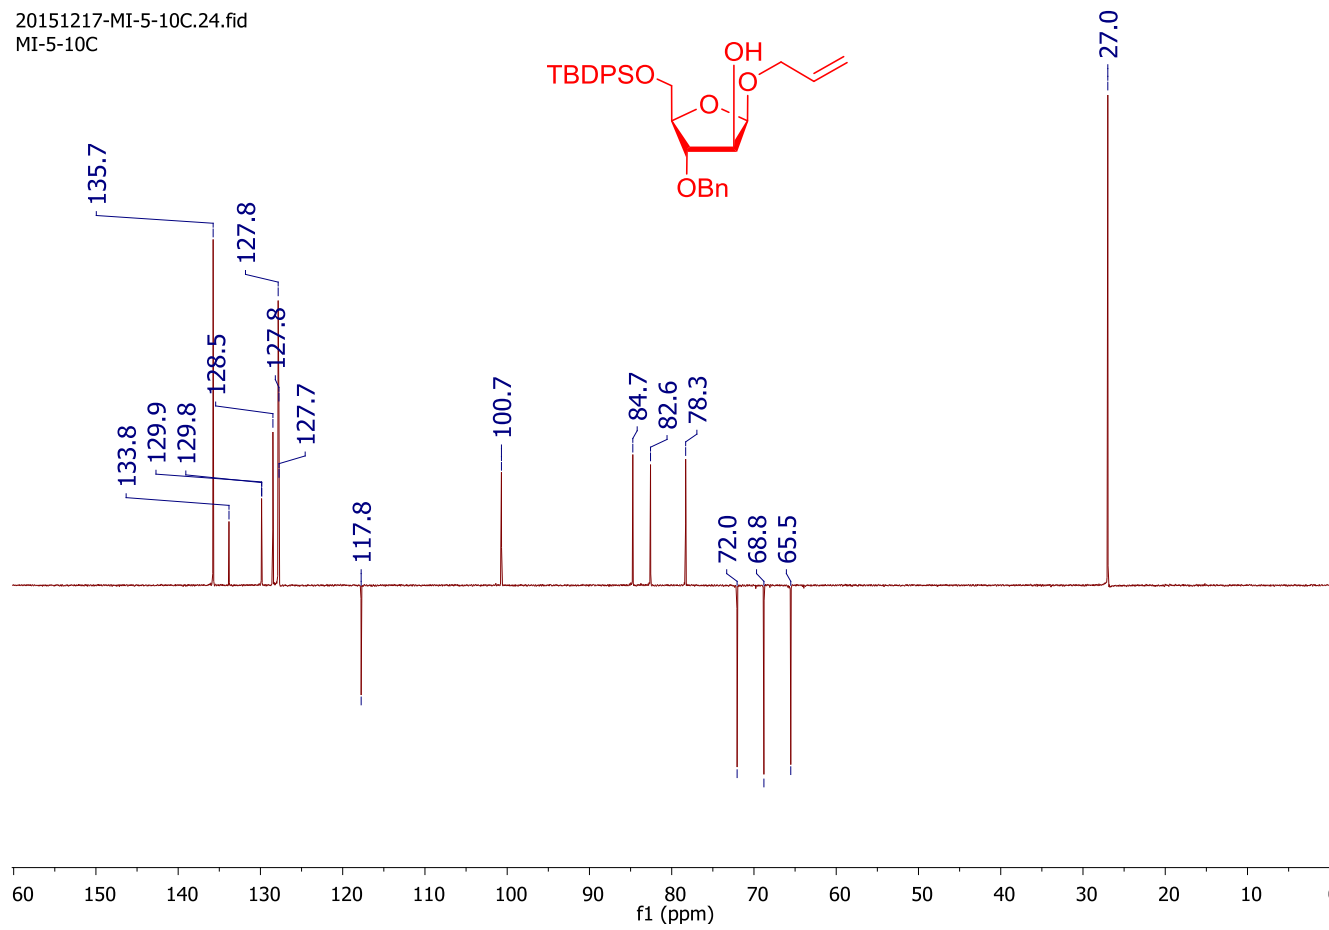

<sup>1</sup>H NMR Spectrum (399.78 MHz, CDCl<sub>3</sub>) of Compound **27**

20151126-MI-5-2.40.fid  
MI-5-2

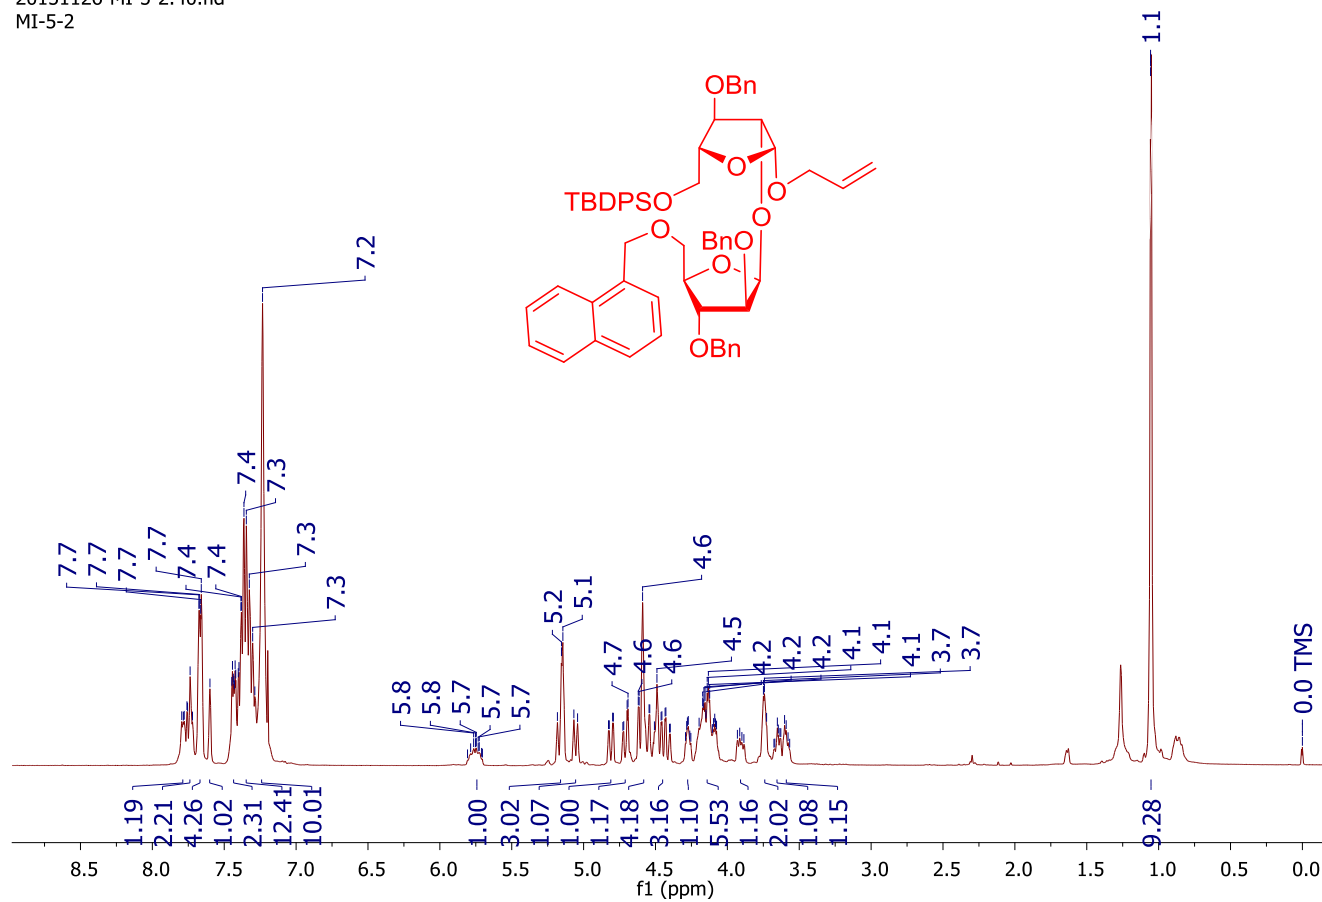



<sup>13</sup>C NMR Spectrum (100.53 MHz, CDCl<sub>3</sub>) of Compound **27**

20151126-MI-5-2.42.fid  
MI-5-2

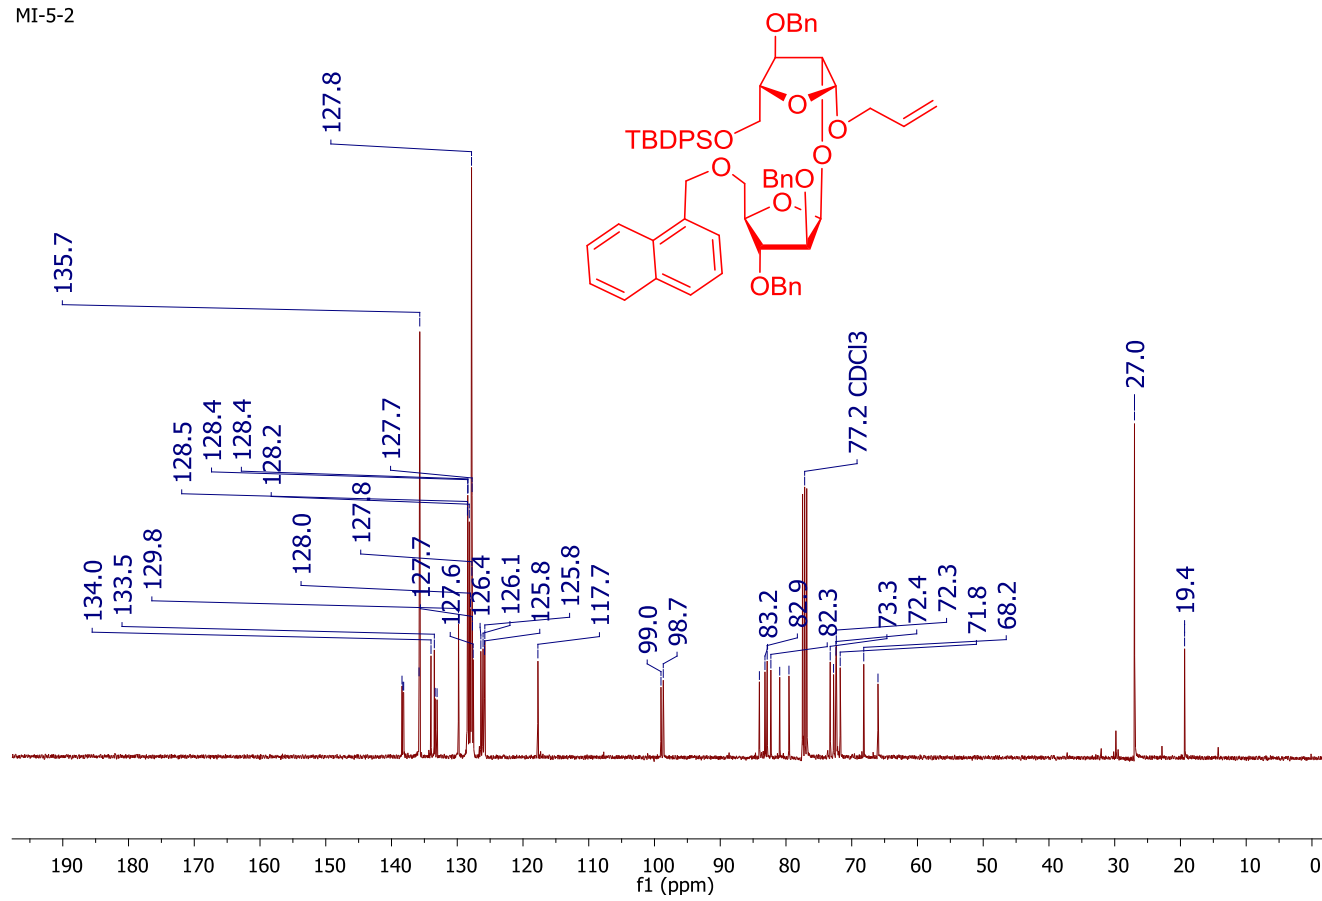

DEPT Spectrum (100.53 MHz, CDCl<sub>3</sub>) of Compound **27**

20151126-MI-5-2.43.fid  
MI-5-2

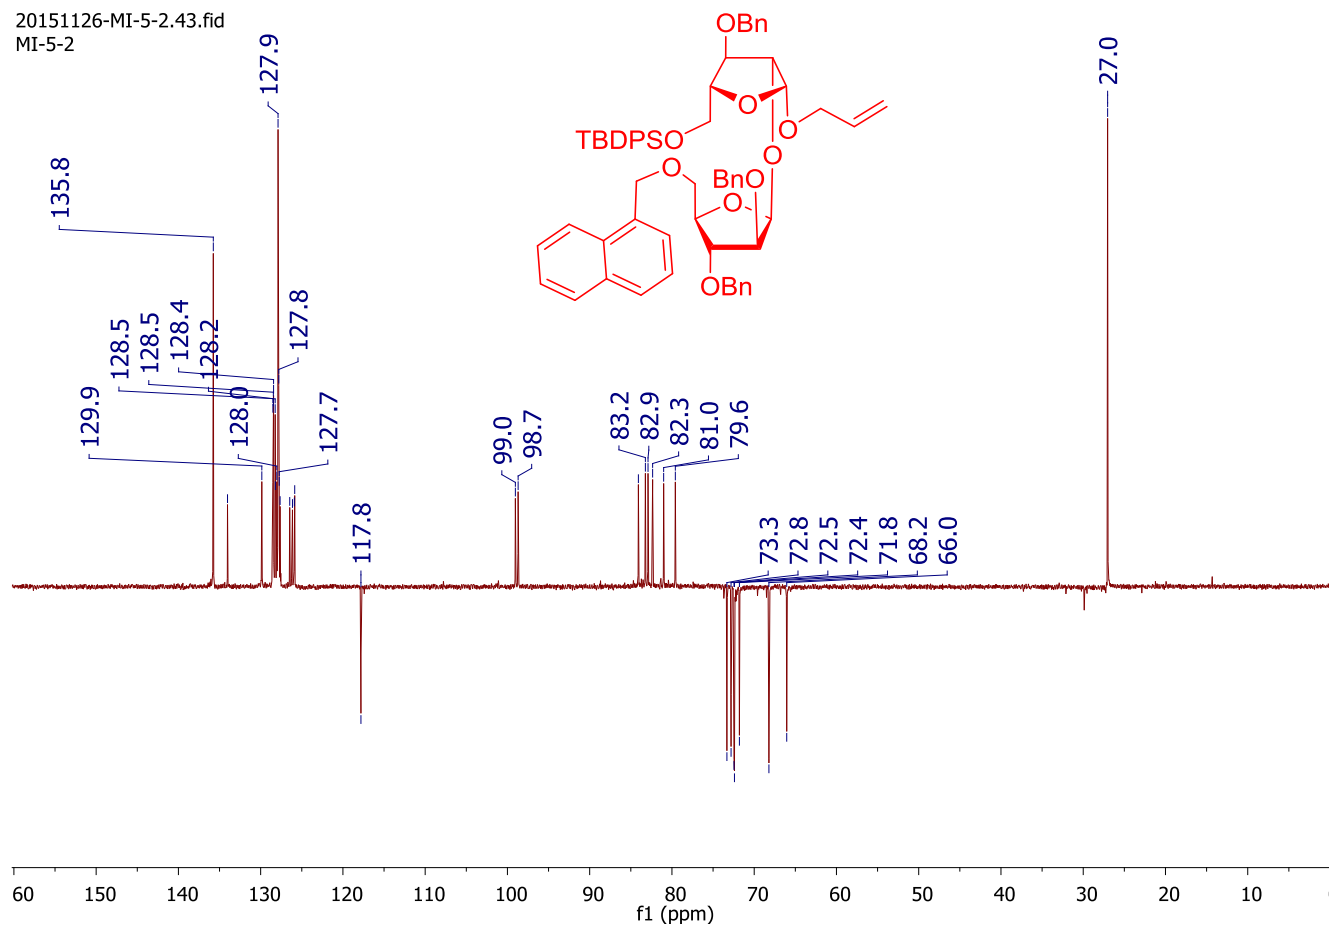

<sup>1</sup>H NMR Spectrum (399.78 MHz, CDCl<sub>3</sub>) of Compound **3**

20160412-MI-5-91A

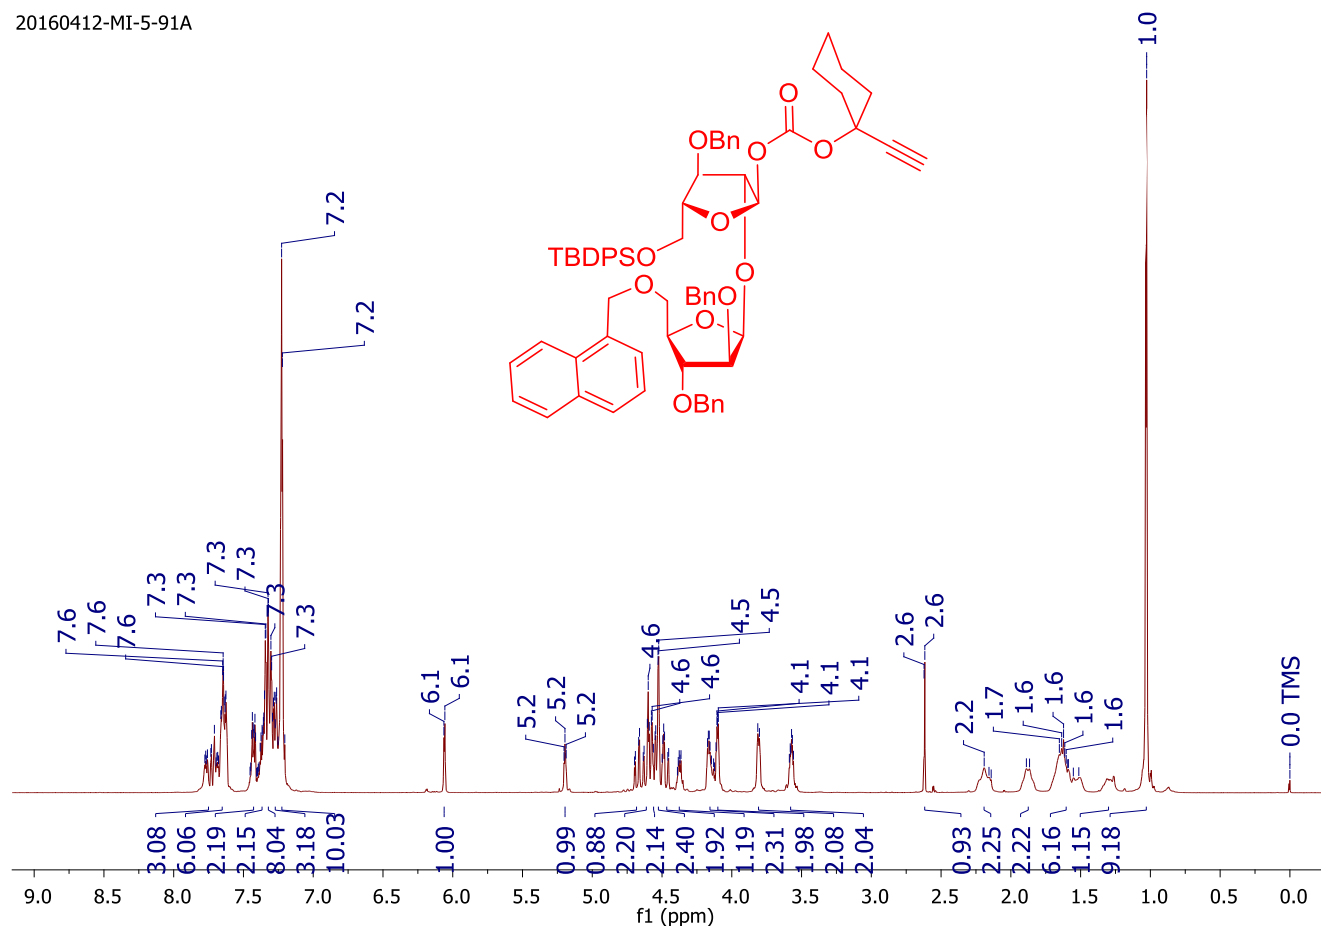

$^{13}\text{C}$  NMR Spectrum (100.53 MHz,  $\text{CDCl}_3$ ) of Compound **3**

20160412-MI-5-91A

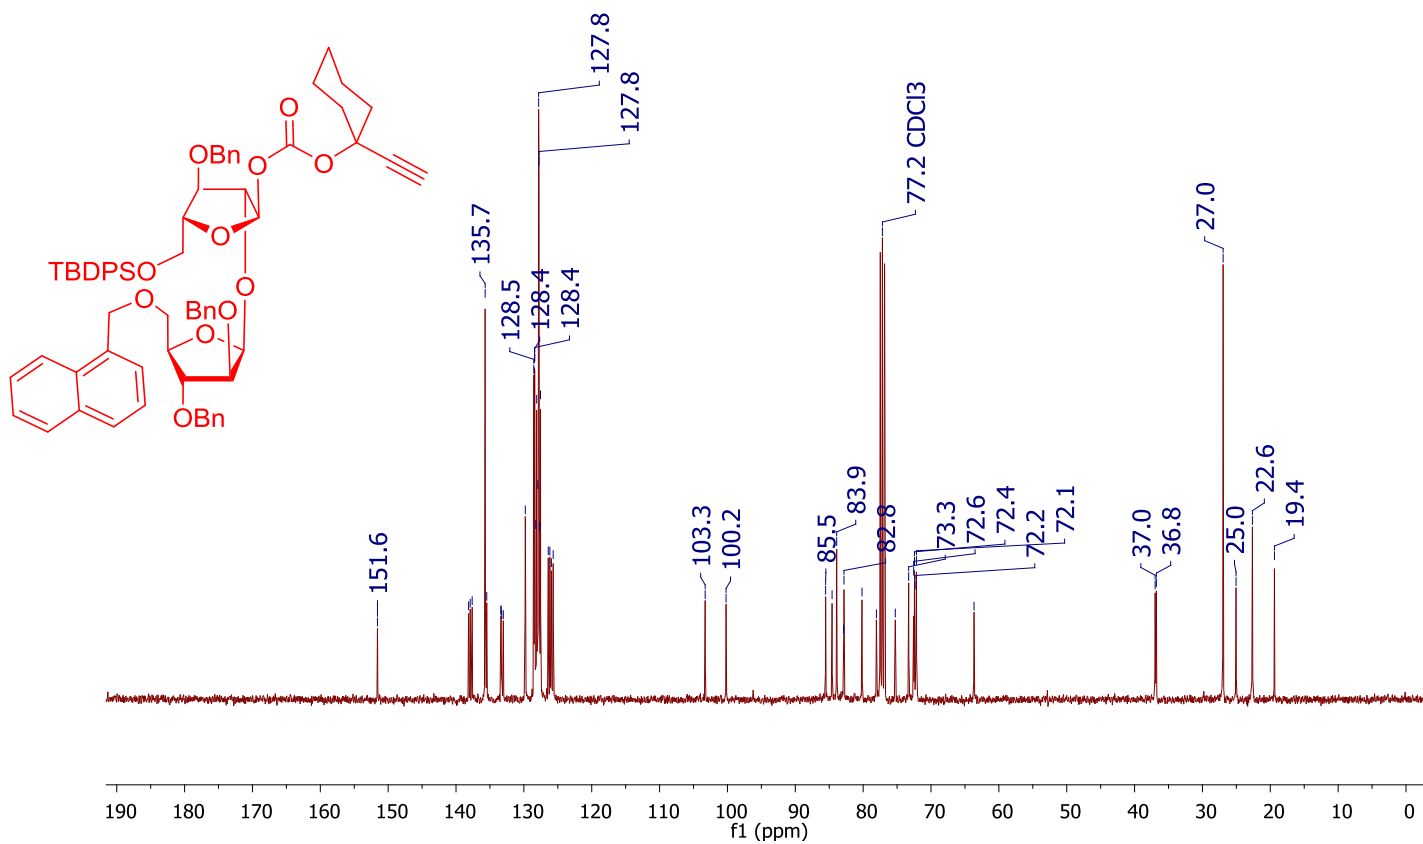

DEPT Spectrum (100.53 MHz, CDCl<sub>3</sub>) of Compound 3

20160412-MI-5-91A

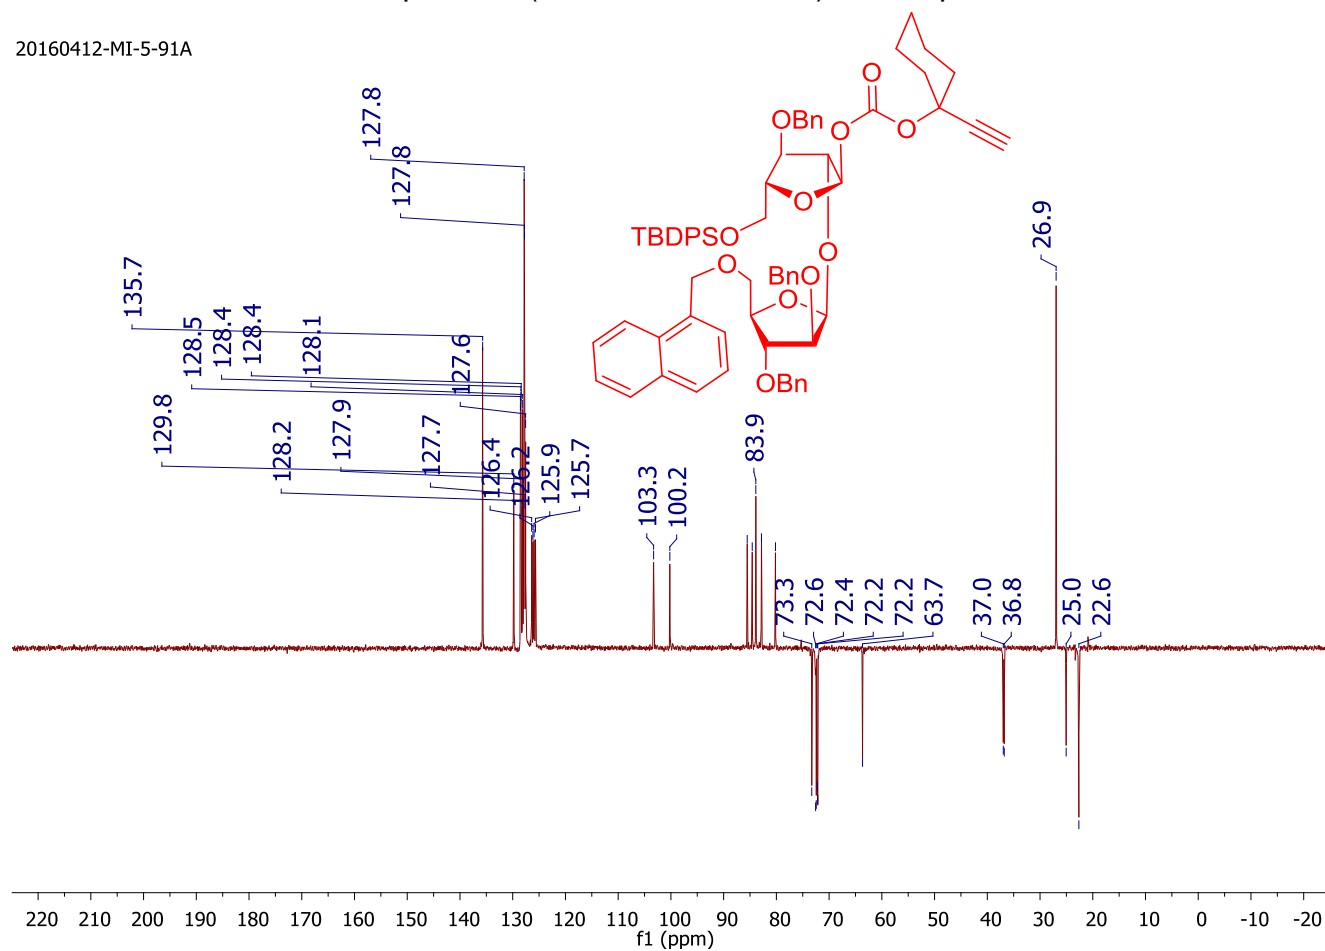

# <sup>1</sup>H NMR Spectrum (399.78 MHz, CDCl<sub>3</sub>) of Compound 4

20160425-MI-5-57.37.fid  
MI-5-57

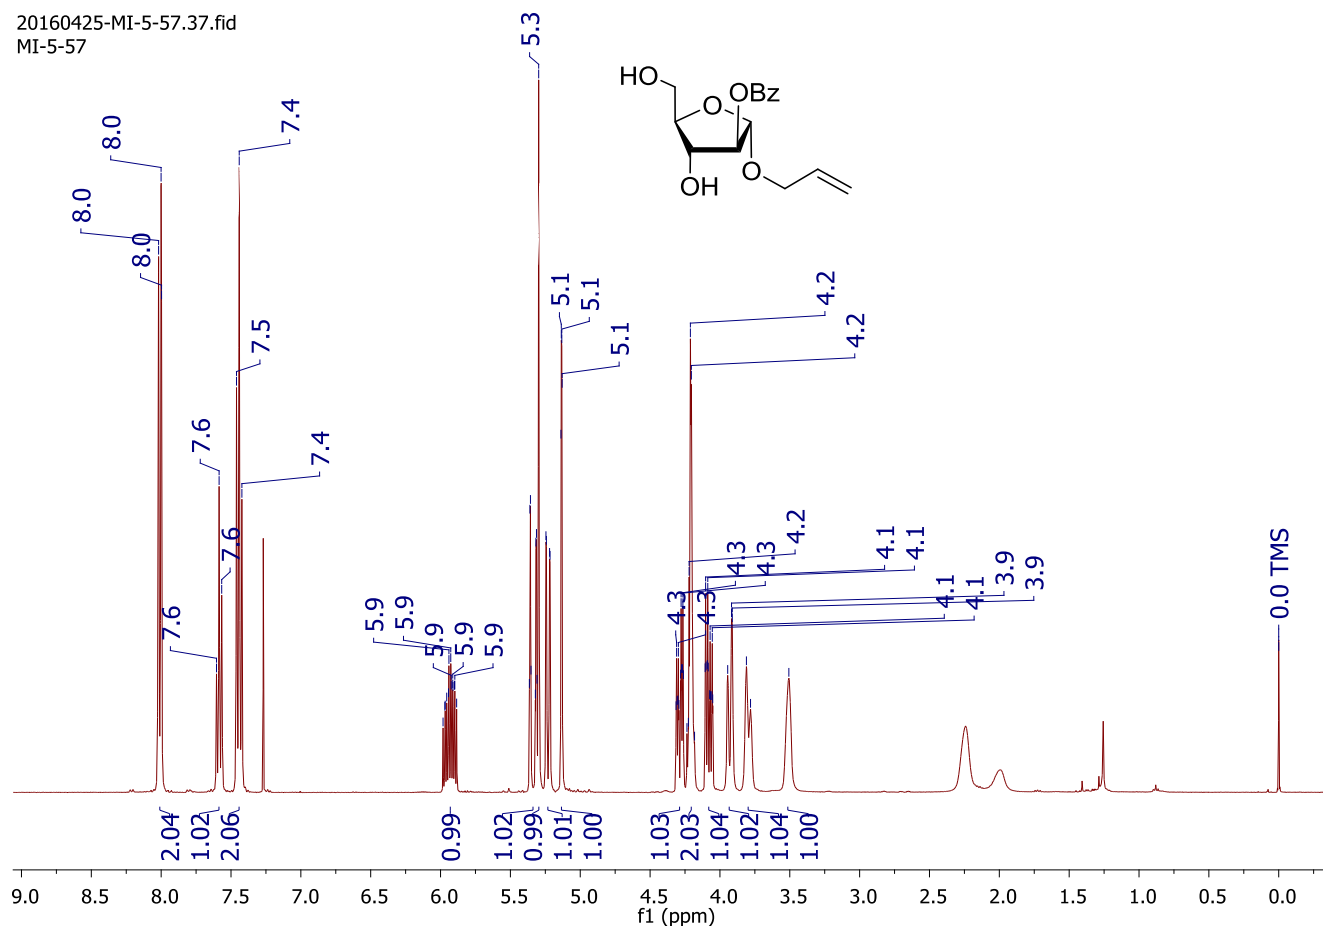

<sup>13</sup>C NMR Spectrum (100.53 MHz, CDCl<sub>3</sub>) of Compound 4

20160425-MI-5-57.39.fid  
MI-5-57

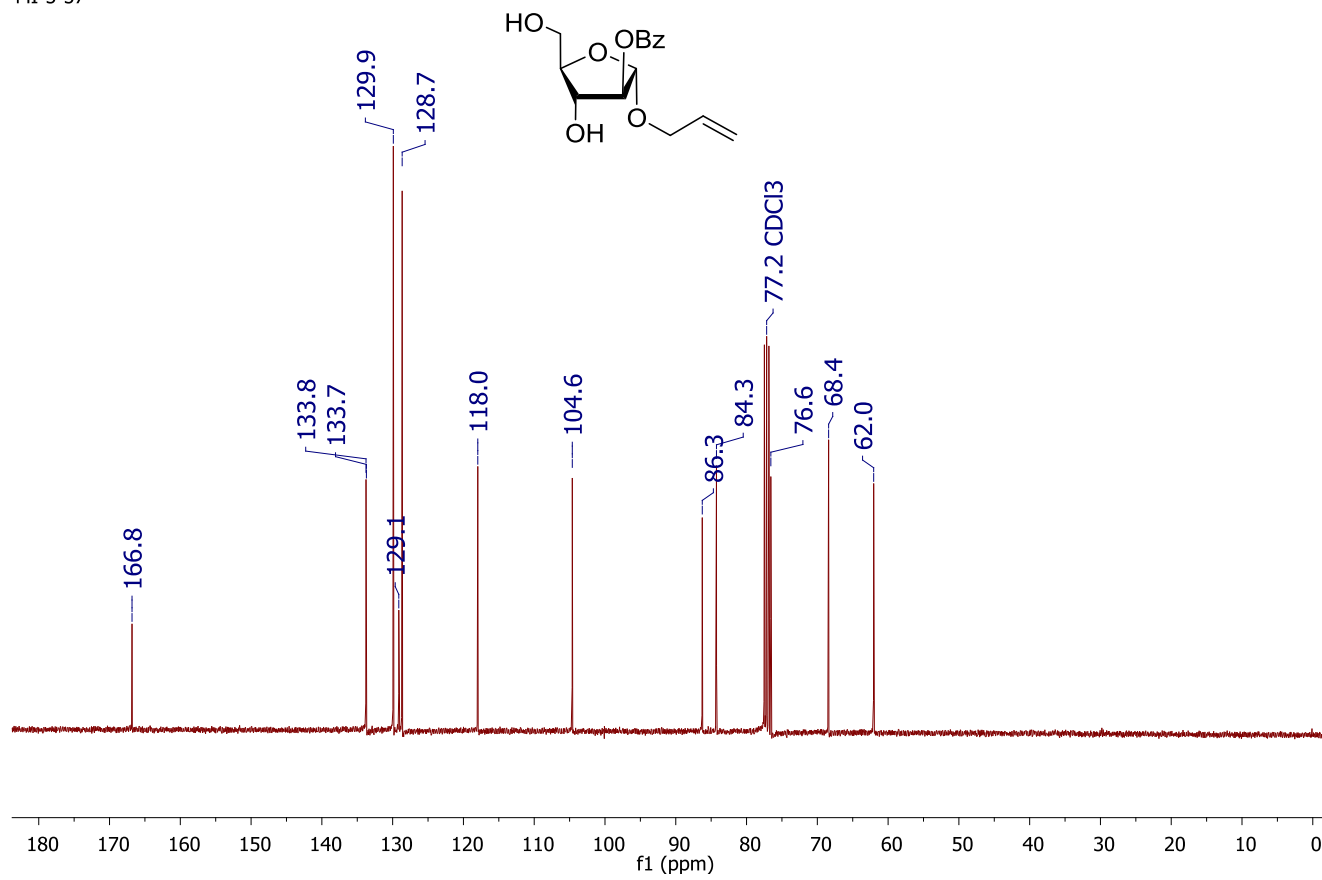

# DEPT Spectrum (100.53 MHz, CDCl<sub>3</sub>) of Compound 4

20160425-MI-5-57.40.fid  
MI-5-57

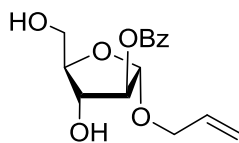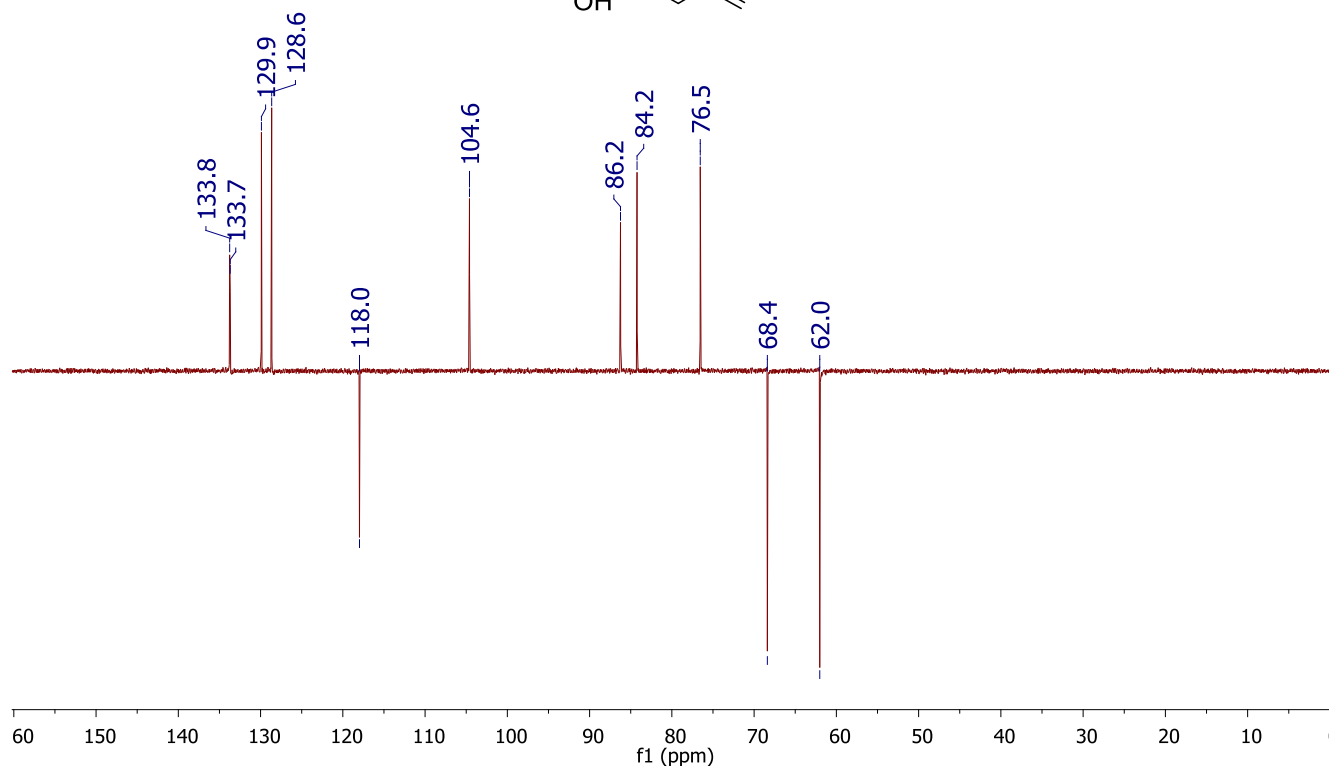



<sup>1</sup>H NMR Spectrum (399.78 MHz, CDCl<sub>3</sub>) of Compound **31**

20160330-MI-5-82/2  
MI-5-82

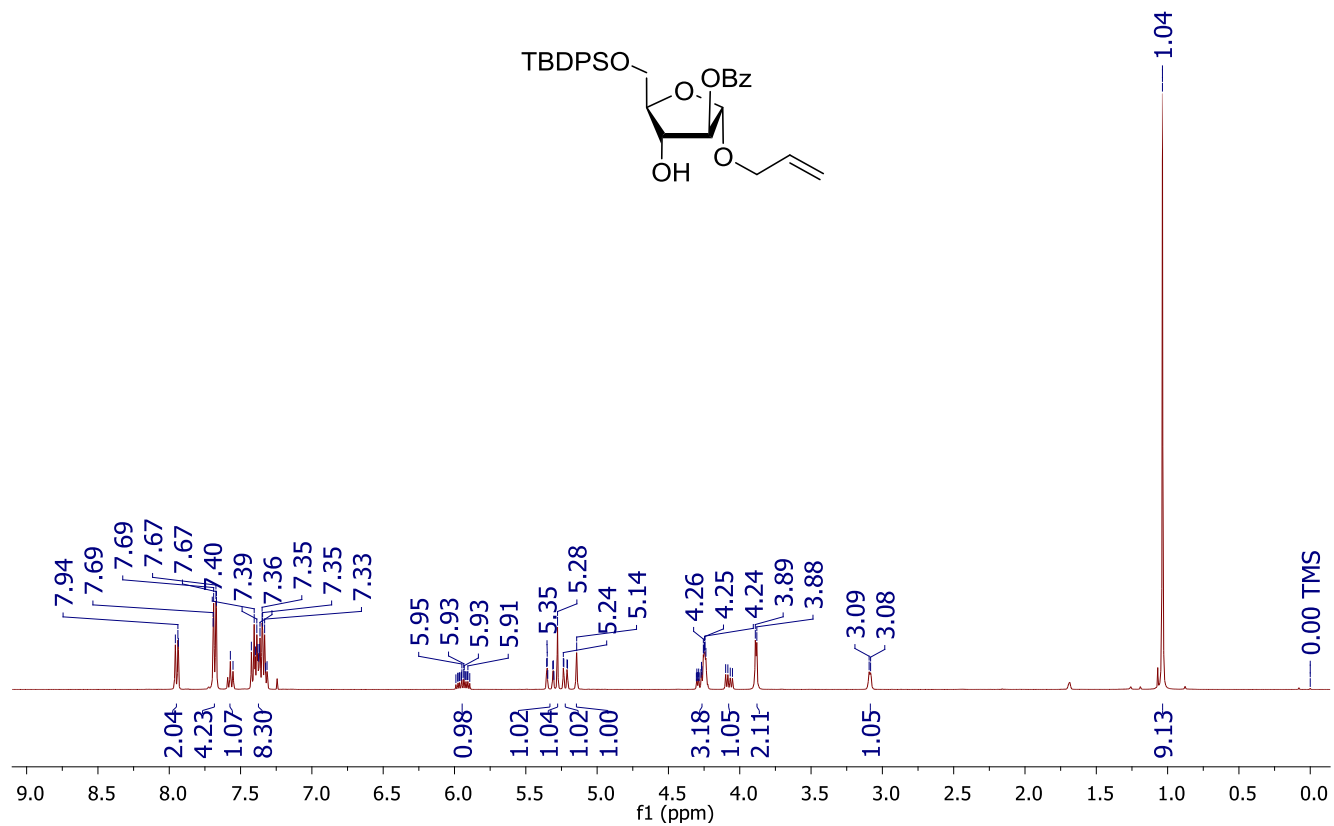

<sup>13</sup>C NMR Spectrum (100.53 MHz, CDCl<sub>3</sub>) of Compound **31**

20160330-MI-5-82/3  
MI-5-82

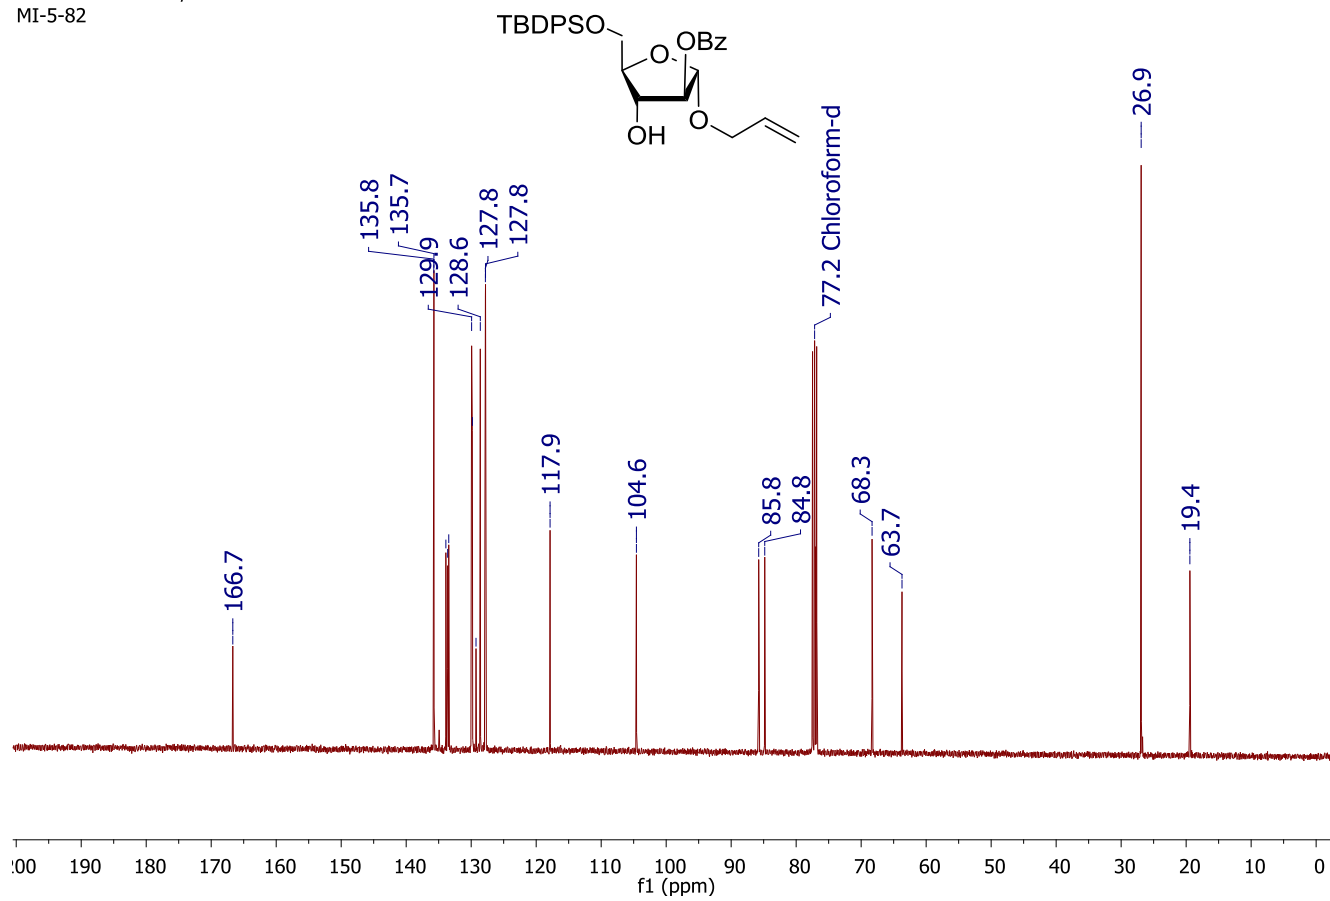

# DEPT Spectrum (100.53 MHz, CDCl<sub>3</sub>) of Compound **31**

20160330-MI-5-82/4  
MI-5-82

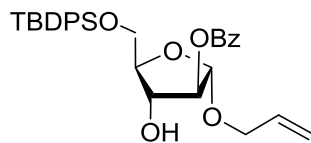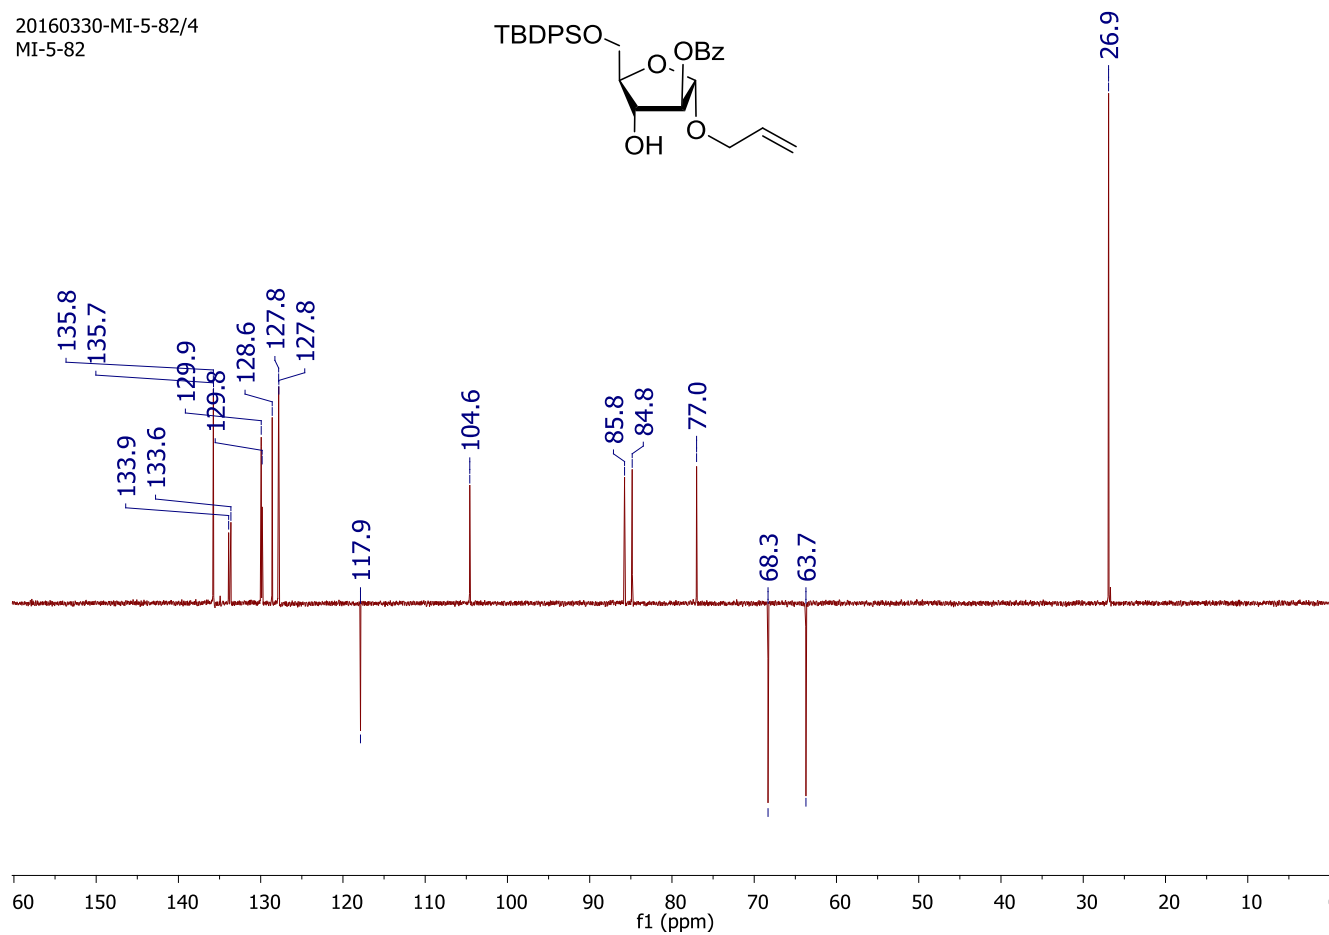

<sup>1</sup>H NMR Spectrum (399.78 MHz, CDCl<sub>3</sub>) of Compound **32**

20160330-MI-5-83/5  
MI-5-83

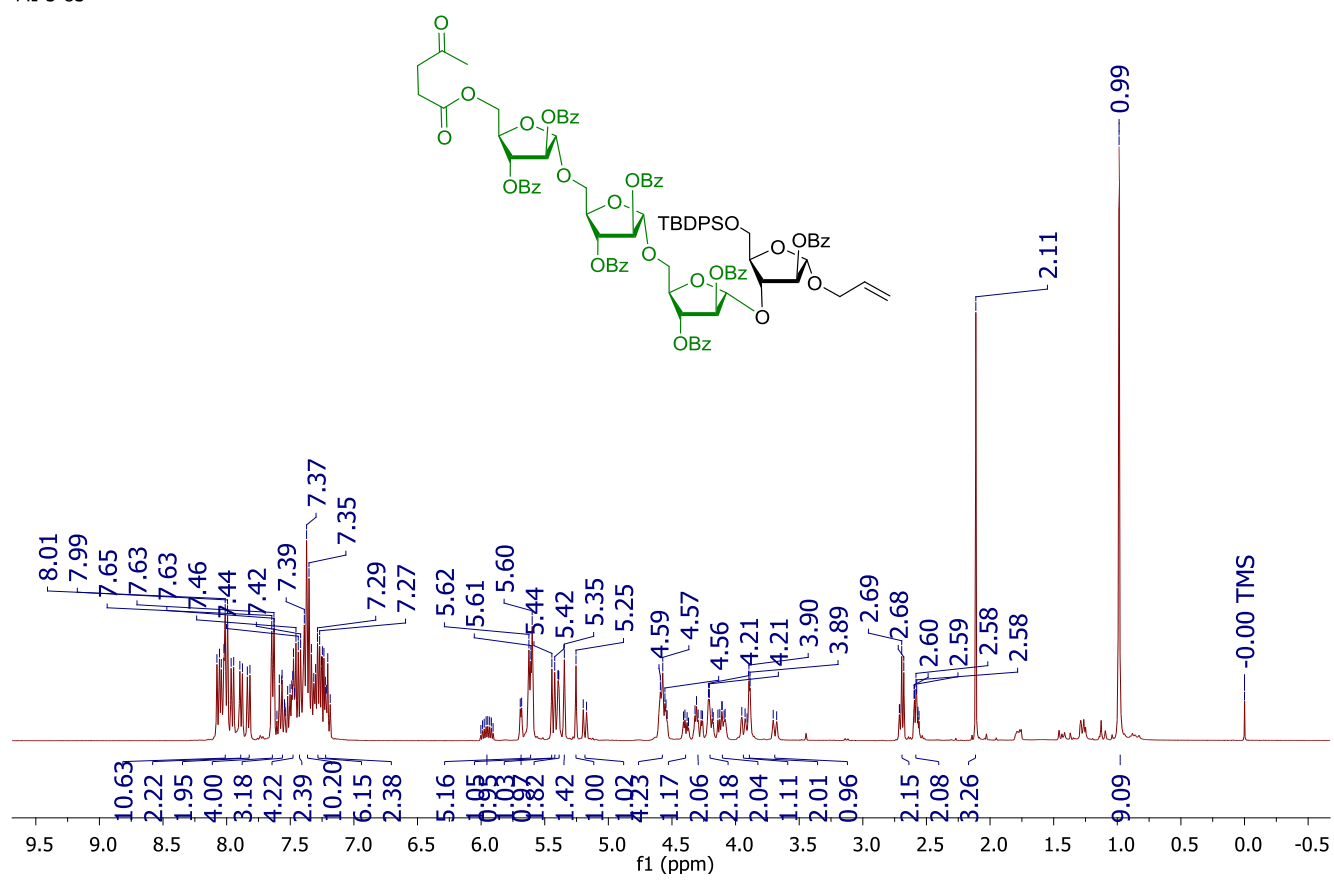

<sup>13</sup>C NMR Spectrum (100.53 MHz, CDCl<sub>3</sub>) of Compound 32

20160330-MI-5-83/7  
MI-5-83

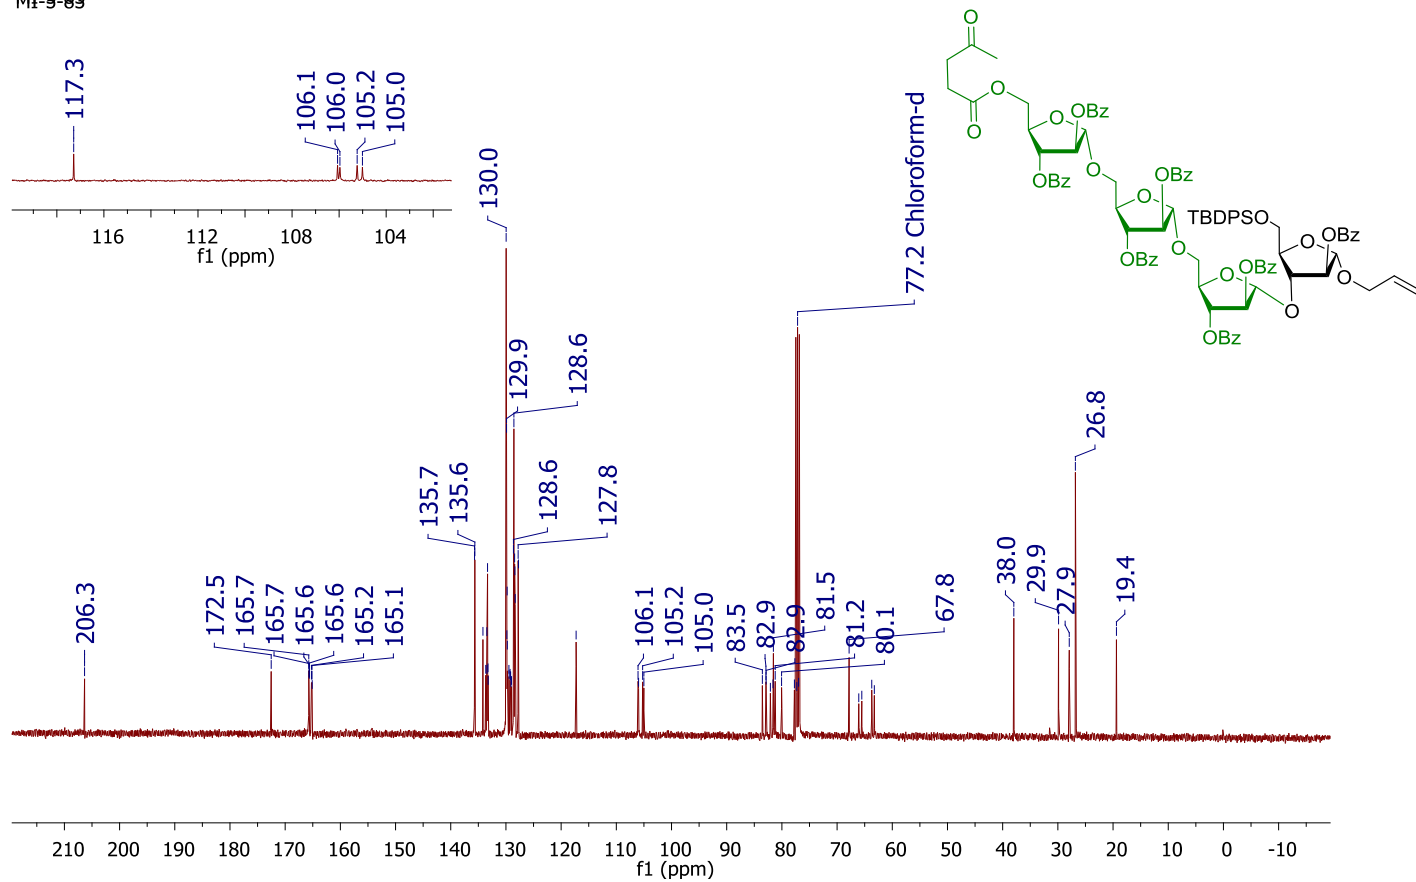

DEPT Spectrum (100.53 MHz, CDCl<sub>3</sub>) of Compound 32

20160330-MI-5-83/8  
MI-5-83

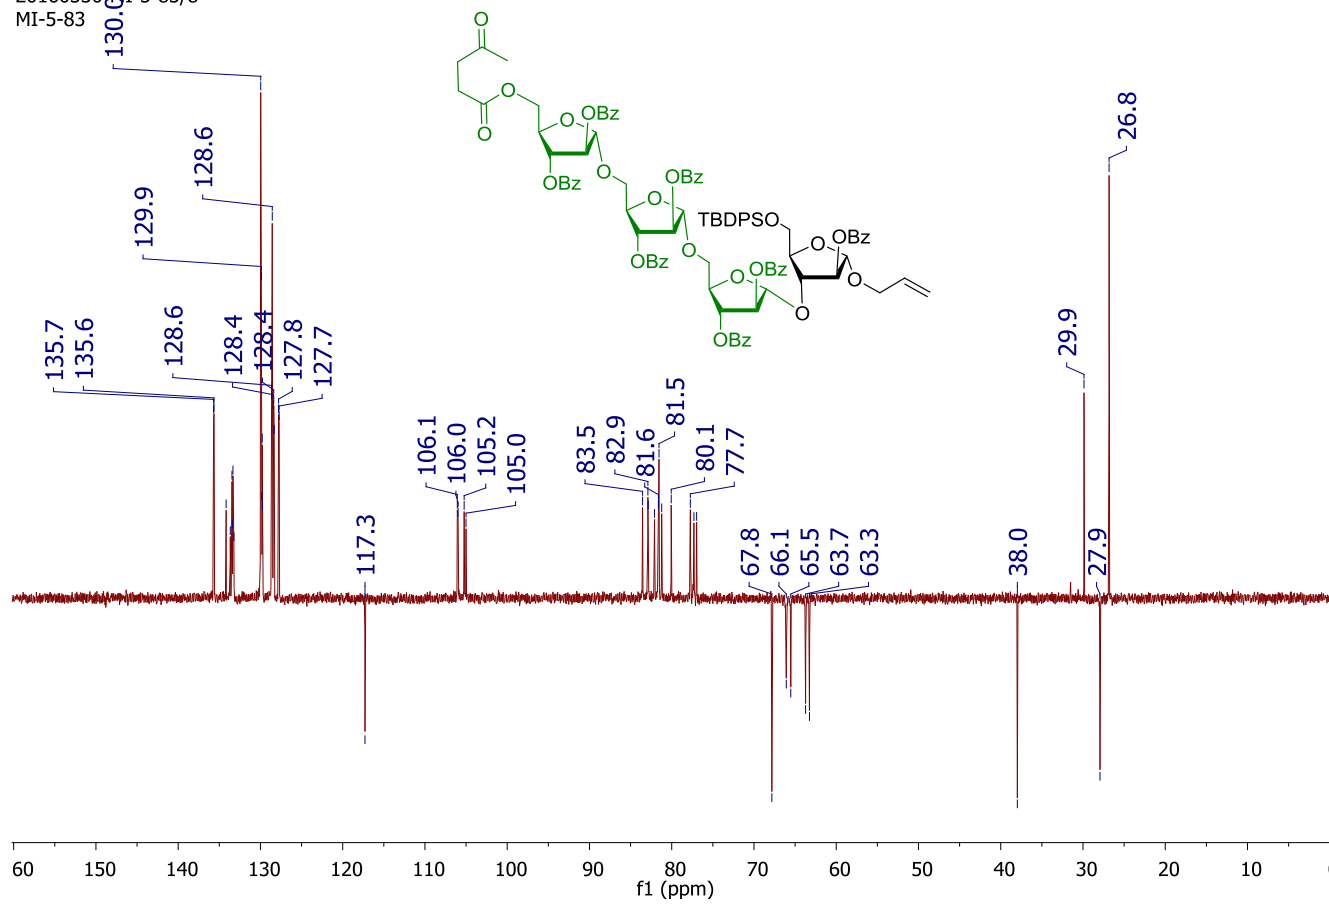

<sup>1</sup>H NMR Spectrum (399.78 MHz, CDCl<sub>3</sub>) of Compound **33**

20160401-MI-5-85

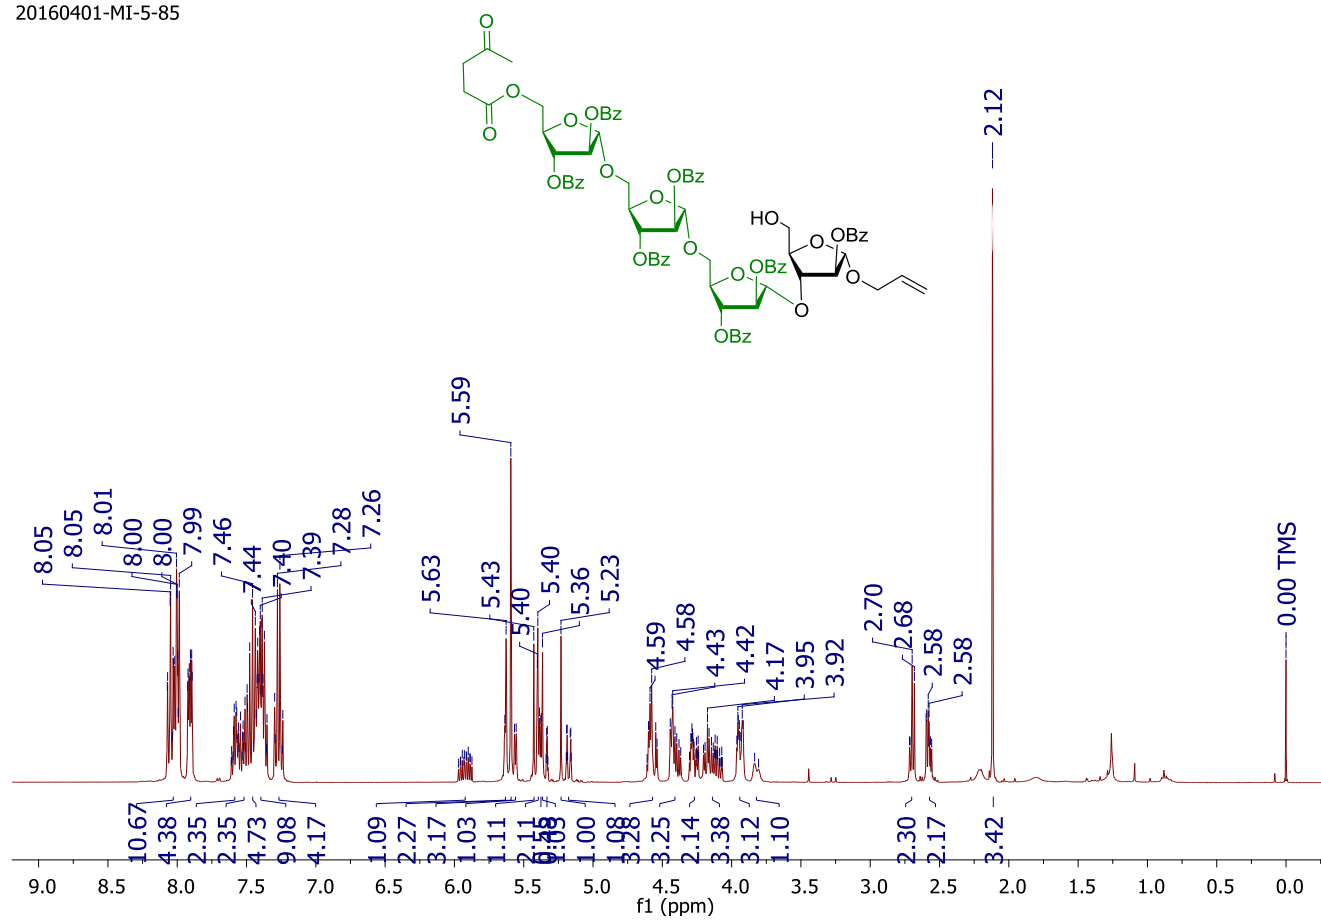

<sup>13</sup>C NMR Spectrum (100.53 MHz, CDCl<sub>3</sub>) of Compound **33**

20160401-MI-5-85

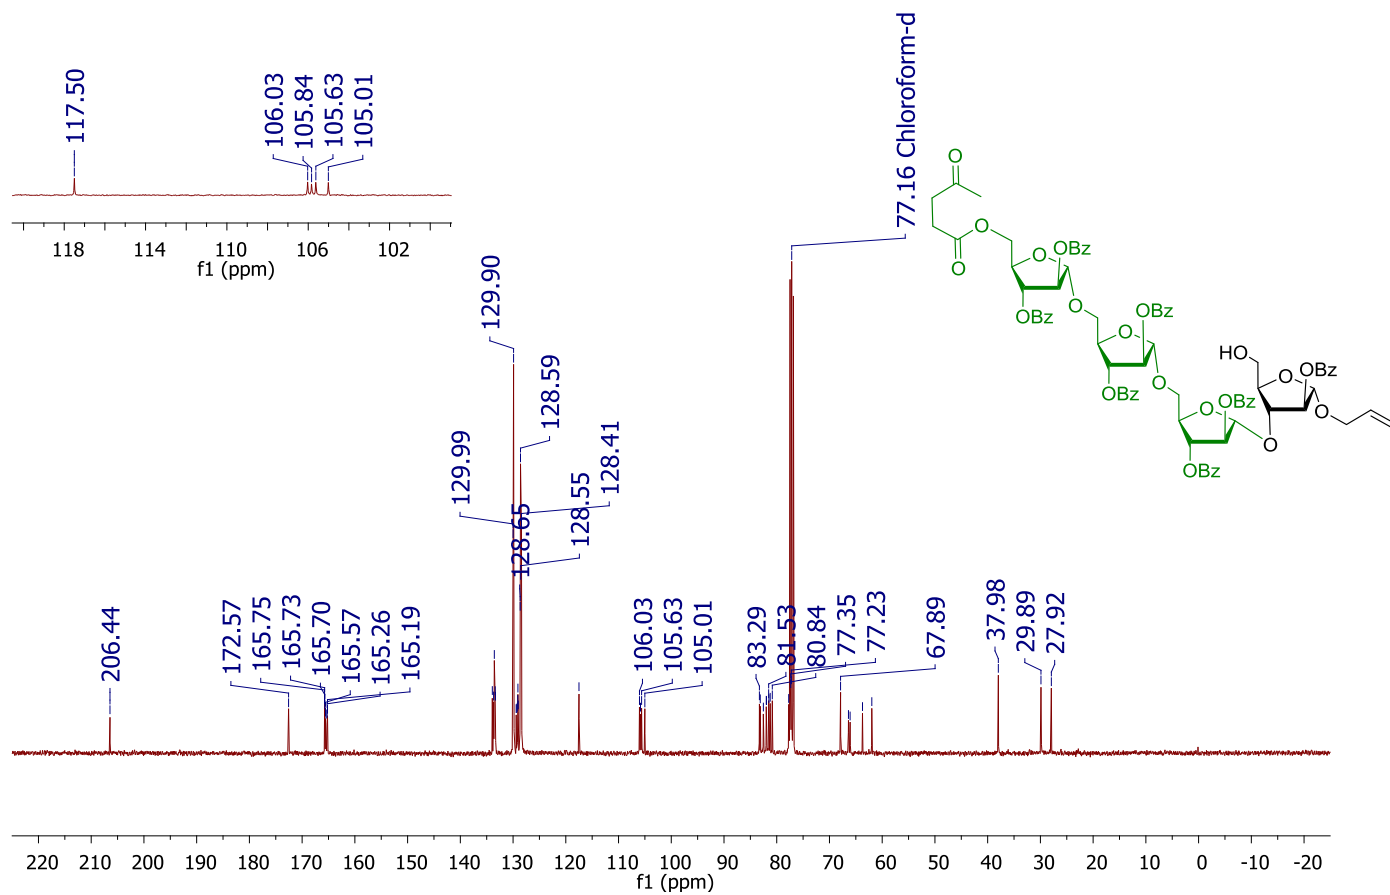



# DEPT Spectrum (100.53 MHz, CDCl<sub>3</sub>) of Compound **33**

20160401-MI-5-85

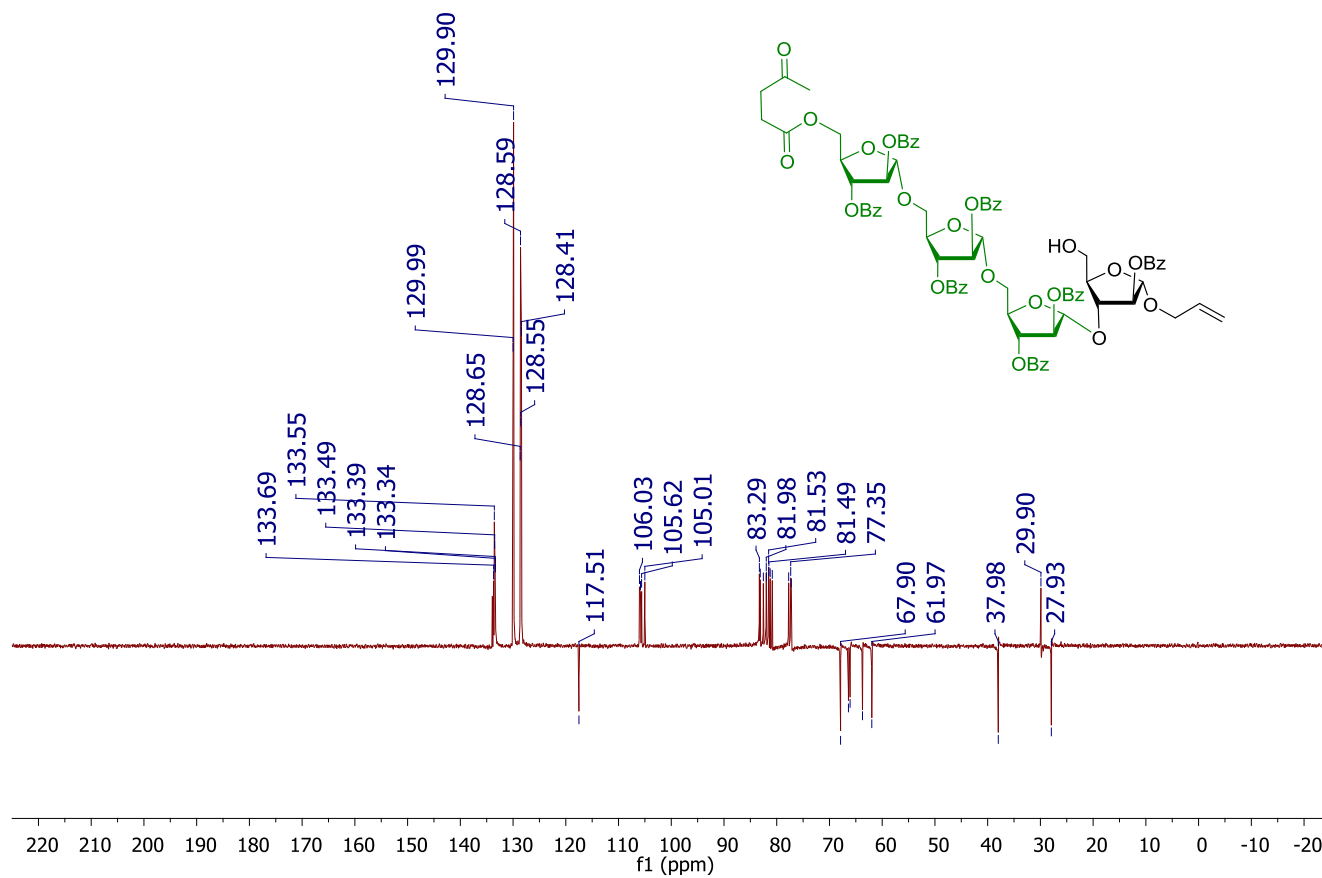

<sup>1</sup>H NMR Spectrum (399.78 MHz, CDCl<sub>3</sub>) of Compound **34**

20160404-MI-5-86/37  
MI-5-86

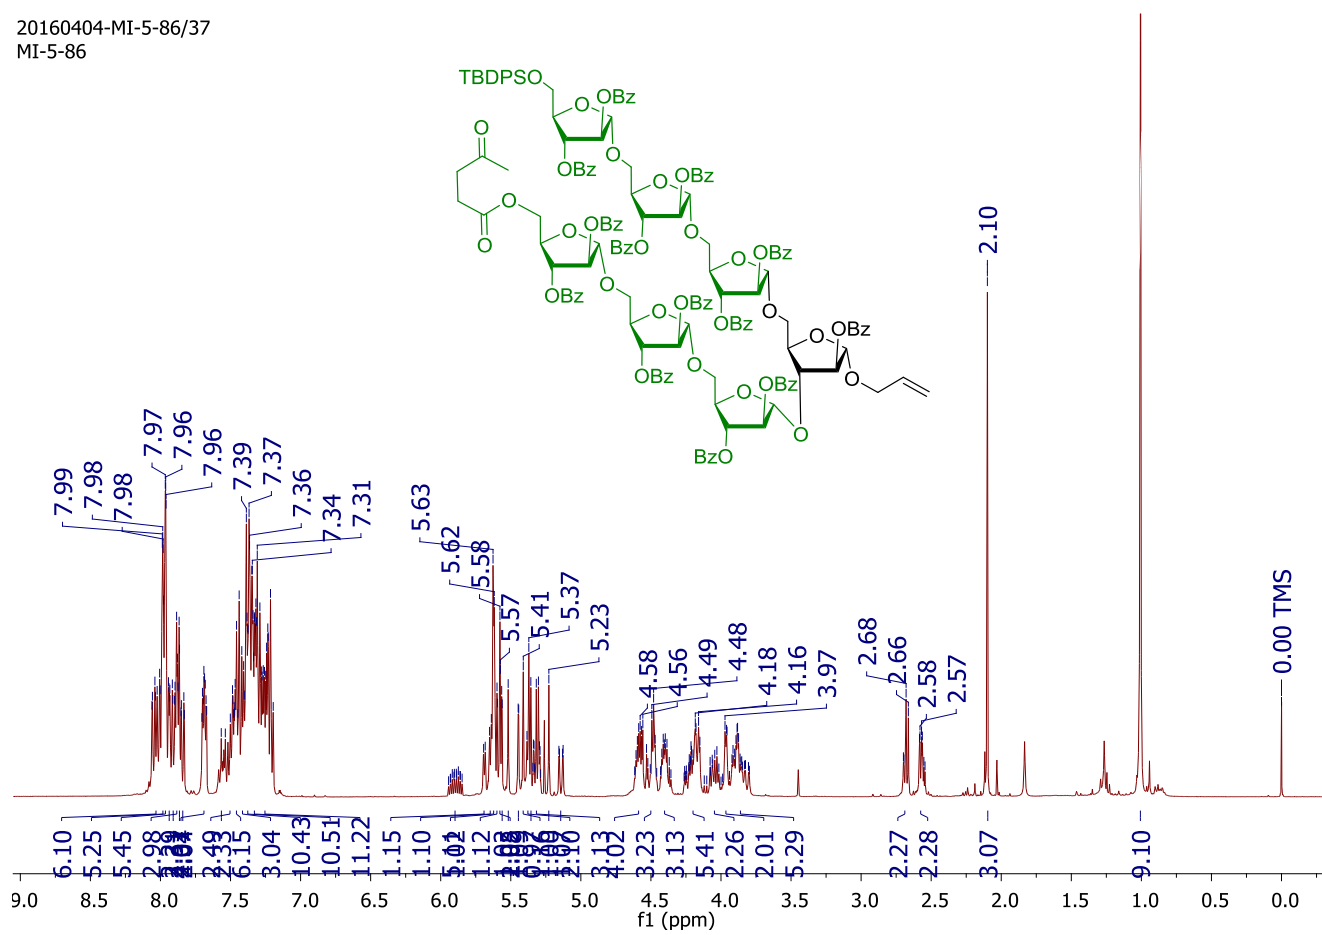

<sup>13</sup>C NMR Spectrum (100.53 MHz, CDCl<sub>3</sub>) of Compound **34**

20160404-MI-5-86.39.fid  
MI-5-86

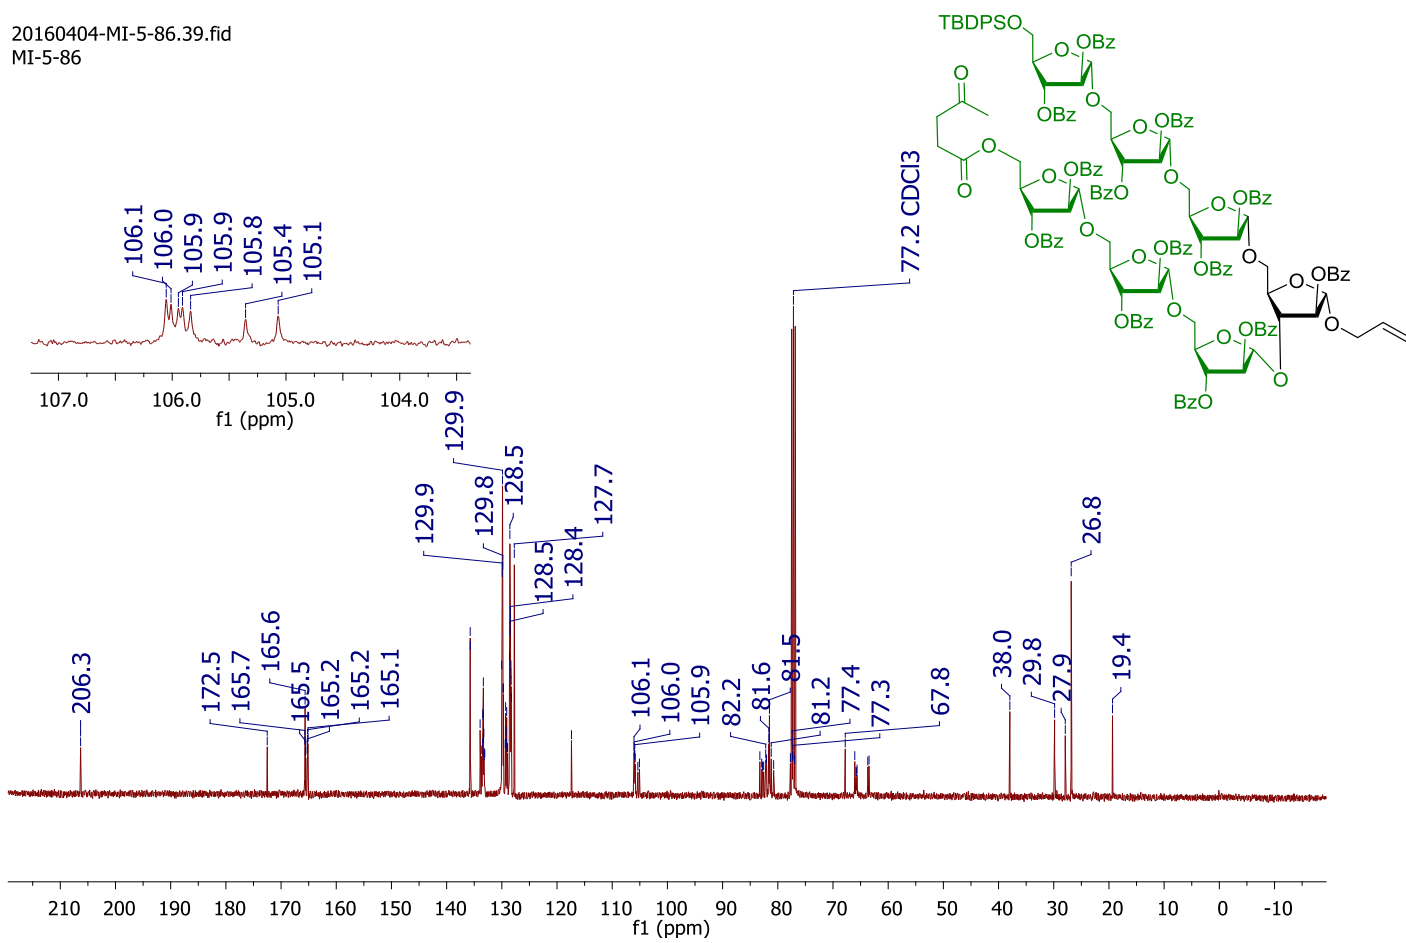

DEPT Spectrum (100.53 MHz, CDCl<sub>3</sub>) of Compound **34**

20160404-MI-5-86.40.fid  
MI-5-86

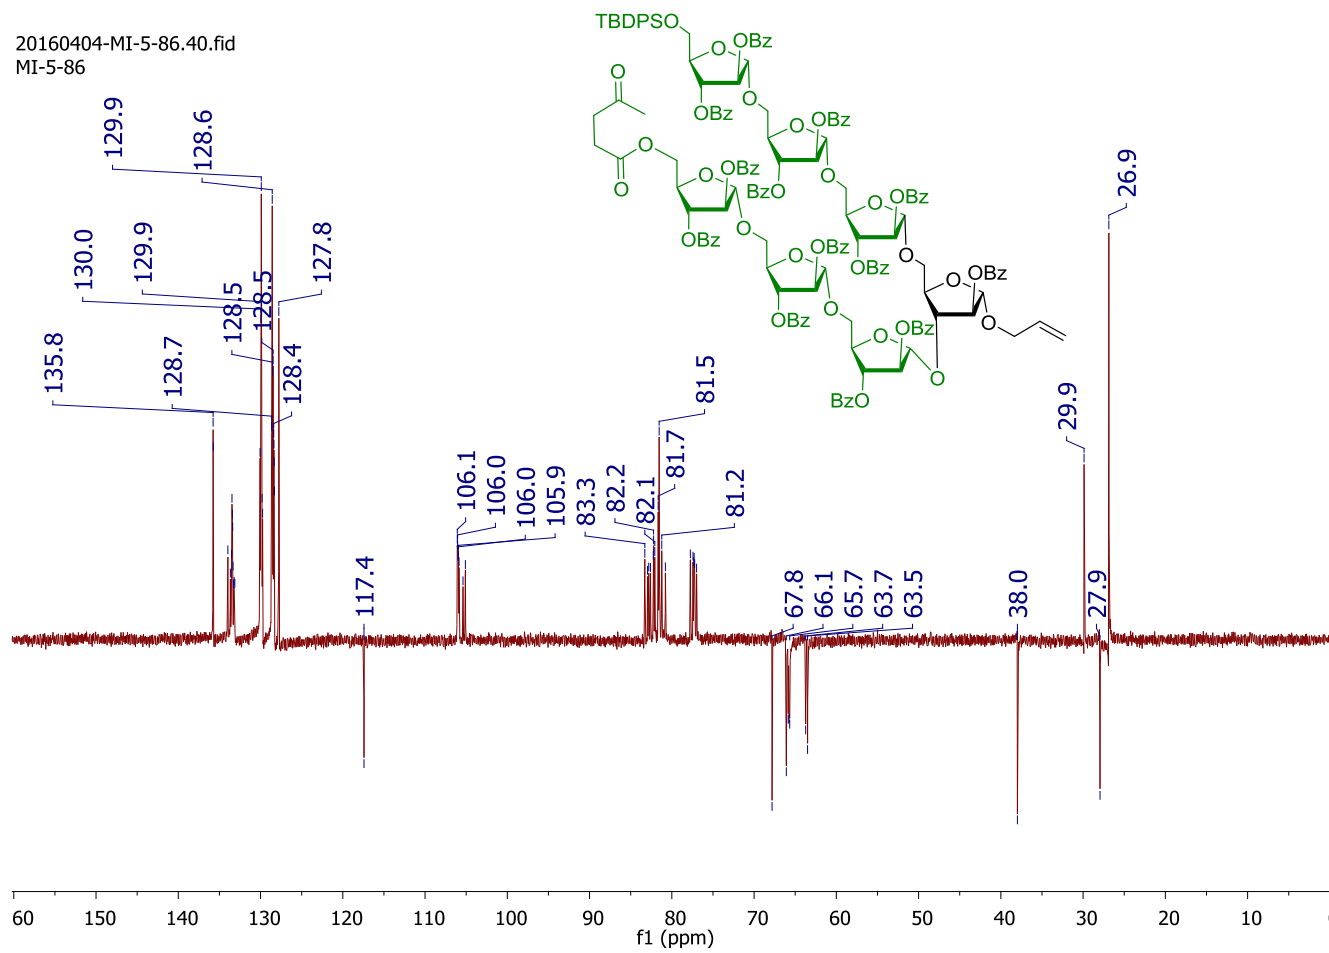

<sup>1</sup>H NMR Spectrum (399.78 MHz, CDCl<sub>3</sub>) of Compound **6**

20160513-MI-5-105A

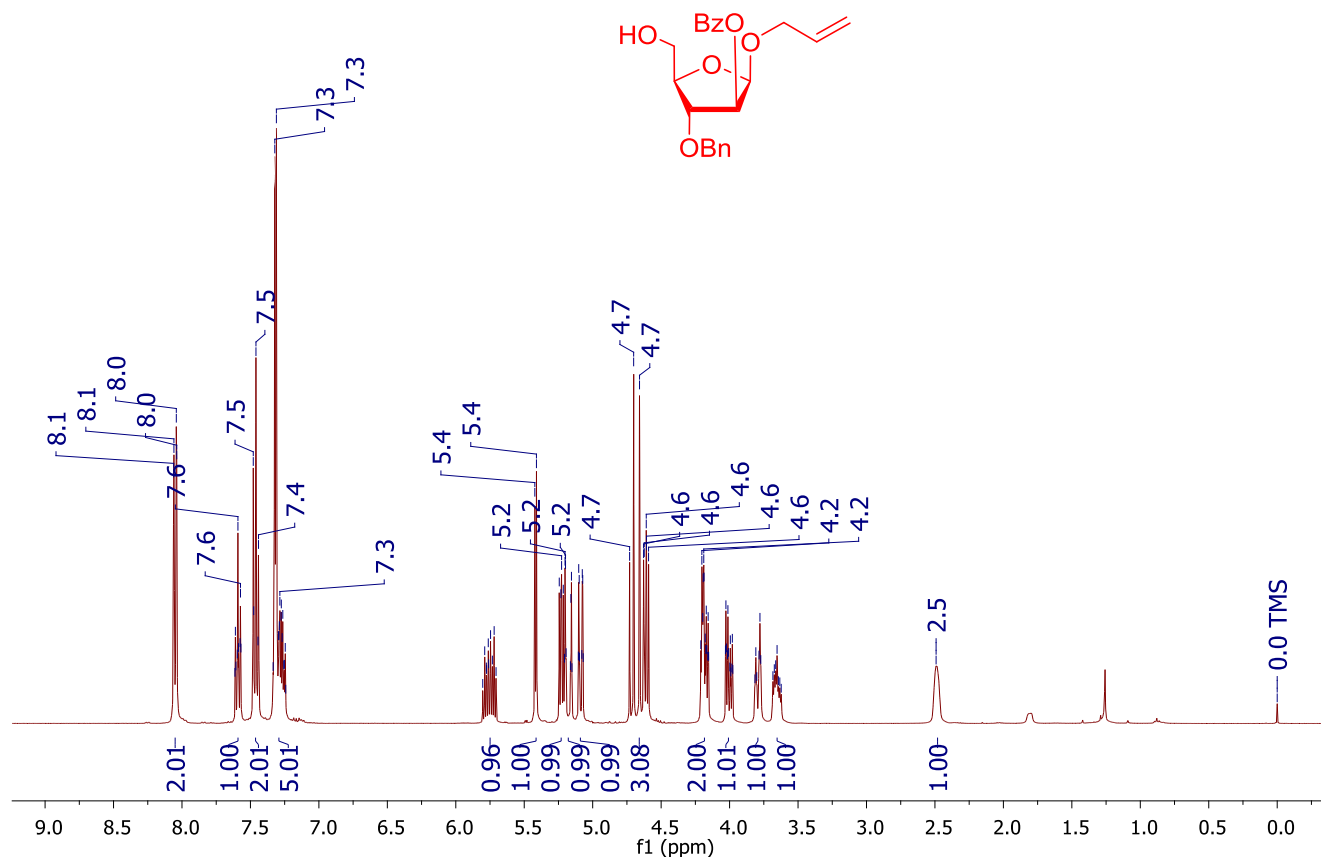

$^{13}\text{C}$  NMR Spectrum (100.53 MHz,  $\text{CDCl}_3$ ) of Compound **6**

20160513-MI-5-105A

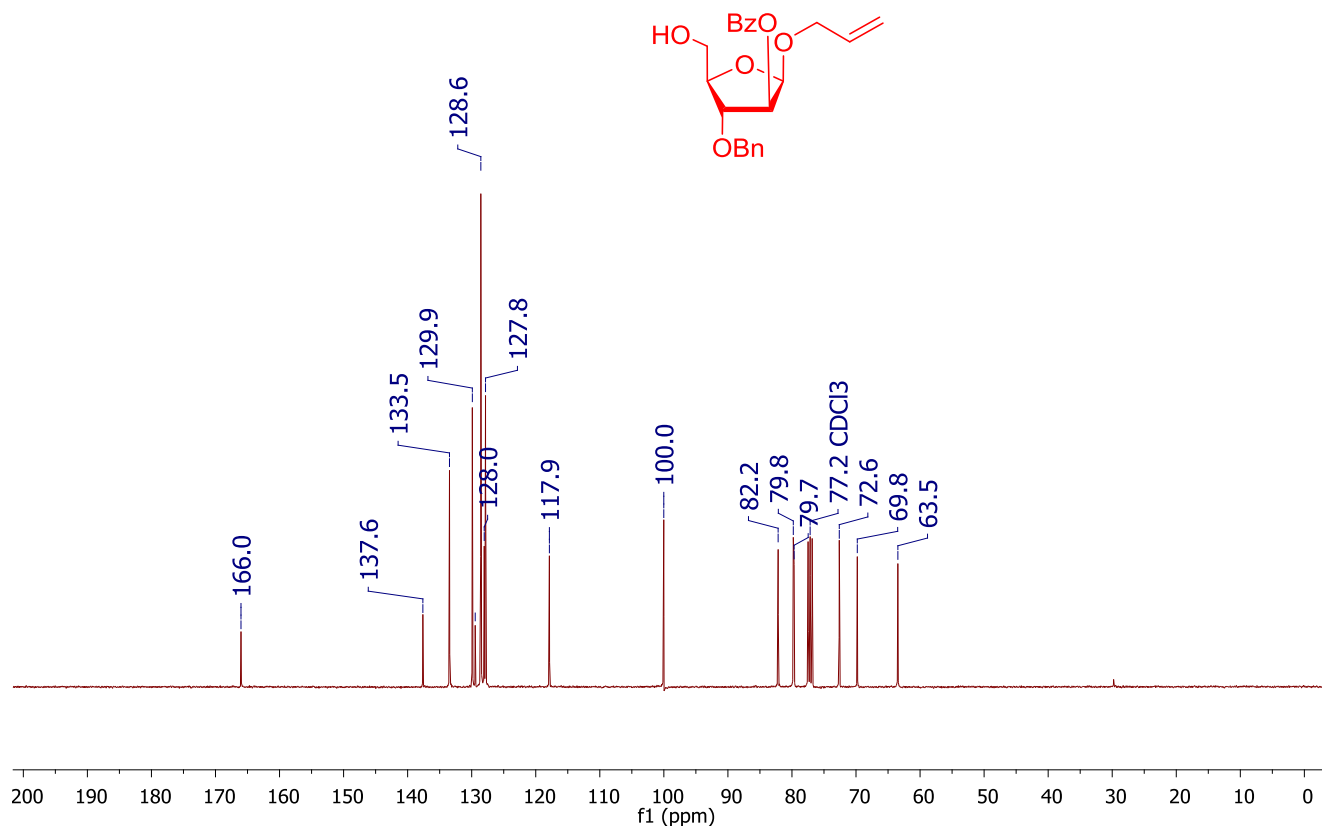

# DEPT Spectrum (100.53 MHz, CDCl<sub>3</sub>) of Compound 6

20160513-MI-5-105A

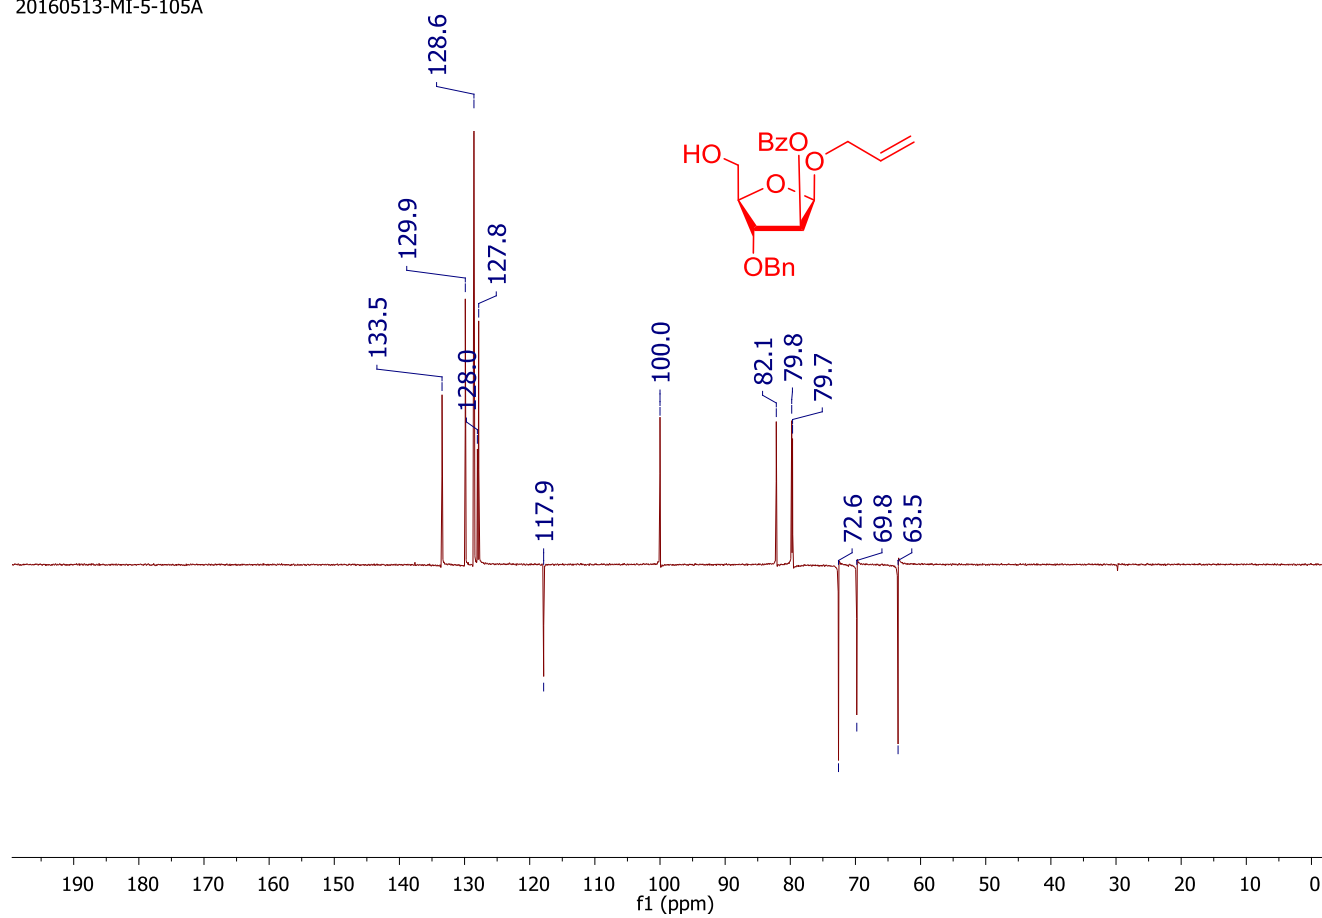

<sup>1</sup>H NMR Spectrum (399.78 MHz, CDCl<sub>3</sub>) of Compound **35**

20160319-MI-5-61A

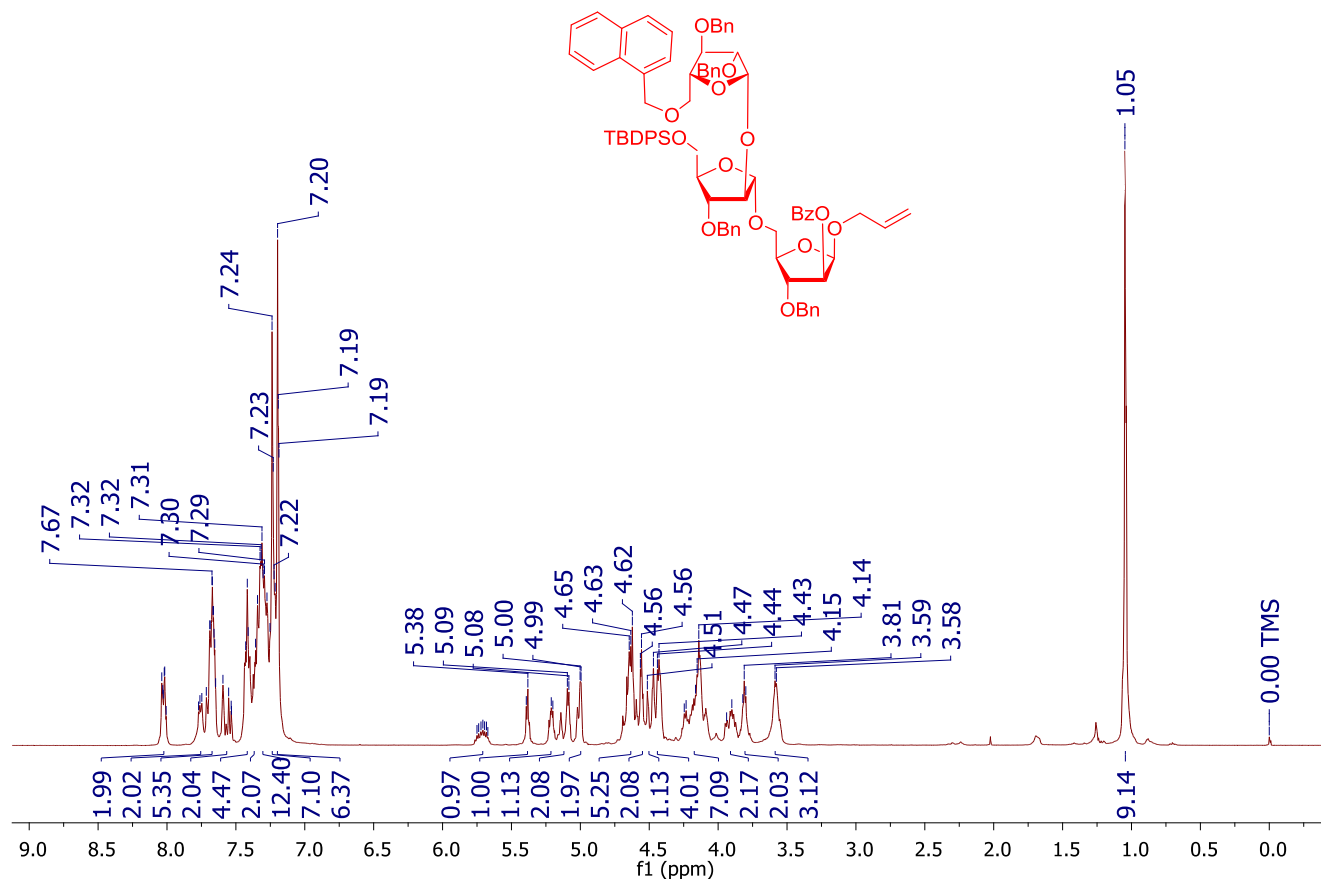



<sup>13</sup>C NMR Spectrum (100.53 MHz, CDCl<sub>3</sub>) of Compound **35**

20160319-MI-5-61A

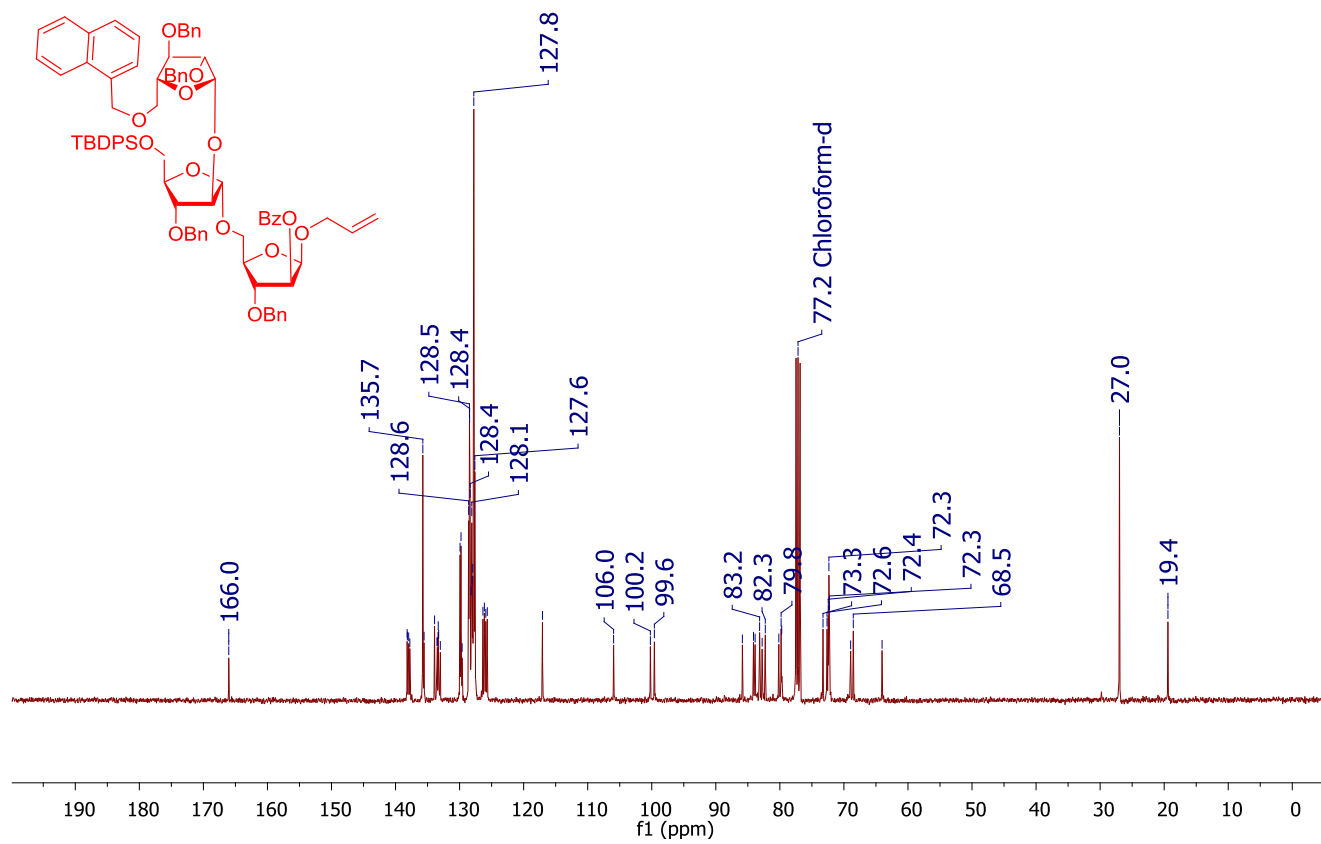

# DEPT Spectrum (100.53 MHz, CDCl<sub>3</sub>) of Compound **35**

20160319-MI-5-61A

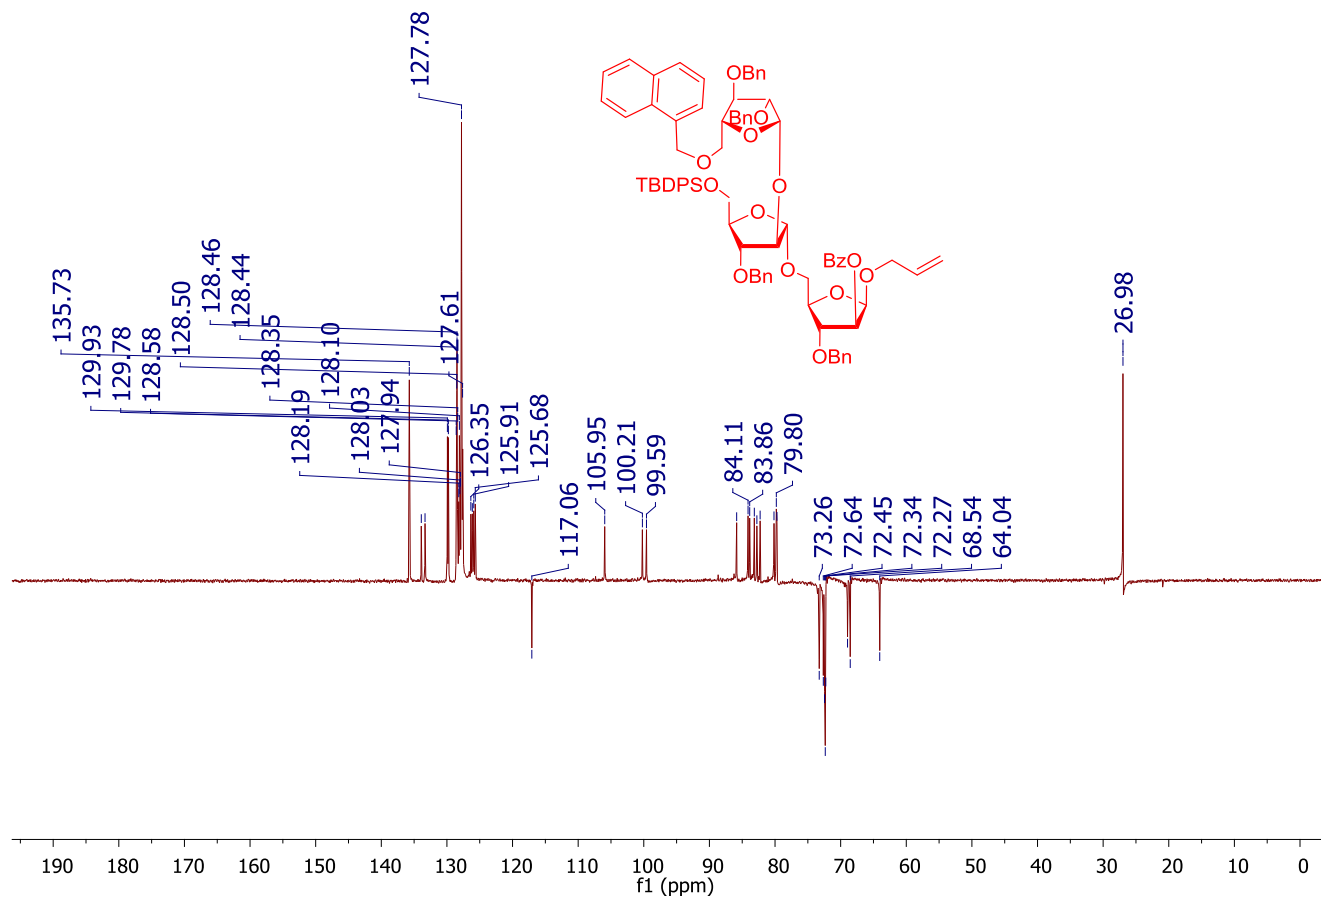

# <sup>1</sup>H NMR Spectrum (399.78 MHz, CDCl<sub>3</sub>) of Compound **37**

20160326-MI-5-75/1  
MI-5-75

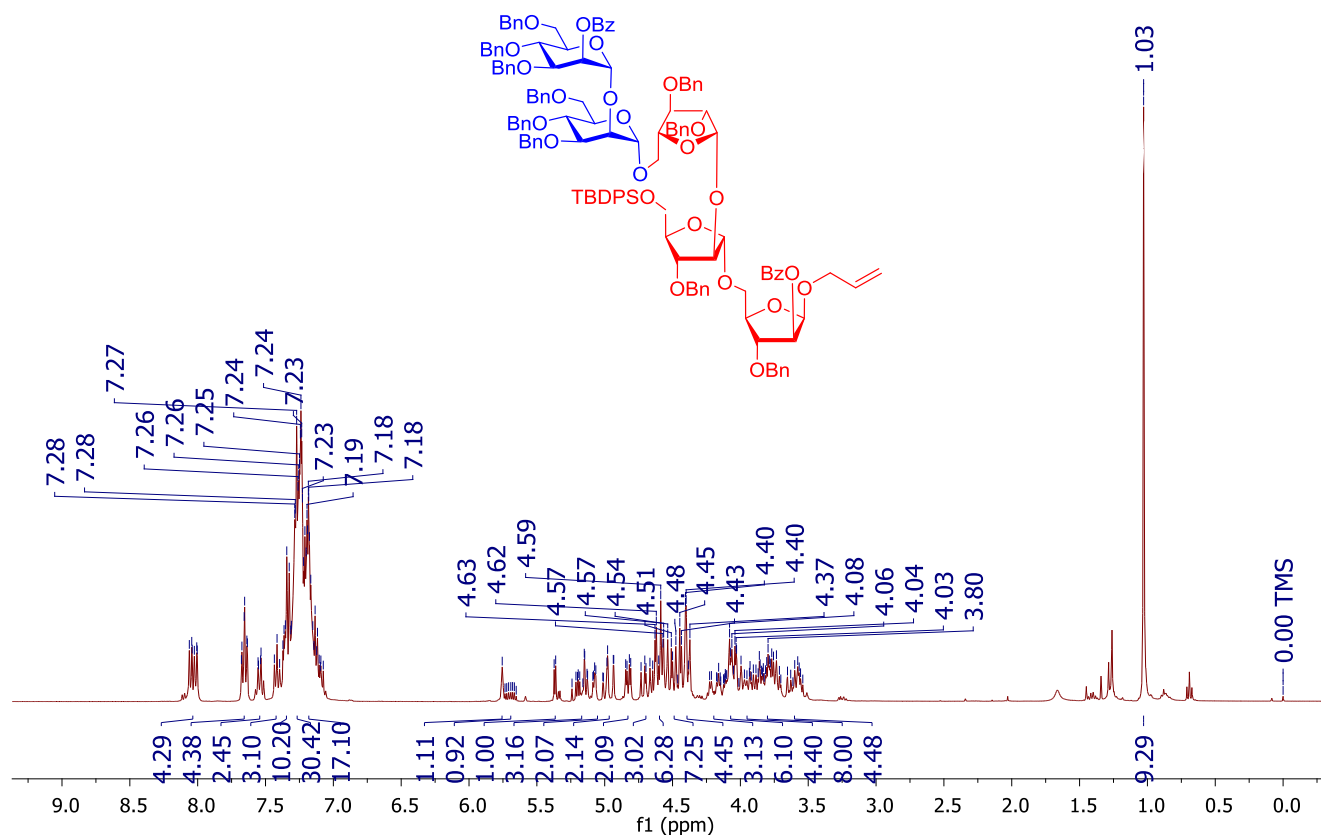

<sup>13</sup>C NMR Spectrum (100.53 MHz, CDCl<sub>3</sub>) of Compound **37**

20160326-MI-5-75/2  
MI-5-75

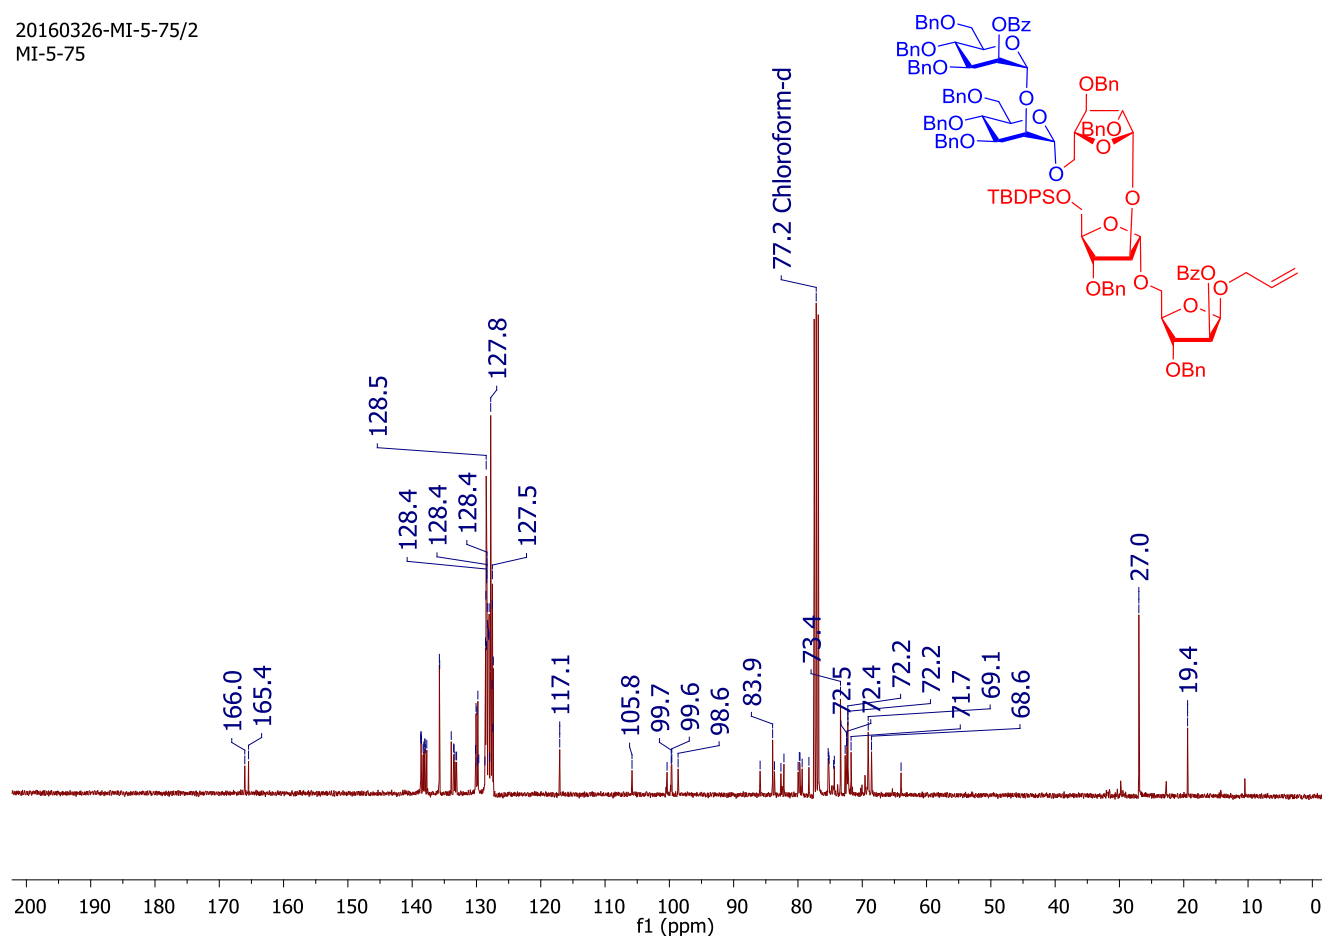

# DEPT Spectrum (100.53 MHz, CDCl<sub>3</sub>) of Compound **37**

20160326-MI-5-75/3  
MI-5-75

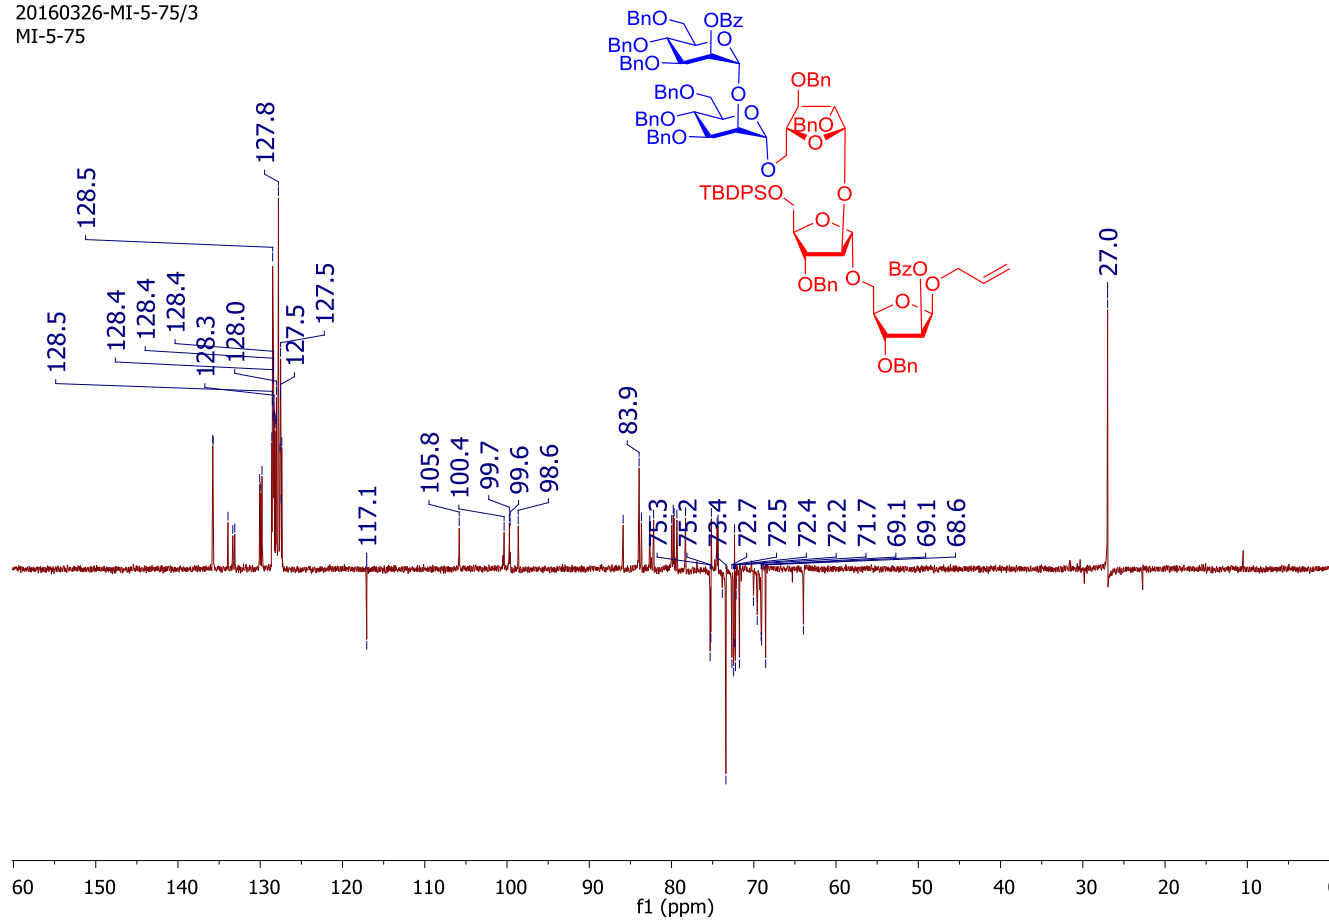

# <sup>1</sup>H NMR Spectrum (399.78 MHz, CDCl<sub>3</sub>) of Compound **38**

20160502-MI-5-84A.13.fid  
MI-5-84A

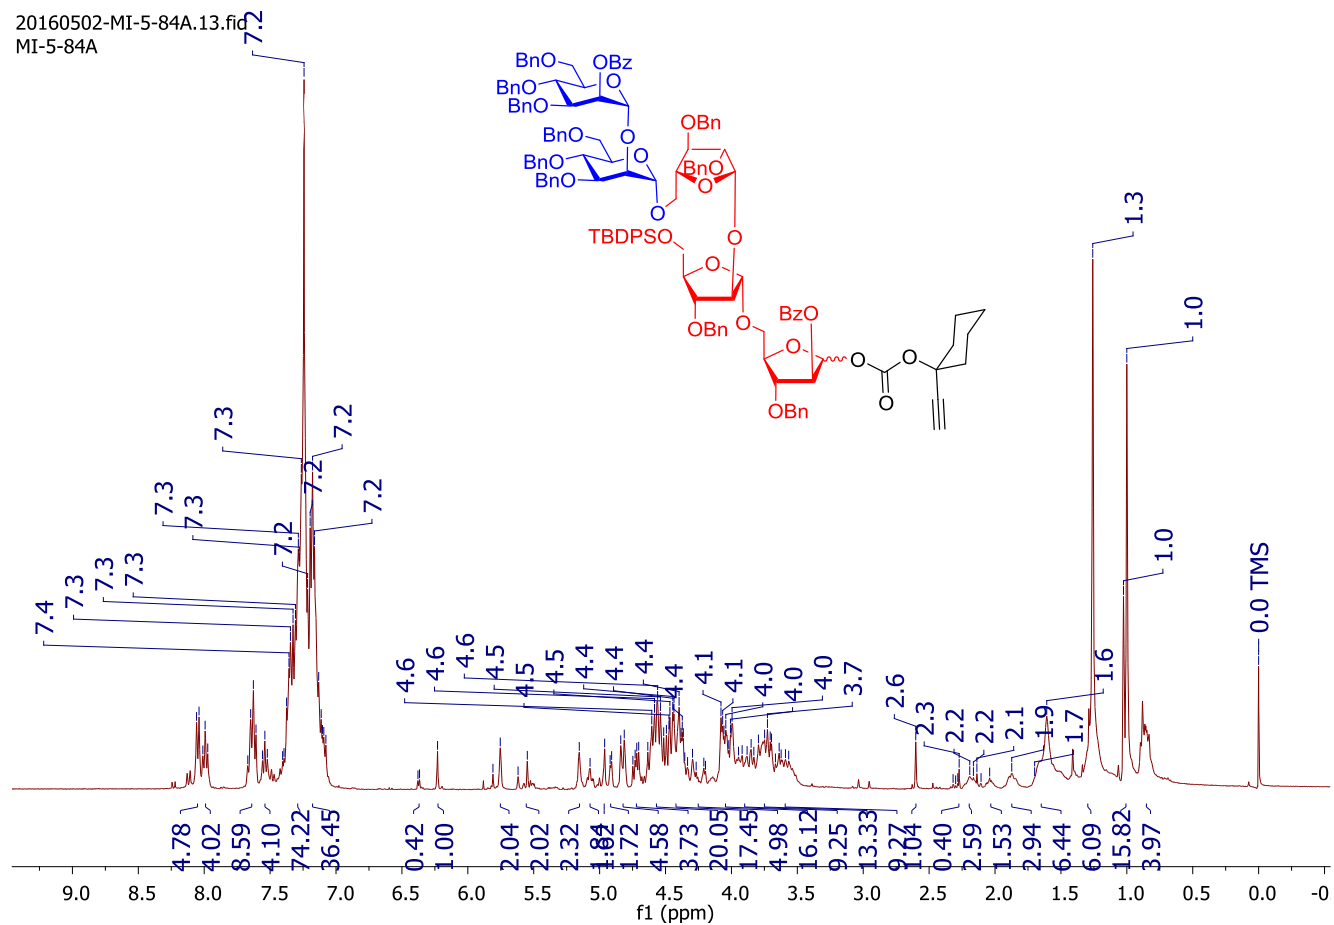

<sup>13</sup>C NMR Spectrum (100.53 MHz, CDCl<sub>3</sub>) of Compound **38**

20160502-MI-5-84A.15.fid  
MI-5-84A

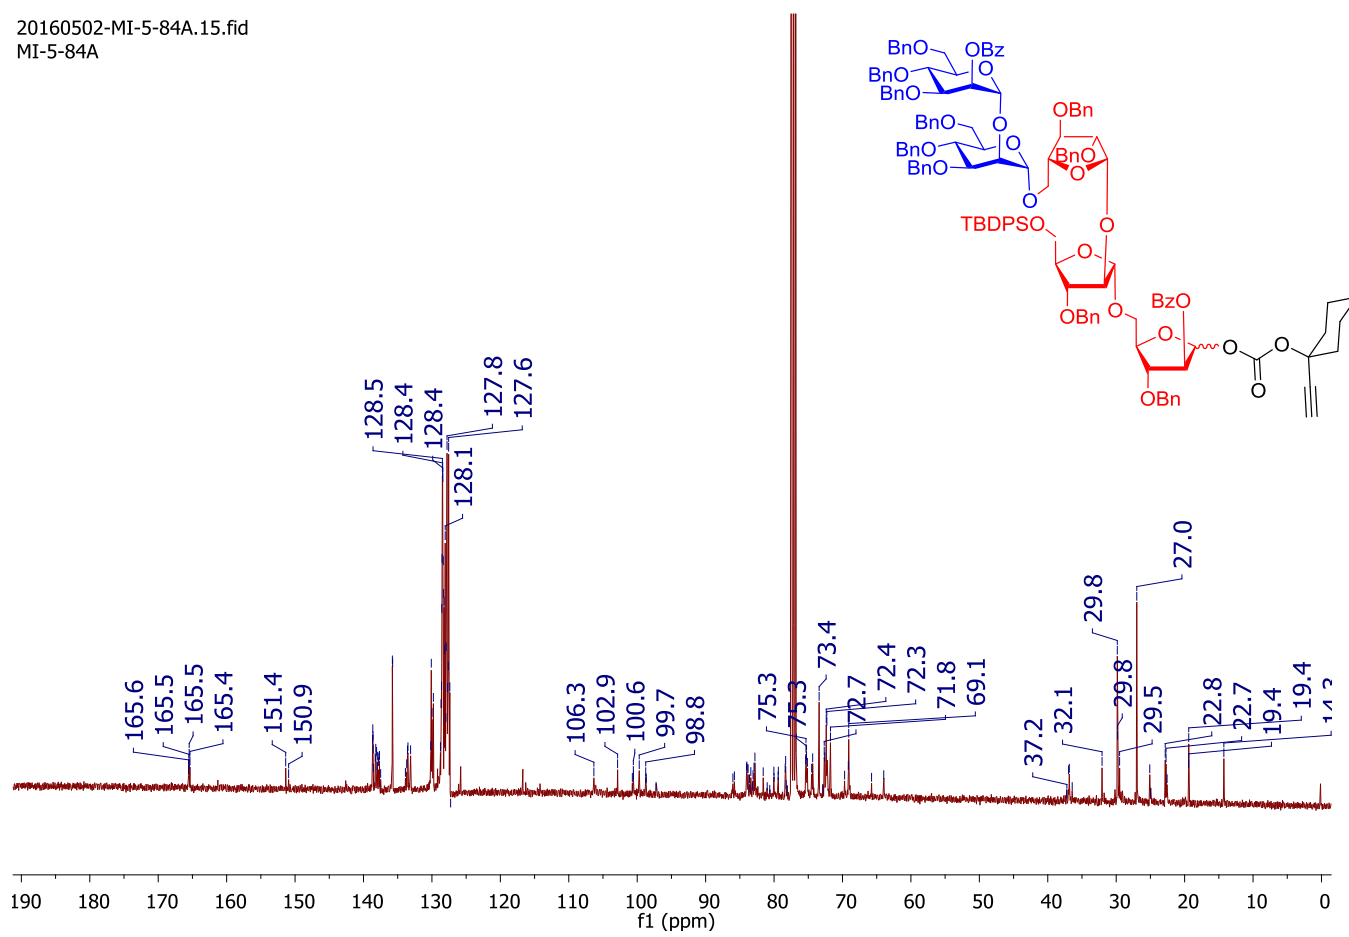

DEPT Spectrum (100.53 MHz, CDCl<sub>3</sub>) of Compound **38**

20160502-MI-5-84A.16.fid  
MI-5-84A

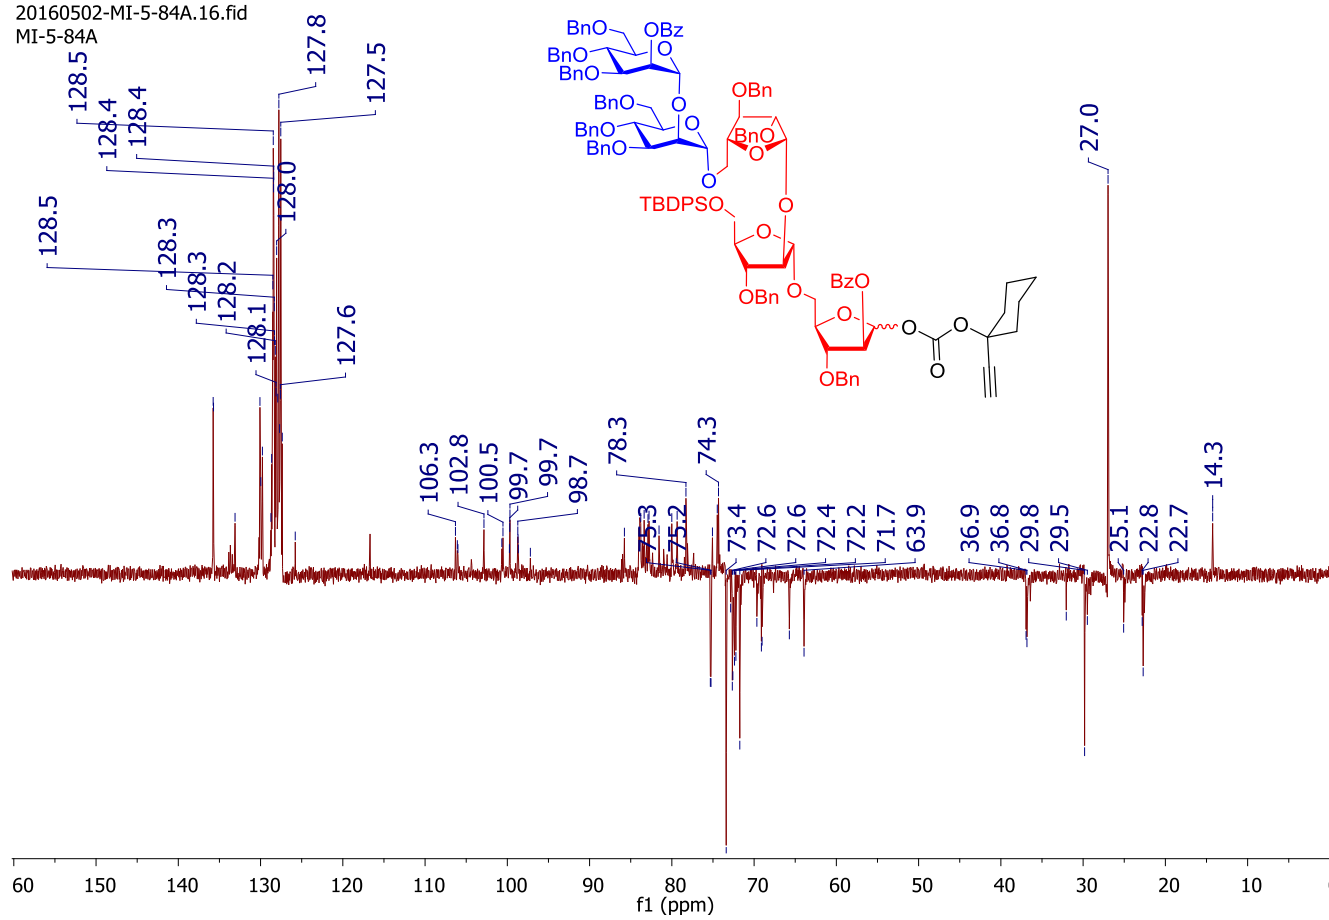



<sup>1</sup>H NMR Spectrum (399.78 MHz, CDCl<sub>3</sub>) of Compound **39**

20160404-MI-5-64A/1  
MI-5-64A

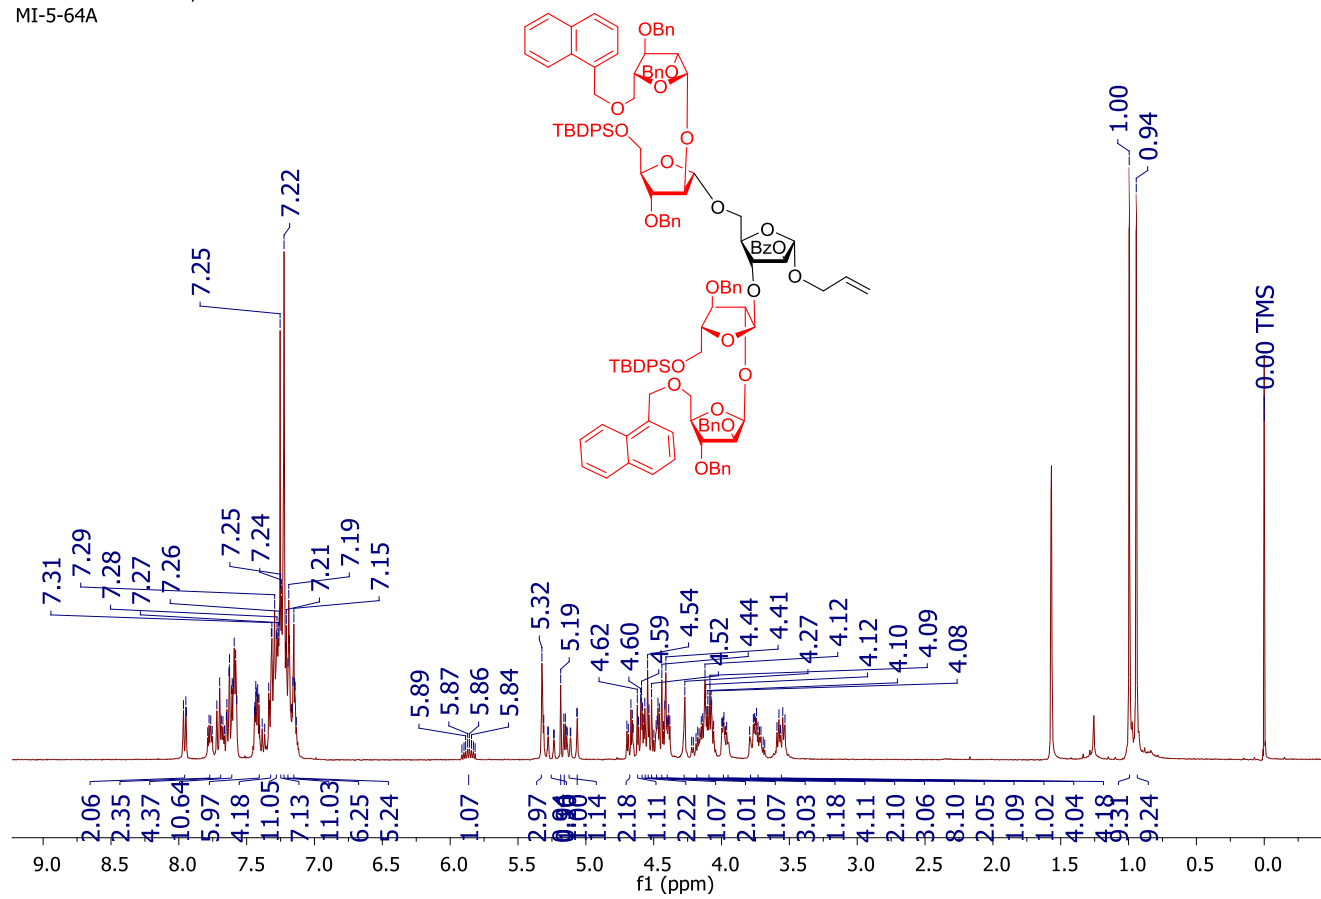

<sup>13</sup>C NMR Spectrum (100.53 MHz, CDCl<sub>3</sub>) of Compound **39**

20150315-MI-5-64/1  
MI-5-64

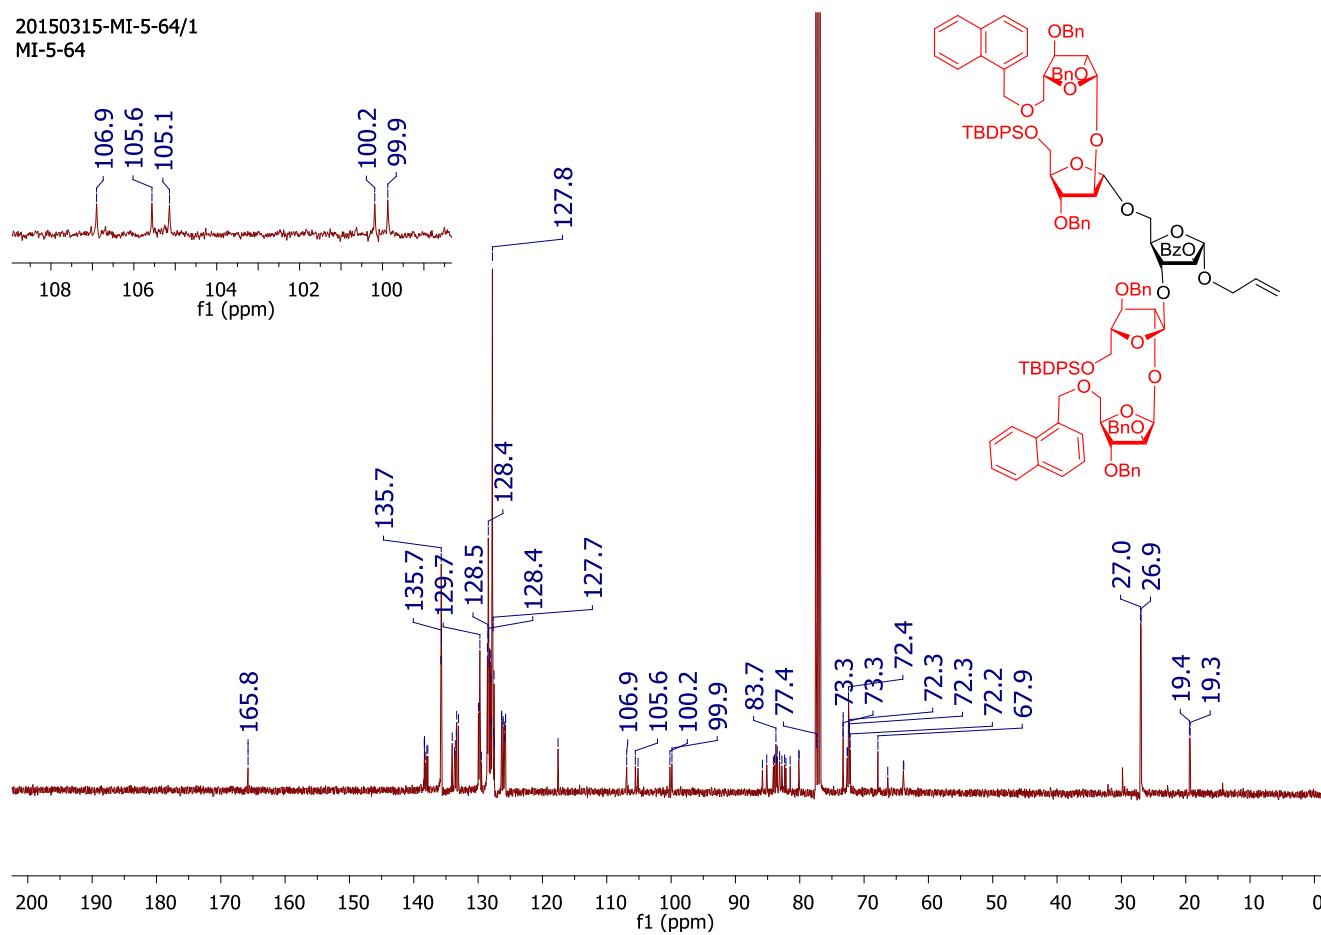

DEPT Spectrum (100.53 MHz, CDCl<sub>3</sub>) of Compound **39**

20150315-MI-5-64/2  
MI-5-64

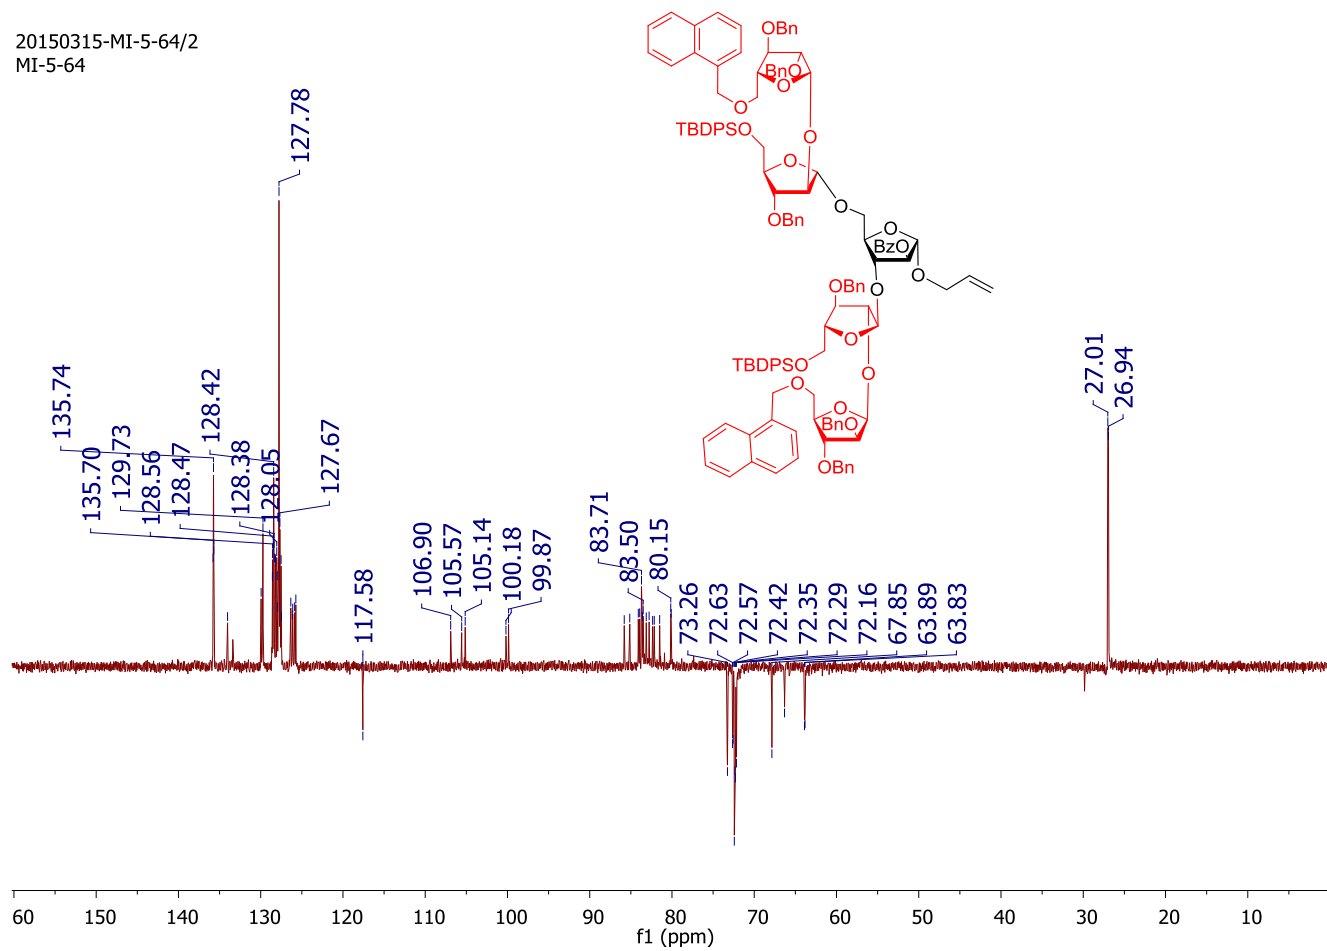



$^1\text{H}$ - $^{13}\text{C}$  HMBC Spectrum (399.78/100.53 MHz,  $\text{CDCl}_3$ ) of Compound **39**

20160824-MI-5-64 4 1 "E:\MAIDUL\NMR\aug 2016 bruker\20160824-MI-5-64.4"

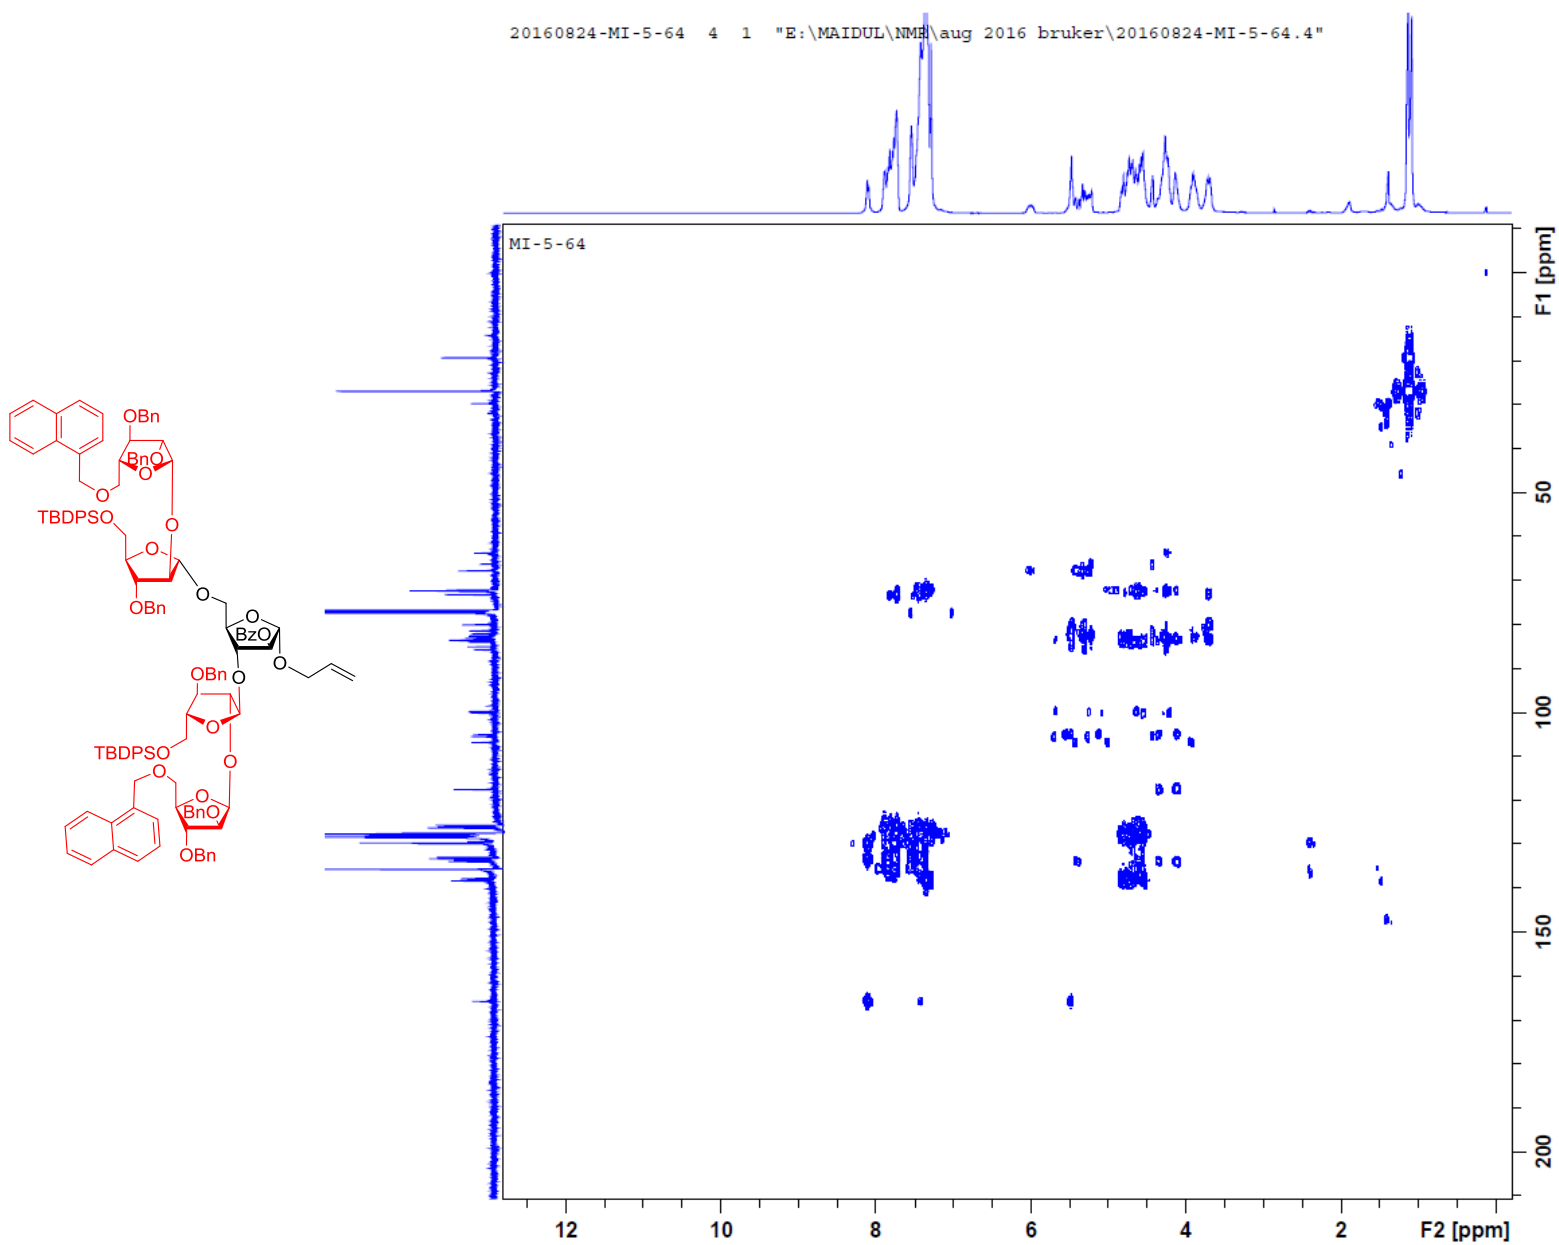

gHSQC Spectrum (399.78/100.53 MHz, CDCl<sub>3</sub>) of Compound **39**

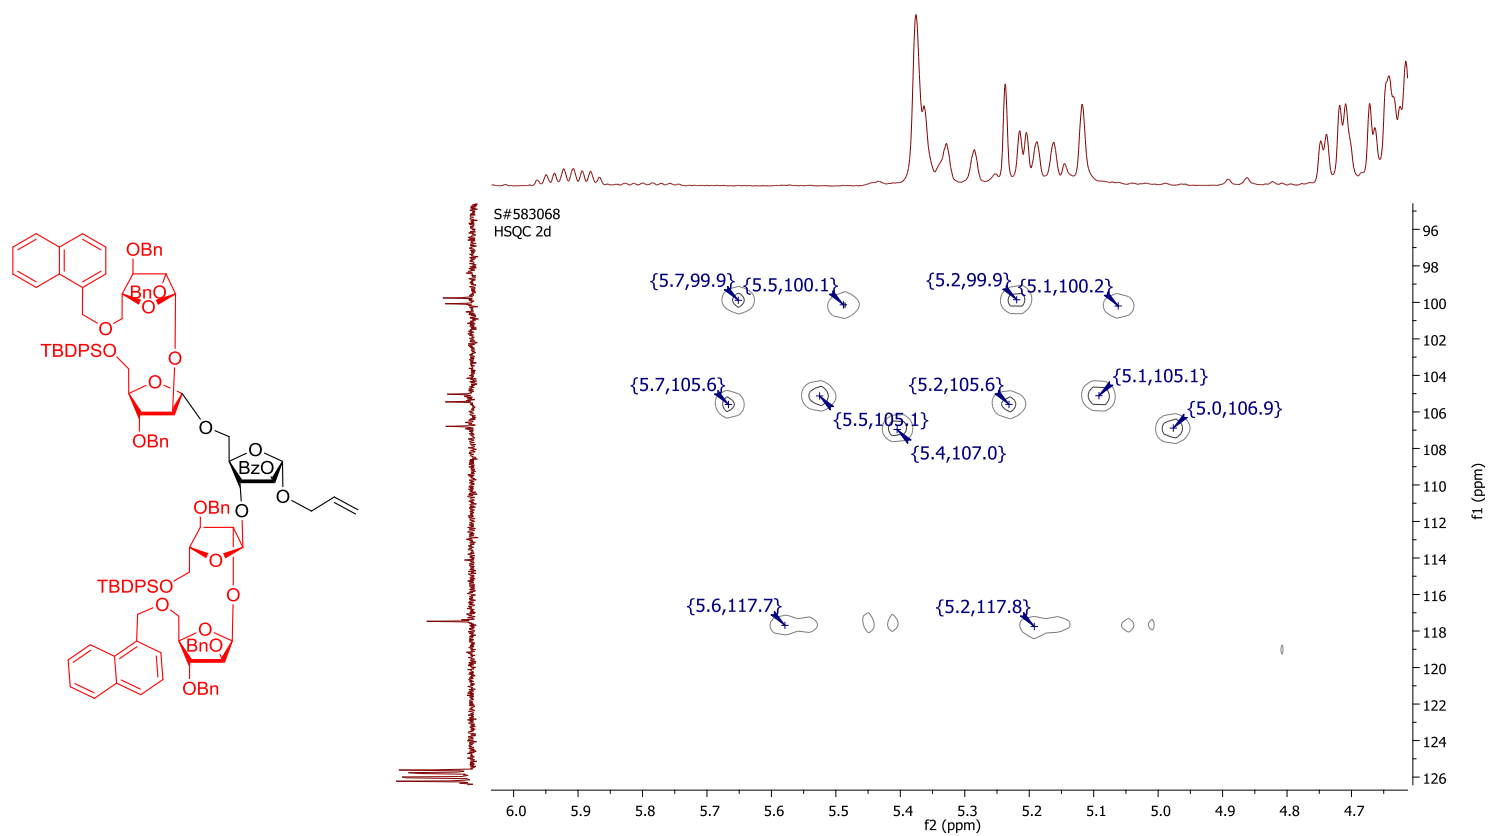

<sup>1</sup>H NMR Spectrum (399.78 MHz, CDCl<sub>3</sub>) of Compound **40**

20160407-GPS-182.25.fid  
GPS-182

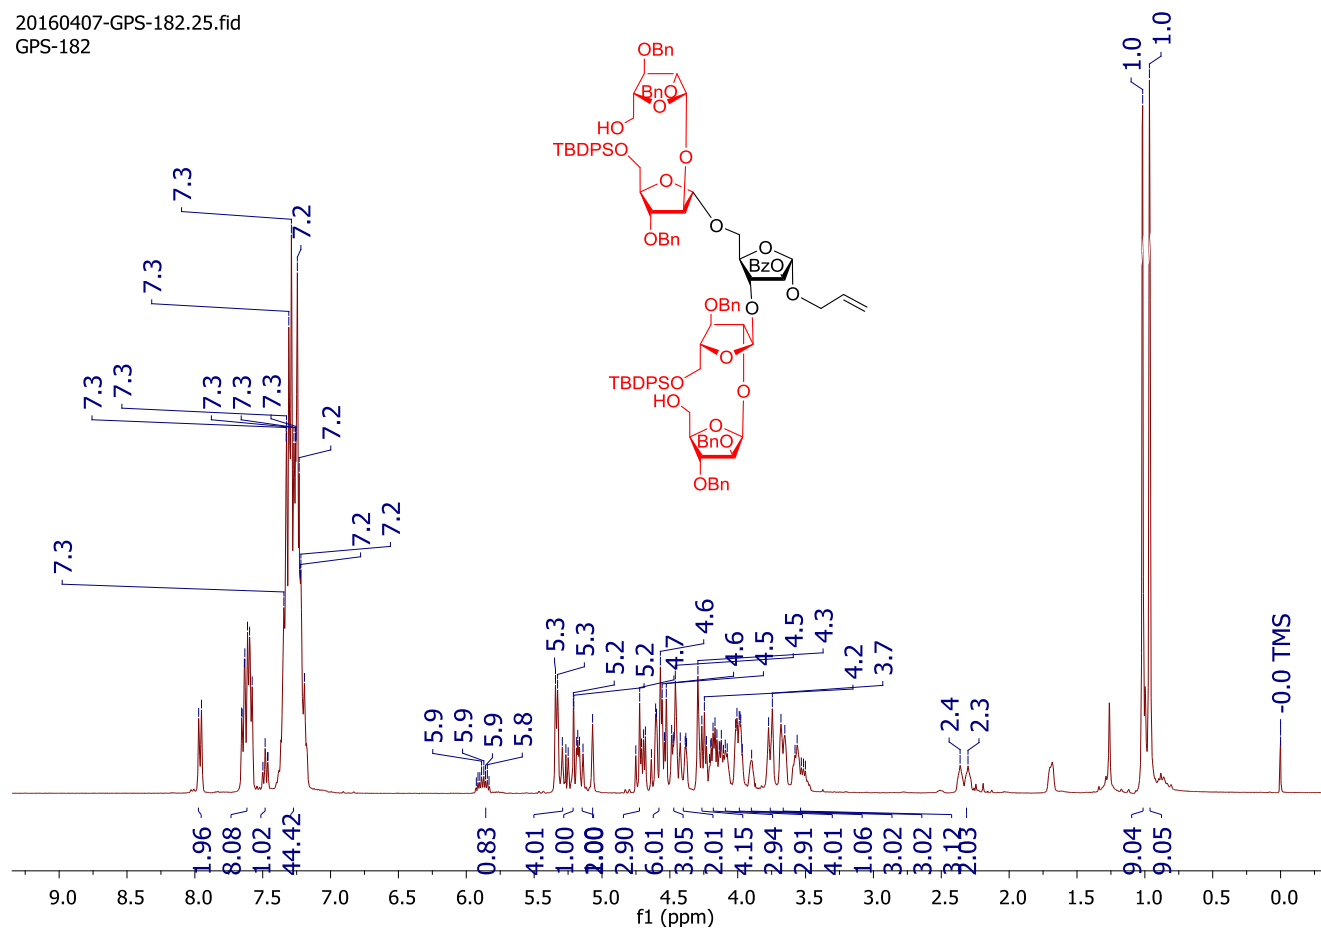

<sup>13</sup>C NMR Spectrum (100.53 MHz, CDCl<sub>3</sub>) of Compound **40**

20160407-GPS-182.27.fid  
GPS-182

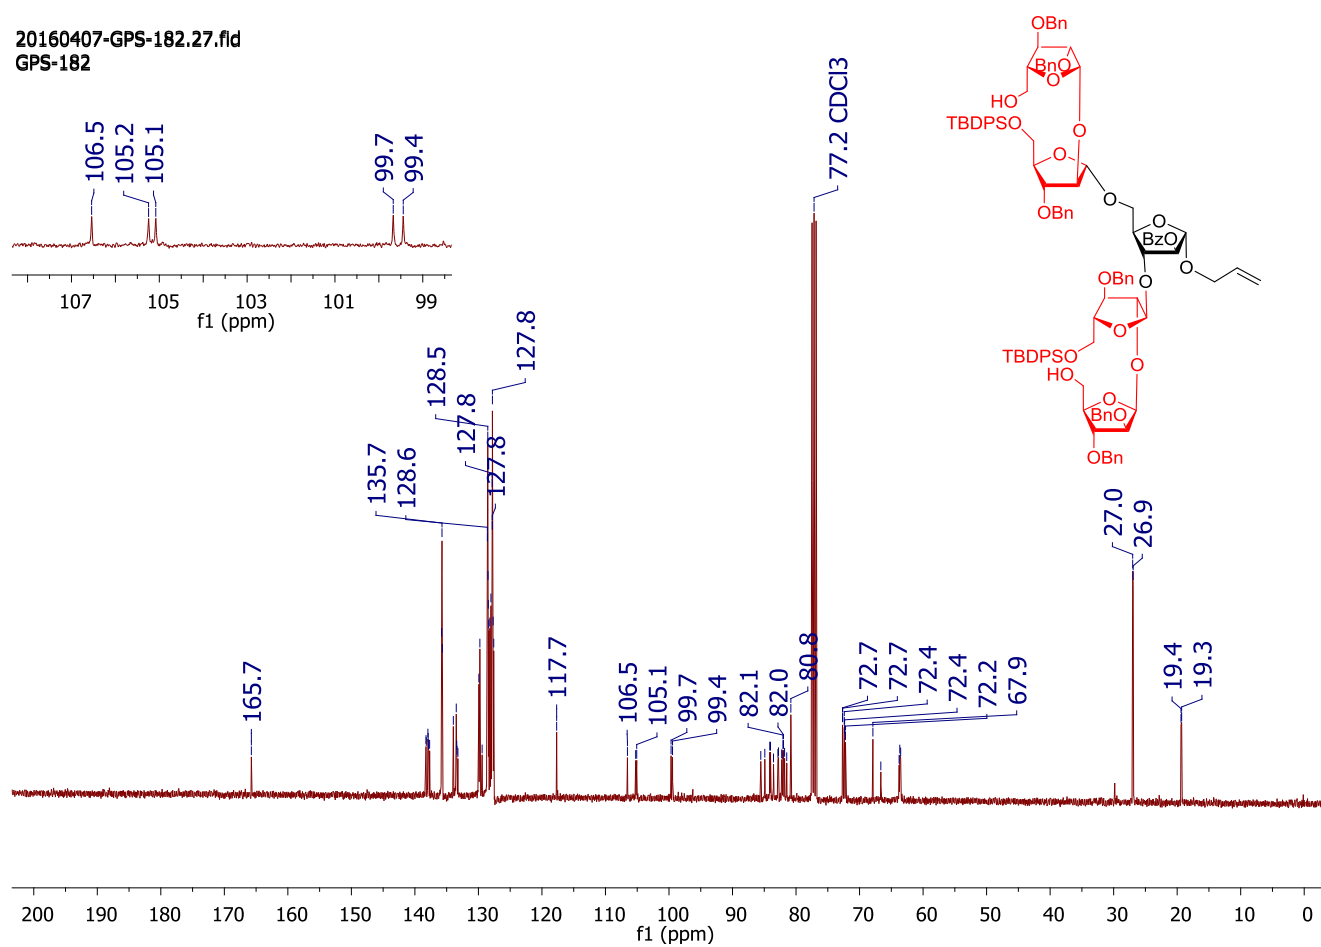



# DEPT Spectrum (100.53 MHz, CDCl<sub>3</sub>) of Compound **40**

20160407-GPS-182.28.fid  
GPS-182

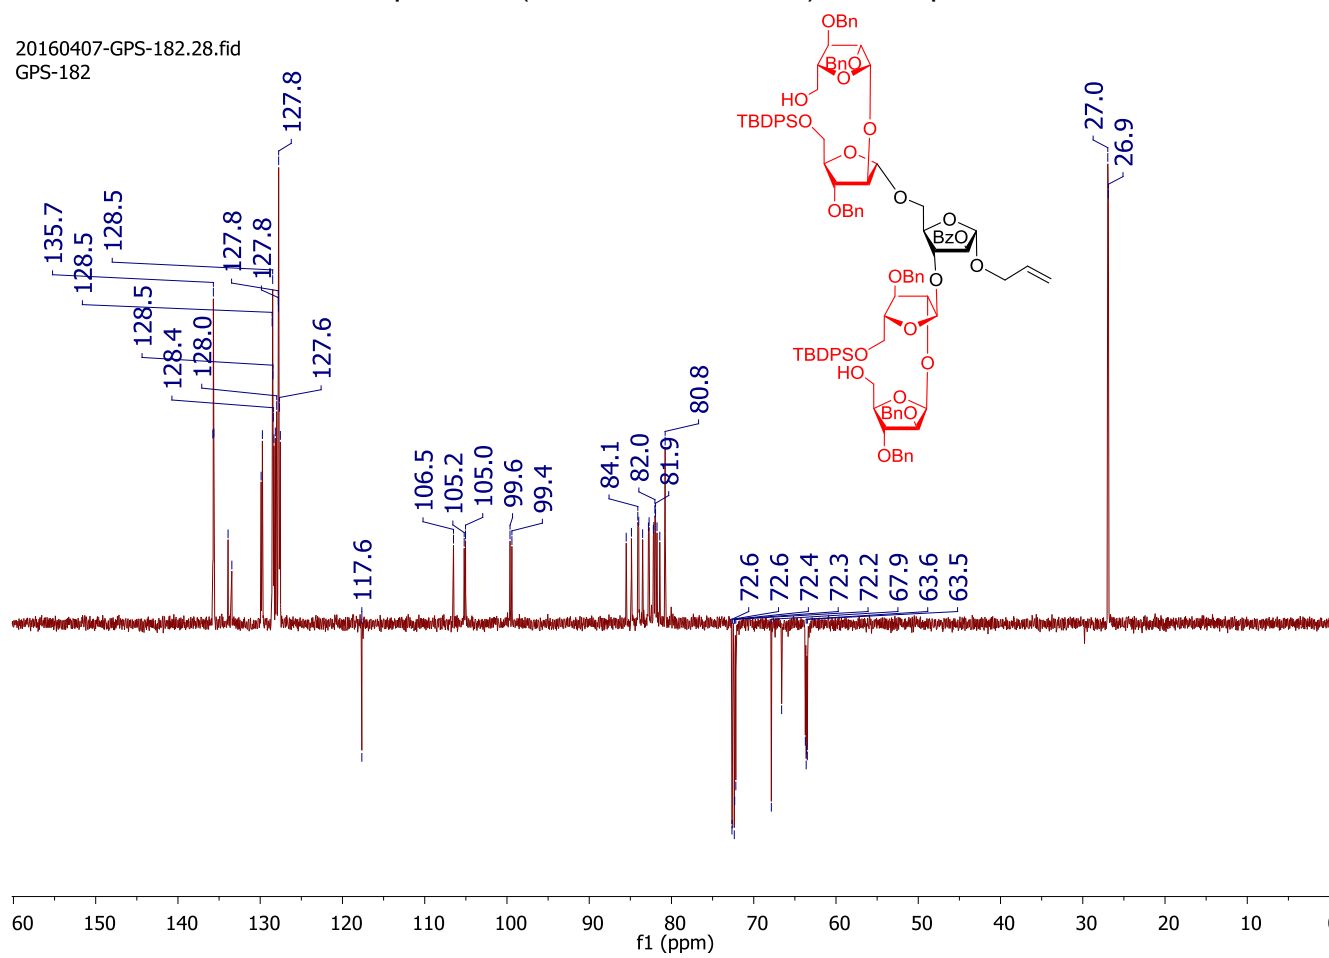

$^1\text{H}$ - $^1\text{H}$  COSY Spectrum (399.78 MHz,  $\text{CDCl}_3$ ) of Compound **40**

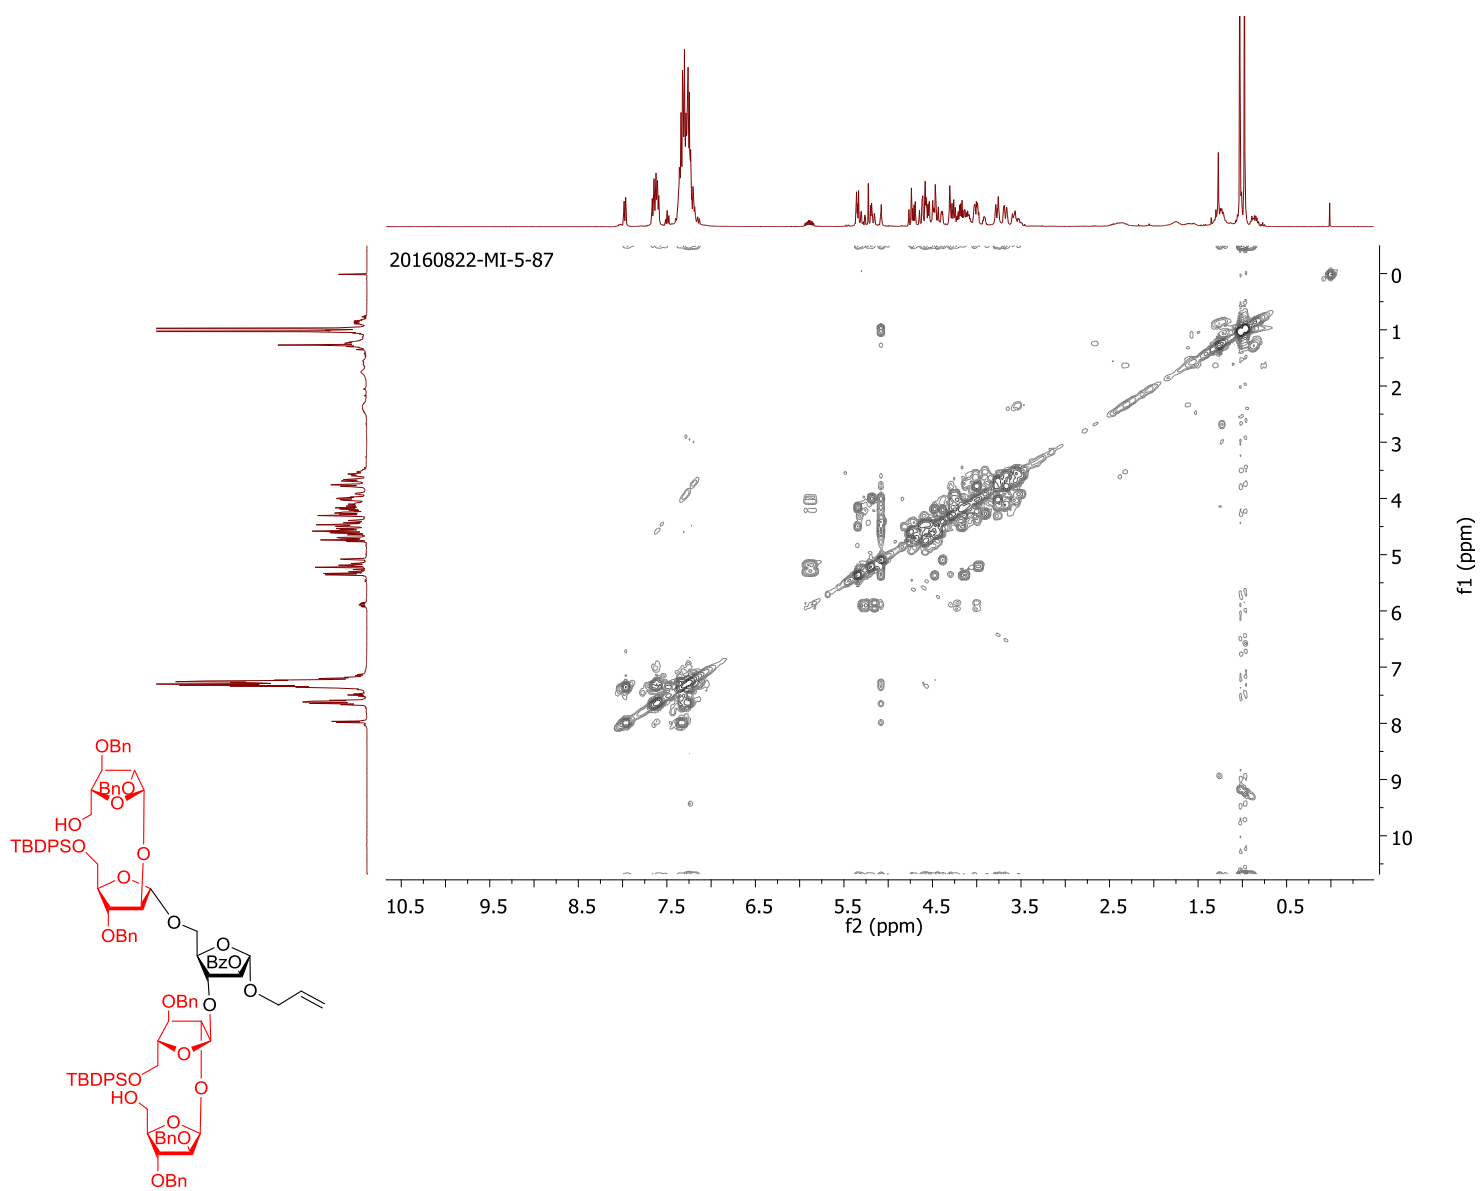

$^1\text{H}$ - $^{13}\text{C}$  HMBC Spectrum (399.78/100.53 MHz,  $\text{CDCl}_3$ ) of Compound **40**

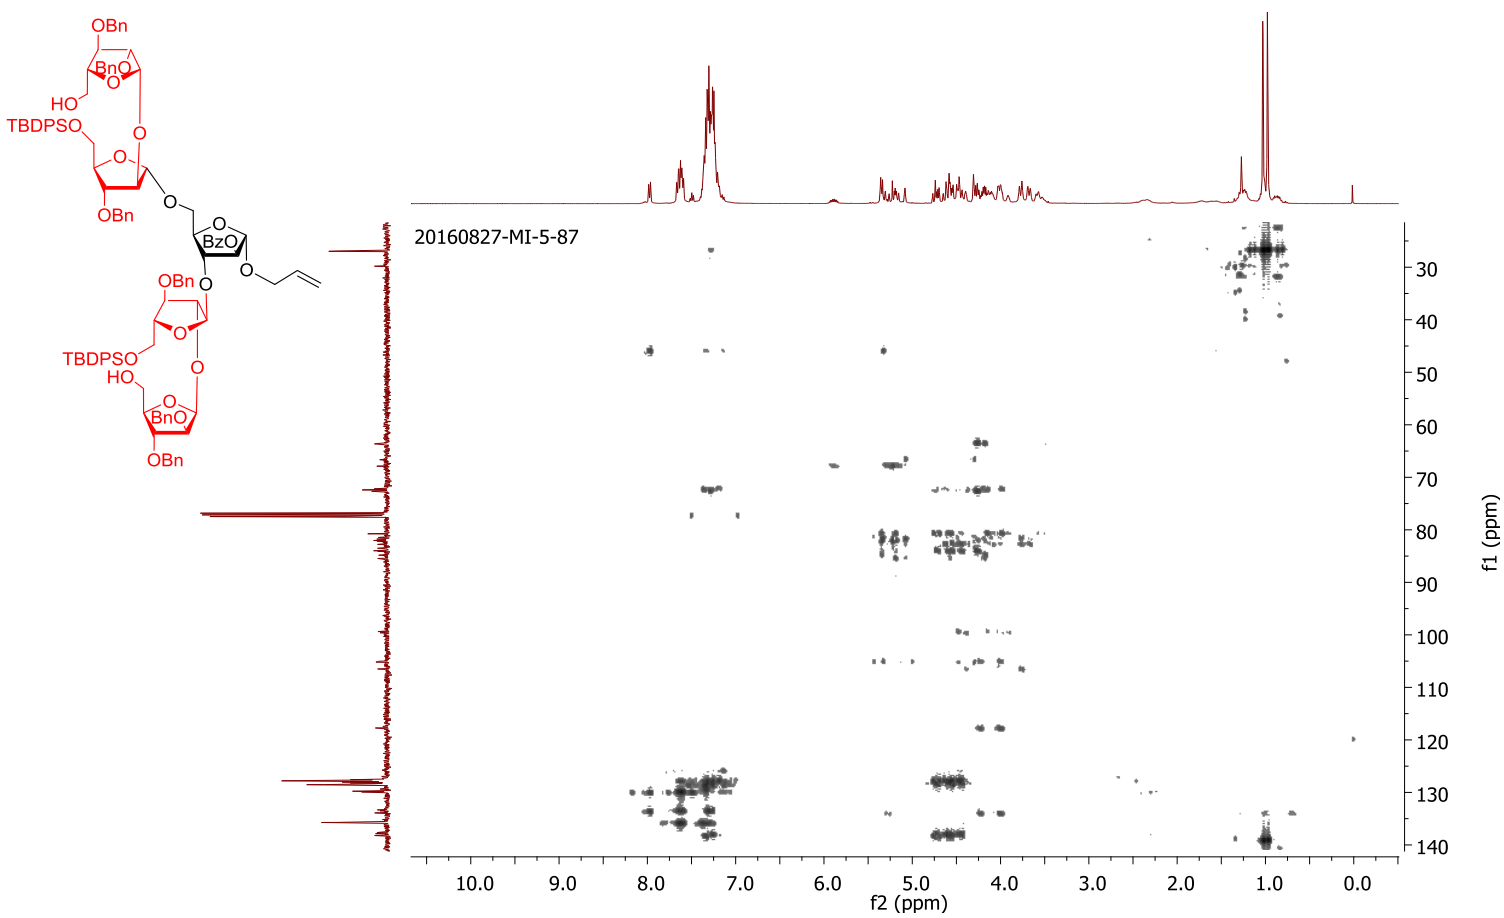

gHSQC Spectrum (399.78/100.53 MHz, CDCl<sub>3</sub>) of Compound **40**

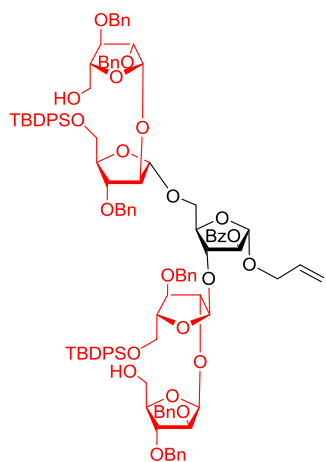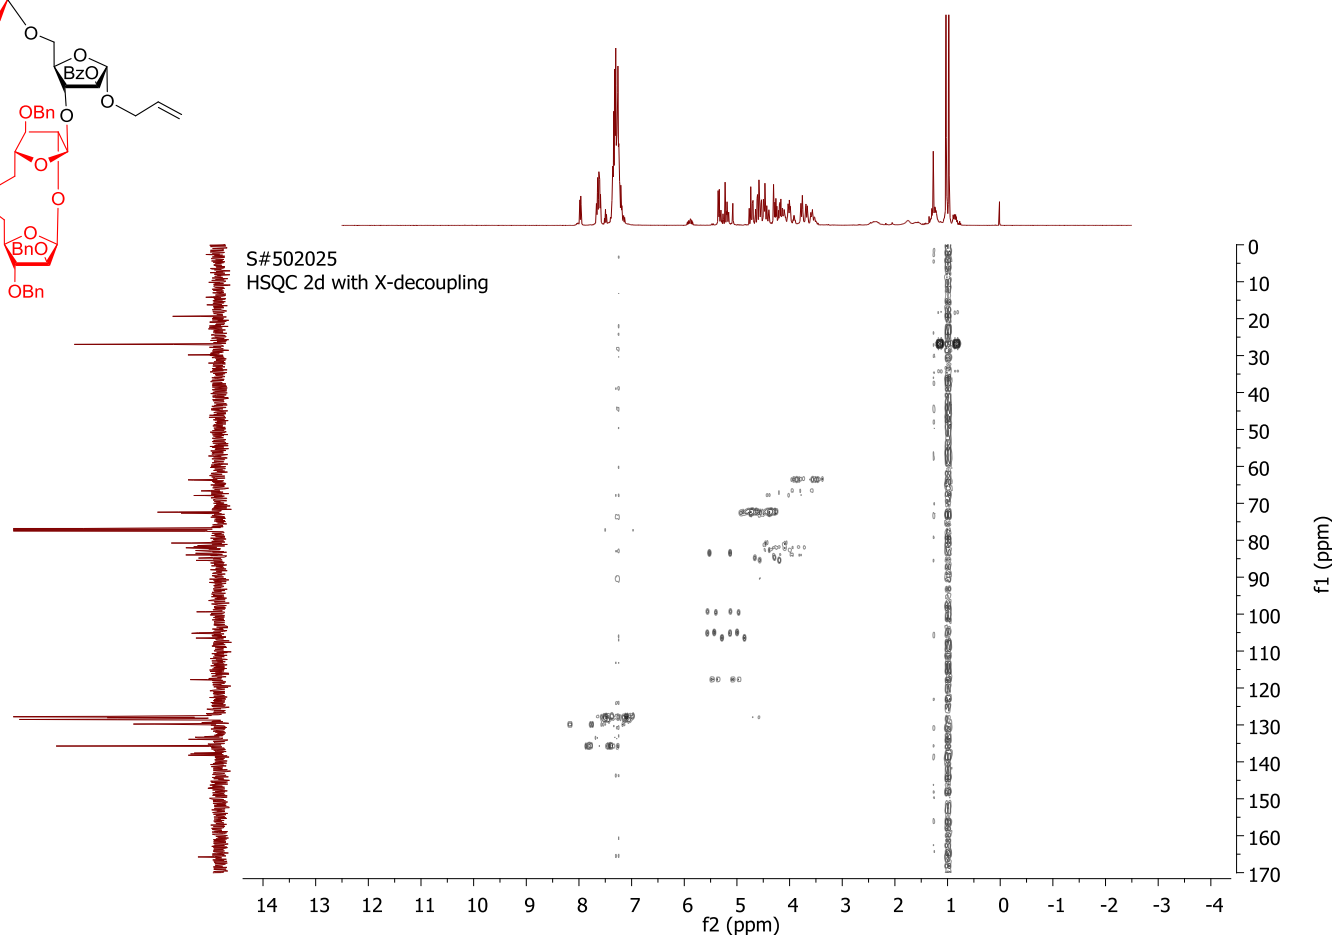

# $^1\text{H}$ NMR Spectrum (399.78 MHz, $\text{CDCl}_3$ ) of Compound 41

20160413-MI-5-93.1.fid  
MI-5-93

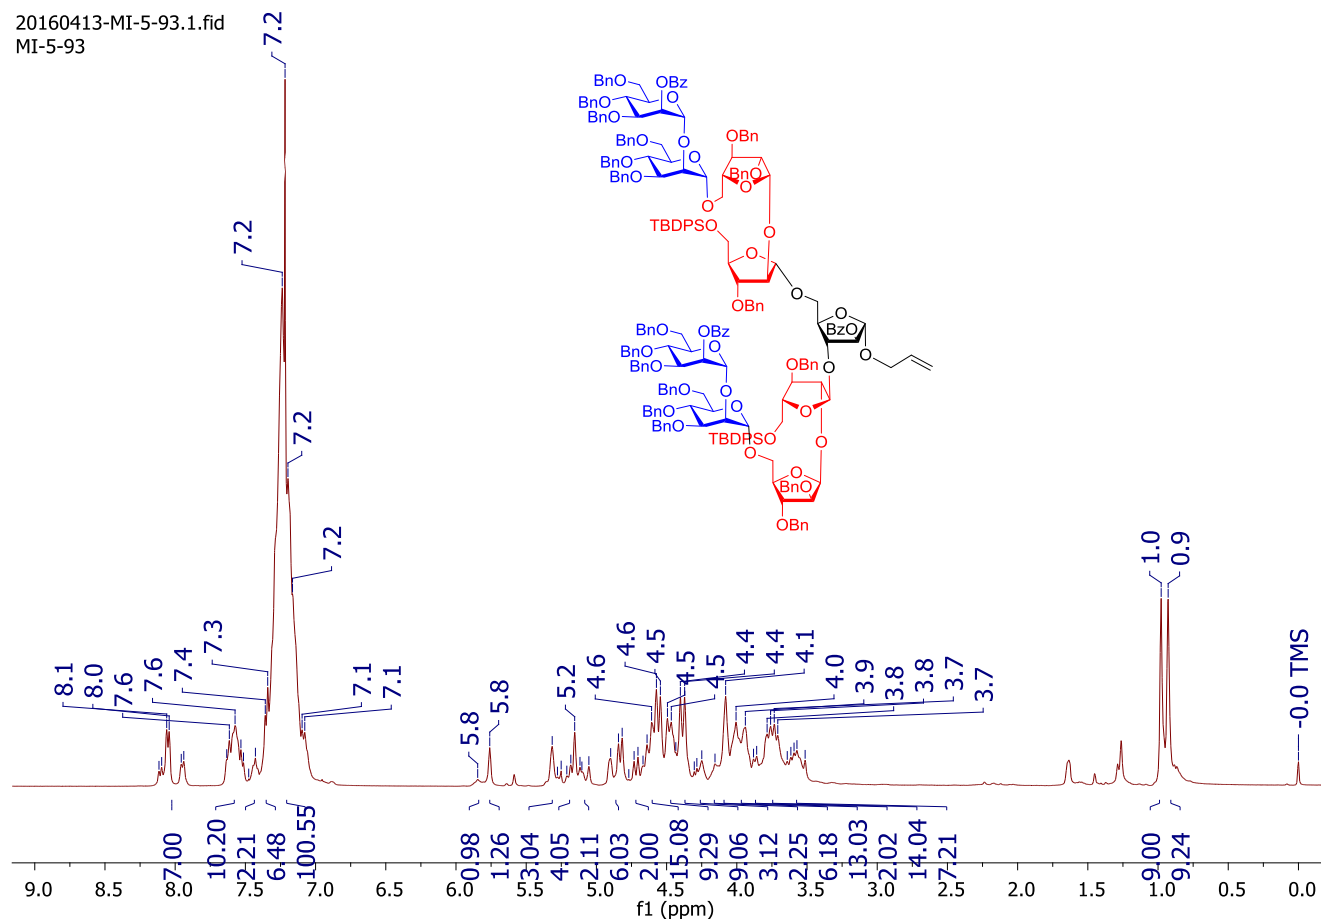

<sup>13</sup>C NMR Spectrum (100.53 MHz, CDCl<sub>3</sub>) of Compound **41**

20160416-MI-5-93.1.fid  
MI-5-93

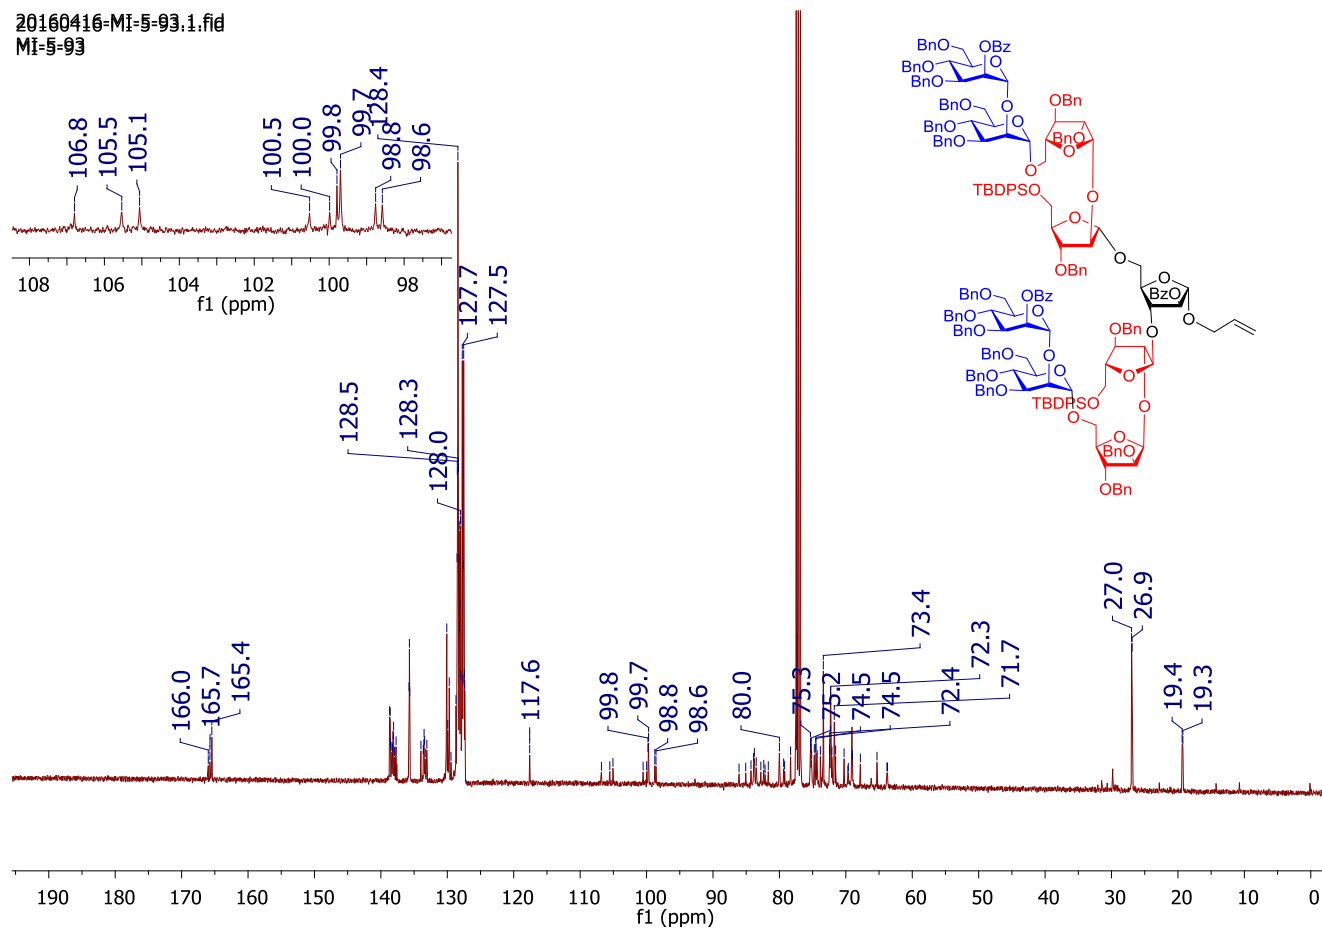

# DEPT Spectrum (100.53 MHz, CDCl<sub>3</sub>) of Compound 41

20160413-MI-5-93.3.fid  
MI-5-93

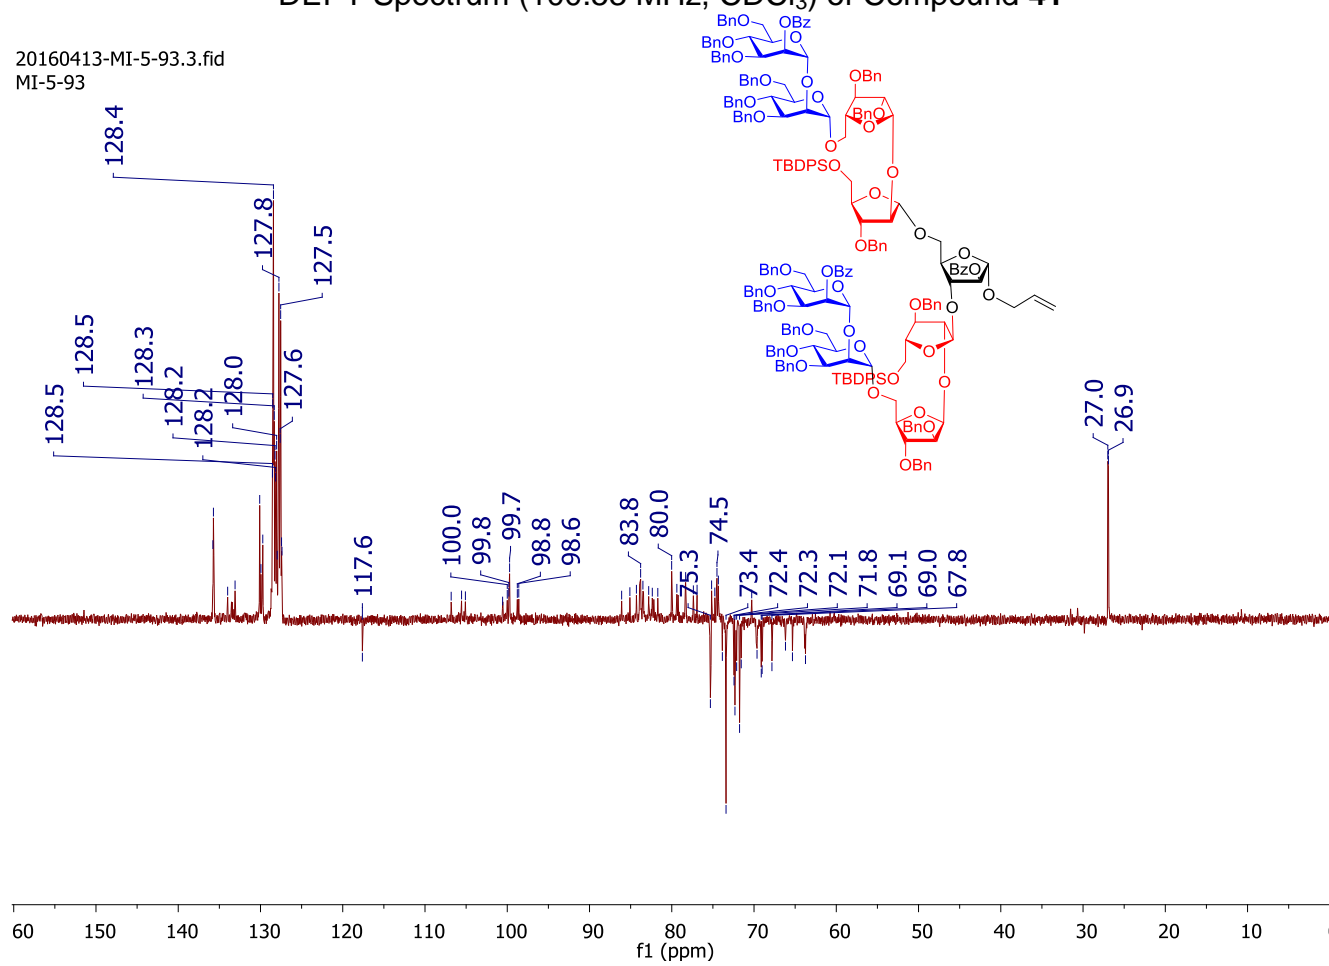

$^1\text{H}$ - $^1\text{H}$  COSY Spectrum (399.78 MHz,  $\text{CDCl}_3$ ) of Compound **41**

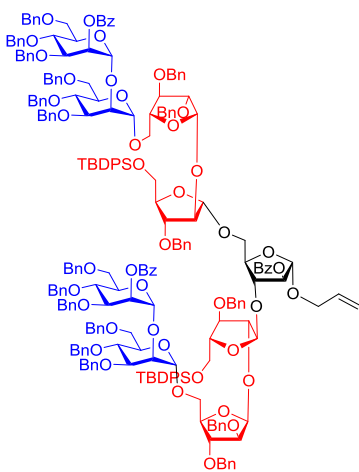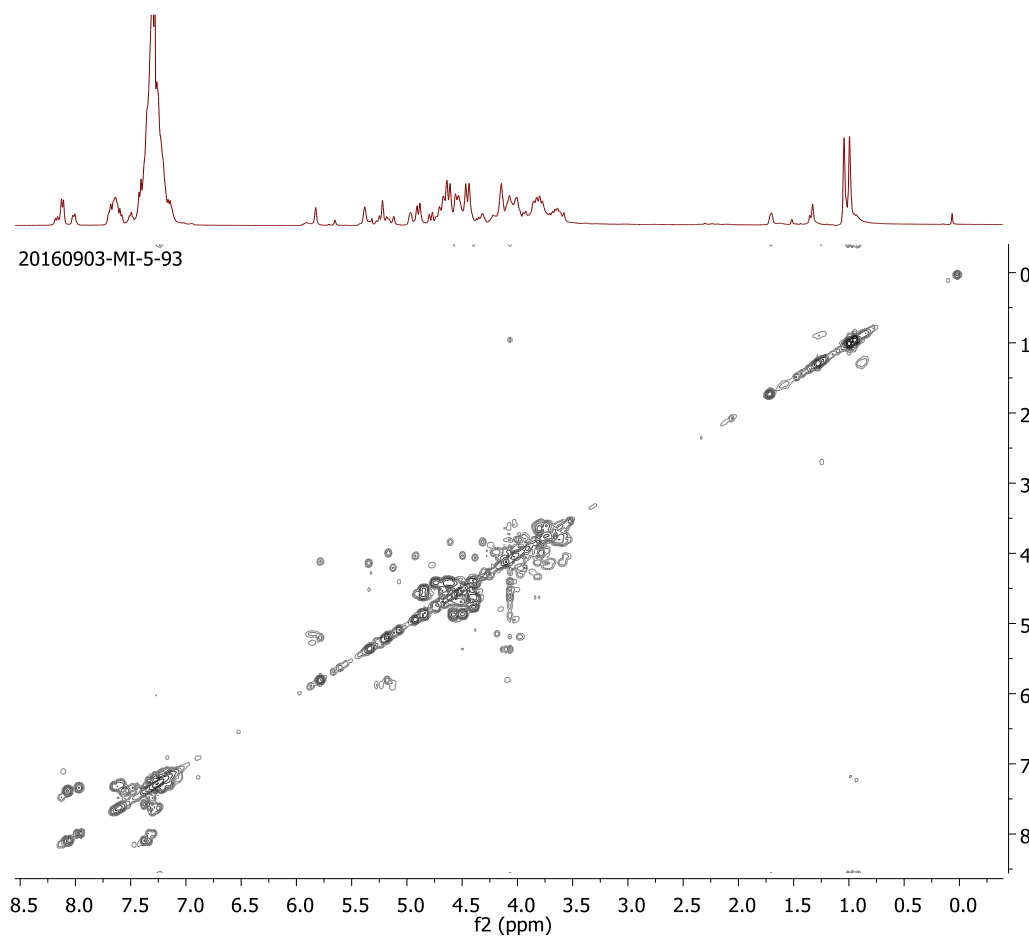



$^1\text{H}$ - $^{13}\text{C}$  HMBC Spectrum (399.78/100.53 MHz,  $\text{CDCl}_3$ ) of Compound **41**

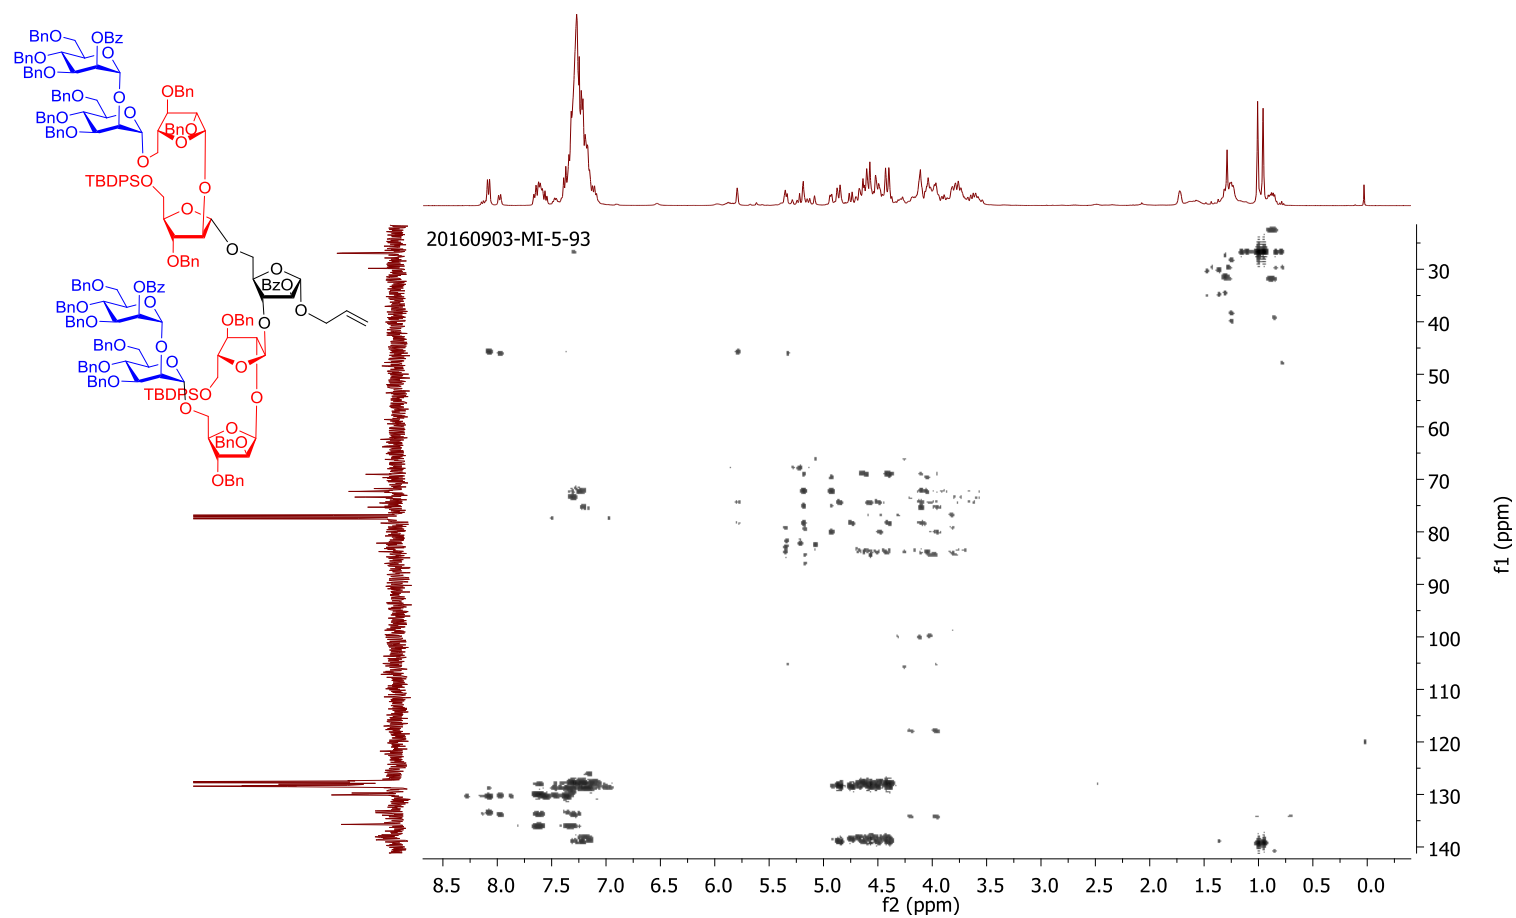

gHSQC Spectrum (399.78/100.53 MHz, CDCl<sub>3</sub>) of Compound 41

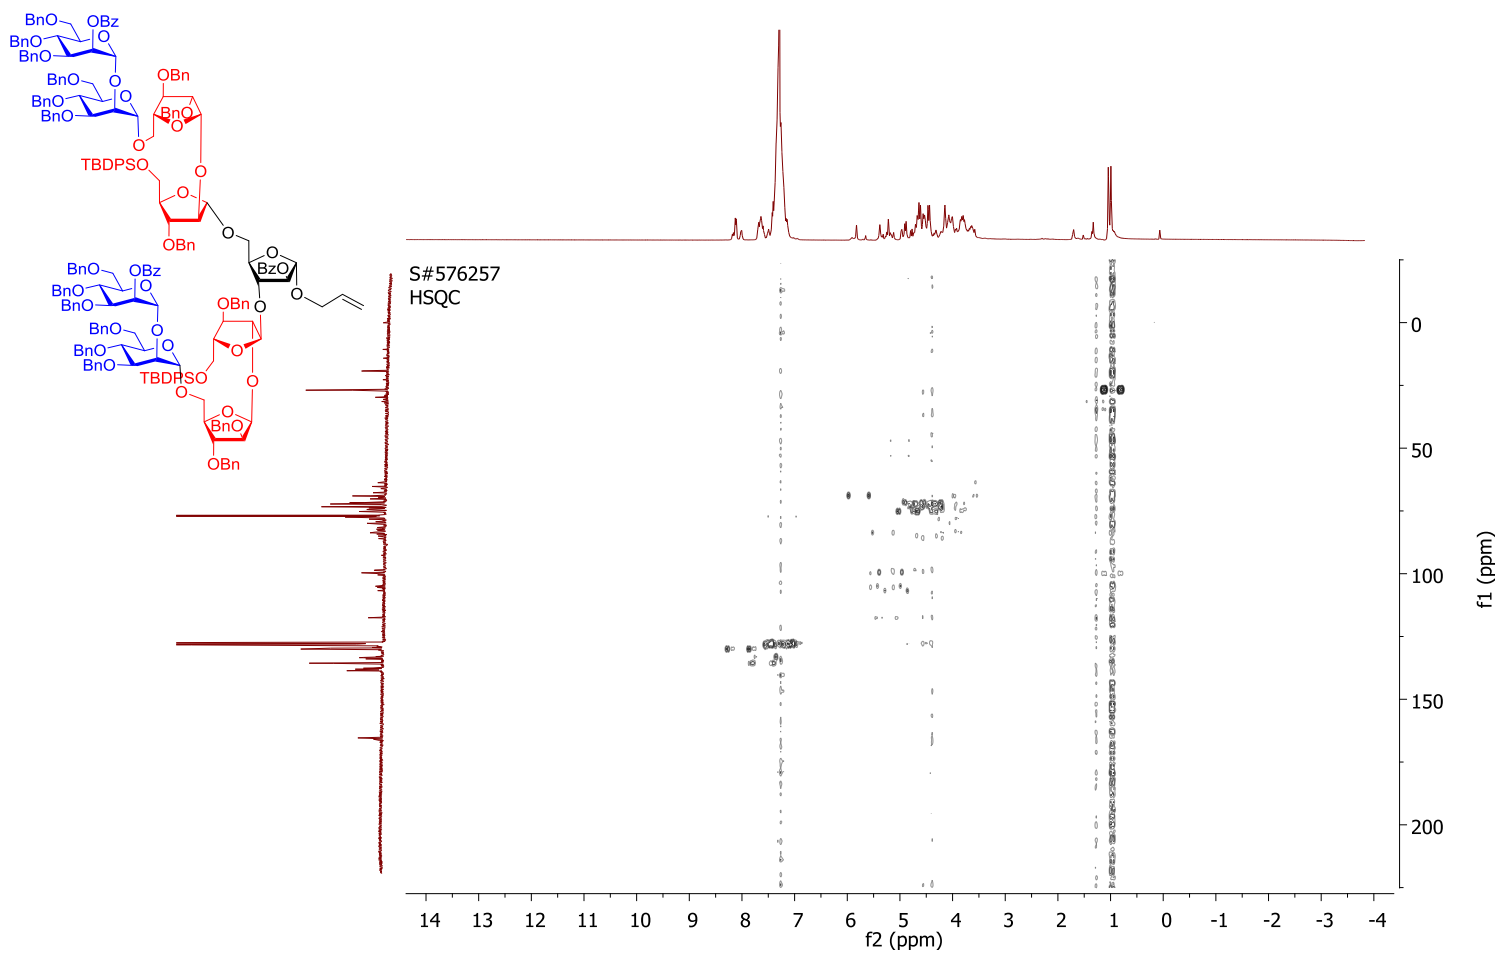

# $^1\text{H}$ NMR Spectrum (399.78 MHz, $\text{CDCl}_3$ ) of Compound **42**

20160903-MI-5-95  
MI-5-95

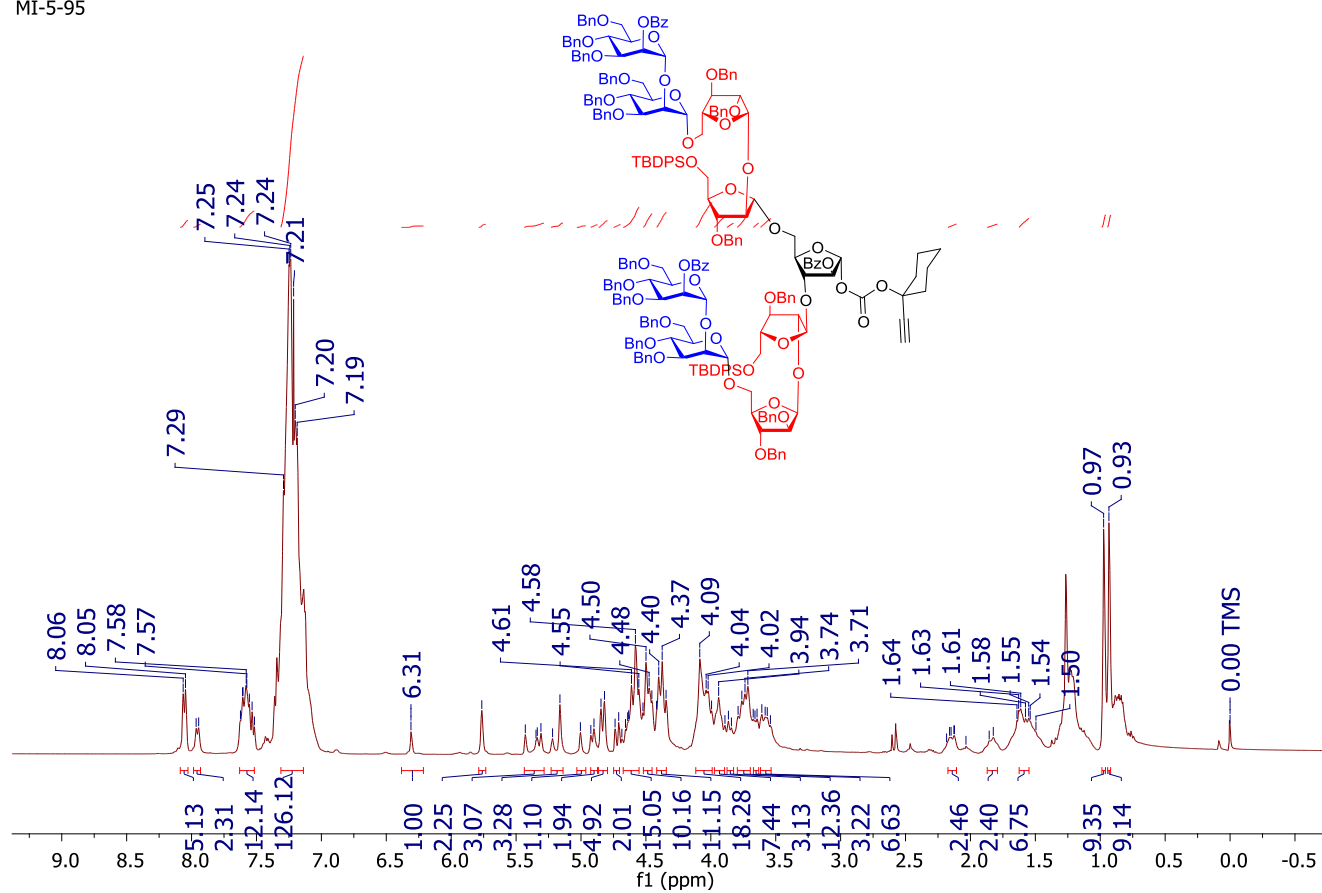

<sup>13</sup>C NMR Spectrum (100.53 MHz, CDCl<sub>3</sub>) of Compound **42**

20160903-MI-5-95  
MI-5-95

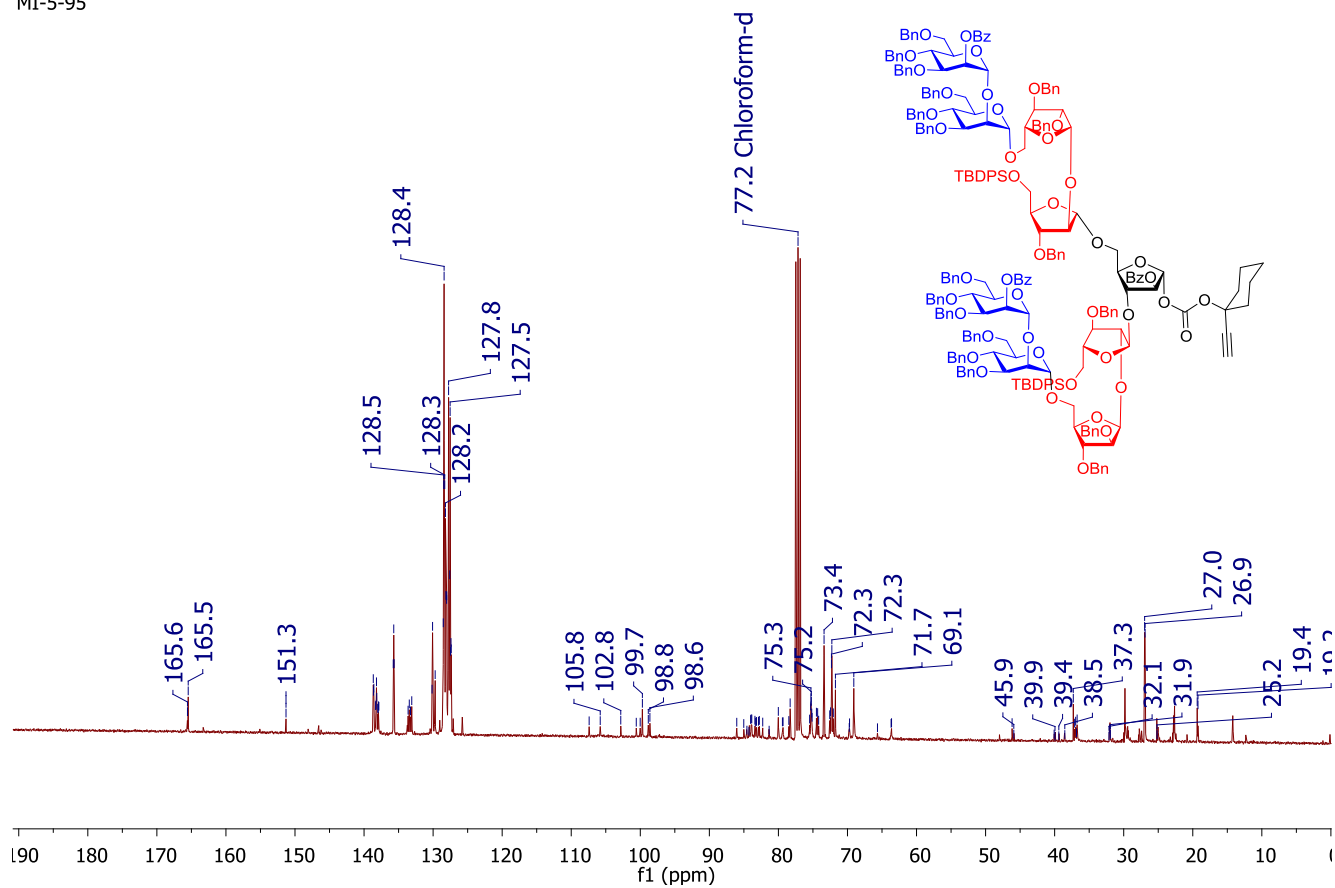

DEPT Spectrum (100.53 MHz, CDCl<sub>3</sub>) of Compound **42**

20160903-MI-5-95  
MI-5-95

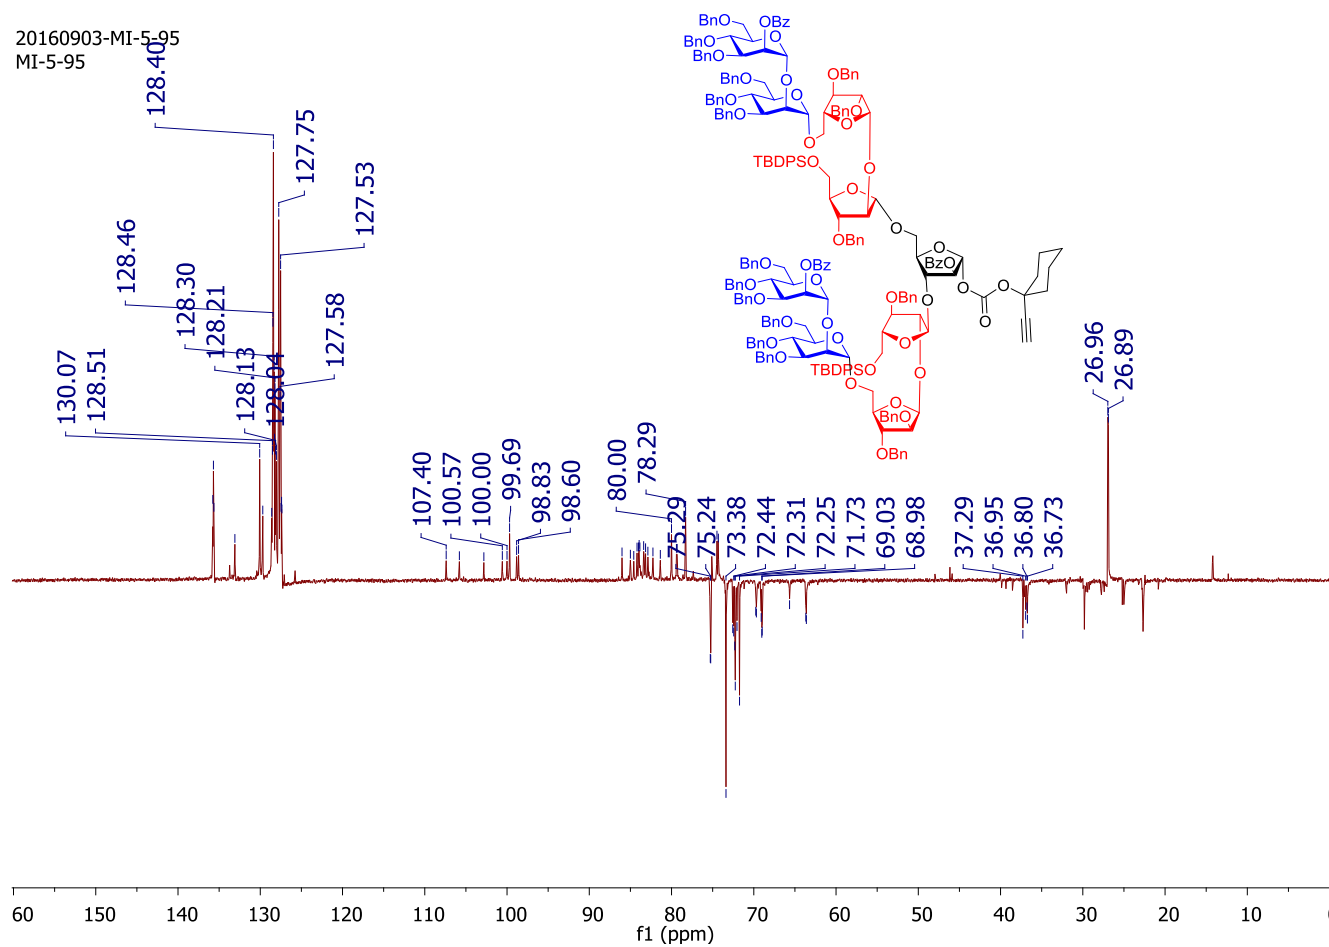

# <sup>1</sup>H NMR Spectrum (399.78 MHz, CDCl<sub>3</sub>) of Compound **43**

20160406-MI-5-86A/9  
MI-5-86A

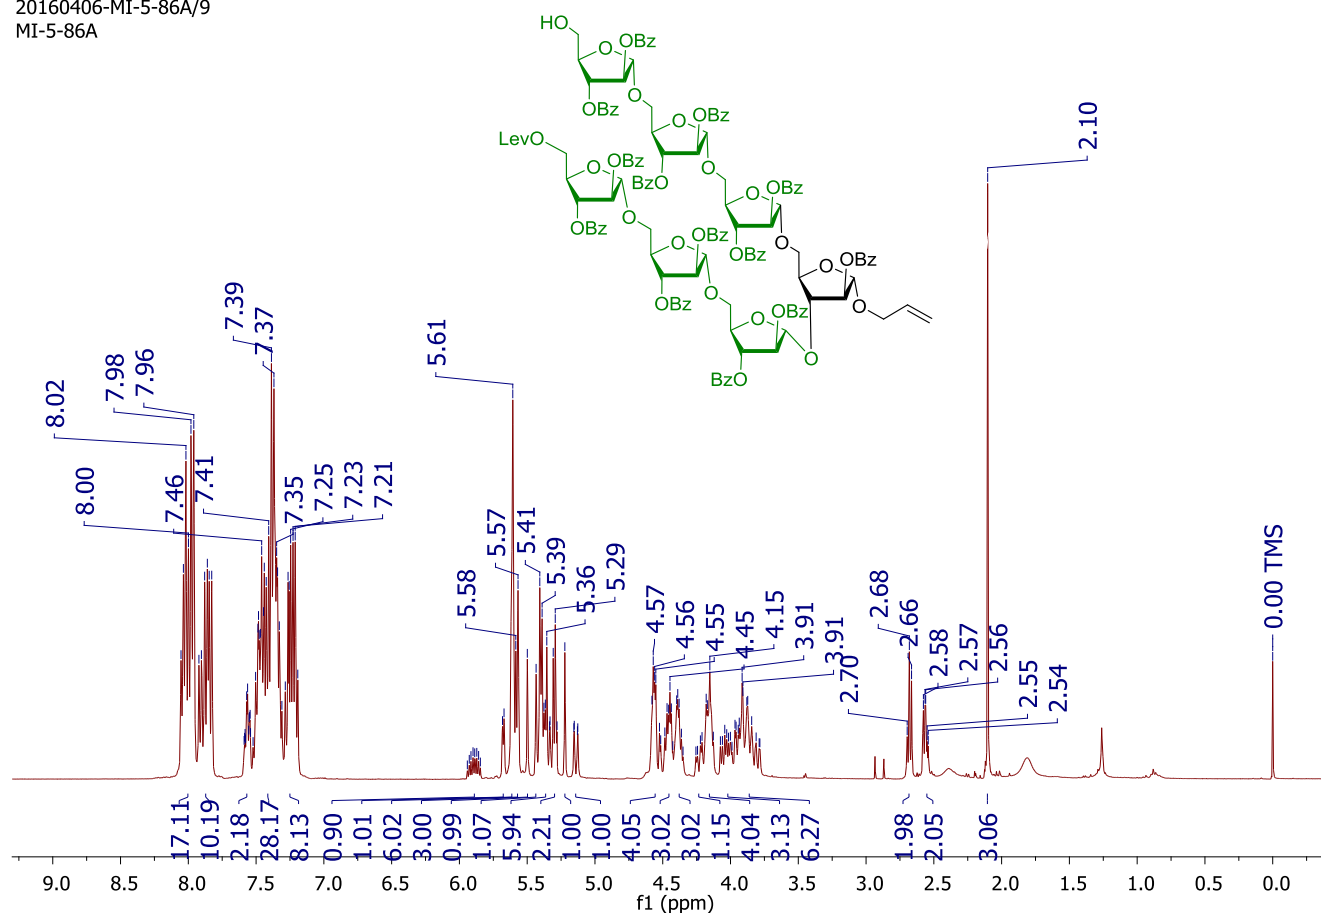

<sup>13</sup>C NMR Spectrum (100.53 MHz, CDCl<sub>3</sub>) of Compound **43**

20160406-MI-5-86A/6  
MI-5-86A

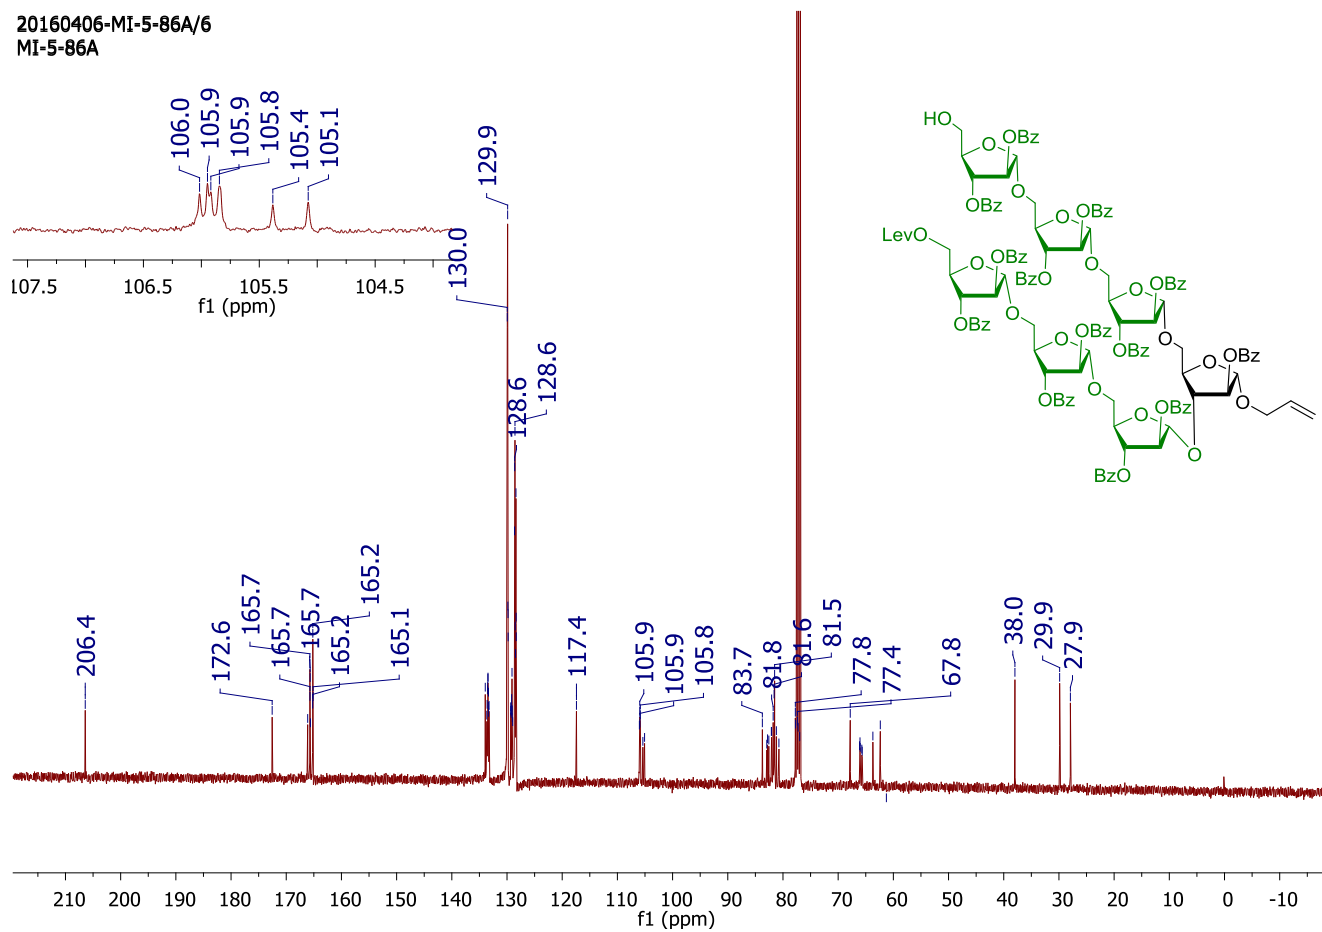

DEPT Spectrum (100.53 MHz, CDCl<sub>3</sub>) of Compound **43**

20160406-MI-5-86A/8  
MI-5-86A

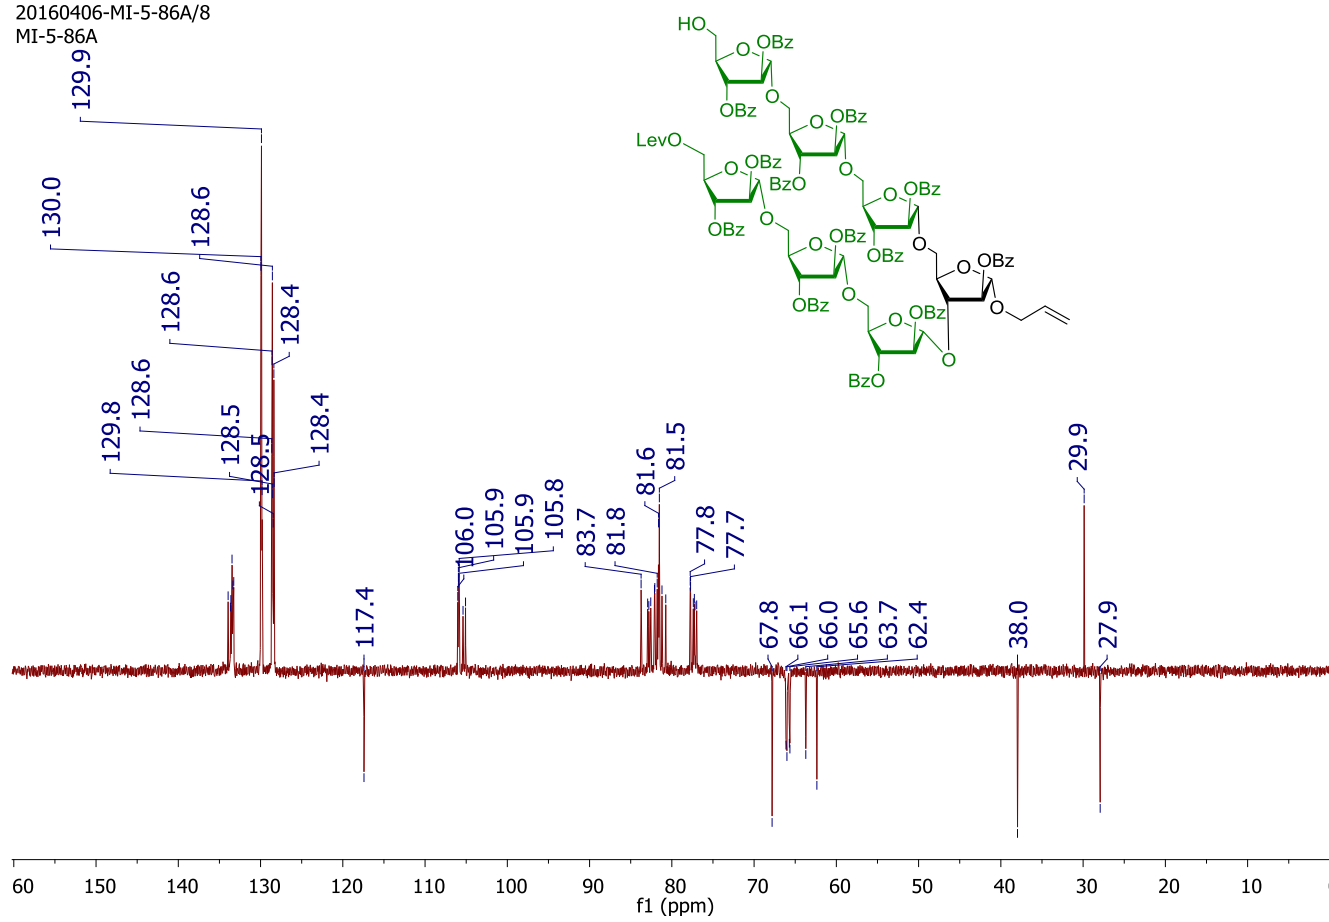



<sup>1</sup>H NMR Spectrum (399.78 MHz, CDCl<sub>3</sub>) of Compound **44**

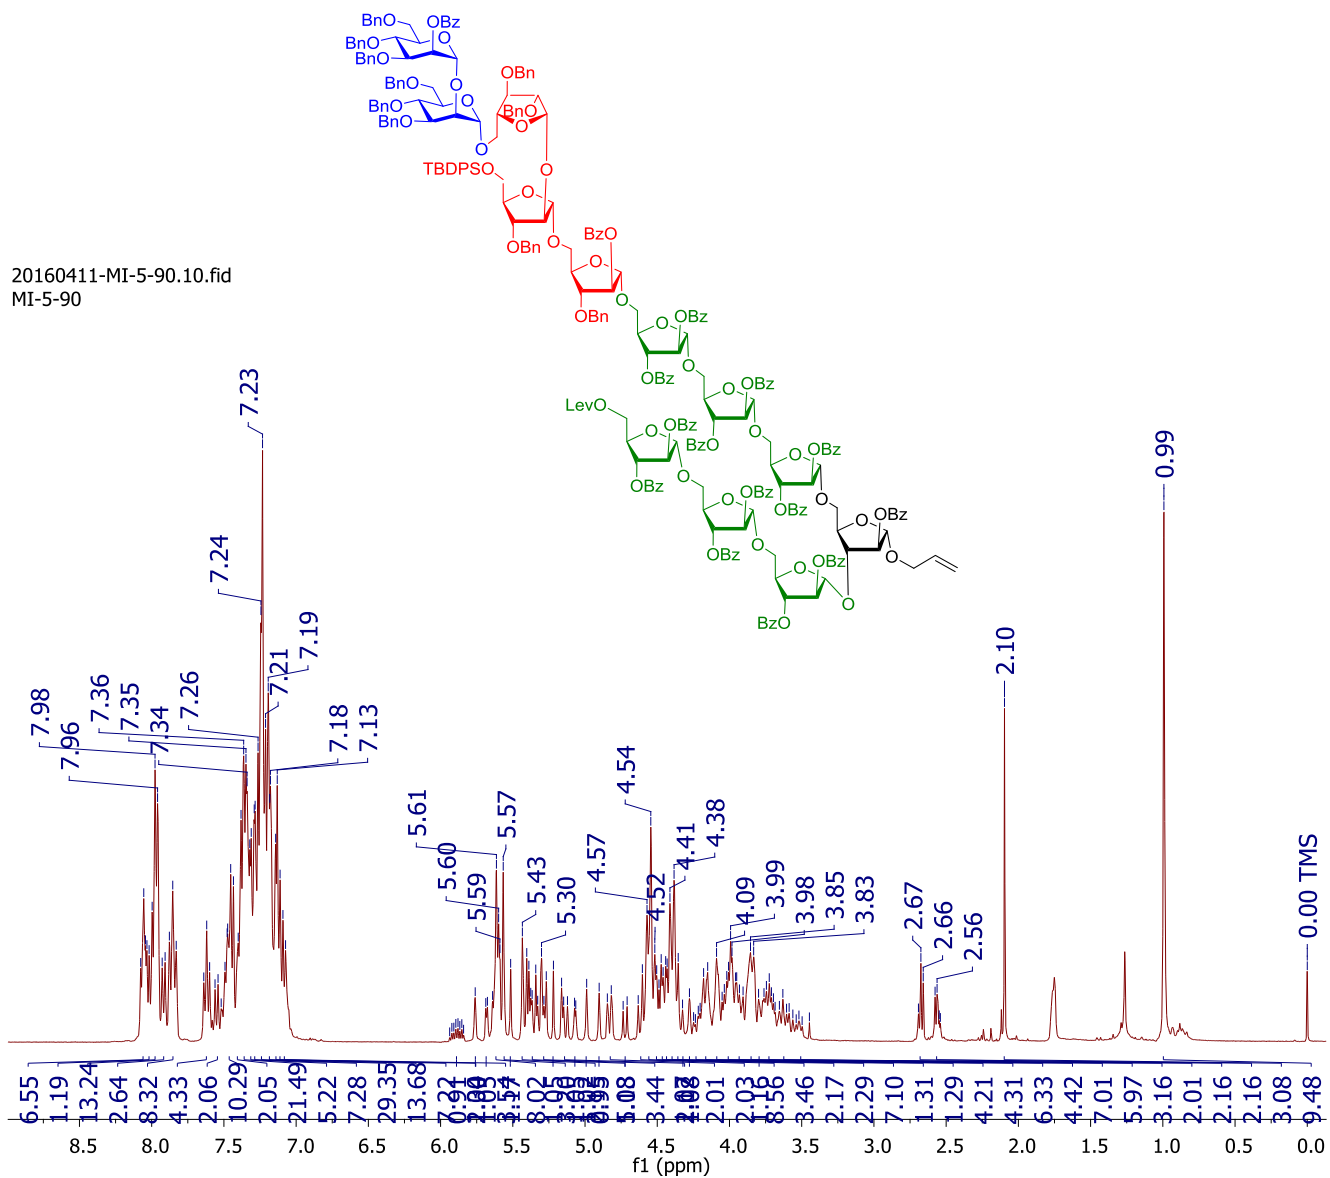

<sup>13</sup>C NMR Spectrum (100.53 MHz, CDCl<sub>3</sub>) of Compound **44**

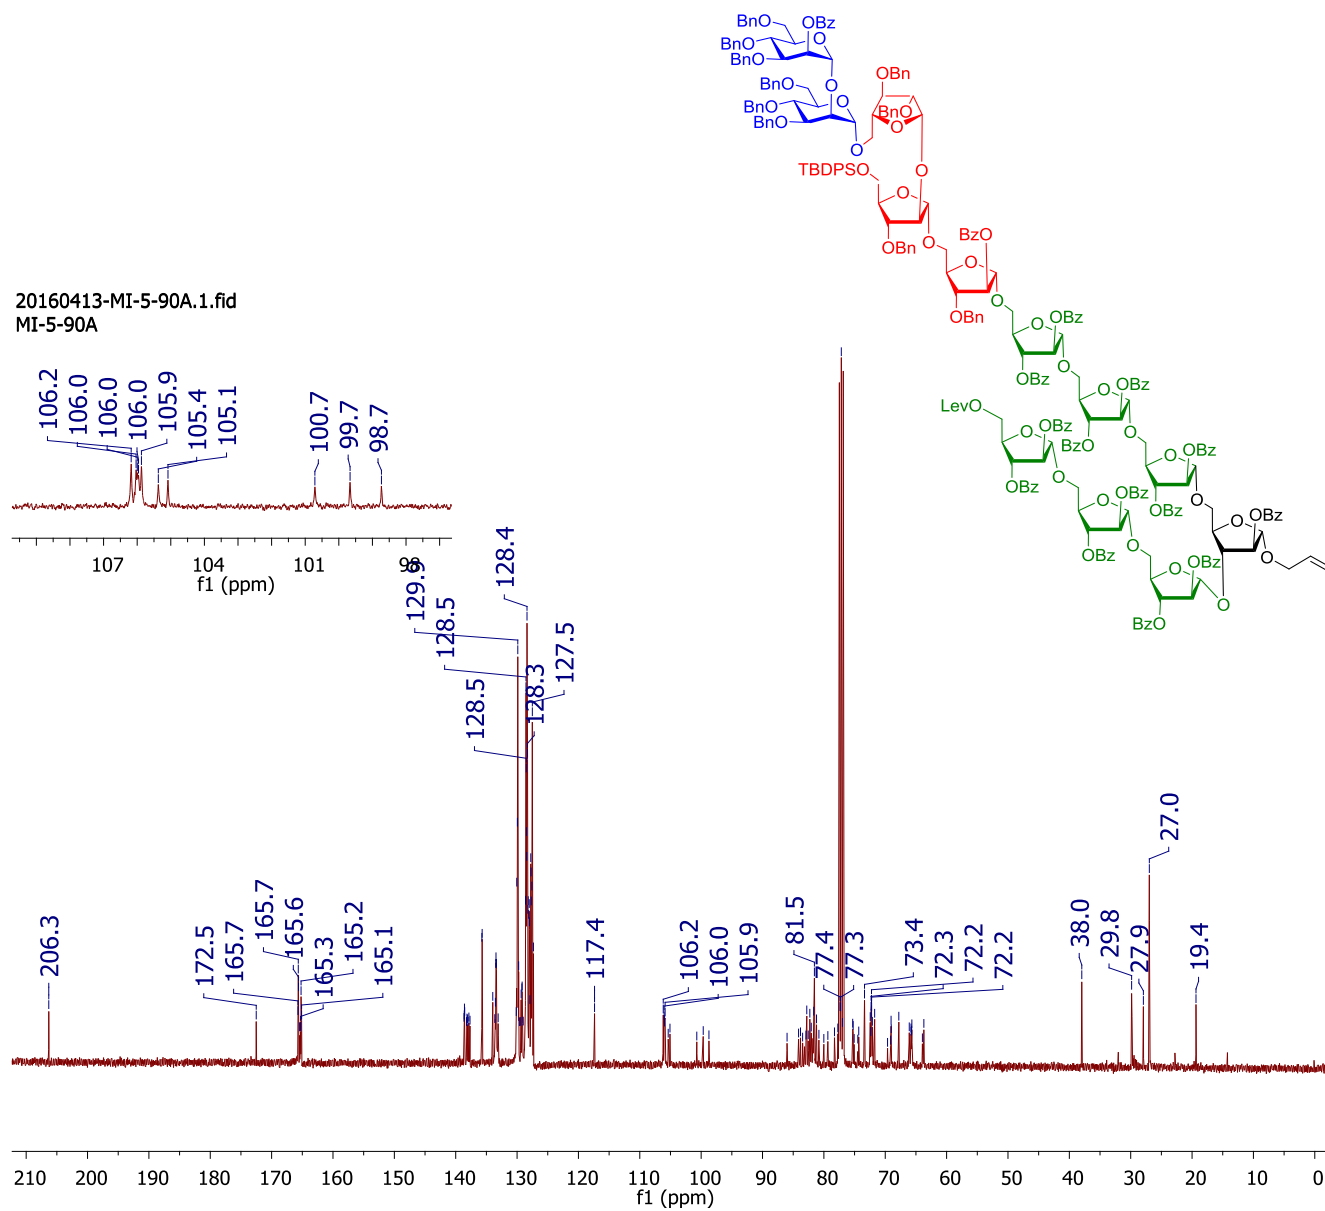

DEPT Spectrum (100.53 MHz, CDCl<sub>3</sub>) of Compound **44**

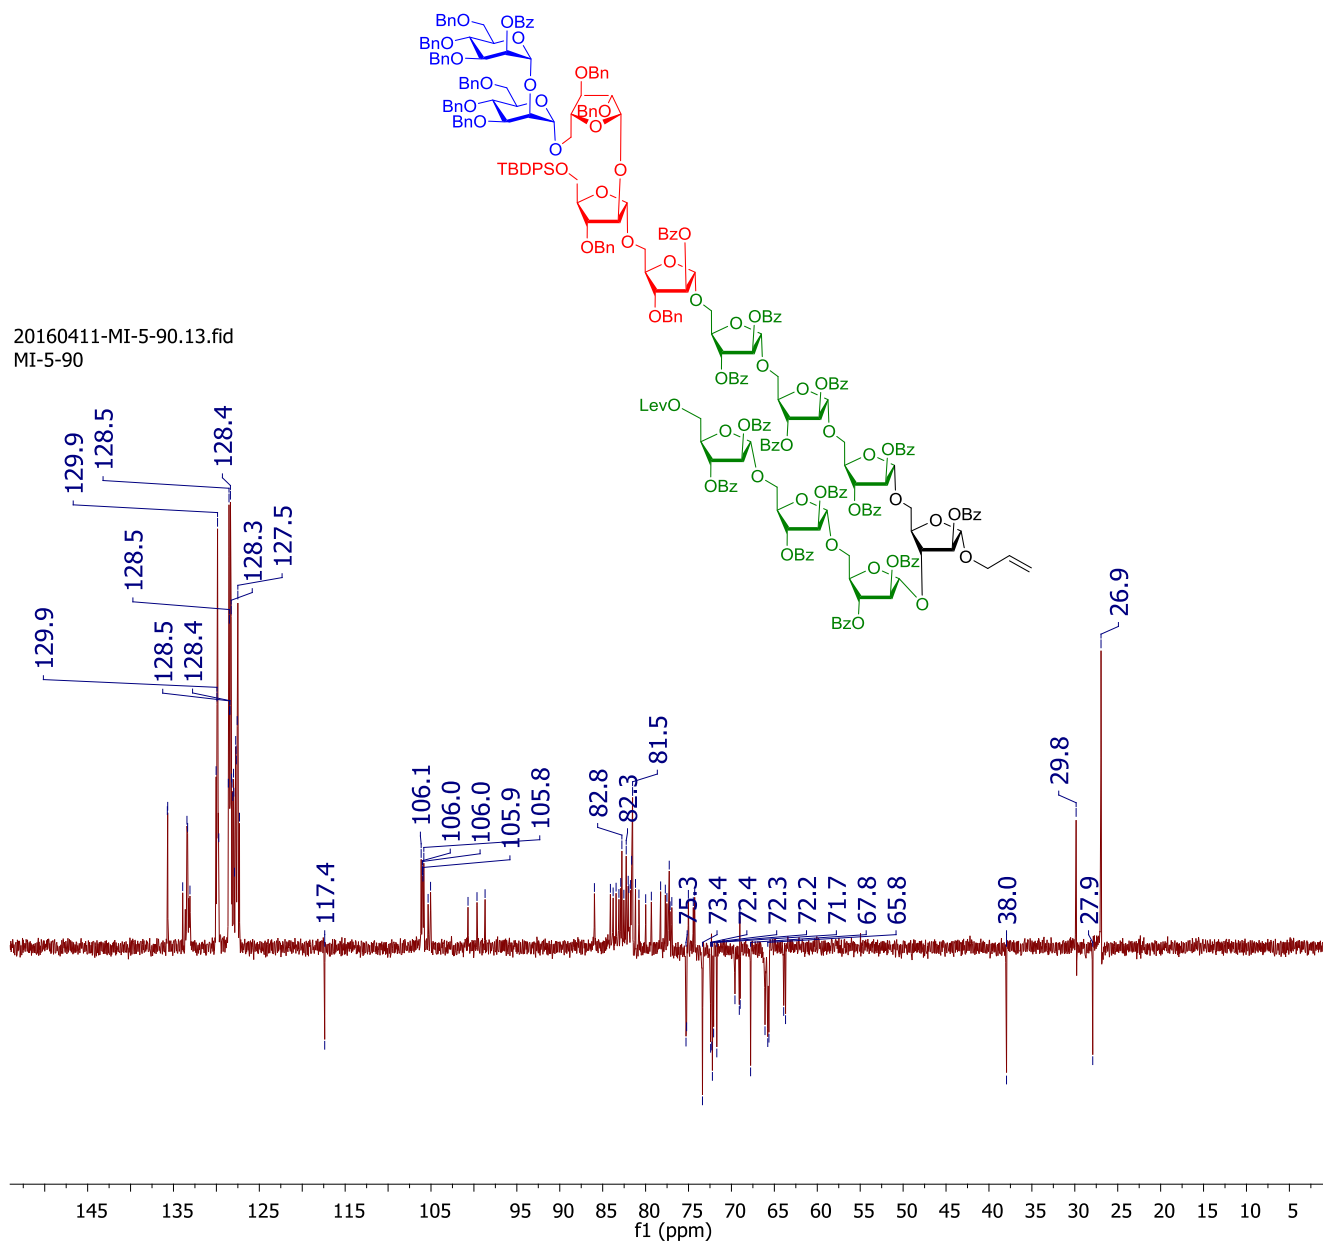

<sup>1</sup>H NMR Spectrum (399.78 MHz, CDCl<sub>3</sub>) of Compound 45

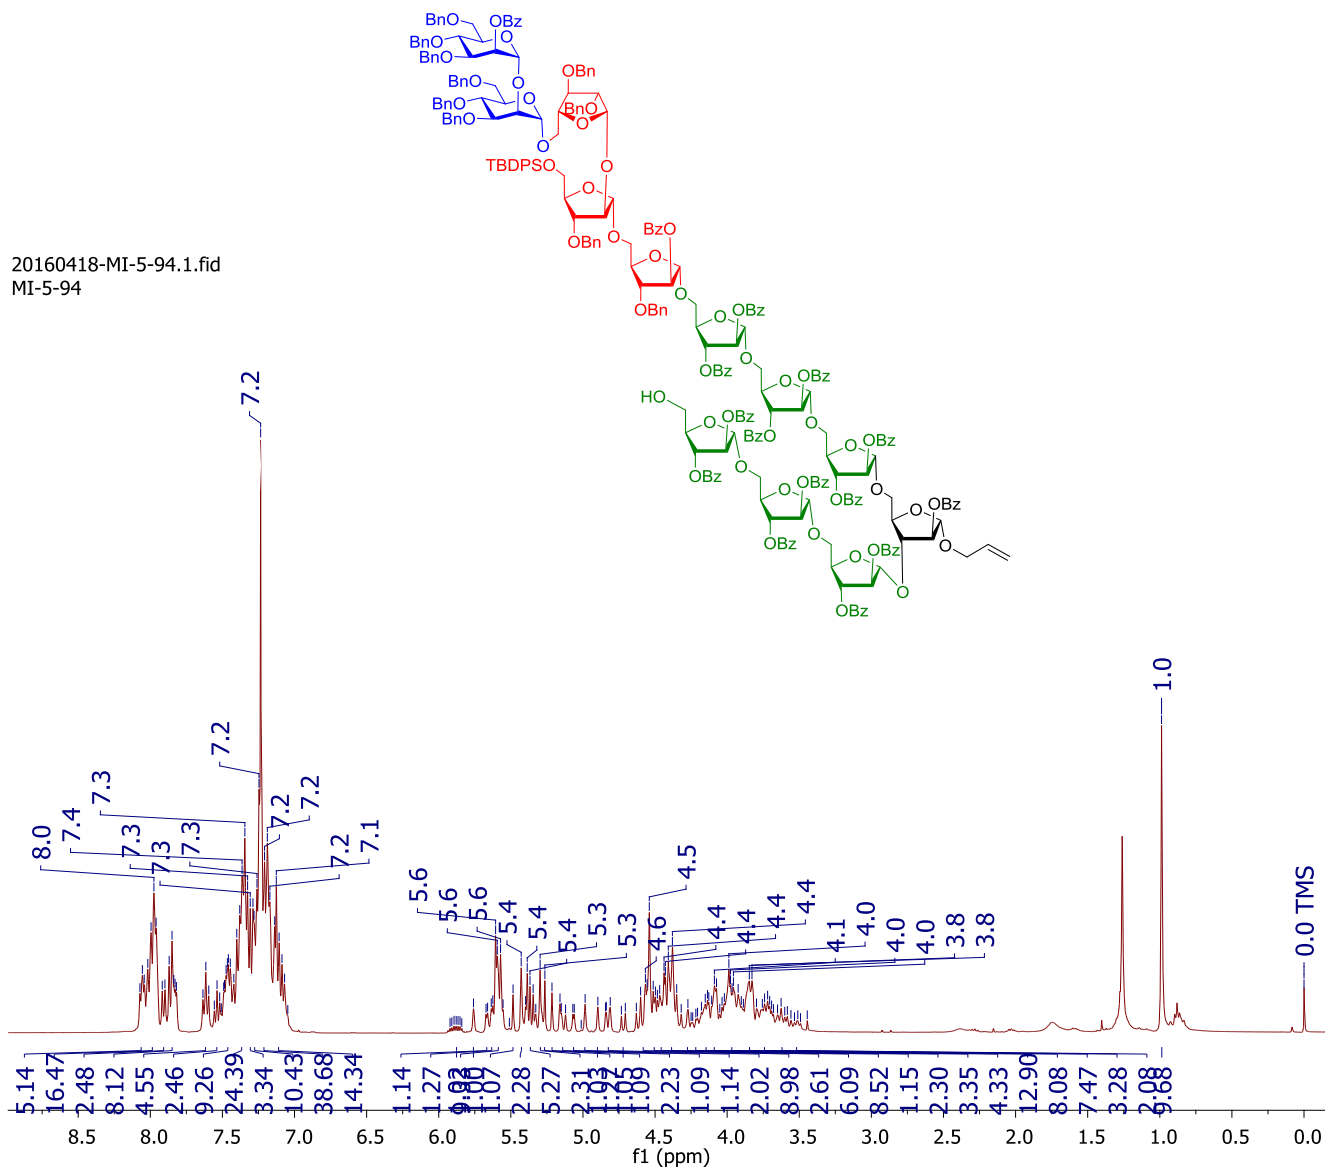

<sup>13</sup>C NMR Spectrum (100.53 MHz, CDCl<sub>3</sub>) of Compound **45**

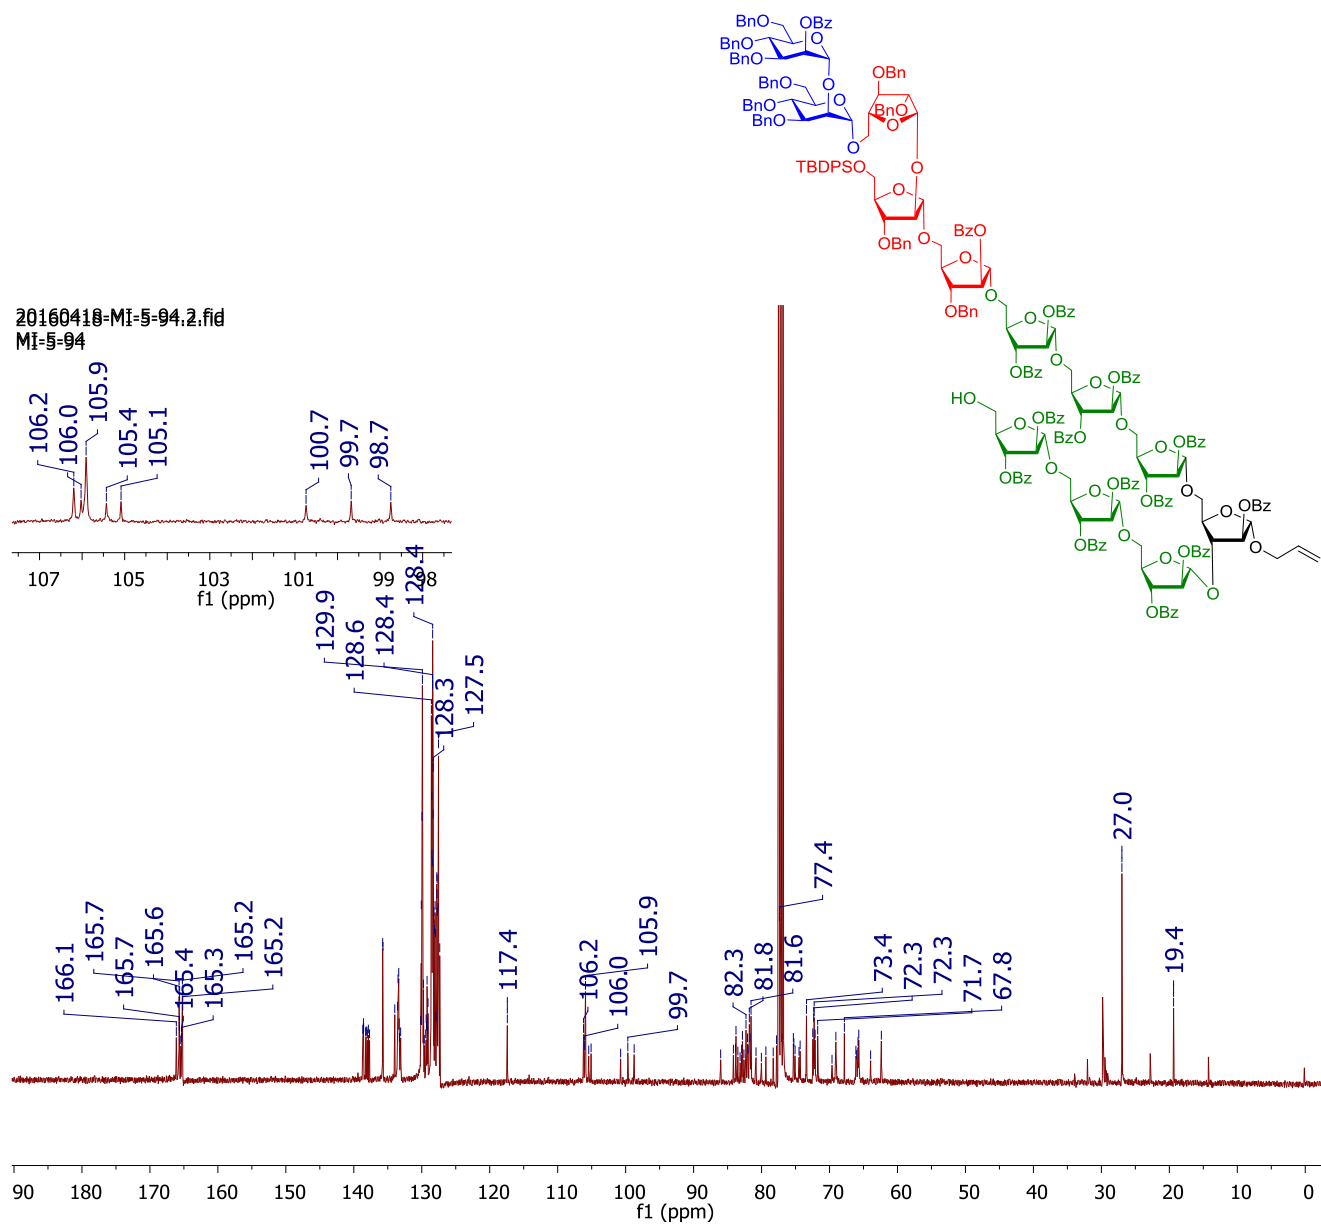

# DEPT Spectrum (100.53 MHz, CDCl<sub>3</sub>) of Compound 45

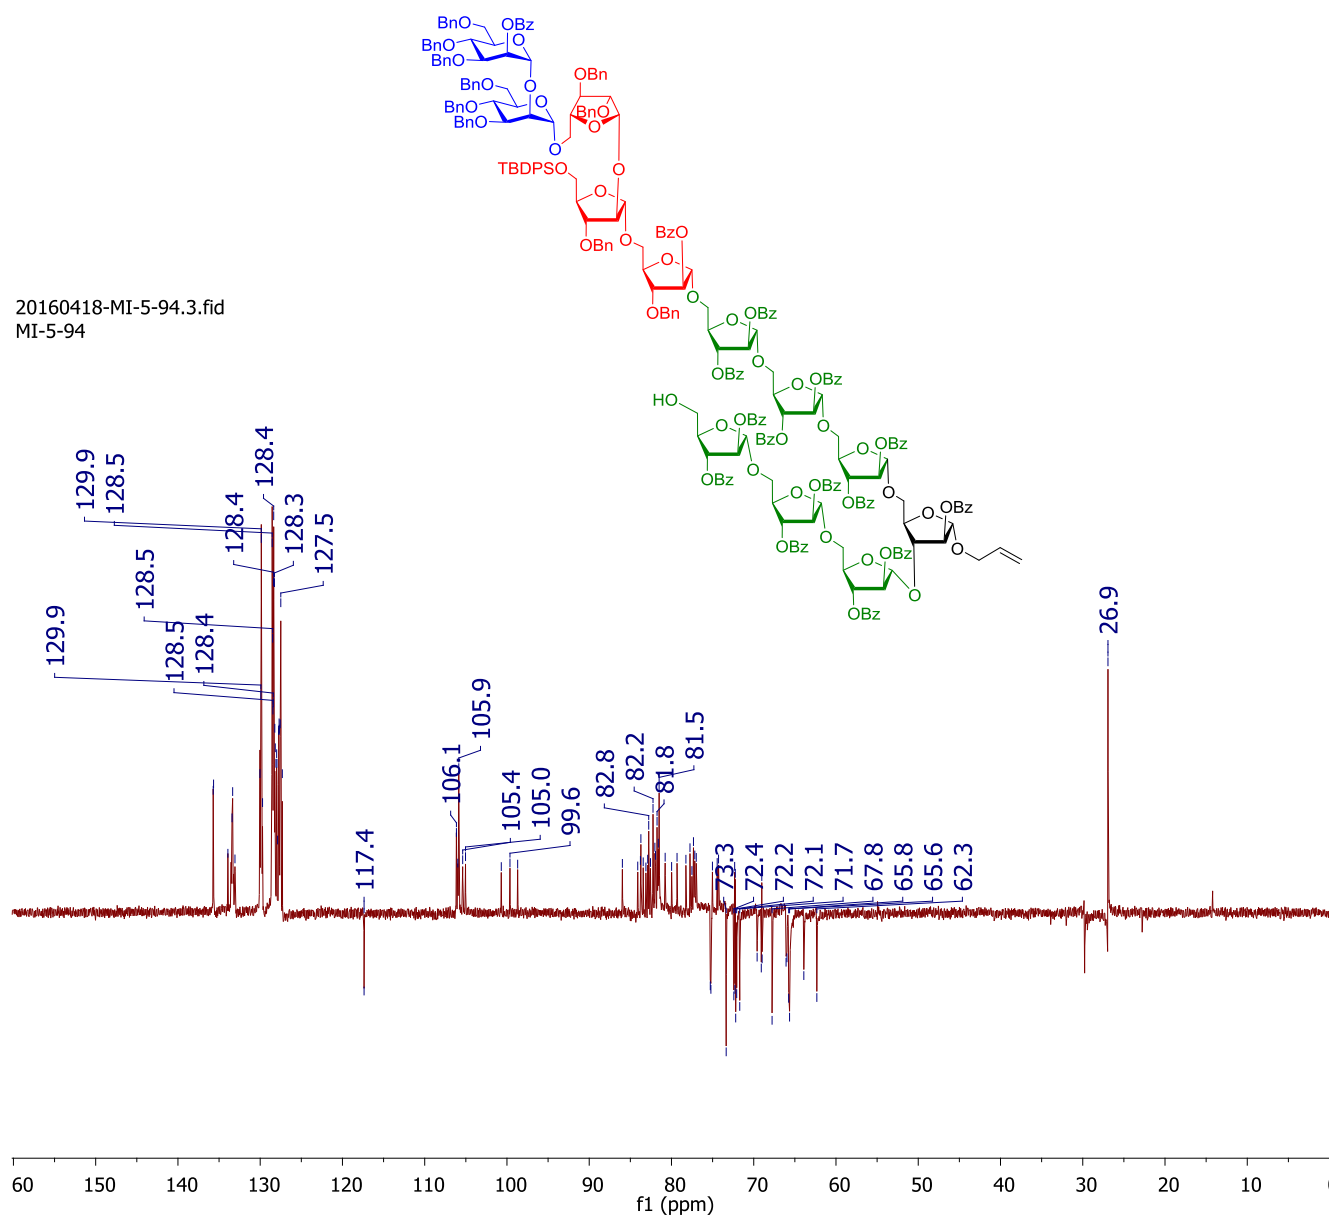

$^1\text{H}$ - $^1\text{H}$  COSY Spectrum (399.78 MHz,  $\text{CDCl}_3$ ) of Compound **45**

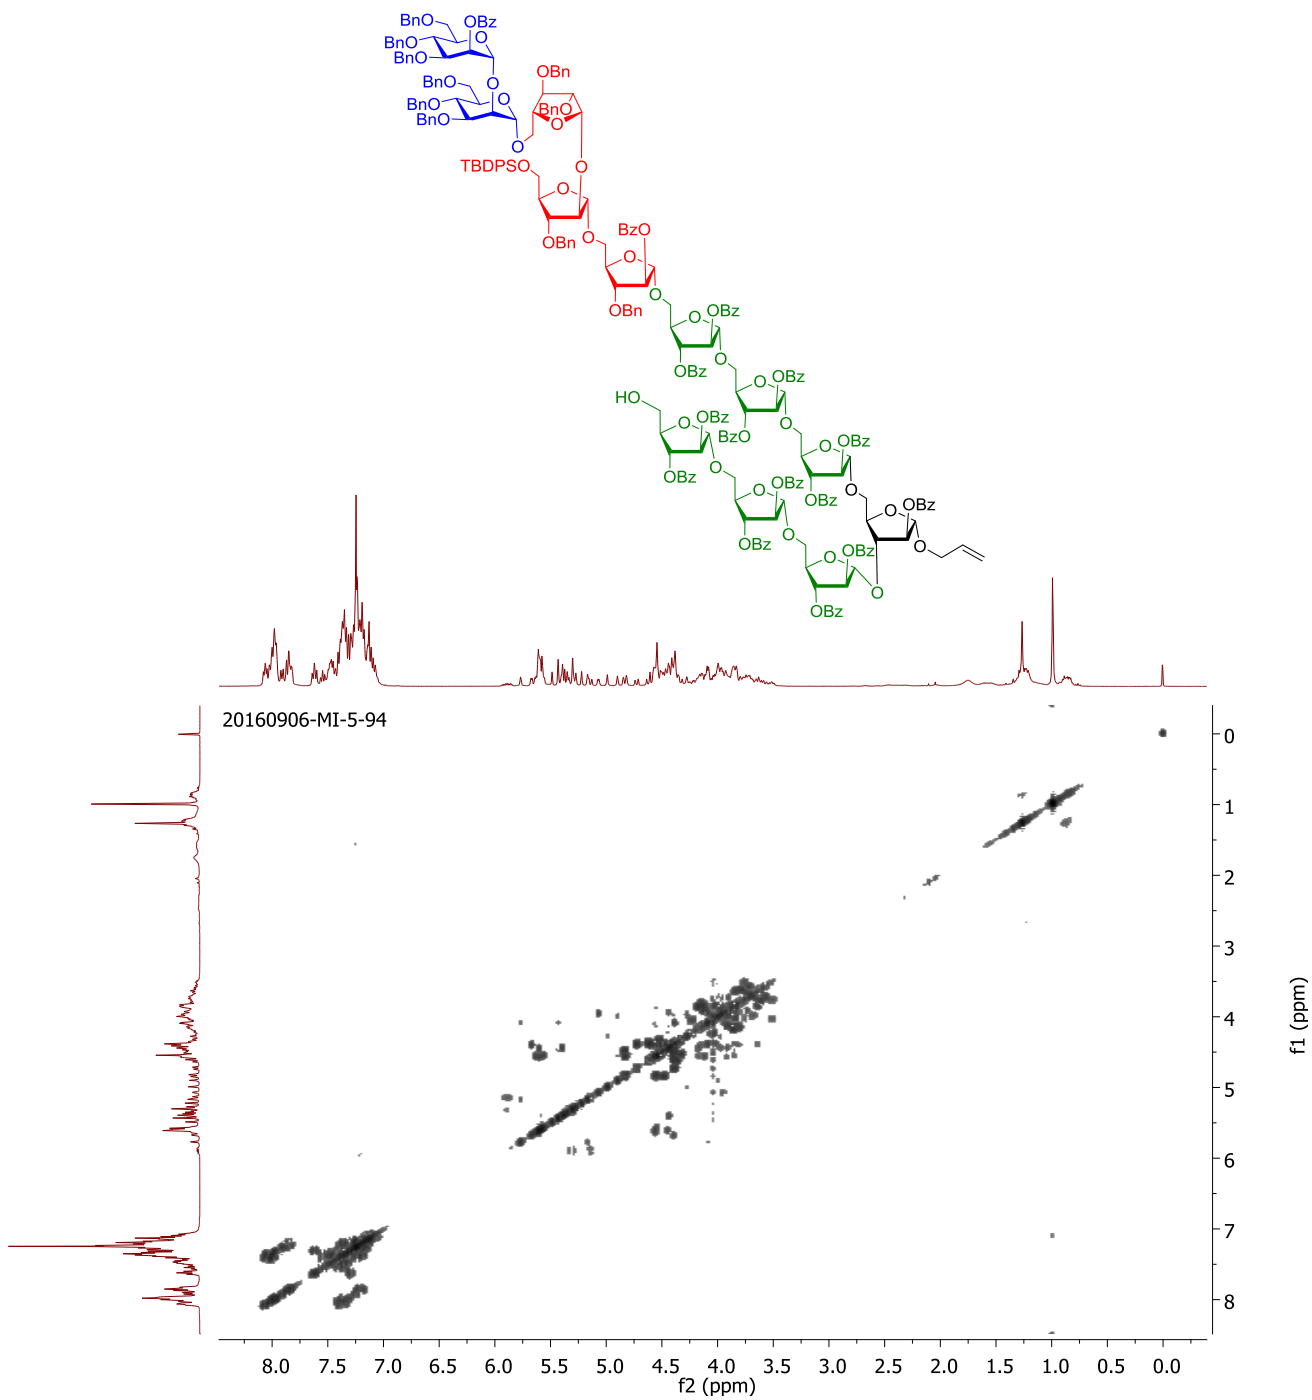





gHSQC Spectrum (600/150.99 MHz, CDCl<sub>3</sub>) of Compound **45**

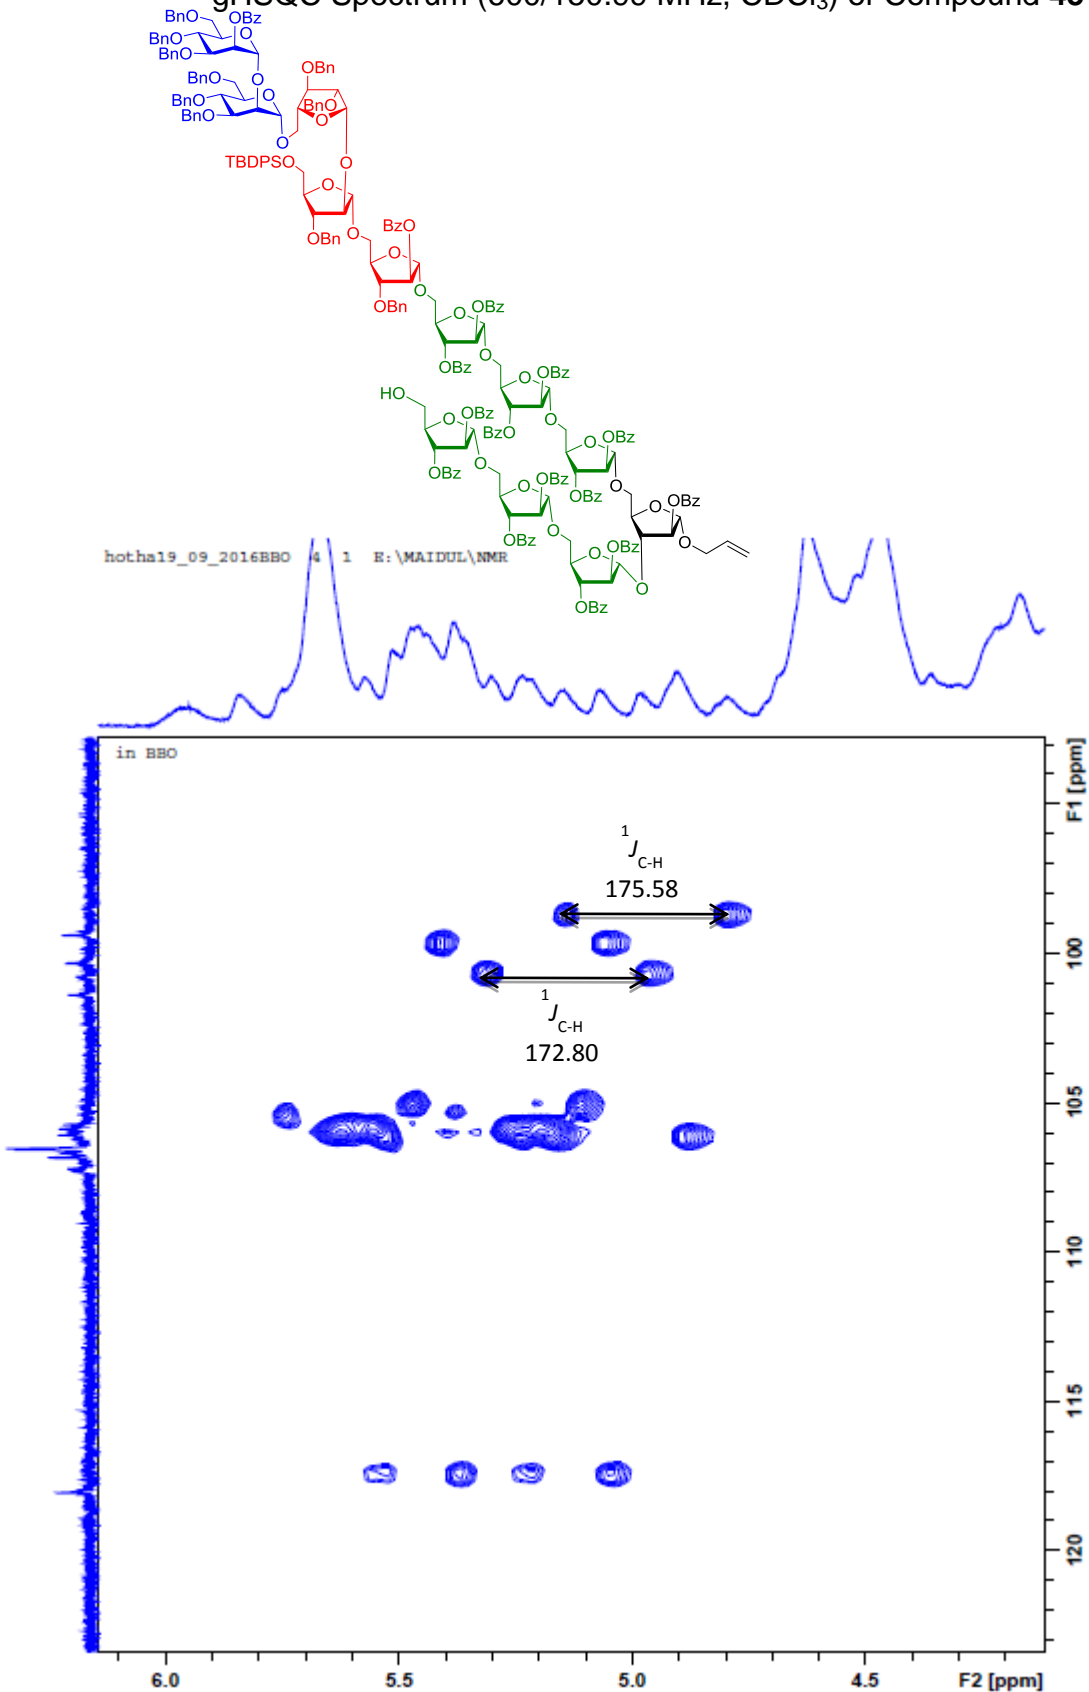

# <sup>1</sup>H NMR Spectrum (399.78 MHz, CDCl<sub>3</sub>) of Compound 46

2016-05-02-hota.1.fid  
MI-5-98 in CDCl<sub>3</sub>

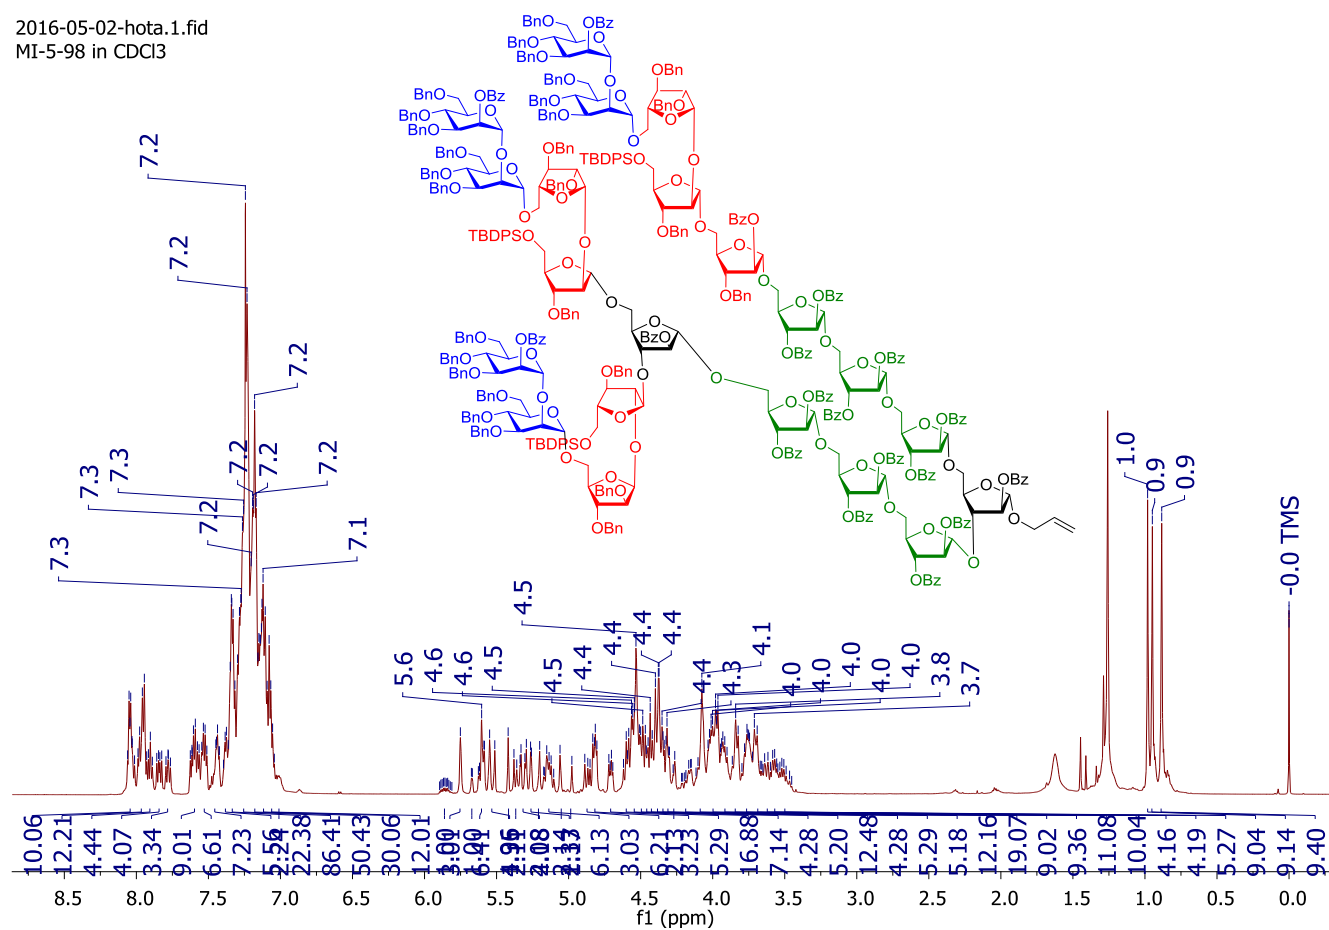

<sup>13</sup>C NMR Spectrum (100.53 MHz, CDCl<sub>3</sub>) of Compound **46**

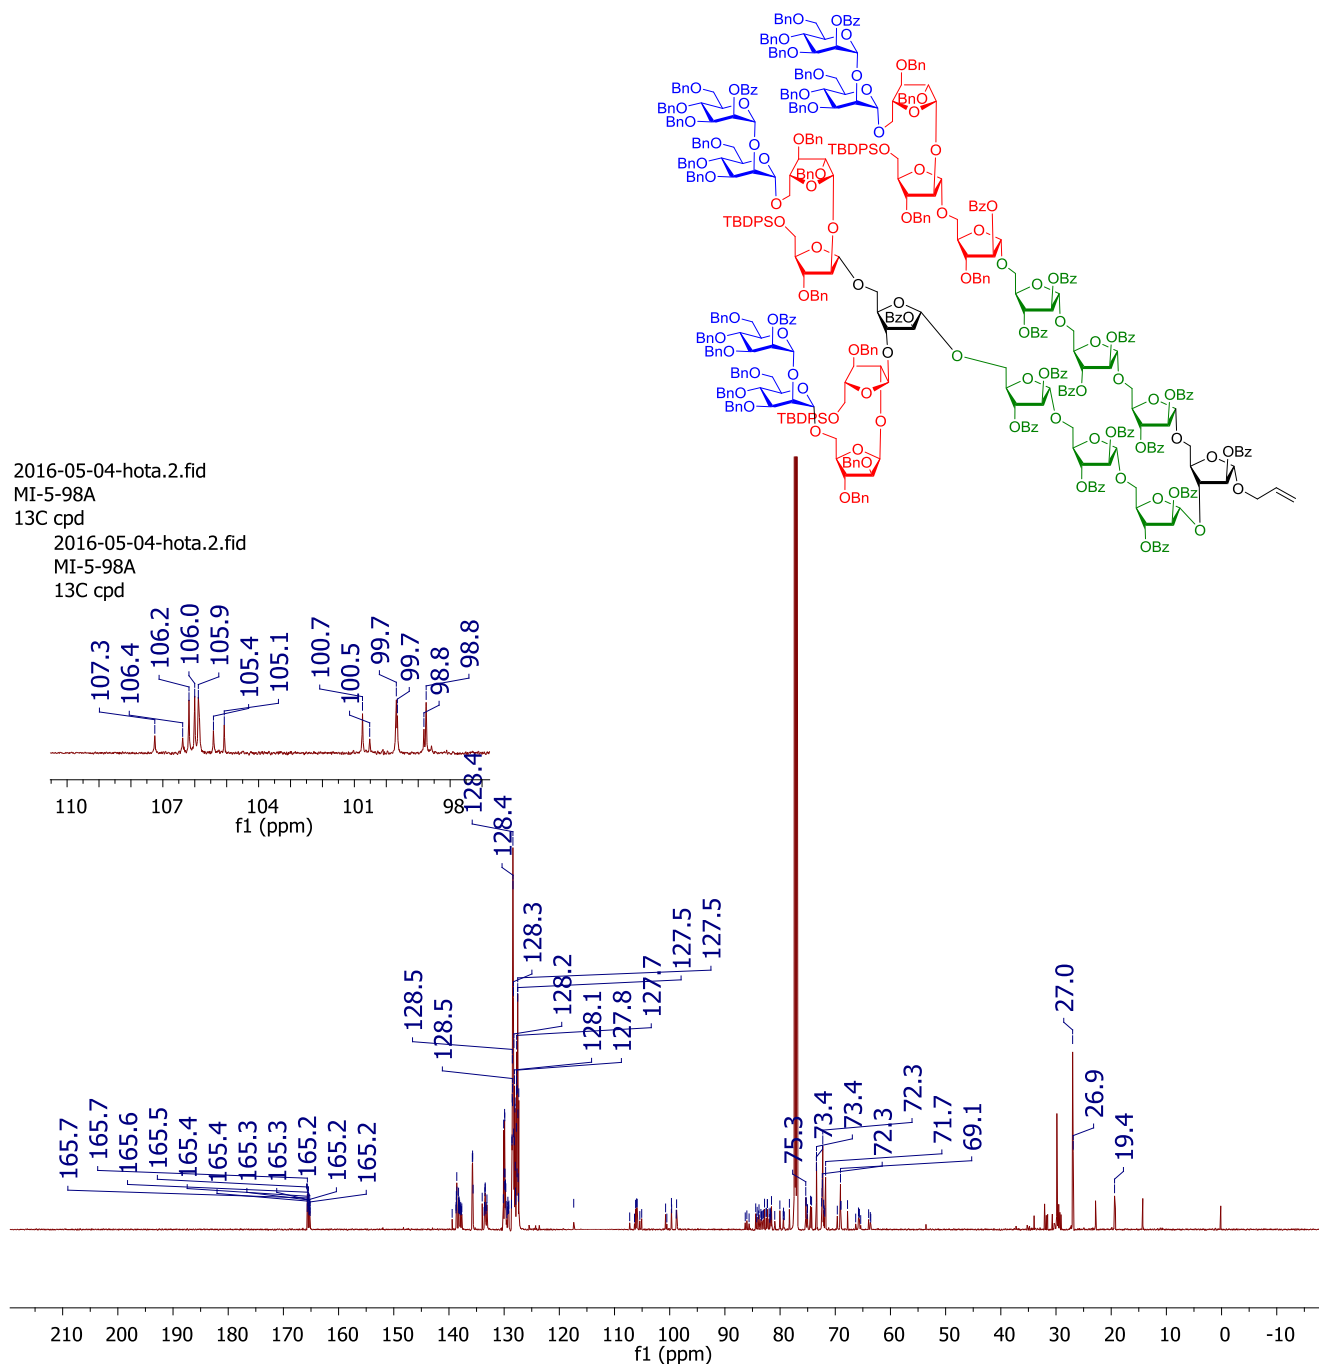

DEPT Spectrum (100.53 MHz, CDCl<sub>3</sub>) of Compound 46

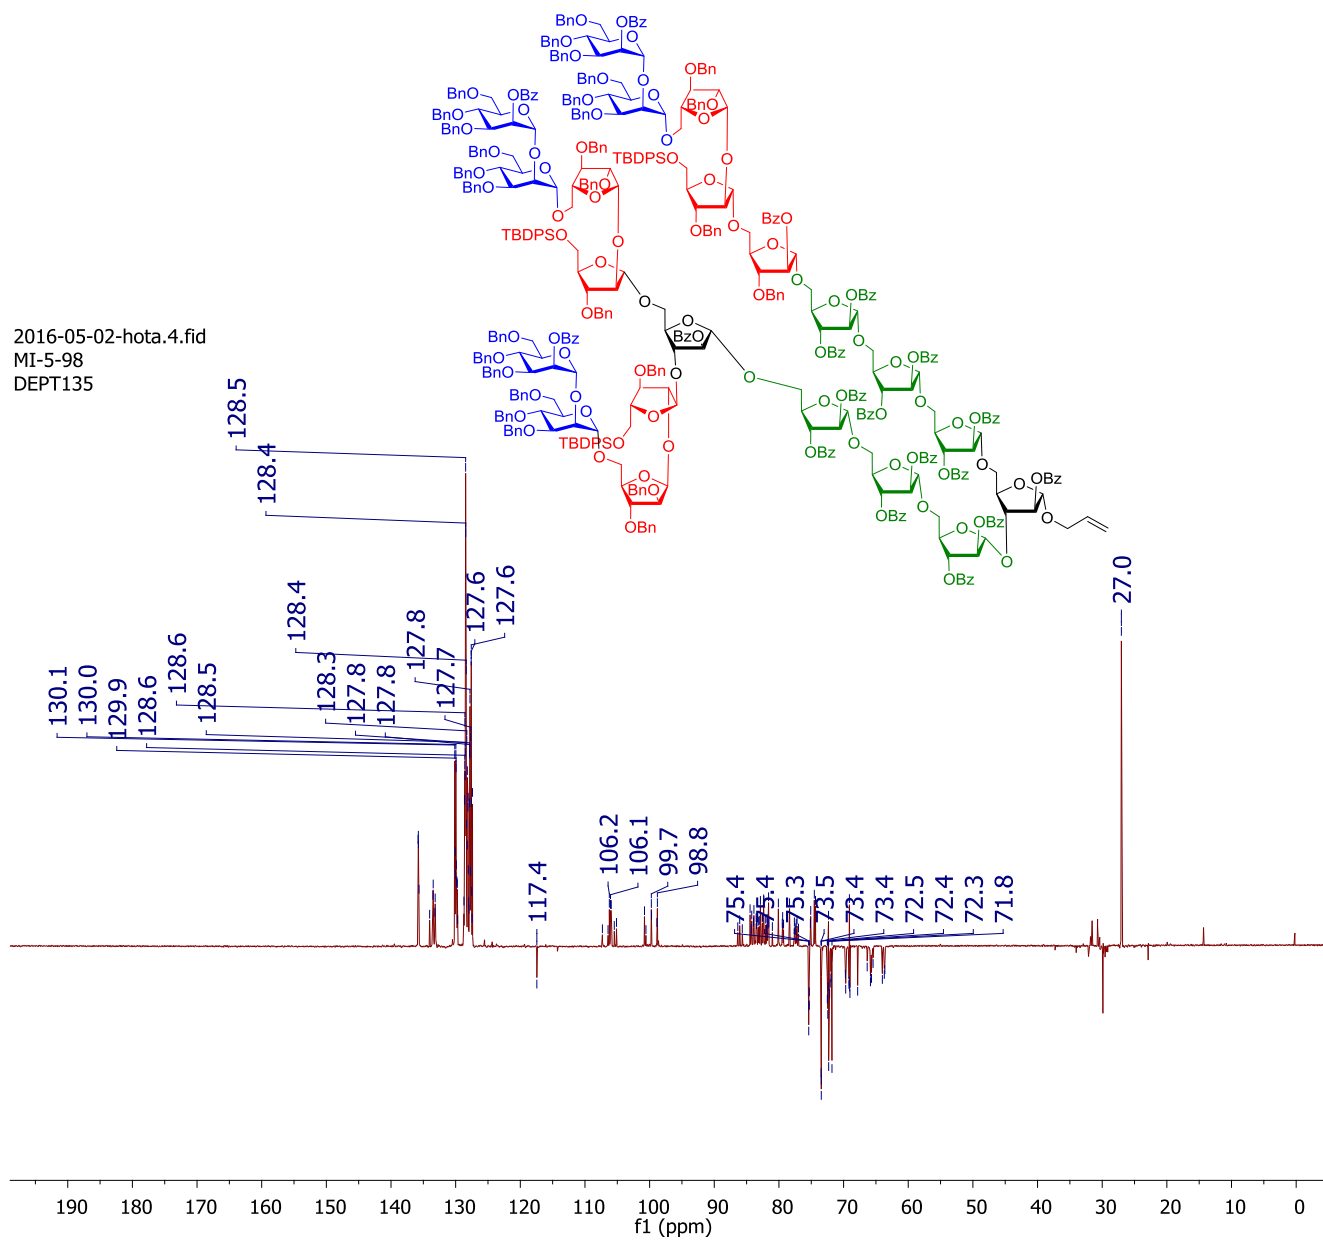

$^1\text{H}$ - $^1\text{H}$  COSY Spectrum (600MHz,  $\text{CDCl}_3$ ) of Compound **46**

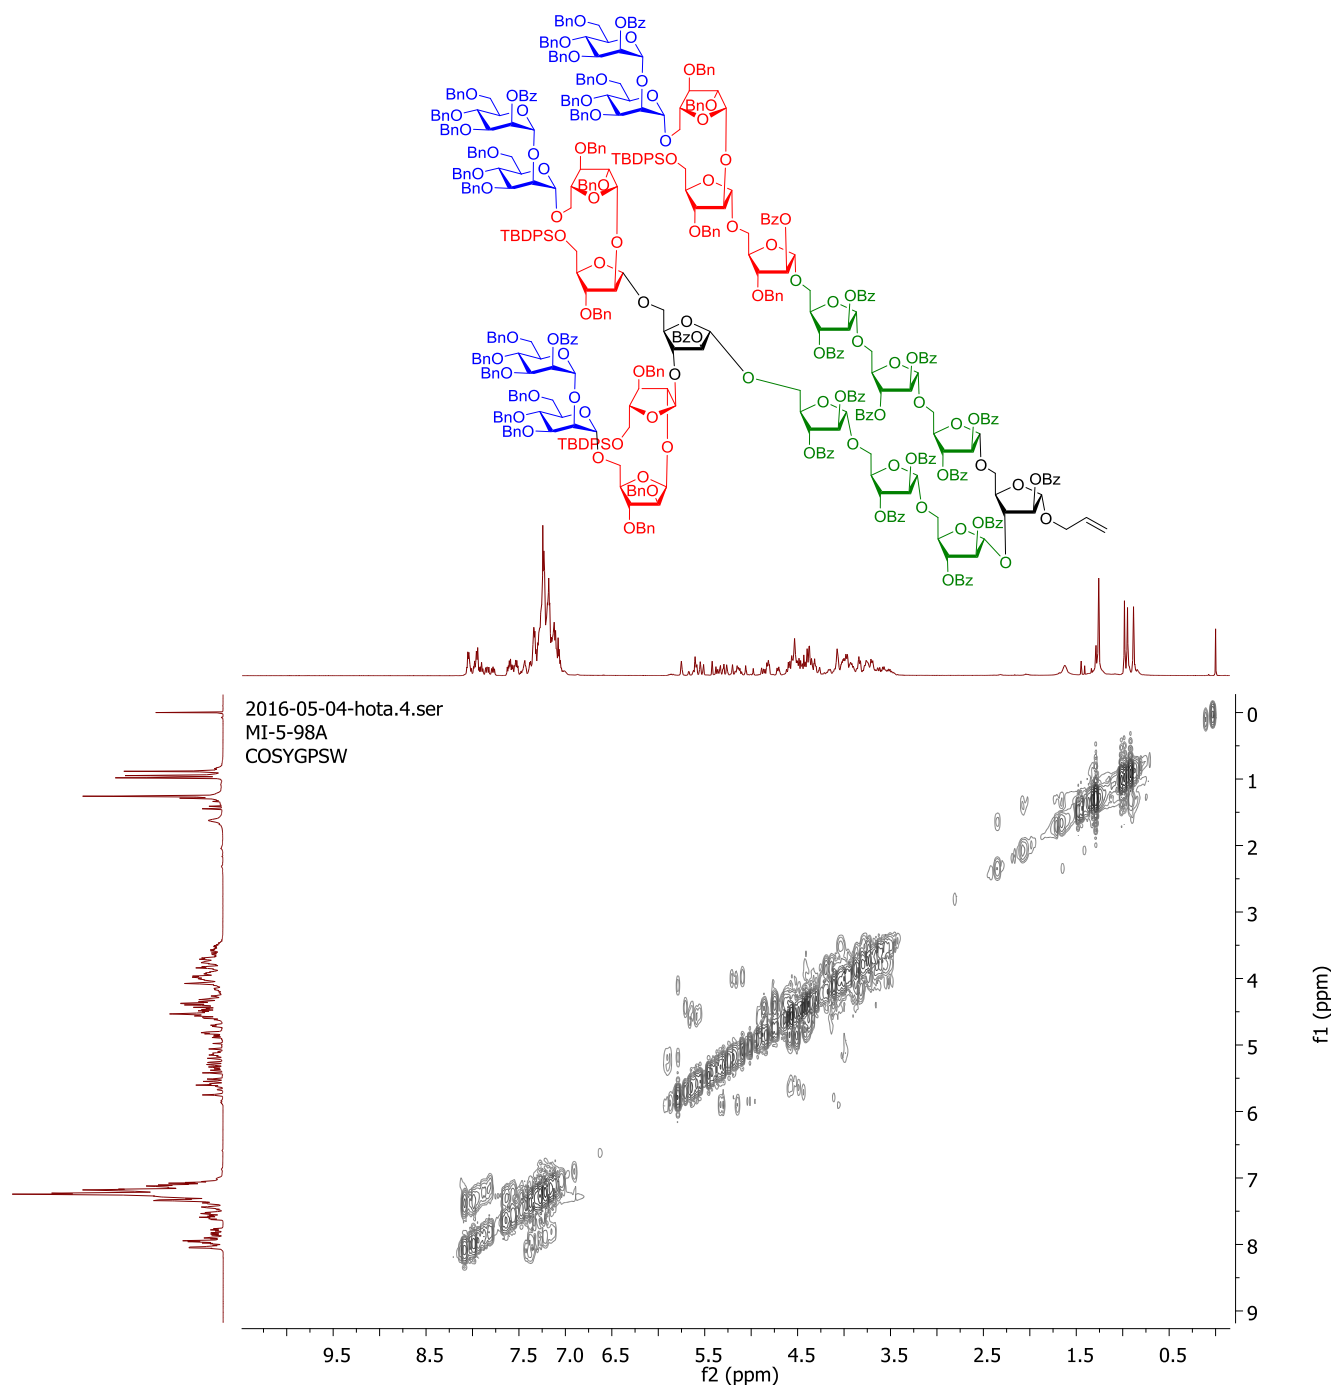

$^1\text{H}$ - $^{13}\text{C}$  HSQC Spectrum (600/150.99 MHz,  $\text{CDCl}_3$ ) of Compound **46**

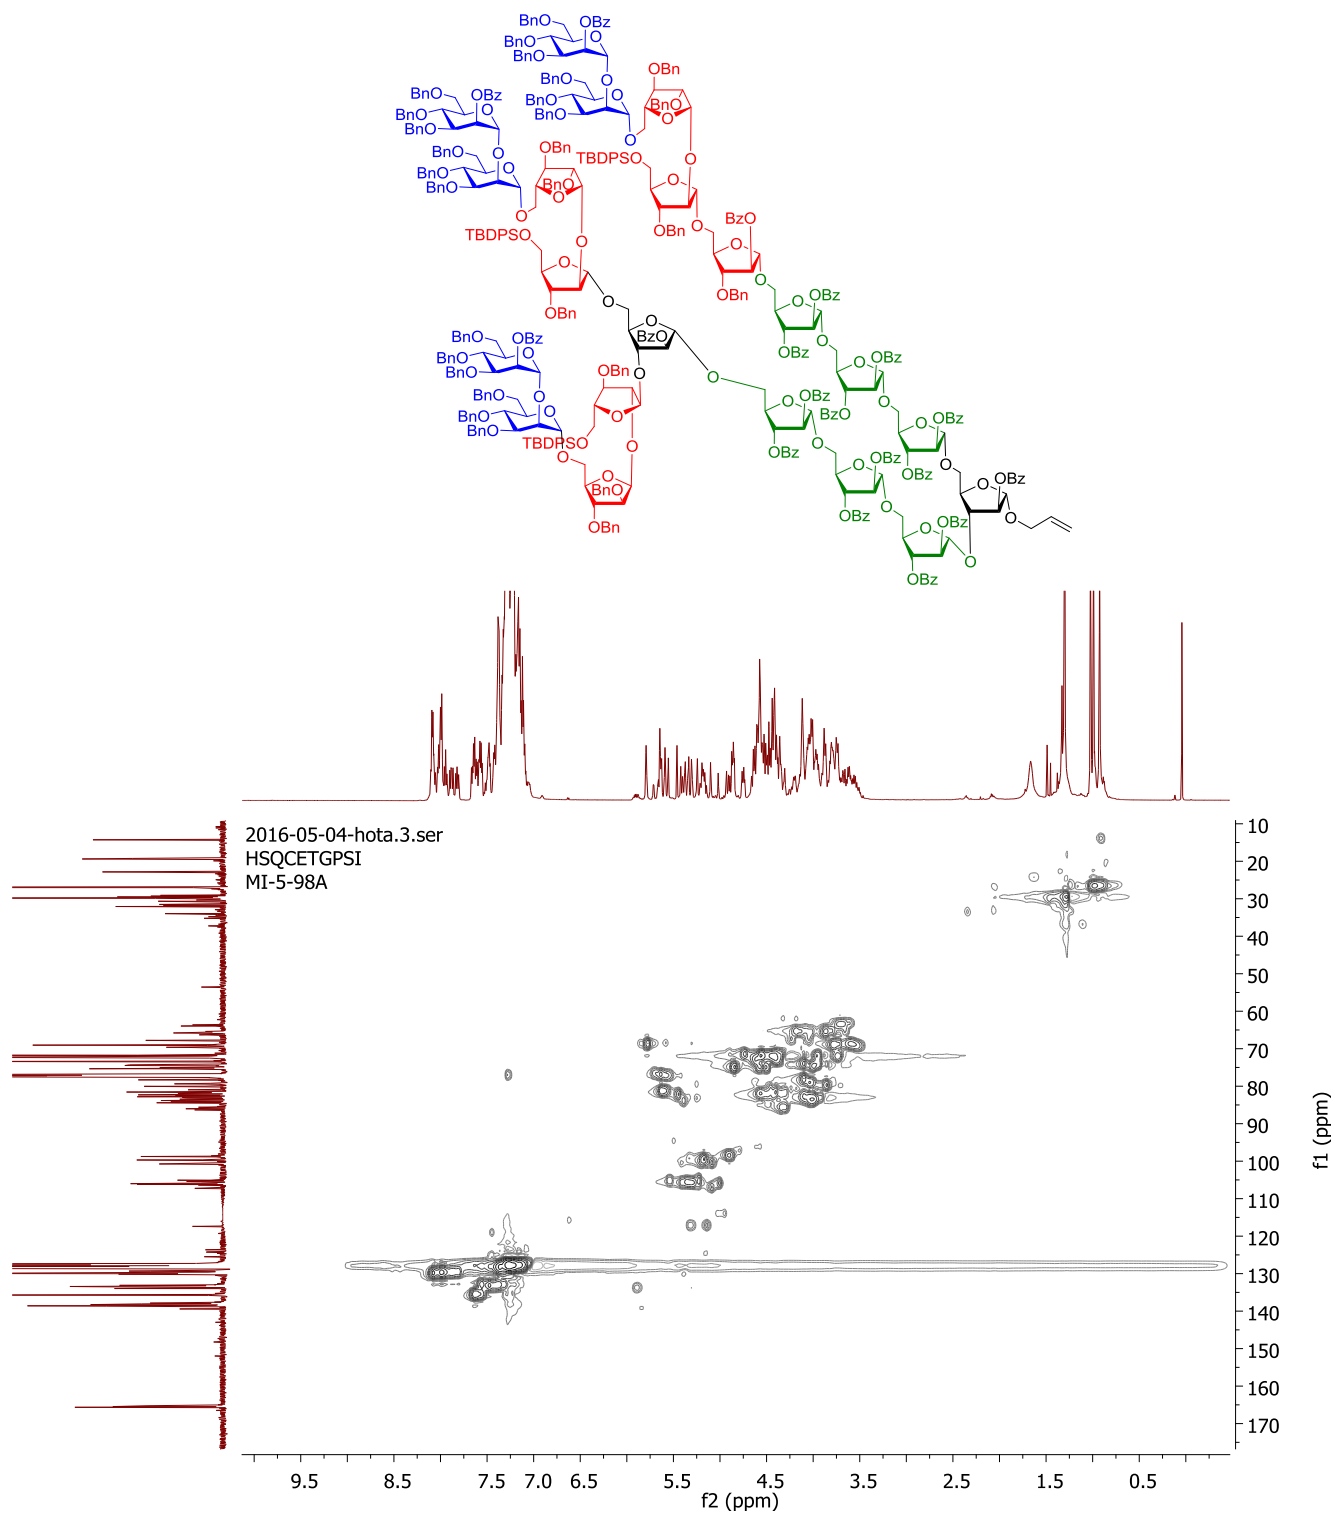

<sup>1</sup>H NMR Spectrum (600.40 MHz, D<sub>2</sub>O) of Compound **47**

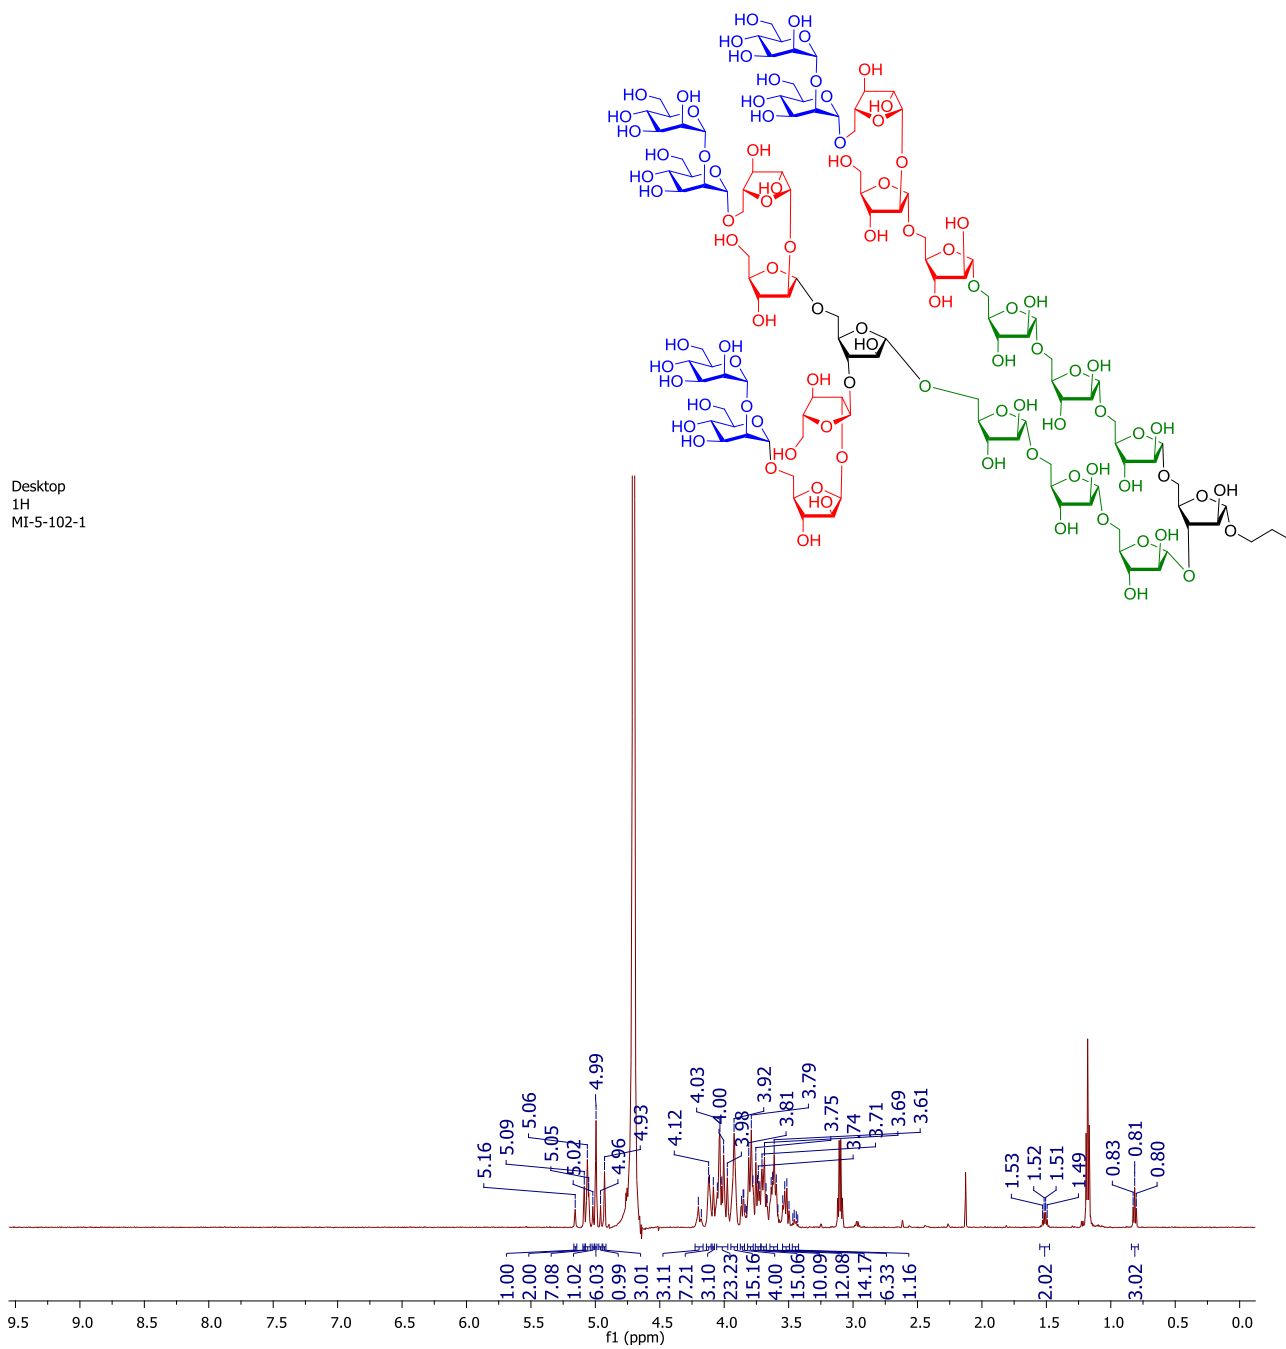

Desktop  
1H  
MI-5-102-1

# $^{13}\text{C}$ NMR Spectrum (150.99 MHz, $\text{D}_2\text{O}$ ) of Compound 47

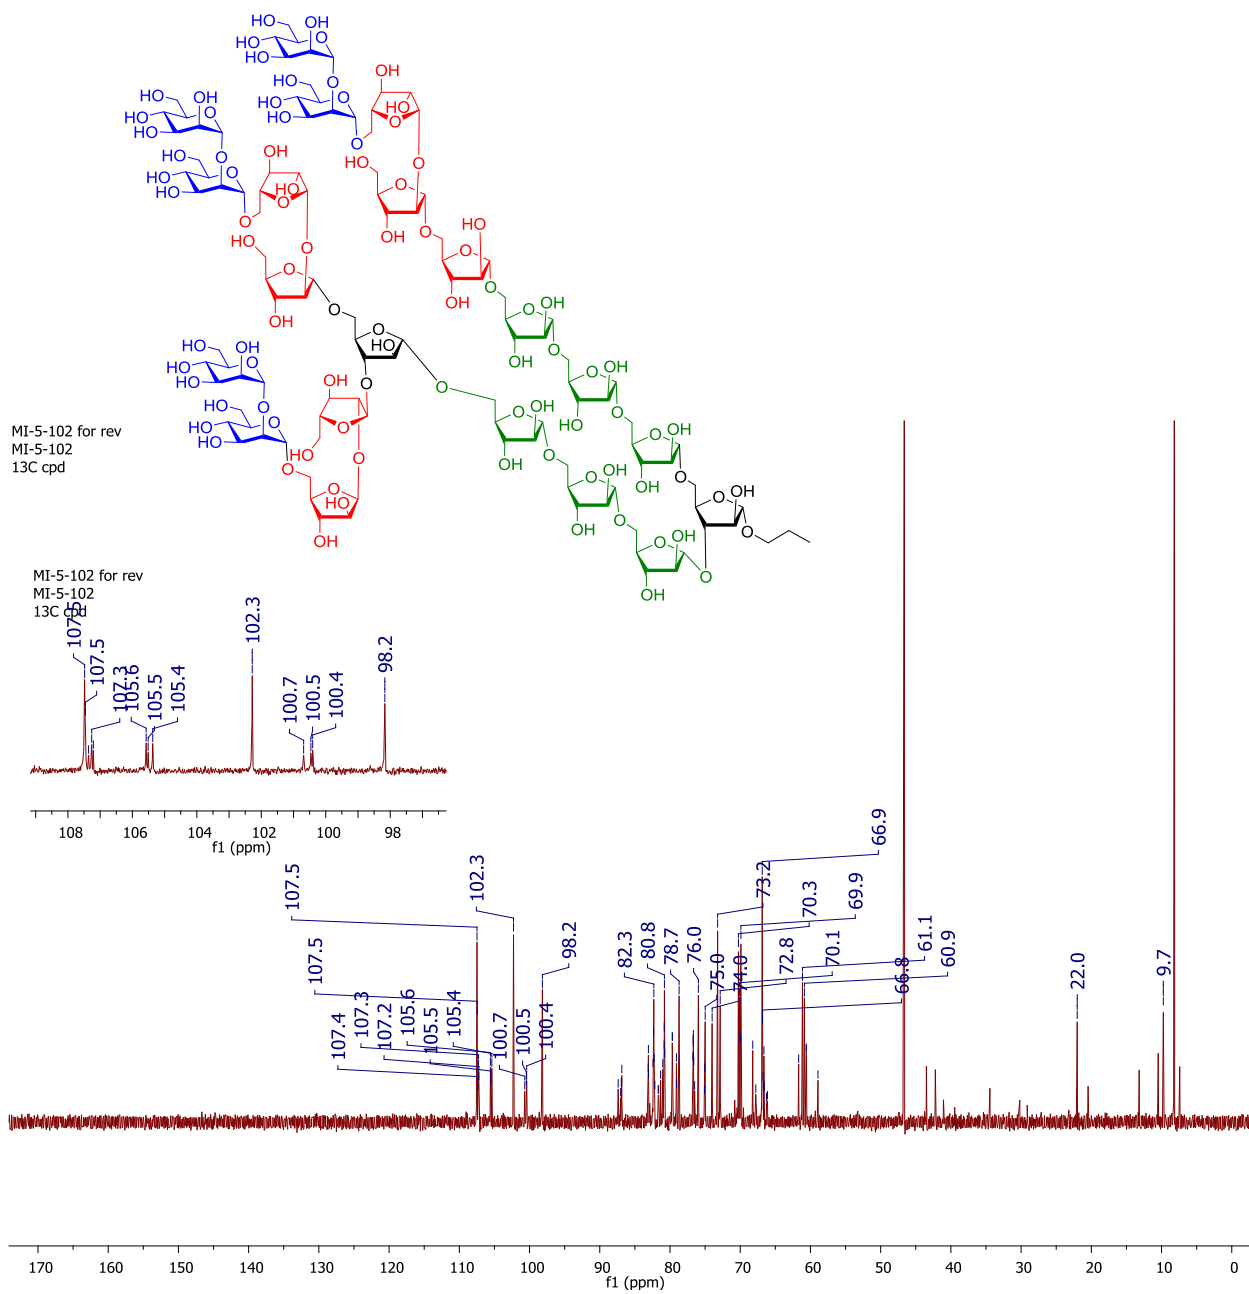



# DEPT Spectrum (150.99 MHz, D<sub>2</sub>O) of Compound 47

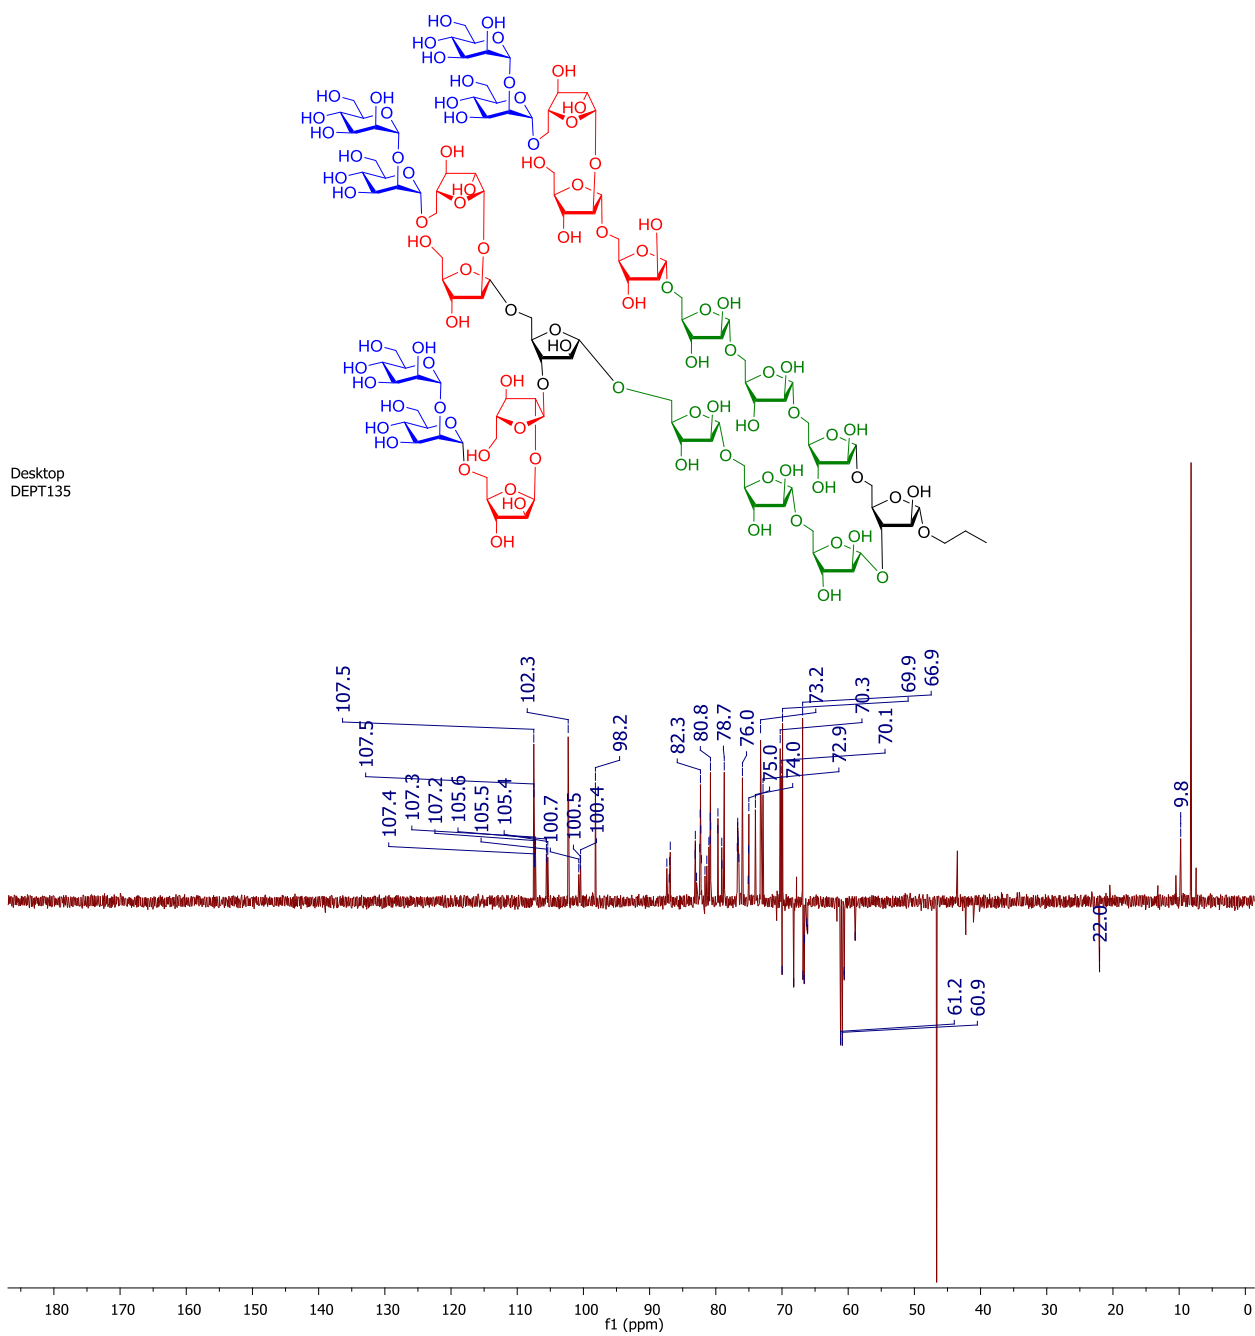

Supplement: SC-008-C6SC04866H-s001.pdf [file SC-008-C6SC04866H-s001.pdf]
